# Supplementary material for: Parents’ experiences regarding neonatal care during the COVID-19 pandemic: country-specific findings of a multinational survey
Source: PubMed Central journal article supplement — BMJ Open. 2022 Apr 7;12(4):e056856. doi: 10.1136/bmjopen-2021-056856 (PMC8990262; doi:10.1136/bmjopen-2021-056856), 2022-04-07
Supplement: bmjopen-2021-056856.draft_revisions.pdf [file bmjopen-2021-056856.draft_revisions.pdf]

# BMJ Open

BMJ Open is committed to open peer review. As part of this commitment we make the peer review history of every article we publish publicly available.

When an article is published we post the peer reviewers' comments and the authors' responses online. We also post the versions of the paper that were used during peer review. These are the versions that the peer review comments apply to.

The versions of the paper that follow are the versions that were submitted during the peer review process. They are not the versions of record or the final published versions. They should not be cited or distributed as the published version of this manuscript.

BMJ Open is an open access journal and the full, final, typeset and author-corrected version of record of the manuscript is available on our site with no access controls, subscription charges or pay-per-view fees (<http://bmjopen.bmj.com>).

If you have any questions on BMJ Open's open peer review process please email [info.bmjopen@bmj.com](mailto:info.bmjopen@bmj.com)

# BMJ Open

## Parents' experiences regarding neonatal care during the COVID-19 pandemic – country-specific findings of a multi-national survey

|                               |                                                                                                                                                                                                                                                                                                                                                                                                                                                                                                                                                                                                                                                                                                                                  |
|-------------------------------|----------------------------------------------------------------------------------------------------------------------------------------------------------------------------------------------------------------------------------------------------------------------------------------------------------------------------------------------------------------------------------------------------------------------------------------------------------------------------------------------------------------------------------------------------------------------------------------------------------------------------------------------------------------------------------------------------------------------------------|
| Journal:                      | <i>BMJ Open</i>                                                                                                                                                                                                                                                                                                                                                                                                                                                                                                                                                                                                                                                                                                                  |
| Manuscript ID                 | bmjopen-2021-056856                                                                                                                                                                                                                                                                                                                                                                                                                                                                                                                                                                                                                                                                                                              |
| Article Type:                 | Original research                                                                                                                                                                                                                                                                                                                                                                                                                                                                                                                                                                                                                                                                                                                |
| Date Submitted by the Author: | 27-Aug-2021                                                                                                                                                                                                                                                                                                                                                                                                                                                                                                                                                                                                                                                                                                                      |
| Complete List of Authors:     | Kostenzer, Johanna; European Foundation for the Care of Newborn Infants, Scientific Affairs<br>von Rosenstiel-Pulver, Charlotte; European Foundation for the Care of Newborn Infants, Scientific Affairs<br>Hoffmann, Julia; European Foundation for the Care of Newborn Infants, Scientific Affairs<br>Walsh, Aisling; European Foundation for the Care of Newborn Infants, Scientific Affairs<br>Mader, Silke; European Foundation for the Care of Newborn Infants, Scientific Affairs<br>Zimmermann, Luc; European Foundation for the Care of Newborn Infants, Scientific Affairs; Maastricht UMC+, Department of Paediatrics, Research School Oncology and Development<br>COVID-19 Zero Separation Collaborative Group, n.a. |
| Keywords:                     | COVID-19, Public health < INFECTIOUS DISEASES, Neonatal intensive & critical care < INTENSIVE & CRITICAL CARE, NEONATOLOGY, PUBLIC HEALTH, Health policy < HEALTH SERVICES ADMINISTRATION & MANAGEMENT                                                                                                                                                                                                                                                                                                                                                                                                                                                                                                                           |
|                               |                                                                                                                                                                                                                                                                                                                                                                                                                                                                                                                                                                                                                                                                                                                                  |

SCHOLARONE™  
Manuscripts

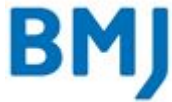

I, the Submitting Author has the right to grant and does grant on behalf of all authors of the Work (as defined in the below author licence), an exclusive licence and/or a non-exclusive licence for contributions from authors who are: i) UK Crown employees; ii) where BMJ has agreed a CC-BY licence shall apply, and/or iii) in accordance with the terms applicable for US Federal Government officers or employees acting as part of their official duties; on a worldwide, perpetual, irrevocable, royalty-free basis to BMJ Publishing Group Ltd ("BMJ") its licensees and where the relevant Journal is co-owned by BMJ to the co-owners of the Journal, to publish the Work in this journal and any other BMJ products and to exploit all rights, as set out in our [licence](#).

The Submitting Author accepts and understands that any supply made under these terms is made by BMJ to the Submitting Author unless you are acting as an employee on behalf of your employer or a postgraduate student of an affiliated institution which is paying any applicable article publishing charge ("APC") for Open Access articles. Where the Submitting Author wishes to make the Work available on an Open Access basis (and intends to pay the relevant APC), the terms of reuse of such Open Access shall be governed by a Creative Commons licence – details of these licences and which [Creative Commons](#) licence will apply to this Work are set out in our licence referred to above.

Other than as permitted in any relevant BMJ Author's Self Archiving Policies, I confirm this Work has not been accepted for publication elsewhere, is not being considered for publication elsewhere and does not duplicate material already published. I confirm all authors consent to publication of this Work and authorise the granting of this licence.

1  
2  
3 1 *Parents' experiences regarding neonatal care during the COVID-19 pandemic*  
4 2 *– country-specific findings of a multi-national survey*  
5 3  
6 4  
7 5  
8 6  
9 7

10 7 **Authors:**  
11 8

12 9 Johanna Kostenzer<sup>1</sup>, Charlotte von Rosenstiel-Pulver<sup>1</sup>, Julia Hoffmann<sup>1</sup>, Aisling Walsh<sup>1</sup>, Silke Mader<sup>1\*</sup>,  
13 10 Luc J.I. Zimmermann<sup>1,2</sup>, on behalf of the COVID-19 Zero Separation Collaborative Group  
14 11

15 12 <sup>1</sup>European Foundation for the Care of Newborn Infants (EFCNI), Scientific Affairs, Hofmannstrasse  
16 13 7A, D-81379 München, Germany  
17 14

18 15 <sup>2</sup>Department of Paediatrics, Research School Oncology and Development, Maastricht UMC+,  
19 16 Maastricht, The Netherlands  
20 17  
21 18  
22 19

23 20 \*Corresponding author: Silke Mader, European Foundation for the Care of Newborn Infants (EFCNI),  
24 21 Hofmannstraße 7A, 81379 Munich, Germany, S.MaderOffice@efcni.org  
25 22  
26 23  
27 24  
28 25

29 26 Word count: 5018  
30  
31  
32  
33  
34  
35  
36  
37  
38  
39  
40  
41  
42  
43  
44  
45  
46  
47  
48  
49  
50  
51  
52  
53  
54  
55  
56  
57  
58  
59  
60

## ABSTRACT

### Objectives

The COVID-19 pandemic has disrupted healthcare systems, challenging neonatal care provision globally. Curtailed visitation policies are known to negatively affect the medical and emotional care of sick, preterm, and low birthweight infants, compromising the achievement of the 2030 Development Agenda. Focusing on infant and family-centred developmental care (IFCDC), we explored parents' experiences of the disruptions affecting newborns in need of special or intensive care during the first year of the pandemic.

### Design

Cross-sectional study using an electronic, web-based questionnaire.

### Setting

Multi-country online-survey.

### Methods

Data were collected between August and November 2020 using a pre-tested online, multi-lingual questionnaire. The target group consisted of parents of preterm, sick or low birthweight infants born during the first year of the COVID-19 pandemic and who received special/intensive care. The analysis followed a descriptive quantitative approach.

### Results

In total, 1148 participants from 12 countries (Australia, Brazil, Canada, China, France, Italy, Mexico, New Zealand, Poland, Sweden, Turkey, Ukraine) were eligible for analysis. We identified significant country-specific differences, showing that the application of IFCDC is less prone to disruptions in some countries than in others. For example, parental presence was affected: 27% of the total respondents indicated that no-one was allowed to be present with the infant receiving special/intensive care. In Australia, Canada, France, New Zealand and Sweden, both the mother and the father (in more than 90% of cases) was allowed access to the newborn, whereas participants indicated that no-one was allowed to be present in China (52%), Poland (39%), Turkey (49%), and Ukraine (32%).

### Conclusions

The application of IFCDC during the COVID-19 pandemic differs between countries. There is an urgent need to reconsider separation policies and to strengthen the infant and family-centred developmental care approach worldwide to ensure the 2030 Development Agenda is achieved.

### Strengths and limitations of this study

- This is the first multi-national survey exploring parents' experiences of the disruptions affecting newborns in need of special or intensive care during the first year of the pandemic.
- The cross-country approach, data collection in 12 countries and extensive outreach allowed us to acquire in-depth insights into parents' experiences.
- The online format of the study bears the risk of selection bias, and response rates could not be calculated.
- The respective pandemic situation, geographical, climatic and environmental aspects, as well as containment strategies vary between (and sometimes even within) countries.
- The findings comprehensively reflect the parent perspective across multiple countries giving insights into country-specific differences.

## INTRODUCTION

During the last decades, major achievements have been made in the field of maternal and newborn health, particularly in light of the United Nations Sustainable Development Goals [1]. While efforts have resulted in a reduction of maternal and neonatal deaths and better health outcomes for newborns worldwide, progress in particular affecting preterm, sick, and low birthweight infants has been slow [1,2]. Pandemic-related shortages in maternal and newborn care provision have severe consequences for vulnerable infants and their families [3–5], continuing to threaten the achievement of the 2030 Development Agenda [6].

Worldwide, one in ten infants is born preterm every year, with increasing rates in almost all countries where reliable epidemiologic datasets are available, making it a truly global problem [7]. Preterm birth is the leading cause of death under five years of age, and together with birth complications, it is the leading cause of neonatal death [6,8,9]. The extremely fragile group of patients requires highly specialised care, which is labour and cost intense, and thus, stark regional discrepancies in the availability of specialised care are well described [10]. However, whilst international agreements, like the United Nations Convention on the Rights of the Child or the European Association for Children in Hospital (EACH), foster the right of children to be close to their parents [11,12], these rights have not yet been implemented in the majority of neonatal units across the globe where parents and their newborns have often been separated – already in pre-pandemic times – yet increasingly as a response to the ongoing global health crisis [13–15].

The COVID-19 pandemic and related restrictions have resulted in severe limitations in neonatal care provision [16], especially regarding acknowledged elements of infant- and family-centred developmental care (IFCDC) [15,17–23]. The frequently implemented separation of parents and their newborns has negative implications for the health outcomes of newborns [24–26], interfering with acknowledged practices such as Kangaroo Mother Care (KMC), skin-to-skin contact [27], and breastfeeding [28]. The reduction of parental presence in the neonatal intensive care units (NICU) has led to increased stress and mental health problems among parents and families, raising the risk of postnatal depression and posttraumatic stress syndrome, and limited opportunities for parent-infant bonding [14,15], while staff shortages and the lack of available guidelines have led to high levels of stress and anxiety among health professionals [17,29]. Few studies and reports have provided insights into parents' experiences regarding some of the implemented restrictions [14,15,30]. However, a comparative and holistic approach, emphasising the cornerstones of IFCDC, has been missing so far, which is the focus of this research.

With this study, we explored parents' experiences of disruptions to neonatal care during the first year of the COVID-19 pandemic across the globe, focusing on individual country actions. We aimed to document the challenges experienced by parents, spanning wide variations across countries and regions. The analysis and corresponding findings shall provide an incentive for policy makers, public health experts, and healthcare professionals alike to learn from the different approaches and subsequent implications of the outcomes of single countries and underline the importance of parents' involvement in the care of vulnerable newborns. It is imperative that this occurs, irrespective of the ongoing pandemic or future emergency situations.

## METHODS

### Study design and population

We conducted a cross-sectional study using an electronic, web-based questionnaire with the aim to explore parents' experiences during the first year of the COVID-19 pandemic with regard to the core elements of IFCDC. Eligible for participation were parents of preterm, sick or low birthweight infants born during the first year of the COVID-19 pandemic (as of December 1, 2019) and who were receiving special or intensive care (inclusion criteria). The term "parent" was broadly defined, encompassing biological and/or social parents, allowing for self-definition as "mother," "father," or "other parent." We

1  
2  
3 133 conducted and reported the study according to the Checklist for Reporting Results of Internet E-Surveys  
4 134 (CHERRIES) [31].  
5 135

6 136 Participants were recruited by the European Foundation for the Care of Newborn Infants (EFCNI), and  
7 137 its initiative, the Global Alliance for Newborn Care (GLANCE), through social media activities,  
8 138 newsletters, website outreach, and mailings. In addition, national parent organisations and the  
9 139 collaborating professional healthcare associations and their members, namely the Council of  
10 140 International Neonatal Nurses (COINN), the European Society for Paediatric Research (ESPR), the  
11 141 Neonatal Individualised Developmental Care and Assessment Project (NIDCAP), and the Union of  
12 142 European Neonatal and Perinatal Societies (UENPS), supported the dissemination of the survey link by  
13 143 promoting the study across their networks. Participation was voluntary, data collection occurred  
14 144 anonymously.  
15 145

### 16 146 **Questionnaire development and pre-testing**

17 147

18 148 Researchers of the EFCNI scientific department developed the questionnaire in collaboration with the  
19 149 members of the COVID-19 Zero Separation Collaborative Group – an interdisciplinary stakeholder  
20 150 group including medical experts and parent/patient representatives. The survey was pre-tested among  
21 151 n=8 parents who met the target group criteria who did not request any changes of the questionnaire.  
22 152

23 153 The questionnaire consisted of 52 questions with pre-defined answers and single or multiple response  
24 154 answer options. It encompassed information about the respondent and infant, and COVID-19-related  
25 155 topics as well as categories of IFCDC [21], including the following elements: (1) background  
26 156 information, (2) COVID-19 testing and measures in the respective country/region (3) access to perinatal  
27 157 care, (4) presence with the newborn receiving special/intensive care, (5) breastfeeding/infant nutrition,  
28 158 (6) health communication, and (7) mental health and support. Parent representatives from EFCNI's  
29 159 international parent network supported the translations of the final version into 23 languages, which  
30 160 were all reviewed and approved by native medical professionals.  
31 161

### 32 162 **Data collection and statistical analysis**

33 163

34 164 Data were collected between August and November 2020 using the SurveyMonkey® online survey tool.  
35 165 The analysis included answers from all respondents who met the inclusion criteria, regardless of whether  
36 166 they completed the survey to the end. The subsequent analysis was performed as sub-analysis based on  
37 167 a global survey with available data from 56 countries as previously described elsewhere [16]. For this  
38 168 sub-analysis, countries having a minimum of at least 30 answers per country were considered eligible  
39 169 for inclusion. A subsequent country selection depending on pre-defined criteria, such as geographical  
40 170 variation and COVID-19 situation was conducted by the main authors of this study using a consensus  
41 171 approach resulting in the following included countries: Australia, Brazil, Canada, China, France, Italy,  
42 172 Mexico, New Zealand, Poland, Sweden, Turkey, and Ukraine.  
43 173

44 174 Data analysis was conducted using an exploratory approach with descriptive statistics (relative  
45 175 frequency and proportion (n (%)). Multiple-answer questions were analysed as the sum of the number  
46 176 of responses per answer choice (n (%)) and may exceed 100%. Means, standard deviations and  
47 177 confidence intervals (CI) were calculated to compare data between countries. A CI for difference in  
48 178 means was calculated for questions related to presence with the newborn and skin-to-skin care using  
49 179 one answer option in order to determine statistically significant deviations between countries. A colour-  
50 180 coding indicated countries whose 95% CI for difference in means was higher (blue) or lower (green)  
51 181 than the mean CI of all countries. All analyses presented herein were carried out using SPSS software  
52 182 (IBM SPSS Statistics for Windows, version 27-0, IBM Corp, Armonk, New York) and Microsoft Excel  
53 183 (version 16).  
54 184

### 55 185 **Ethical considerations**

56 186

57 187 Data collection, processing and storage conformed to the General Data Protection Regulation and the  
58 188 Declaration of Helsinki. Informed consent was given by ticking a confirmation box. For those who



declined to participate, the web-interface was terminated. Respondents were informed that some of the questions might cause distressing reactions in view of their personal experiences, and they had the opportunity to stop participation at any time. No financial or other incentives were offered to the participants. The Ethics Committee of Maastricht UMC+, the Netherlands, has waived the need for ethical approval for this study (MECT 2020-1336).

### Patient and public involvement

EFCNI, as a pan-European network of parent organisations, was the initiator of this research project and responsible for all phases of the study. In addition, representatives from national parent organisations worldwide were involved in the review of the questionnaire and in manuscript writing (as part of the COVID-19 Zero Separation Collaborative Group). Additionally, they supported the translation and dissemination of the survey in their network, and will again be involved in the dissemination of the results.

## RESULTS

### Baseline and COVID-19 related characteristics

In total, 1148 participants from Australia, Brazil, Canada, China, France, Italy, Mexico, New Zealand, Poland, Sweden, Turkey and Ukraine were eligible for analysis (Figure 1A). Baseline characteristics of participants are shown in Table 1. Nearly all answers were obtained from mothers of the infant (n=1093; 95%) and the majority of participants was between 30 and 39 years old (53%). Most infants were born very preterm (28–<32 weeks of gestation; 35%) or moderate to late preterm infants (32–<37 weeks of gestation; 37%), and were born through caesarean section (72%). Almost 50% of the infants required special/intensive care for over five weeks at the time of answering the questionnaire (Table 1). Baseline characteristics of participants per country are pre-specified in Supplementary Table S1 and partly differed on country-level.

Overall, 41% of the respondents faced lockdown measures in their country/region at the time of birth, 30% were encouraged to adhere to social distancing and 13% were located in countries/regions where precautions were advised or quarantine was implemented (11%, Table 1). In total, 2% of the respondents and 2% of the respondents' partners had tested positive for COVID-19, with the highest numbers in Mexico (12% for both options). Overall, five newborns tested positive for COVID-19 (Table 1).

Table 1. Baseline and COVID-19 characteristics of participants

|                                                                                | Total           |
|--------------------------------------------------------------------------------|-----------------|
| <b>Age of respondent (years)</b>                                               | <b>n = 1146</b> |
| <20                                                                            | 5 (0%)          |
| 20–29                                                                          | 468 (41%)       |
| 30–39                                                                          | 608 (53%)       |
| >40                                                                            | 65 (6%)         |
| <b>Gestational age at birth (weeks)</b>                                        | <b>n = 1107</b> |
| Early preterm: <28                                                             | 270 (24%)       |
| Very preterm: 28–<32                                                           | 389 (35%)       |
| Moderate to late preterm: 32–<37                                               | 412 (37%)       |
| Term: 37–42                                                                    | 36 (3%)         |
| <b>Multiple pregnancy</b>                                                      | <b>n = 1112</b> |
| Yes                                                                            | 180 (16%)       |
| No                                                                             | 932 (84%)       |
| <b>Birth mode</b>                                                              | <b>n = 1111</b> |
| Vaginal birth                                                                  | 301 (27%)       |
| C-section                                                                      | 804 (72%)       |
| Both (e.g. in case of multiple pregnancy)                                      | 6 (1%)          |
| <b>Birth weight of the baby (grams)</b>                                        | <b>n = 1110</b> |
| <1000                                                                          | 290 (26%)       |
| 1000–1500                                                                      | 373 (34%)       |
| >1500–2500                                                                     | 374 (34%)       |
| >2500                                                                          | 71 (6%)         |
| Don't know the birth weight                                                    | 2 (0%)          |
| <b>Duration of special/intensive care (weeks) (at time of data collection)</b> | <b>n = 1112</b> |
| <1                                                                             | 81 (7%)         |

|                                                                     |                 |
|---------------------------------------------------------------------|-----------------|
| 1-3                                                                 | 251 (23%)       |
| >3-5                                                                | 277 (25%)       |
| >5                                                                  | 503 (45%)       |
| <b>COVID-19 situation in country/region at time of baby's birth</b> | <b>n = 1071</b> |
| No major concern                                                    | 49 (5%)         |
| Precautions                                                         | 137 (13%)       |
| Social distancing                                                   | 325 (30%)       |
| Lockdown                                                            | 438 (41%)       |
| Quarantine                                                          | 122 (11%)       |
| <b>Have you tested positive for Coronavirus/COVID-19?</b>           | <b>n = 1084</b> |
| Yes                                                                 | 27 (2%)         |
| No                                                                  | 1057 (98%)      |
| <b>Has your partner tested positive for Coronavirus/COVID-19?</b>   | <b>n = 1086</b> |
| Yes                                                                 | 25 (2%)         |
| No                                                                  | 1039 (96%)      |
| Don't know                                                          | 22 (2%)         |
| <b>Has your baby tested positive for Coronavirus/COVID-19?</b>      | <b>n = 1087</b> |
| Yes                                                                 | 5 (0%)          |
| No                                                                  | 1035 (95%)      |
| Don't know                                                          | 47 (4%)         |

## Prenatal care and birth

Significant variations regarding the presence of support persons during pregnancy-related appointments and birth could be observed (Figure 1B and Figure 1C). In total, 41% of all participants were not allowed to have a companion present during pregnancy-related appointments. This number was highest in Sweden and Poland (>60%) and lowest in Australia (20%). During birth, 57% of the respondents were not permitted to have another person present (Figure 1C). In Mexico, 87% of the women gave birth without a supporting companion. In Poland, this applied to 90% of the respondents. In Australia, New Zealand and Sweden >90% of the women were permitted to have another person present, and in Australia 90% of the accompanying persons could stay for the entire labour (Supplementary Table S2). Likewise, in Brazil, China and New Zealand >85% of the accompanying persons could stay during the entire labour (Supplementary Table S2).

[Figure 1 here]

## Presence with the newborn and skin-to-skin care

In total, 82% of the participants answered that the COVID-19 pandemic affected the facility policy around their ability to be present with the newborn receiving special/intensive care (Table 3). Parental presence was one of the areas affected most, with 27% percent of the total respondents indicating that no-one was allowed to be present with the newborn, with highest numbers in China (52%) and Turkey (49%).

Analysis showed country-specific differences regarding access of family members to the hospitalised infant: around 80–>90% of participants from Australia, Canada, France, New Zealand and Sweden answered that both parents were allowed access. Lower proportions were observed for the remaining countries, with the lowest numbers in China where 35% of the mothers and 29% of the fathers were permitted to be present with the newborn (Table 3). More than half of the participants in Australia, China, France, New Zealand, and Sweden indicated that more than one person was allowed to be present with the newborn at the same time (Table 3).

Overall, 32% of the respondents could see their newborn all the time (24/7), and 13% multiple times per day (Figure 1A). More than 20% were not allowed to see their newborn at any time, which was particularly observed in China (85%) and also reported by respondents from Mexico (14%), Poland (28%), Turkey (36%) and Ukraine (15%, Figure 1A). While more than half of the respondents from Poland were provided with either photos, livestream options or recorded videos as alternative tools to being present, parents from Mexico (78%), Turkey (55%) and Ukraine (81%) were mostly not offered any alternatives (Supplementary Table S3).

1  
2  
3 267  
4 268 While in Australia, Canada, France, New Zealand and Sweden more than 80% of the respondents had  
5 269 unlimited access to their newborn, other countries implemented duration restrictions (Table 3).  
6 270 Significantly high proportions of being “not at all” allowed to be present with the infant were noted in  
7 271 China (87%) and Turkey (34%). In Mexico, Turkey and Ukraine more than half of the respondents  
8 272 indicated that they were allowed to see their baby for up to one hour. More than 70% of the respondents  
9 273 from Canada, China, Mexico, Poland, Turkey and Ukraine felt that the measures implemented due to  
10 274 COVID-19 made it more difficult for them to be present, and more than 70% from China, Mexico,  
11 275 Poland and Turkey to be interactive with their newborn, e.g. regarding skin-to-skin contact (Table 3).  
12 276

13 277 The possibilities to have skin-to-skin contact with the infant differed between countries, with  
14 278 significantly high proportions of respondents in Mexico (47%) and Turkey (49%) indicating that skin-  
15 279 to-skin care was not initiated during the time in the hospital. In China, most respondents (85%) answered  
16 280 that skin-to-skin care had not yet been initiated (if still in the hospital). In the remaining countries, skin-  
17 281 to-skin care was mainly initiated after the first day but during the first week with few exceptions having  
18 282 high answer rates with regards to an early initiation (immediately after birth or on the first day) such as  
19 283 France. In Sweden and France >80% of the mothers were permitted to have skin-to-skin contact with  
20 284 their newborn as often as they wanted. While >95% of the respondents from Australia, Brazil, Canada,  
21 285 France, New Zealand and Sweden could touch their newborn in the incubator or bed as often as they  
22 286 wanted or at least once per day, 92% of the participants in China, and 60% in Turkey were not permitted  
23 287 to do so (Table 3).  
24 288

25 289 The involvement in the care was perceived differently by parents across countries. While participants  
26 290 from Australia, France, New Zealand and Sweden felt they were highly involved in the care by medical  
27 291 and nursing staff (>80%), more than 70% of participants in China, Poland, Turkey and Ukraine felt that  
28 292 staff did neither include them nor their partner in the care. In addition, while the majority of participants  
29 293 from Sweden (85%) responded that also their partner was highly involved by medical and nursing staff,  
30 294 this was not the case for participants in Turkey.  
31  
32  
33  
34  
35  
36  
37  
38  
39  
40  
41  
42  
43  
44  
45  
46  
47  
48  
49  
50  
51  
52  
53  
54  
55  
56  
57  
58  
59  
60

295 Table 3. Presence with the newborn and skin-to-skin care

|                                                                                                                                                                                                                                                                           | Total              | Australia         | Brazil           | Canada           | China            | France            | Italy            | Mexico           | New Zealand      | Poland            | Sweden            | Turkey            | Ukraine           |
|---------------------------------------------------------------------------------------------------------------------------------------------------------------------------------------------------------------------------------------------------------------------------|--------------------|-------------------|------------------|------------------|------------------|-------------------|------------------|------------------|------------------|-------------------|-------------------|-------------------|-------------------|
| <b>Do you know if the Coronavirus/COVID-19 situation affected the facility policy around your ability to be present with the baby receiving special/intensive care?</b>                                                                                                   |                    |                   |                  |                  |                  |                   |                  |                  |                  |                   |                   |                   |                   |
|                                                                                                                                                                                                                                                                           | n = 991            | n = 55            | n = 34           | n = 49           | n = 52           | n = 110           | n = 34           | n = 37           | n = 31           | n = 132           | n = 73            | n = 288           | n = 96            |
| There were no changes                                                                                                                                                                                                                                                     | 80 (8%)            | 7 (13%)           | 2 (6%)           | 2 (4%)           | 5 (10%)          | 12 (11%)          | 4 (12%)          | 2 (5%)           | 4 (13%)          | 4 (3%)            | 23 (32%)          | 10 (3%)           | 5 (5%)            |
| Restrictions were implemented                                                                                                                                                                                                                                             | 816 (82%)          | 44 (80%)          | 30 (88%)         | 44 (90%)         | 36 (69%)         | 94 (85%)          | 27 (79%)         | 34 (92%)         | 25 (81%)         | 118 (89%)         | 44 (60%)          | 241 (84%)         | 79 (82%)          |
| I don't know if there were changes                                                                                                                                                                                                                                        | 95 (10%)           | 4 (7%)            | 2 (6%)           | 3 (6%)           | 11 (21%)         | 4 (4%)            | 3 (9%)           | 1 (3%)           | 2 (6%)           | 10 (8%)           | 6 (8%)            | 37 (13%)          | 12 (13%)          |
| <b>Who was allowed to be present with your baby receiving special/intensive care? (multiple answers possible)</b>                                                                                                                                                         |                    |                   |                  |                  |                  |                   |                  |                  |                  |                   |                   |                   |                   |
|                                                                                                                                                                                                                                                                           | n = 991            | n = 55            | n = 34           | n = 49           | n = 52           | n = 110           | n = 34           | n = 37           | n = 31           | n = 132           | n = 73            | n = 288           | n = 96            |
| <b>Sum of multiple answers</b>                                                                                                                                                                                                                                            | <b>1497 (151%)</b> | <b>112 (204%)</b> | <b>57 (168%)</b> | <b>89 (182%)</b> | <b>73 (140%)</b> | <b>215 (195%)</b> | <b>59 (174%)</b> | <b>57 (154%)</b> | <b>56 (181%)</b> | <b>155 (117%)</b> | <b>145 (199%)</b> | <b>368 (128%)</b> | <b>111 (116%)</b> |
| Mother                                                                                                                                                                                                                                                                    | 680 (69%)          | 52 (95%)          | 30 (88%)         | 44 (90%)         | 18 (35%)         | 101 (92%)         | 30 (88%)         | 25 (68%)         | 28 (90%)         | 84 (64%)          | 60 (82%)          | 142 (49%)         | 66 (69%)          |
| Father/partner                                                                                                                                                                                                                                                            | 501 (51%)          | 54 (98%)          | 24 (71%)         | 42 (86%)         | 15 (29%)         | 106 (96%)         | 27 (79%)         | 23 (62%)         | 26 (84%)         | 19 (14%)          | 68 (93%)          | 84 (29%)          | 13 (14%)          |
| Sibling/s                                                                                                                                                                                                                                                                 | 27 (3%)            | 3 (5%)            | 0 (0%)           | 1 (2%)           | 3 (6%)           | 6 (5%)            | 0 (0%)           | 0 (0%)           | 1 (3%)           | 0 (0%)            | 12 (16%)          | 0 (0%)            | 1 (1%)            |
| Other family members                                                                                                                                                                                                                                                      | 14 (1%)            | 3 (5%)            | 2 (6%)           | 1 (2%)           | 3 (6%)           | 0 (0%)            | 0 (0%)           | 1 (3%)           | 1 (3%)           | 0 (0%)            | 3 (4%)            | 0 (0%)            | 0 (0%)            |
| Friends                                                                                                                                                                                                                                                                   | 2 (0%)             | 0 (0%)            | 0 (0%)           | 1 (2%)           | 0 (0%)           | 0 (0%)            | 0 (0%)           | 0 (0%)           | 0 (0%)           | 0 (0%)            | 1 (1%)            | 0 (0%)            | 0 (0%)            |
| No one                                                                                                                                                                                                                                                                    | 265 (27%)          | 0 (0%)            | 1 (3%)           | 0 (0%)           | 27 (52%)         | 2 (2%)            | 2 (6%)           | 8 (22%)          | 0 (0%)           | 52 (39%)          | 1 (1%)            | 141 (49%)         | 31 (32%)          |
| I don't know                                                                                                                                                                                                                                                              | 8 (1%)             | 0 (0%)            | 0 (0%)           | 0 (0%)           | 7 (13%)          | 0 (0%)            | 0 (0%)           | 0 (0%)           | 0 (0%)           | 0 (0%)            | 0 (0%)            | 1 (0%)            | 0 (0%)            |
| <b>Could more than one person be present with the baby at the same time?</b>                                                                                                                                                                                              |                    |                   |                  |                  |                  |                   |                  |                  |                  |                   |                   |                   |                   |
|                                                                                                                                                                                                                                                                           | n = 990            | n = 55            | n = 34           | n = 49           | n = 52           | n = 110           | n = 34           | n = 37           | n = 31           | n = 130           | n = 74            | n = 288           | n = 96            |
| Yes                                                                                                                                                                                                                                                                       | 326 (33%)          | 31 (56%)          | 9 (26%)          | 20 (41%)         | 27 (52%)         | 70 (64%)          | 2 (6%)           | 2 (5%)           | 16 (52%)         | 5 (4%)            | 62 (84%)          | 66 (23%)          | 16 (17%)          |
| No                                                                                                                                                                                                                                                                        | 664 (67%)          | 24 (44%)          | 25 (74%)         | 29 (59%)         | 25 (48%)         | 40 (36%)          | 32 (94%)         | 35 (95%)         | 15 (48%)         | 125 (96%)         | 12 (16%)          | 222 (77%)         | 80 (83%)          |
| <b>How long were you allowed to see your baby per visit?</b>                                                                                                                                                                                                              |                    |                   |                  |                  |                  |                   |                  |                  |                  |                   |                   |                   |                   |
|                                                                                                                                                                                                                                                                           | n = 989            | n = 55            | n = 34           | n = 49           | n = 52           | n = 109           | n = 34           | n = 37           | n = 31           | n = 131           | n = 73            | n = 288           | n = 96            |
| Up to an hour                                                                                                                                                                                                                                                             | 338 (34%)          | 1 (2%)            | 11 (32%)         | 0 (0%)           | 2 (4%)           | 0 (0%)            | 11 (32%)         | 31 (84%)         | 0 (0%)           | 44 (34%)          | 0 (0%)            | 186 (65%)         | 52 (54%)          |
| More than one hour, up to three hours                                                                                                                                                                                                                                     | 41 (4%)            | 2 (4%)            | 1 (3%)           | 0 (0%)           | 4 (8%)           | 5 (5%)            | 3 (9%)           | 1 (3%)           | 0 (0%)           | 22 (17%)          | 0 (0%)            | 2 (1%)            | 1 (1%)            |
| More than three hours, but not unlimited                                                                                                                                                                                                                                  | 51 (5%)            | 5 (9%)            | 5 (15%)          | 2 (4%)           | 1 (2%)           | 15 (14%)          | 3 (9%)           | 0 (0%)           | 4 (13%)          | 4 (3%)            | 2 (3%)            | 1 (0%)            | 9 (9%)            |
| Unlimited                                                                                                                                                                                                                                                                 | 360 (36%)          | 47 (85%)          | 16 (47%)         | 47 (96%)         | 0 (0%)           | 88 (81%)          | 15 (44%)         | 1 (3%)           | 27 (87%)         | 27 (21%)          | 70 (96%)          | 2 (1%)            | 20 (21%)          |
| Not at all                                                                                                                                                                                                                                                                | 199 (20%)          | 0 (0%)            | 1 (3%)           | 0 (0%)           | 45 (87%)         | 1 (1%)            | 2 (6%)           | 4 (11%)          | 0 (0%)           | 34 (26%)          | 1 (1%)            | 97 (34%)          | 14 (15%)          |
| <b>Do you feel that the measures that were implemented due to Coronavirus/COVID-19 (e.g. restrictions by hospital management) made it more difficult for you to be present with your baby?</b>                                                                            |                    |                   |                  |                  |                  |                   |                  |                  |                  |                   |                   |                   |                   |
|                                                                                                                                                                                                                                                                           | n = 990            | n = 55            | n = 34           | n = 48           | n = 51           | n = 110           | n = 34           | n = 37           | n = 31           | n = 132           | n = 74            | n = 288           | n = 96            |
| Yes                                                                                                                                                                                                                                                                       | 726 (73%)          | 33 (60%)          | 18 (53%)         | 37 (77%)         | 39 (76%)         | 61 (55%)          | 19 (56%)         | 35 (95%)         | 20 (65%)         | 112 (85%)         | 14 (19%)          | 263 (91%)         | 75 (78%)          |
| No, not more difficult                                                                                                                                                                                                                                                    | 192 (19%)          | 17 (31%)          | 15 (44%)         | 10 (21%)         | 3 (6%)           | 42 (38%)          | 14 (41%)         | 1 (3%)           | 7 (23%)          | 17 (13%)          | 46 (62%)          | 11 (4%)           | 9 (9%)            |
| No, there were no restrictive measures in place                                                                                                                                                                                                                           | 39 (4%)            | 4 (7%)            | 1 (3%)           | 1 (2%)           | 0 (0%)           | 4 (4%)            | 1 (3%)           | 1 (3%)           | 3 (10%)          | 2 (2%)            | 11 (15%)          | 3 (1%)            | 8 (8%)            |
| Don't know                                                                                                                                                                                                                                                                | 33 (3%)            | 1 (2%)            | 0 (0%)           | 0 (0%)           | 9 (18%)          | 3 (3%)            | 0 (0%)           | 0 (0%)           | 1 (3%)           | 1 (1%)            | 3 (4%)            | 11 (4%)           | 4 (4%)            |
| <b>Do you feel that the measures that were implemented due to Coronavirus/COVID-19 (e.g. restrictions by hospital management) made it more difficult for you to be interactive with your baby (e.g. skin-to-skin contact or being involved in the care of your baby)?</b> |                    |                   |                  |                  |                  |                   |                  |                  |                  |                   |                   |                   |                   |
|                                                                                                                                                                                                                                                                           | n = 989            | n = 55            | n = 34           | n = 49           | n = 51           | n = 110           | n = 34           | n = 37           | n = 31           | n = 132           | n = 74            | n = 286           | n = 96            |
| Yes                                                                                                                                                                                                                                                                       | 634 (64%)          | 13 (24%)          | 15 (44%)         | 27 (55%)         | 38 (75%)         | 41 (37%)          | 21 (62%)         | 36 (97%)         | 9 (29%)          | 106 (80%)         | 9 (12%)           | 266 (93%)         | 53 (55%)          |

|                                                                                                                                                  | Total           | Australia     | Brazil        | Canada        | China         | France         | Italy         | Mexico        | New Zealand   | Poland         | Sweden        | Turkey         | Ukraine        |
|--------------------------------------------------------------------------------------------------------------------------------------------------|-----------------|---------------|---------------|---------------|---------------|----------------|---------------|---------------|---------------|----------------|---------------|----------------|----------------|
| No, not more difficult                                                                                                                           | 258 (26%)       | 31 (56%)      | 16 (47%)      | 16 (33%)      | 4 (8%)        | 53 (48%)       | 11 (32%)      | 0 (0%)        | 13 (42%)      | 22 (17%)       | 46 (62%)      | 11 (4%)        | 35 (36%)       |
| No, there were no restrictive measures in place                                                                                                  | 72 (7%)         | 10 (18%)      | 2 (6%)        | 5 (10%)       | 0 (0%)        | 15 (14%)       | 1 (3%)        | 1 (3%)        | 9 (29%)       | 3 (2%)         | 18 (24%)      | 4 (1%)         | 4 (4%)         |
| Don't know                                                                                                                                       | 25 (3%)         | 1 (2%)        | 1 (3%)        | 1 (2%)        | 9 (18%)       | 1 (1%)         | 1 (3%)        | 0 (0%)        | 0 (0%)        | 1 (1%)         | 1 (1%)        | 5 (2%)         | 4 (4%)         |
| <b>When was skin-to-skin contact with your baby and one of the parents initiated (e.g. holding the baby on the chest, kangaroo mother care)?</b> |                 |               |               |               |               |                |               |               |               |                |               |                |                |
|                                                                                                                                                  | <b>n = 1044</b> | <b>n = 56</b> | <b>n = 33</b> | <b>n = 49</b> | <b>n = 52</b> | <b>n = 117</b> | <b>n = 35</b> | <b>n = 38</b> | <b>n = 31</b> | <b>n = 146</b> | <b>n = 75</b> | <b>n = 308</b> | <b>n = 104</b> |
| Immediately after birth                                                                                                                          | 65 (6%)         | 7 (13%)       | 1 (3%)        | 8 (16%)       | 2 (4%)        | 13 (11%)       | 1 (3%)        | 0 (0%)        | 5 (16%)       | 7 (5%)         | 11 (15%)      | 4 (1%)         | 6 (6%)         |
| On the first day                                                                                                                                 | 99 (9%)         | 14 (25%)      | 0 (0%)        | 7 (14%)       | 0 (0%)        | 43 (37%)       | 1 (3%)        | 0 (0%)        | 5 (16%)       | 4 (3%)         | 19 (25%)      | 4 (1%)         | 2 (2%)         |
| After the first day but during the first week                                                                                                    | 236 (23%)       | 23 (41%)      | 8 (24%)       | 21 (43%)      | 0 (0%)        | 45 (38%)       | 8 (23%)       | 3 (8%)        | 14 (45%)      | 36 (25%)       | 35 (47%)      | 17 (6%)        | 26 (25%)       |
| After the first week                                                                                                                             | 244 (23%)       | 11 (20%)      | 21 (64%)      | 13 (27%)      | 4 (8%)        | 14 (12%)       | 18 (51%)      | 13 (34%)      | 7 (23%)       | 32 (22%)       | 10 (13%)      | 60 (19%)       | 41 (39%)       |
| Not so far (If still in hospital)                                                                                                                | 156 (15%)       | 1 (2%)        | 2 (6%)        | 0 (0%)        | 44 (85%)      | 1 (1%)         | 0 (0%)        | 4 (11%)       | 0 (0%)        | 19 (13%)       | 0 (0%)        | 72 (23%)       | 13 (13%)       |
| Not during the time in the hospital if discharged                                                                                                | 244 (23%)       | 0 (0%)        | 1 (3%)        | 0 (0%)        | 2 (4%)        | 1 (1%)         | 7 (20%)       | 18 (47%)      | 0 (0%)        | 48 (33%)       | 0 (0%)        | 151 (49%)      | 16 (15%)       |
| <b>How often were you permitted to have skin-to-skin contact (kangaroo mother care) with your baby?</b>                                          |                 |               |               |               |               |                |               |               |               |                |               |                |                |
|                                                                                                                                                  | <b>n = 1043</b> | <b>n = 56</b> | <b>n = 32</b> | <b>n = 49</b> | <b>n = 52</b> | <b>n = 118</b> | <b>n = 34</b> | <b>n = 38</b> | <b>n = 31</b> | <b>n = 146</b> | <b>n = 75</b> | <b>n = 308</b> | <b>n = 104</b> |
| As often as I wanted                                                                                                                             | 302 (29%)       | 18 (32%)      | 14 (44%)      | 25 (51%)      | 0 (0%)        | 99 (84%)       | 8 (24%)       | 0 (0%)        | 16 (52%)      | 12 (8%)        | 63 (84%)      | 11 (4%)        | 36 (35%)       |
| At least once per day                                                                                                                            | 227 (22%)       | 31 (55%)      | 11 (34%)      | 21 (43%)      | 2 (4%)        | 15 (13%)       | 13 (38%)      | 12 (32%)      | 12 (39%)      | 31 (21%)       | 9 (12%)       | 43 (14%)       | 27 (26%)       |
| At least once per week                                                                                                                           | 64 (6%)         | 6 (11%)       | 3 (9%)        | 2 (4%)        | 0 (0%)        | 2 (2%)         | 3 (9%)        | 4 (11%)       | 3 (10%)       | 17 (12%)       | 3 (4%)        | 18 (6%)        | 3 (3%)         |
| Less than once per week                                                                                                                          | 77 (7%)         | 0 (0%)        | 1 (3%)        | 1 (2%)        | 2 (4%)        | 1 (1%)         | 4 (12%)       | 7 (18%)       | 0 (0%)        | 24 (16%)       | 0 (0%)        | 29 (9%)        | 8 (8%)         |
| Not so far                                                                                                                                       | 373 (36%)       | 1 (2%)        | 3 (9%)        | 0 (0%)        | 48 (92%)      | 1 (1%)         | 6 (18%)       | 15 (39%)      | 0 (0%)        | 62 (42%)       | 0 (0%)        | 207 (67%)      | 30 (29%)       |
| <b>Did medical/nursing staff involve you in the care of your baby (e.g. nappy changing, feeding, temperature taking)?</b>                        |                 |               |               |               |               |                |               |               |               |                |               |                |                |
|                                                                                                                                                  | <b>n = 989</b>  | <b>n = 55</b> | <b>n = 34</b> | <b>n = 49</b> | <b>n = 51</b> | <b>n = 110</b> | <b>n = 34</b> | <b>n = 37</b> | <b>n = 31</b> | <b>n = 131</b> | <b>n = 74</b> | <b>n = 287</b> | <b>n = 96</b>  |
| Yes, to a high degree                                                                                                                            | 438 (44%)       | 44 (80%)      | 15 (44%)      | 34 (69%)      | 4 (8%)        | 102 (93%)      | 22 (65%)      | 6 (16%)       | 27 (87%)      | 48 (37%)       | 67 (91%)      | 22 (8%)        | 47 (49%)       |
| Yes, to some degree                                                                                                                              | 180 (18%)       | 10 (18%)      | 10 (29%)      | 15 (31%)      | 3 (6%)        | 7 (6%)         | 10 (29%)      | 11 (30%)      | 4 (13%)       | 29 (22%)       | 7 (9%)        | 53 (18%)       | 21 (22%)       |
| No, not at all                                                                                                                                   | 364 (37%)       | 1 (2%)        | 9 (26%)       | 0 (0%)        | 40 (78%)      | 1 (1%)         | 2 (6%)        | 20 (54%)      | 0 (0%)        | 53 (40%)       | 0 (0%)        | 211 (74%)      | 27 (28%)       |
| Don't know                                                                                                                                       | 7 (1%)          | 0 (0%)        | 0 (0%)        | 0 (0%)        | 4 (8%)        | 0 (0%)         | 0 (0%)        | 0 (0%)        | 0 (0%)        | 1 (1%)         | 0 (0%)        | 1 (0%)         | 1 (1%)         |
| <b>Did medical/nursing staff involve your partner in the care of your baby?</b>                                                                  |                 |               |               |               |               |                |               |               |               |                |               |                |                |
|                                                                                                                                                  | <b>n = 990</b>  | <b>n = 55</b> | <b>n = 34</b> | <b>n = 49</b> | <b>n = 51</b> | <b>n = 110</b> | <b>n = 34</b> | <b>n = 37</b> | <b>n = 31</b> | <b>n = 131</b> | <b>n = 74</b> | <b>n = 288</b> | <b>n = 96</b>  |
| Yes, to a high degree                                                                                                                            | 274 (28%)       | 35 (64%)      | 4 (12%)       | 29 (59%)      | 3 (6%)        | 87 (79%)       | 19 (56%)      | 5 (14%)       | 18 (58%)      | 2 (2%)         | 63 (85%)      | 4 (1%)         | 5 (5%)         |
| Yes, to some degree                                                                                                                              | 121 (12%)       | 18 (33%)      | 9 (26%)       | 14 (29%)      | 4 (8%)        | 15 (14%)       | 8 (24%)       | 6 (16%)       | 6 (19%)       | 10 (8%)        | 7 (9%)        | 18 (6%)        | 6 (6%)         |
| No, not at all                                                                                                                                   | 567 (57%)       | 1 (2%)        | 19 (56%)      | 6 (12%)       | 39 (76%)      | 6 (5%)         | 6 (18%)       | 24 (65%)      | 5 (16%)       | 114 (87%)      | 3 (4%)        | 263 (91%)      | 81 (84%)       |
| Don't know                                                                                                                                       | 17 (2%)         | 0 (0%)        | 2 (6%)        | 0 (0%)        | 5 (10%)       | 0 (0%)         | 1 (3%)        | 1 (3%)        | 0 (0%)        | 4 (3%)         | 0 (0%)        | 1 (0%)         | 3 (3%)         |
| I don't have a partner                                                                                                                           | 11 (1%)         | 1 (2%)        | 0 (0%)        | 0 (0%)        | 0 (0%)        | 2 (2%)         | 0 (0%)        | 1 (3%)        | 2 (6%)        | 1 (1%)         | 1 (1%)        | 2 (1%)         | 1 (1%)         |

Blue: 95% confidence interval for difference in means: significantly higher than total

Green: 95% confidence interval for difference in means: significantly lower than total



## 298 **Nutrition and breastfeeding**

299  
300 In total, 89% of the respondents answered that their newborns were fed with breastmilk (breastfeeding  
301 or pumped milk), 22% received donor human milk and 34% were fed with infant formula (multiple  
302 response question; Supplementary Table S4). Initiation of breastfeeding was highly (50%) or somewhat  
303 (26%) encouraged by medical/nursing staff in most countries (Supplementary Table S4). Overall, 18%  
304 indicated that breastfeeding was not encouraged at all. This lack of encouragement was especially noted  
305 in Italy (32%), Poland and Turkey (>25%). However, newborns in Italy and Turkey were in over 90%  
306 of cases still exclusively or partly breastfed or provided with mother's own pumped/expressed  
307 breastmilk in the first weeks after birth (Supplementary Table S4).

308  
309 Also, the initiation of breastfeeding differed across countries. In Canada, first breastfeeding or provision  
310 of mother's own pumped/expressed breastmilk took place on the first day (57%) or after the first day  
311 but during the first week (37%). Likewise, in Australia, France and New Zealand, >50% of the  
312 respondents indicated that breastfeeding was initiated on the first day. In Mexico, 50% of the babies  
313 received first breastmilk after the first week. In Brazil, France, Italy and Ukraine more than 20% of the  
314 babies were first breastfed after the first week (Supplementary Table S4).

315  
316 In most countries, the respondents were allowed to bring expressed milk from home to the unit (76%).  
317 In Brazil, the milk had to be expressed at the hospital (71%). In New Zealand, Poland, Sweden and  
318 Ukraine more than 10% of the respondents indicated that they were not allowed to bring expressed milk  
319 from home to the unit.

## 321 **Health information and communication**

322  
323 Almost 90% of the respondents felt that they had received adequate general health information about  
324 their newborn during the hospital stay either to a high or some degree (Supplementary Table S5). Parents  
325 from Australia, Brazil, Canada, France, Italy, New Zealand and Sweden indicated to a high degree of  
326 having received general health information (>50%). While 84% of the respondents from China indicated  
327 that they received general health information to a high or to some degree, 10% answered that they did  
328 not receive any information.

329  
330 Almost 80% of the respondents received information about their newborn multiple times per day or once  
331 per day (Supplementary Table S5). General health information was mostly communicated to the parents  
332 in face-to-face meetings with medical/nursing staff (76%) or via phone calls (50%).

333  
334 Overall, more than 60% of the respondents from Italy felt to a high degree that they had received  
335 adequate information about how to protect themselves and their newborn from a COVID-19  
336 transmission. In China, 50% felt that they knew how to prevent transmission. A similar result could be  
337 observed at discharge from the hospital: in Italy and China where about 40% of the respondents indicated  
338 that they received adequate information about COVID-19 to a high degree. In Poland, almost 40% of  
339 the respondents felt they had not received any information about COVID-19 when being discharged  
340 from the hospital (Supplementary Table S5).

## 342 **Parents' mental health and support**

343  
344 More than three-quarters of the respondents indicated being worried about the COVID-19 situation  
345 during pregnancy. For 9% of the respondents, COVID-19 was not an issue, and 10% did not worry about  
346 the virus at all. While most respondents from Mexico worried about COVID-19 during pregnancy to a  
347 high degree (71%), this was only the case for 18% of the respondents from China (Figure 2A). After  
348 birth, 90% of the total respondents worried about the COVID-19 situation to a high or to some degree.  
349 Parents from Brazil worried to a high degree (94%), while more than half of the parents from China  
350 were not at all concerned (Figure 2A).

351  
352 Overall, 42% of the respondents felt they were adequately informed about mental health support to a  
353 high or some degree (Figure 2B). However, 38% felt they were not at all informed, and in 17% of the

cases there was no mental health support. The results show that proportions of having received adequate information were highest in Australia and lowest in Turkey and Mexico. The absence of mental health support was highest in Ukraine and Poland (34%). If support was offered, most parents received psychological counselling (29%) and help from a social worker (19%). In total, 48% of the respondents answered that no support was offered (Supplementary Table S6).

[Figure 2 here]

## DISCUSSION

The COVID-19 pandemic has disrupted healthcare systems, and further challenged the already inadequate application of an IFCDC approach in many countries worldwide. Measures to stem virus transmission have resulted in (additional) restrictions affecting preterm, sick, and low birthweight infants, one of the most vulnerable groups of patients [16,18]. Highlighting the importance of IFCDC and by taking a patient/parent-centred approach, this study has identified parents' perceptions to different policy measures across 12 countries, with severe implications for both IFCDC as well as the health outcomes of vulnerable infants born during the pandemic [24–26]. In what follows, we will reflect upon the key findings that emerged from our multi-country research, covering data from Australia, Brazil, Canada, China, France, Italy, Mexico, New Zealand, Poland, Sweden, Turkey, and Ukraine.

Perinatal care was impacted by the pandemic and respective restrictions, in particular with regard to having support persons present during both pregnancy-related appointments and birth. Our findings have shown that while some countries have hardly restricted the presence of accompanying persons during birth (such as Australia, New Zealand, Canada and Sweden), in many other countries it was not permitted to have a support person present (as for example in >60% in China, Ukraine, Turkey, and >85% in Poland and Mexico). This restriction finally leaves the person giving birth without any emotional, informational, and practical support from a person of trust. In contrast with such pandemic-related restrictions, previous research showed that having a support person present fulfilling these tasks facilitates non-pharmacological pain relief as well as bonding, and improves maternal well-being [25,26,32,33], which clearly highlights the benefits as well as the importance of labour companionship. In its recommendations on “Intrapartum care for a positive childbirth experience”, the WHO advocates for a companion of choice for all women throughout labour and childbirth [34] also during the pandemic [35]. Thus, global health agendas do no longer exclusively focus on the reduction of birth complications, yet they have expanded their scope and have started to emphasise the importance of maternal and newborn health and well-being, and that mother and child should also thrive and enjoy their full potential of health [33]. Partners should therefore be allowed access to enable a respectful childbirth experience, yet this opportunity is too often being withheld as our research showed.

This study also revealed shortcomings regarding presence and involvement of family members while the newborn needed special/intensive care, which confirms results of similar studies [14,18,20,29,36]. As we have learned from our findings [16], restrictions were implemented and, besides some exceptions (e.g. in Australia, Canada, France, New Zealand and Sweden), in seven out of 12 countries, partly only the mother was allowed to be present with the newborn. The other parent, however, was less likely to have access with strict access restrictions e.g. in Poland and Ukraine, and siblings as well as other family members were hardly ever allowed in the neonatal intensive care unit in any country. Most importantly, our results showed that there are countries (e.g. Turkey and China) where nobody (not even father or mother) was allowed to be with the hospitalised infant. Thus, extremely strict access measures following a severe separation policy between parents and their vulnerable infant were implemented. Parental-infant bonding, however, can only take place if the parents are present and given the opportunity to care for their newborn [30,37–39]. Not including parents in caring, planning, and participation in decision-making processes pertaining to their newborn, will less likely establish feelings of competency and a healthy parent-child relationship [37]. Research shows that if the parents feel empowered to care for the child, maternal stress and anxiety can be reduced and hospital stays may be shorter [40,41]. Despite this, involving parents and seeing them as primary caregivers also depends on the mind-set of healthcare professionals [42].

410  
411 Separating family members, and in particular parents from their newborns has severe consequences for  
412 the care provision and health outcomes of the vulnerable infant, for example due to limited possibilities  
413 for skin-to-skin care and KMC [18,39]. For almost one quarter of the total respondents, skin-to-skin  
414 contact with the newborn was not initiated during the time in the hospital, with particular strict measures  
415 in Mexico and Turkey, even though the benefits of practices such as KMC are undisputed [42–47]. The  
416 positive influence on developmental outcomes far outweighs the potential risk of death due to COVID-  
417 19 as research highlights [27]. Survival benefits of immediate KMC seem to be higher compared to  
418 those of conventional care in an incubator or a radiant warmer, as a recent randomised control trial  
419 conducted in low-resource hospital shows [47], making further research also in well-resourced settings  
420 necessary. These findings highlight that newborns should not be separated from their parents; our study  
421 unfortunately shows that the separation of parents and their newborn is (still) common practice as a  
422 minimum during the pandemic.

423  
424 Even though a large majority of parents felt adequately informed about their newborn, almost 40% of  
425 the total respondents were not involved at all in the care of their baby (e.g. nappy changing, feeding,  
426 temperature taking) and almost 60% indicated that their partner was not involved in caring for the  
427 newborn, leaving them without any practice when the infant was discharged. Strong country-specific  
428 differences show that the involvement of the parents was encouraged more in Australia, Canada, France,  
429 Italy, New Zealand and Sweden in comparison to China, Poland, Turkey and Ukraine. Moreover, the  
430 implemented measures during COVID-19 made parental presence and interaction with the baby more  
431 difficult for parents in Mexico, Poland and Turkey than in Australia, France, New Zealand and Sweden.  
432 Although we could observe considerable country-specific differences on specific elements of IFCDC,  
433 overall, some countries such as New Zealand and Sweden, performed uniformly well, while other  
434 countries fell behind. These differences can also be interpreted as a prioritisation of a holistic IFCDC  
435 approach in some countries which might have already put a greater focus on this care approach in the  
436 pre-pandemic phase, however, further research is necessary.

437  
438 In contrast to parental presence and skin-to-skin contact, breastfeeding does not seem to have been  
439 impacted to the same degree. Despite various implemented restrictions, our data did not suggest that the  
440 ability to breastfeed or breastfeeding in general was discouraged by nursing staff across the 12 countries.  
441 Although about 30% of the parents from Italy and Mexico indicated that breastfeeding was not  
442 encouraged at all by nursing staff – against the current WHO recommendation [48] – this did not  
443 influence the number of infants being breastfed or provided with mother’s own pumped or expressed  
444 breastmilk in the first weeks after birth (>90%). It has been outlined that globally, breastfeeding has not  
445 been prioritised and encouraged during the pandemic, e.g. due to early discharge and limited lactation  
446 support, with possible negative implications for its initiation [28,49,50]. Our data, however, implies that  
447 breastfeeding, as one element of IFCDC, was somewhat less affected by the restrictions, at least in the  
448 hospital. However, this study does not show the long-term trend and potential continuation of  
449 breastfeeding, e.g. also in case of early discharge which frequently occurred during the pandemic [17].

450  
451 Having a newborn requiring special/intensive care is in itself a stressful situation for parents, and even  
452 more so during a pandemic. Preterm birth can be associated with a number of adverse maternal  
453 psychological outcomes, among others anxiety and psychological distress [51,52]. The COVID-19  
454 pandemic, as an additional contributing factor to emotional distress and with an increased risk for  
455 psychiatric illness [53] and postnatal depression [54], makes parents of a preterm, sick or low  
456 birthweight infant increasingly vulnerable to developing mental health issues. Our results show that the  
457 COVID-19 situation was especially worrisome for parents from Brazil, Canada and Mexico after the  
458 birth of their baby, and at the same time these parents, together with those from Turkey, did not feel  
459 well informed about mental health and support. Early intervention is however important, and mental  
460 health support should be offered as early as possible and already during the hospital stay [51]. In an  
461 emergency situation, such as the COVID-19 pandemic, the focus on health and early supportive  
462 measures should be even more pronounced.

463  
464 This study has several strengths that merit attention, and contextual factors that need to be outlined. The  
465 cross-country approach, data collection in 12 countries and extensive outreach allowed us to acquire



1  
2  
3 466 valuable and in-depth insights into parents' perspectives and experiences regarding IFCDC during the  
4 467 first year of the COVID-19 pandemic. Pre-testing of the questionnaire reduced methodological  
5 468 inaccuracies and ensured that data was collected in a sensitive way. The findings comprehensively  
6 469 reflect the parent perspective across multiple countries giving insights into country-specific differences  
7 470 which are worthwhile to derive suggestions for improvements on the global and country-specific policy  
8 471 level.

9 472  
10 473 The study has limitations that need to be acknowledged. Due to limited access and outreach possibilities  
11 474 in our network, we were not able to collect a representative set of data in particularly African and  
12 475 Southeast-Asian countries. In many countries in these regions, parent representative organisations do  
13 476 either not exist or do not have a strong lobby, which is in itself an important finding and worthwhile to  
14 477 investigate further. Setting up the study in an online format furthermore bears the risk of selection bias  
15 478 [55], and response rates could not be calculated as information on non-responders, in particular, during  
16 479 the pandemic state is not available. Due to missing demographics on neonates receiving special/intensive  
17 480 care in the different countries, we were unable to assess the representativeness of the sample. We are  
18 481 aware that participants completed the survey at different care stages (i.e. during/after hospitalisation)  
19 482 with a potential impact on the parents' perceived experiences. It also needs to be acknowledged that  
20 483 different countries, cultures, settings, income levels, political- and health care systems, as well as the  
21 484 individual countries' contribution to the full sample comprise a potential risk of confounding bias.  
22 485 Moreover, the study reflects a point in time and we are unable to compare our findings to pre-pandemic  
23 486 contexts. We acknowledge that strong variation has already existed between and within countries in the  
24 487 field of newborn care, which is not exclusively related to the COVID-19 pandemic. Additionally, the  
25 488 respective pandemic situation, geographical, climatic and environmental aspects, as well as containment  
26 489 strategies vary between (and sometimes even within) countries and might have influenced on the one  
27 490 hand, the COVID-19 related policy approach and on the other hand, the results in the respective  
28 491 countries [56]. This has to be acknowledged when comparing results between countries and interpreting  
29 492 potential implications of the COVID-19 incidence on IFCDC on a country level.  
30  
31  
32  
33

## 34 495 **CONCLUSION**

35 496  
36 497 To the best of our knowledge, this is the first multi-country comparison of parents' experiences  
37 498 regarding special/intensive care for newborns during the first year of the COVID-19 pandemic on a  
38 499 country level. The pandemic has challenged healthcare systems leading to disruptions in the care of the  
39 500 most vulnerable groups of patients, namely preterm, sick, and low birthweight infants. Pandemic related  
40 501 restrictions are certainly necessary to prevent and reduce transmission of SARS-CoV-2. However,  
41 502 restrictions in parental presence and the missing possibility for skin-to-skin contact, together with  
42 503 lacking mental health support are global health drawbacks threatening newborn survival, quality of life  
43 504 of survivors and their families, and hinder the achievement of the 2030 Development Agenda. This study  
44 505 provides unique opportunities for public health experts, policy makers, and healthcare professionals  
45 506 alike to learn from country-specific differences and in-depth insights and consequences from different  
46 507 approaches. It is essential to listen to and acknowledge parents' voices and experiences. Immediate  
47 508 action is necessary, including the reconsideration of implemented restrictions to strengthen an IFCDC  
48 509 approach, both during and in the absence of a global crisis.  
49  
50

## 51 512 **Acknowledgements**

52 513  
53 514 We thank all study respondents and very much appreciate their time and invaluable commitment. We  
54 515 also thank all representatives of national parent organisations and experts, who have supported  
55 516 translation and dissemination of the survey.  
56 517

## 57 518 **Collaborators**

58 519 COVID-19 Zero Separation Collaborative Group (in alphabetical order): Mandy Daly (NIDCAP, USA  
59 520 and Irish Neonatal Health Alliance, Ireland), Camilla Gizzi (UENPS, Department of Pediatrics - Sandro  
60 521 Pertini Hospital, Rome, Italy), Agnes van den Hoogen (ESPR, Geneva, Switzerland, COINN, Utrecht

1  
2  
3 522 University and UMC Utrecht, The Netherlands), Gigi Khonyongwa-Fernandez (NICU Parent Network  
4 523 (NPN), USA), Mary Kinney (University of the Western Cape, South Africa), Kerstin Mondry (European  
5 524 Foundation for the Care of Newborn Infants (EFCNI), Munich, Germany), Corrado Moretti (UENPS,  
6 525 Emeritus Consultant in Paediatrics, Policlinico Umberto I, Sapienza University of Rome, Italy), Ilknur  
7 526 Okay (El Bebek Gül Bebek Derneği, Turkey), Kylie Pussell (Miracle Babies Foundation, Australia),  
8 527 Charles C. Roehr (ESPR, Geneva, Switzerland, and National Perinatal Epidemiology Unit, Nuffield  
9 528 Department of Population Health, University of Oxford, UK), Eleni Vavouraki (Ilitominon, Greece),  
10 529 Karen Walker (COINN, Royal Prince Alfred Hospital, University of Sydney, Australia)  
11 530

### 531 **Contributors**

12  
13 532 The EFCNI scientific team conceptualised the study and set up the online-survey under the lead of JK  
14 533 and with critical feedback by LZ, SM, and the members of the COVID-19 Zero Separation Collaborative  
15 534 Group. The COVID-19 Zero Separation Collaborative Group substantially supported the recruitment of  
16 535 respondents. CRP and JH were responsible for the statistical analysis, with feedback by JK, AW, and  
17 536 LZ. JK, CRP, and JH drafted the manuscript which was shared with and continuously reviewed by AW,  
18 537 SM, and LZ. JK, JH, CRP, AW, LZ, and SM interpreted and had full access to the data. All authors  
19 538 critically revised and have read and approved the final manuscript.  
20 539

### 21 540 **Funding**

22  
23 541 During the conduct of this project, EFCNI was supported by Novartis Pharma AG with an earmarked  
24 542 donation for this study. The research was independently conducted by the authors of this paper. The  
25 543 donor had no role in any step of the research project.  
26 544

### 27 545 **Competing interests**

28 546 The authors report an earmarked donation from Novartis Pharma AG during the conduct of the study.  
29 547

### 30 548 **Patient consent for publication**

31 549 Not required.  
32 550

### 33 551 **Ethics approval**

34 552 The Ethics Committee of Maastricht UMC+, the Netherlands, has waived the need for ethical approval  
35 553 for this study (MECT 2020-1336).  
36 554

### 37 555 **Data availability statement**

38 556 Data are available from the corresponding author on reasonable request.  
39 557  
40 558

### 41 559 **Figures**

42 560 Figure 1. Distribution of respondents by country and parental presence with newborn per country (A),  
43 561 presence of support persons during pregnancy-related appointments (B), and labour companionship  
44 562 (C)

45 563 Figure 2. Country-specific proportions on A. the concern about the COVID-19 situation and B. mental  
46 564 health support  
47  
48  
49  
50  
51  
52  
53  
54  
55  
56  
57  
58  
59  
60

1  
2  
3 565 **REFERENCES**  
4 566

- 567 1. United Nations Statistics Division. Goal 3: Ensure healthy lives and promote well-being for all at  
568 all ages. 2021. Available from: <https://unstats.un.org/sdgs/report/2017/goal-03/>
- 569 2. Coll-Seck A, Clark H, Bahl R, Peterson S, Costello A, Lucas T. Framing an agenda for children  
570 thriving in the SDG era: a WHO–UNICEF–Lancet Commission on Child Health and Wellbeing.  
571 *The Lancet*. 2019 Jan;393(10167):109–12.
- 572 3. Semaan A, Audet C, Huysmans E, Afolabi B, Assarag B, Banke-Thomas A, et al. Voices from the  
573 frontline: findings from a thematic analysis of a rapid online global survey of maternal and  
574 newborn health professionals facing the COVID-19 pandemic. *BMJ Glob Health*. 2020  
575 Jun;5(6):e002967.
- 576 4. Shapira G, Ahmed T, Drouard SHP, Amor Fernandez P, Kandpal E, Nzelu C, et al. Disruptions in  
577 maternal and child health service utilization during COVID-19: analysis from eight sub-Saharan  
578 African countries. *Health Policy and Planning*. 2021 Aug 12;36(7):1140–51.
- 579 5. Shapira G, de Walque D, Friedman J. How many infants may have died in low-income and  
580 middle-income countries in 2020 due to the economic contraction accompanying the COVID-19  
581 pandemic? Mortality projections based on forecasted declines in economic growth. *BMJ Open*.  
582 2021;11(9).
- 583 6. Liu L, Oza S, Hogan D, Chu Y, Perin J, Zhu J, et al. Global, regional, and national causes of  
584 under-5 mortality in 2000–15: an updated systematic analysis with implications for the  
585 Sustainable Development Goals. *The Lancet*. 2016 Dec;388(10063):3027–35.
- 586 7. Althabe F, Howson CP, Kinney M, Lawn J, World Health Organization. Born too soon: the global  
587 action report on preterm birth. 2012. Available from:  
588 <http://www.who.int/pmnch/media/news/2012/201204%5Fborntoosoon-report.pdf>
- 589 8. WHO. Causes of newborn mortality and morbidity in the European Region. Available from:  
590 [https://www.euro.who.int/en/health-topics/Life-stages/maternal-and-newborn-health/causes-of-](https://www.euro.who.int/en/health-topics/Life-stages/maternal-and-newborn-health/causes-of-newborn-mortality-and-morbidity-in-the-european-region)  
591 [newborn-mortality-and-morbidity-in-the-european-region](https://www.euro.who.int/en/health-topics/Life-stages/maternal-and-newborn-health/causes-of-newborn-mortality-and-morbidity-in-the-european-region)
- 592 9. Chawanpaiboon S, Vogel JP, Moller A-B, Lumbiganon P, Petzold M, Hogan D, et al. Global,  
593 regional, and national estimates of levels of preterm birth in 2014: a systematic review and  
594 modelling analysis. *The Lancet Global Health*. 2019 Jan;7(1):e37–46.
- 595 10. Lehtonen L, Gimeno A, Parra-Llorca A, Vento M. Early neonatal death: A challenge worldwide.  
596 *Semin Fetal Neonatal Med*. 2017;22(3):153–60.
- 597 11. EACH European Association for Children in Hospital. The EACH Charter with annotations.  
598 EACH; 2016. Available from: [www.each-for-sick-children.org](http://www.each-for-sick-children.org)
- 599 12. UN Commission on Human Rights. Convention on the Rights of the Child, E/CN.4/RES/1990/74.  
600 General Assembly; 1990.
- 601 13. McAdams RM. Family separation during COVID-19. *Pediatr Res*. 2021 Apr;89(5):1317–8.
- 602 14. Bembich S, Tripani A, Mastromarino S, Di Risio G, Castelpietra E, Risso FM. Parents  
603 experiencing NICU visit restrictions due to COVID-19 pandemic. *Acta Paediatr*. 2020 Oct  
604 28;apa.15620.
- 605 15. Muniraman H, Ali M, Cawley P, Hillyer J, Heathcote A, Ponnusamy V, et al. Parental perceptions  
606 of the impact of neonatal unit visitation policies during COVID-19 pandemic. *bmjpo*. 2020  
607 Nov;4(1):e000899.
- 608 16. Kostenzer J, Hoffmann J, von Rosenstiel-Pulver C, Walsh A, Zimmermann L, Mader S, et al.  
609 Neonatal care during the COVID-19 pandemic – a global survey of parents’ experiences regarding  
610 infant and family-centred developmental care. *EClinicalMedicine*. 2021;

- 1  
2  
3 611 17. Rao SPN, Minckas N, Medvedev MM, Gathara D, Y N P, Seifu Estifanos A, et al. Small and sick  
4 612 newborn care during the COVID-19 pandemic: global survey and thematic analysis of healthcare  
5 613 providers' voices and experiences. *BMJ Glob Health*. 2021 Mar;6(3):e004347.
- 6  
7 614 18. Litmanovitz I, Silberstein D, Butler S, Vittner D. Care of hospitalized infants and their families  
8 615 during the COVID-19 pandemic: an international survey. *J Perinatol*. 2021 Mar 23; Available  
9 616 from: <http://www.nature.com/articles/s41372-021-00960-8>
- 10  
11 617 19. Harding C, Aloysius A, Bell N, Edney S, Gordon Z, Lewis H, et al. Reflections on COVID -19  
12 618 and the potential impact on preterm infant feeding and speech, language and communication  
13 619 development. *Journal of Neonatal Nursing*. 2021 Jun;27(3):220–2.
- 14 620 20. Green J, Staff L, Bromley P, Jones L, Petty J. The implications of face masks for babies and  
15 621 families during the COVID-19 pandemic: A discussion paper. *Journal of Neonatal Nursing*. 2021  
16 622 Feb;27(1):21–5.
- 17  
18 623 21. European Foundation for the Care of Newborn Infants. European Standards of Care for Newborn  
19 624 Health: Project Report. EFCNI; 2018. Available from: [www.efcni.org/wp-](http://www.efcni.org/wp-content/uploads/2018/11/2018_11_16_ESCNH_Report_final.pdf)  
20 625 [content/uploads/2018/11/2018\\_11\\_16\\_ESCNH\\_Report\\_final.pdf](http://www.efcni.org/wp-content/uploads/2018/11/2018_11_16_ESCNH_Report_final.pdf)
- 21  
22 626 22. Mushtaq A, Kazi F. Family-centred care in the NICU. *The Lancet Child & Adolescent Health*.  
23 627 2019 May;3(5):295–6.
- 24 628 23. Damhuis G, König K, Westrup B, Kuhn P, Daly M, Bertocelli N, et al. European Standards of  
25 629 Care for Newborn Health: Infant- and family-centred developmental care. European Foundation  
26 630 for the Care of Newborn Infants (EFCNI); 2018. Available from: [https://newborn-health-](https://newborn-health-standards.org/wp-content/uploads/2019/10/TEG_IFCDC_complete.pdf)  
27 631 [standards.org/wp-content/uploads/2019/10/TEG\\_IFCDC\\_complete.pdf](https://newborn-health-standards.org/wp-content/uploads/2019/10/TEG_IFCDC_complete.pdf)
- 28  
29 632 24. Scala M, Marchman VA, Brignoni-Pérez E, Morales MC, Travis KE. Impact of the COVID-19  
30 633 pandemic on developmental care practices for infants born preterm. *Pediatrics*; 2020 Nov.  
31 634 Available from: <http://medrxiv.org/lookup/doi/10.1101/2020.11.25.20238956>
- 32  
33 635 25. Darcey-Mahoney A, White RD, Velasquez A, Barrett TS, Clark RH, Ahmad KA. Impact of  
34 636 Restrictions on Parental Presence in Neonatal Intensive Care Units Related to COVID-19.  
35 637 *Pediatrics*; 2020 Jul. Available from: <http://medrxiv.org/lookup/doi/10.1101/2020.07.22.20158949>
- 36 638 26. Salvatore CM, Han J-Y, Acker KP, Tiwari P, Jin J, Brandler M, et al. Neonatal management and  
37 639 outcomes during the COVID-19 pandemic: an observation cohort study. *The Lancet Child &*  
38 640 *Adolescent Health*. 2020 Oct;4(10):721–7.
- 39  
40 641 27. Minckas N, Medvedev MM, Adejuyigbe EA, Brotherton H, Chellani H, Estifanos AS, et al.  
41 642 Preterm care during the COVID-19 pandemic: A comparative risk analysis of neonatal deaths  
42 643 averted by kangaroo mother care versus mortality due to SARS-CoV-2 infection.  
43 644 *EClinicalMedicine*. 2021 Feb;100733.
- 44  
45 645 28. Brown A, Shenker N. Experiences of breastfeeding during COVID-19: Lessons for future  
46 646 practical and emotional support. *Matern Child Nutr*. 2021 Jan;17(1). Available from:  
47 647 <https://onlinelibrary.wiley.com/doi/10.1111/mcn.13088>
- 48 648 29. van Veenendaal NR, Deierl A, Bacchini F, O'Brien K, Franck LS, The International Steering  
49 649 Committee for Family Integrated Care. Supporting parents as essential care partners in neonatal  
50 650 units during the SARS-CoV-2 pandemic. *Acta Paediatrica*. 2021 Mar 26;apa.15857.
- 51  
52 651 30. BLISS for babies born premature or sick. Locked out: the impact of COVID-19 on neonatal care.  
53 652 2021. Available from: [https://s3.eu-west-2.amazonaws.com/files.bliss.org.uk/images/Locked-out-](https://s3.eu-west-2.amazonaws.com/files.bliss.org.uk/images/Locked-out-the-impact-of-COVID-19-on-neonatal-care-final.pdf?mtime=20210519184749&focal=none)  
54 653 [the-impact-of-COVID-19-on-neonatal-care-final.pdf?mtime=20210519184749&focal=none](https://s3.eu-west-2.amazonaws.com/files.bliss.org.uk/images/Locked-out-the-impact-of-COVID-19-on-neonatal-care-final.pdf?mtime=20210519184749&focal=none)
- 55  
56 654 31. Eysenbach G. Improving the quality of Web surveys: the Checklist for Reporting Results of  
57 655 Internet E-Surveys (CHERRIES). *J Med Internet Res*. 2004 Sep 29;6(3):e34.
- 58 656 32. Bohren MA, Berger BO, Munthe-Kaas H, Tunçalp Ö. Perceptions and experiences of labour  
59 657 companionship: a qualitative evidence synthesis. *Cochrane Effective Practice and Organisation of*  
60 658 *Care Group*, editor. *Cochrane Database of Systematic Reviews*. 2019 Mar 18; Available from:  
659 <http://doi.wiley.com/10.1002/14651858.CD012449.pub2>



- 1  
2  
3 660 33. Shakibazadeh E, Namadian M, Bohren M, Vogel J, Rashidian A, Nogueira Pileggi V, et al.  
4 661 Respectful care during childbirth in health facilities globally: a qualitative evidence synthesis.  
5 662 BJOG: Int J Obstet Gy. 2018 Jul;125(8):932–42.  
6  
7 663 34. WHO. WHO recommendations Intrapartum care for a positive childbirth experience -  
8 664 Transforming care of women and babies for improved health and well-being. WHO: Geneva,  
9 665 Switzerland; 2018.  
10 666 35. World Health Organization. Coronavirus disease (COVID-19): Pregnancy and childbirth. 2020.  
11 667 Available from: [www.who.int/news-room/q-a-detail/coronavirus-disease-covid-19-pregnancy-](http://www.who.int/news-room/q-a-detail/coronavirus-disease-covid-19-pregnancy-and-childbirth)  
12 668 [and-childbirth](http://www.who.int/news-room/q-a-detail/coronavirus-disease-covid-19-pregnancy-and-childbirth)  
13  
14 669 36. Cena L, Biban P, Janos J, Lavelli M, Langfus J, Tsai A, et al. The Collateral Impact of COVID-19  
15 670 Emergency on Neonatal Intensive Care Units and Family-Centered Care: Challenges and  
16 671 Opportunities. *Front Psychol*. 2021 Feb 24;12:630594.  
17  
18 672 37. Boronat N, Escarti A, Vento M. We want our families in the NICU! *Pediatr Res*. 2020  
19 673 Sep;88(3):354–5.  
20 674 38. Gooding JS, Cooper LG, Blaine AI, Franck LS, Howse JL, Berns SD. Family support and family-  
21 675 centered care in the neonatal intensive care unit: origins, advances, impact. *Semin Perinatol*. 2011  
22 676 Feb;35(1):20–8.  
23  
24 677 39. Bergman NJ. Birth practices: Maternal-neonate separation as a source of toxic stress. *Birth*  
25 678 *Defects Research*. 2019 Sep;111(15):1087–109.  
26  
27 679 40. Saenz P, Cerda M, Diaz JL, Yi P, Gorba M, Boronat N, et al. Psychological stress of parents of  
28 680 preterm infants enrolled in an early discharge programme from the neonatal intensive care unit: a  
29 681 prospective randomised trial. *Archives of Disease in Childhood - Fetal and Neonatal Edition*.  
30 682 2009 Mar 1;94(2):F98–104.  
31 683 41. Ortenstrand A, Westrup B, Brostrom EB, Sarman I, Akerstrom S, Brune T, et al. The Stockholm  
32 684 Neonatal Family Centered Care Study: Effects on Length of Stay and Infant Morbidity. *Pediatrics*  
33 685 2010 Feb 1;125(2):e278–85.  
34  
35 686 42. Oude Maatman SM, Bohlin K, Lilliesköld S, Garberg HT, Uitewaal-Poslawky I, Kars MC, et al.  
36 687 Factors Influencing Implementation of Family-Centered Care in a Neonatal Intensive Care Unit.  
37 688 *Front Pediatr*. 2020 May 6;8:222.  
38  
39 689 43. Lv B, Gao X, Sun J, Li T, Liu Z, Zhu L, et al. Family-Centered Care Improves Clinical Outcomes  
40 690 of Very-Low-Birth-Weight Infants: A Quasi-Experimental Study. *Front Pediatr*. 2019 Apr  
41 691 12;7:138.  
42 692 44. Ding X, Zhu L, Zhang R, Wang L, Wang T-T, Latour JM. Effects of family-centred care  
43 693 interventions on preterm infants and parents in neonatal intensive care units: A systematic review  
44 694 and meta-analysis of randomised controlled trials. *Australian Critical Care*. 2019 Jan;32(1):63–75.  
45  
46 695 45. Bhutta ZA, Das JK, Bahl R, Lawn JE, Salam RA, Paul VK, et al. Can available interventions end  
47 696 preventable deaths in mothers, newborn babies, and stillbirths, and at what cost? *The Lancet*. 2014  
48 697 Jul;384(9940):347–70.  
49  
50 698 46. Mazumder S, Taneja S, Dube B, Bhatia K, Ghosh R, Shekhar M, et al. Effect of community-  
51 699 initiated kangaroo mother care on survival of infants with low birthweight: a randomised  
52 700 controlled trial. *The Lancet*. 2019 Nov;394(10210):1724–36.  
53 701 47. WHO Immediate KMC Study Group. Immediate “Kangaroo Mother Care” and Survival of Infants  
54 702 with Low Birth Weight. *N Engl J Med*. 2021 May 27;384(21):2028–38.  
55  
56 703 48. WHO. Breastfeeding and COVID-19. 2020. Available from:  
57 704 [https://www.who.int/publications/i/item/WHO-2019-nCoV-Sci\\_Brief-Breastfeeding-2020.1](https://www.who.int/publications/i/item/WHO-2019-nCoV-Sci_Brief-Breastfeeding-2020.1)  
58  
59 705 49. Spatz DL, Davanzo R, Müller JA, Powell R, Rigourd V, Yates A, et al. Promoting and Protecting  
60 706 Human Milk and Breastfeeding in a COVID-19 World. *Front Pediatr*. 2021 Feb 3;8:633700.

- 1  
2  
3 707 50. Rollins N, Minckas N, Jehan F, Lodha R, Raiten D, Thorne C, et al. A public health approach for  
4 708 deciding policy on infant feeding and mother–infant contact in the context of COVID-19. *The*  
5 709 *Lancet Global Health*. 2021 Apr;9(4):e552–7.
- 6  
7 710 51. Misund AR, Nerdrum P, Diseth TH. Mental health in women experiencing preterm birth. *BMC*  
8 711 *Pregnancy Childbirth*. 2014 Dec;14(1):263.
- 9  
10 712 52. Simon S, Moreyra A, Wharton E, Dowtin LL, Borkovi TC, Armer E, et al. Prevention of  
11 713 posttraumatic stress disorder in mothers of preterm infants using trauma-focused group therapy:  
12 714 Manual development and evaluation. *Early Human Development*. 2021 Mar;154:105282.
- 13 715 53. Pfefferbaum B, North CS. Mental Health and the Covid-19 Pandemic. *N Engl J Med*. 2020 Aug  
14 716 6;383(6):510–2.
- 15  
16 717 54. Chmielewska B, Barratt I, Townsend R, Kalafat E, van der Meulen J, Gurol-Urganci I, et al.  
17 718 Effects of the COVID-19 pandemic on maternal and perinatal outcomes: a systematic review and  
18 719 meta-analysis. *The Lancet Global Health*. 2021 Mar;S2214109X21000796.
- 19  
20 720 55. Blumenberg C, Barros AJD. Response rate differences between web and alternative data  
21 721 collection methods for public health research: a systematic review of the literature. *Int J Public*  
22 722 *Health*. 2018 Jul;63(6):765–73.
- 23 723 56. Murgante B, Borruso G, Balletto G, Castiglia P, Dettori M. Why Italy First? Health, Geographical  
24 724 and Planning Aspects of the COVID-19 Outbreak. *Sustainability*. 2020 Jun 22;12(12):5064.
- 25  
26  
27  
28  
29  
30  
31  
32  
33  
34  
35  
36  
37  
38  
39  
40  
41  
42  
43  
44  
45  
46  
47  
48  
49  
50  
51  
52  
53  
54  
55  
56  
57  
58  
59  
60

A. Participants per country (n=1148)

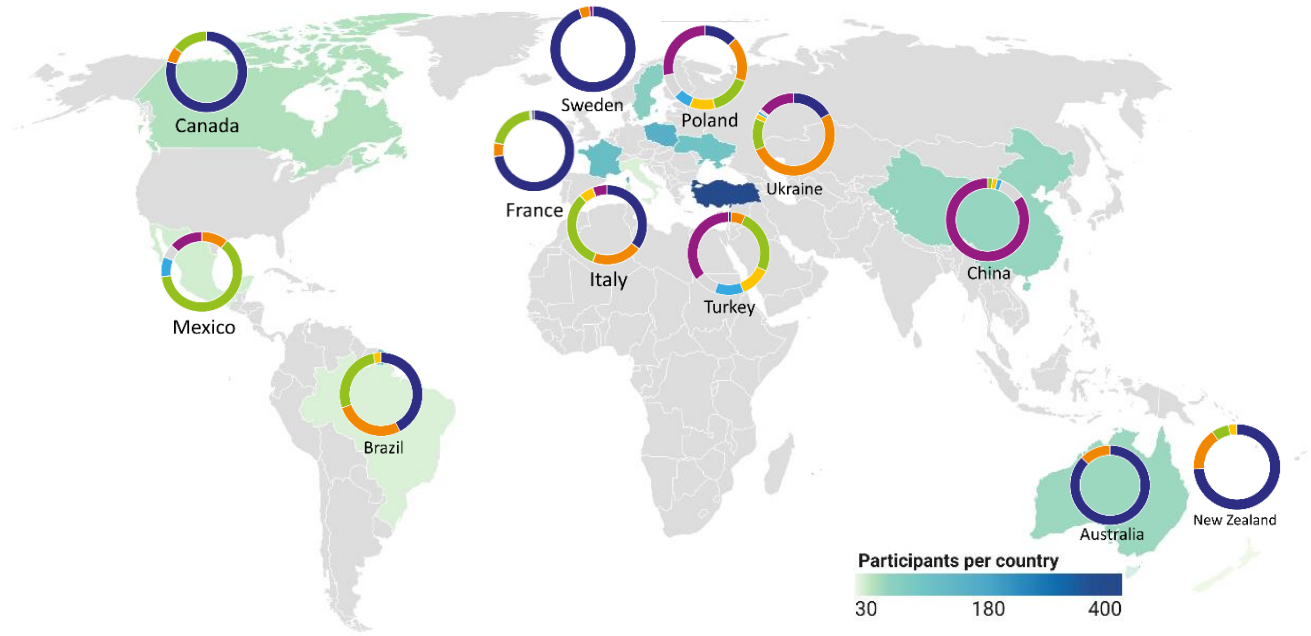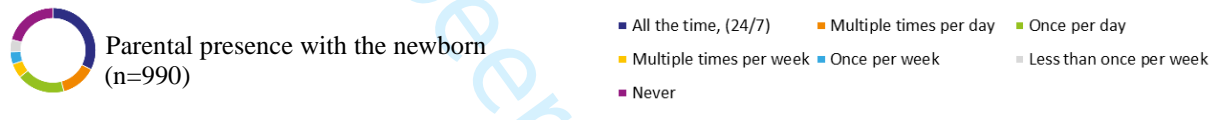

B. Presence of another person during pregnancy-related appointments (n=1044)

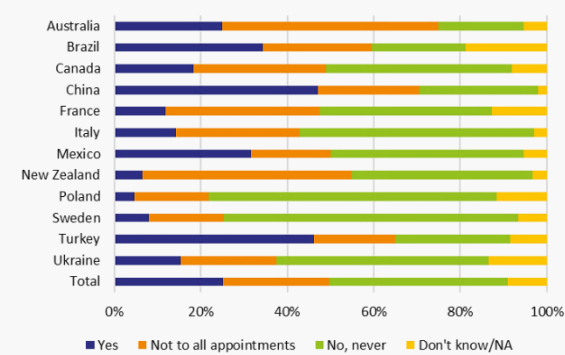

C. Presence of another person during birth (n=1045)

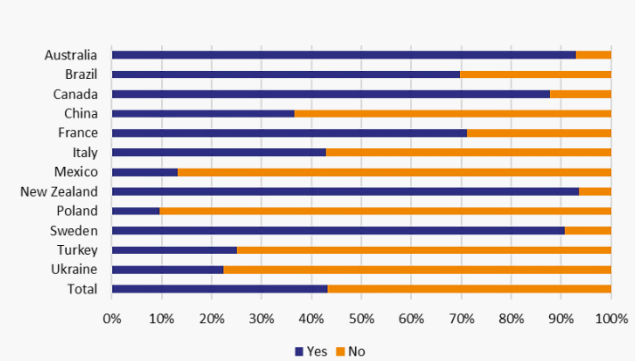

Figure 1. Distribution of respondents by country and parental presence with newborn per country (A), presence of support persons during pregnancy-related appointments (B), and labour companionship (C)

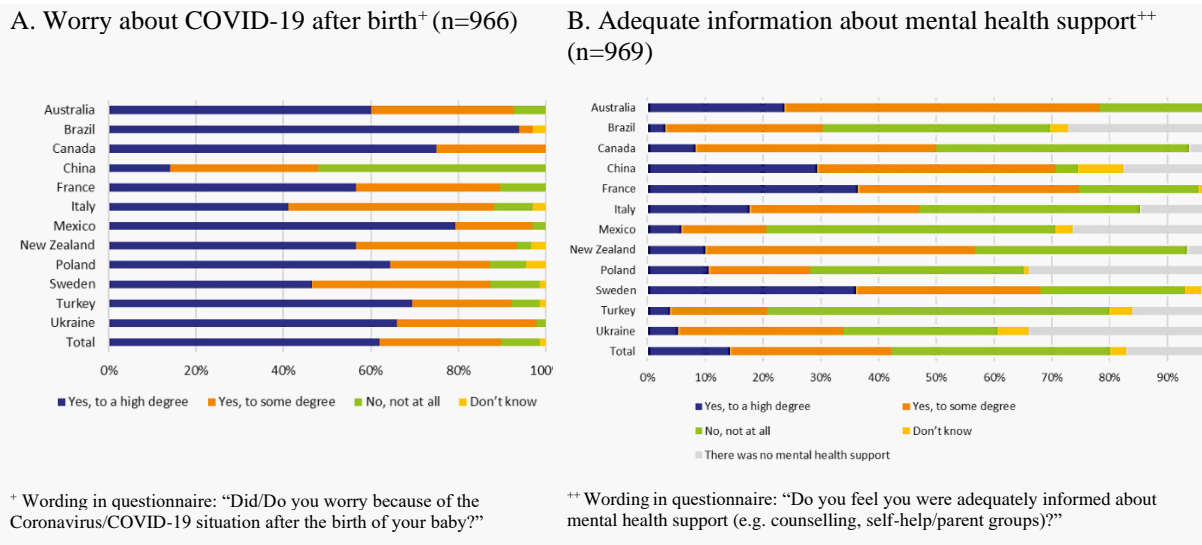

Figure 2. Country-specific proportions on A. the concern about the COVID-19 situation and B. mental health support



1  
2  
3 **SUPPLEMENTARY MATERIAL**  
4

5 **Supplementary Table S1**

6 Title: Baseline and COVID-19 related characteristics of participants  
7

8 **Supplementary Table S2**

9 Title: Prenatal care and birth  
10

11 **Supplementary Table S3**

12 Title: Presence with the newborn  
13

14 **Supplementary Table S4**

15 Title: Information on breastfeeding/nutrition  
16

17 **Supplementary Table S5**

18 Title: Information on health communication  
19

20 **Supplementary Table S6**

21 Title: Information on mental health status  
22  
23  
24  
25  
26  
27  
28  
29  
30  
31  
32  
33  
34  
35  
36  
37  
38  
39  
40  
41  
42  
43  
44  
45  
46  
47  
48  
49  
50  
51  
52  
53  
54  
55  
56  
57  
58  
59  
60

Supplementary Table S1. Baseline and COVID-19 related characteristics of participants

|                                                   | Total           | Australia     | Brazil        | Canada        | China         | France         | Italy         | Mexico        | New Zealand   | Poland         | Sweden        | Turkey         | Ukraine        |
|---------------------------------------------------|-----------------|---------------|---------------|---------------|---------------|----------------|---------------|---------------|---------------|----------------|---------------|----------------|----------------|
| <b>Age of respondent (years)</b>                  |                 |               |               |               |               |                |               |               |               |                |               |                |                |
|                                                   | <b>n = 1146</b> | <b>n = 58</b> | <b>n = 38</b> | <b>n = 52</b> | <b>n = 60</b> | <b>n = 125</b> | <b>n = 38</b> | <b>n = 40</b> | <b>n = 31</b> | <b>n = 160</b> | <b>n = 78</b> | <b>n = 357</b> | <b>n = 109</b> |
| <20                                               | 5 (0%)          | 1 (2%)        | 0 (0%)        | 0 (0%)        | 1 (2%)        | 1 (1%)         | 0 (0%)        | 1 (3%)        | 0 (0%)        | 0 (0%)         | 0 (0%)        | 1 (0%)         | 0 (0%)         |
| 20-29                                             | 468 (41%)       | 14 (24%)      | 15 (39%)      | 15 (29%)      | 16 (27%)      | 40 (32%)       | 2 (5%)        | 18 (45%)      | 15 (48%)      | 70 (44%)       | 24 (31%)      | 205 (57%)      | 34 (31%)       |
| 30-39                                             | 608 (53%)       | 39 (67%)      | 20 (53%)      | 30 (58%)      | 38 (63%)      | 78 (62%)       | 30 (79%)      | 18 (45%)      | 15 (48%)      | 84 (53%)       | 46 (59%)      | 136 (38%)      | 74 (68%)       |
| >40                                               | 65 (6%)         | 4 (7%)        | 3 (8%)        | 7 (13%)       | 5 (8%)        | 6 (5%)         | 6 (16%)       | 3 (8%)        | 1 (3%)        | 6 (4%)         | 8 (10%)       | 15 (4%)        | 1 (1%)         |
| <b>Gestational age at birth (weeks)</b>           |                 |               |               |               |               |                |               |               |               |                |               |                |                |
|                                                   | <b>n = 1107</b> | <b>n = 58</b> | <b>n = 37</b> | <b>n = 49</b> | <b>n = 53</b> | <b>n = 123</b> | <b>n = 36</b> | <b>n = 41</b> | <b>n = 31</b> | <b>n = 154</b> | <b>n = 75</b> | <b>n = 344</b> | <b>n = 106</b> |
| Early preterm: <28                                | 270 (24%)       | 22 (38%)      | 9 (24%)       | 15 (31%)      | 18 (34%)      | 40 (33%)       | 9 (25%)       | 4 (10%)       | 6 (19%)       | 40 (26%)       | 23 (31%)      | 67 (19%)       | 17 (16%)       |
| Very preterm: 28-<br><32                          | 389 (35%)       | 10 (17%)      | 16 (43%)      | 14 (29%)      | 29 (55%)      | 36 (29%)       | 10 (28%)      | 20 (49%)      | 7 (23%)       | 48 (31%)       | 27 (36%)      | 140 (41%)      | 32 (30%)       |
| Moderate to late<br>preterm: 32-<br><37           | 412 (37%)       | 20 (34%)      | 12 (32%)      | 20 (41%)      | 6 (11%)       | 43 (35%)       | 15 (42%)      | 15 (37%)      | 15 (48%)      | 64 (42%)       | 19 (25%)      | 131 (38%)      | 52 (49%)       |
| Term: 37-42                                       | 36 (3%)         | 6 (10%)       | 0 (0%)        | 0 (0%)        | 0 (0%)        | 4 (3%)         | 2 (6%)        | 2 (5%)        | 3 (10%)       | 2 (1%)         | 6 (8%)        | 6 (2%)         | 5 (5%)         |
| <b>Multiple pregnancy</b>                         |                 |               |               |               |               |                |               |               |               |                |               |                |                |
|                                                   | <b>n = 1112</b> | <b>n = 58</b> | <b>n = 37</b> | <b>n = 49</b> | <b>n = 54</b> | <b>n = 124</b> | <b>n = 36</b> | <b>n = 41</b> | <b>n = 31</b> | <b>n = 154</b> | <b>n = 75</b> | <b>n = 344</b> | <b>n = 109</b> |
| Yes                                               | 180 (16%)       | 12 (21%)      | 7 (19%)       | 6 (12%)       | 18 (33%)      | 14 (11%)       | 5 (14%)       | 4 (10%)       | 3 (10%)       | 14 (9%)        | 16 (21%)      | 65 (19%)       | 16 (15%)       |
| No                                                | 932 (84%)       | 46 (79%)      | 30 (81%)      | 43 (88%)      | 36 (67%)      | 110 (89%)      | 31 (86%)      | 37 (90%)      | 28 (90%)      | 140 (91%)      | 59 (79%)      | 279 (81%)      | 93 (85%)       |
| <b>Birth mode</b>                                 |                 |               |               |               |               |                |               |               |               |                |               |                |                |
|                                                   | <b>n = 1111</b> | <b>n = 58</b> | <b>n = 37</b> | <b>n = 50</b> | <b>n = 54</b> | <b>n = 124</b> | <b>n = 36</b> | <b>n = 41</b> | <b>n = 30</b> | <b>n = 153</b> | <b>n = 75</b> | <b>n = 344</b> | <b>n = 109</b> |
| Vaginal birth                                     | 301 (27%)       | 18 (31%)      | 6 (16%)       | 22 (44%)      | 24 (44%)      | 62 (50%)       | 14 (39%)      | 6 (15%)       | 6 (20%)       | 42 (27%)       | 28 (37%)      | 38 (11%)       | 35 (32%)       |
| C-section                                         | 804 (72%)       | 39 (67%)      | 31 (84%)      | 28 (56%)      | 29 (54%)      | 62 (50%)       | 21 (58%)      | 35 (85%)      | 24 (80%)      | 111 (73%)      | 47 (63%)      | 304 (88%)      | 73 (67%)       |
| Both (e.g. in case of<br>multiple pregnancy)      | 6 (1%)          | 1 (2%)        | 0 (0%)        | 0 (0%)        | 1 (2%)        | 0 (0%)         | 1 (3%)        | 0 (0%)        | 0 (0%)        | 0 (0%)         | 0 (0%)        | 2 (1%)         | 1 (1%)         |
| <b>Birth weight of the baby (grams)</b>           |                 |               |               |               |               |                |               |               |               |                |               |                |                |
|                                                   | <b>n = 1110</b> | <b>n = 58</b> | <b>n = 37</b> | <b>n = 50</b> | <b>n = 54</b> | <b>n = 124</b> | <b>n = 36</b> | <b>n = 41</b> | <b>n = 31</b> | <b>n = 154</b> | <b>n = 75</b> | <b>n = 342</b> | <b>n = 108</b> |
| <1000                                             | 290 (26%)       | 20 (34%)      | 10 (27%)      | 18 (36%)      | 15 (28%)      | 45 (36%)       | 14 (39%)      | 6 (15%)       | 8 (26%)       | 35 (23%)       | 27 (36%)      | 78 (23%)       | 14 (13%)       |
| 1000-1500                                         | 373 (34%)       | 14 (24%)      | 15 (41%)      | 11 (22%)      | 28 (52%)      | 28 (23%)       | 5 (14%)       | 18 (44%)      | 7 (23%)       | 57 (37%)       | 18 (24%)      | 130 (38%)      | 42 (39%)       |
| >1500-2500                                        | 374 (34%)       | 16 (28%)      | 12 (32%)      | 15 (30%)      | 10 (19%)      | 45 (36%)       | 16 (44%)      | 13 (32%)      | 10 (32%)      | 53 (34%)       | 19 (25%)      | 120 (35%)      | 45 (42%)       |
| >2500                                             | 71 (6%)         | 8 (14%)       | 0 (0%)        | 6 (12%)       | 1 (2%)        | 6 (5%)         | 1 (3%)        | 4 (10%)       | 6 (19%)       | 9 (6%)         | 10 (13%)      | 14 (4%)        | 6 (6%)         |
| Don't know the<br>birth weight                    | 2 (0%)          | 0 (0%)        | 0 (0%)        | 0 (0%)        | 0 (0%)        | 0 (0%)         | 0 (0%)        | 0 (0%)        | 0 (0%)        | 0 (0%)         | 1 (1%)        | 0 (0%)         | 1 (1%)         |
| <b>Duration of special/intensive care (weeks)</b> |                 |               |               |               |               |                |               |               |               |                |               |                |                |
|                                                   | <b>n = 1112</b> | <b>n = 58</b> | <b>n = 37</b> | <b>n = 50</b> | <b>n = 54</b> | <b>n = 124</b> | <b>n = 36</b> | <b>n = 41</b> | <b>n = 31</b> | <b>n = 154</b> | <b>n = 75</b> | <b>n = 344</b> | <b>n = 108</b> |
| <1                                                | 81 (7%)         | 3 (5%)        | 0 (0%)        | 5 (10%)       | 5 (9%)        | 4 (3%)         | 4 (11%)       | 3 (7%)        | 1 (3%)        | 10 (6%)        | 4 (5%)        | 13 (4%)        | 29 (27%)       |
| 1-3                                               | 251 (23%)       | 10 (17%)      | 5 (14%)       | 11 (22%)      | 17 (31%)      | 24 (19%)       | 11 (31%)      | 7 (17%)       | 3 (10%)       | 29 (19%)       | 20 (27%)      | 73 (21%)       | 41 (38%)       |
| >3-5                                              | 277 (25%)       | 12 (21%)      | 10 (27%)      | 2 (4%)        | 17 (31%)      | 61 (49%)       | 3 (8%)        | 10 (24%)      | 9 (29%)       | 43 (28%)       | 13 (17%)      | 83 (24%)       | 14 (13%)       |
| >5                                                | 503 (45%)       | 33 (57%)      | 22 (59%)      | 32 (64%)      | 15 (28%)      | 35 (28%)       | 18 (50%)      | 21 (51%)      | 18 (58%)      | 72 (47%)       | 38 (51%)      | 175 (51%)      | 24 (22%)       |

Supplementary Table S1. Baseline and COVID-19 related characteristics of participants (*continued*)

|                                                                                                                                                                                                                                    | Total           | Australia     | Brazil        | Canada        | China         | France         | Italy         | Mexico        | New Zealand   | Poland         | Sweden        | Turkey         | Ukraine        |
|------------------------------------------------------------------------------------------------------------------------------------------------------------------------------------------------------------------------------------|-----------------|---------------|---------------|---------------|---------------|----------------|---------------|---------------|---------------|----------------|---------------|----------------|----------------|
| <b>Different countries and regions have been addressing the threat of Coronavirus/COVID-19 in different ways. Which of the following best describes the situation in your country/region around the time of your baby's birth?</b> |                 |               |               |               |               |                |               |               |               |                |               |                |                |
|                                                                                                                                                                                                                                    | <b>n = 1071</b> | <b>n = 58</b> | <b>n = 33</b> | <b>n = 49</b> | <b>n = 52</b> | <b>n = 118</b> | <b>n = 35</b> | <b>n = 41</b> | <b>n = 30</b> | <b>n = 151</b> | <b>n = 75</b> | <b>n = 322</b> | <b>n = 107</b> |
| No major concern                                                                                                                                                                                                                   | 49 (5%)         | 0 (0%)        | 3 (9%)        | 4 (8%)        | 14 (27%)      | 6 (5%)         | 1 (3%)        | 2 (5%)        | 0 (0%)        | 1 (1%)         | 1 (1%)        | 14 (4%)        | 3 (3%)         |
| Precautions                                                                                                                                                                                                                        | 137 (13%)       | 6 (10%)       | 2 (6%)        | 4 (8%)        | 30 (58%)      | 12 (10%)       | 2 (6%)        | 5 (12%)       | 5 (17%)       | 12 (8%)        | 5 (7%)        | 44 (14%)       | 10 (9%)        |
| Social distancing                                                                                                                                                                                                                  | 325 (30%)       | 17 (29%)      | 8 (24%)       | 14 (29%)      | 7 (13%)       | 38 (32%)       | 9 (26%)       | 7 (17%)       | 6 (20%)       | 48 (32%)       | 69 (92%)      | 80 (25%)       | 22 (21%)       |
| Lockdown                                                                                                                                                                                                                           | 438 (41%)       | 31 (53%)      | 16 (48%)      | 26 (53%)      | 1 (2%)        | 16 (14%)       | 16 (46%)      | 27 (66%)      | 18 (60%)      | 73 (48%)       | 0 (0%)        | 147 (46%)      | 67 (63%)       |
| Quarantine                                                                                                                                                                                                                         | 122 (11%)       | 4 (7%)        | 4 (12%)       | 1 (2%)        | 0 (0%)        | 46 (39%)       | 7 (20%)       | 0 (0%)        | 1 (3%)        | 17 (11%)       | 0 (0%)        | 37 (11%)       | 5 (5%)         |
| <b>Have you tested positive for Coronavirus/COVID-19?</b>                                                                                                                                                                          |                 |               |               |               |               |                |               |               |               |                |               |                |                |
|                                                                                                                                                                                                                                    | <b>n = 1084</b> | <b>n = 58</b> | <b>n = 35</b> | <b>n = 50</b> | <b>n = 53</b> | <b>n = 121</b> | <b>n = 35</b> | <b>n = 41</b> | <b>n = 31</b> | <b>n = 150</b> | <b>n = 75</b> | <b>n = 326</b> | <b>n = 109</b> |
| Yes                                                                                                                                                                                                                                | 27 (2%)         | 1 (2%)        | 1 (3%)        | 0 (0%)        | 0 (0%)        | 1 (1%)         | 1 (3%)        | 5 (12%)       | 0 (0%)        | 1 (1%)         | 4 (5%)        | 8 (2%)         | 5 (5%)         |
| No                                                                                                                                                                                                                                 | 1057 (98%)      | 57 (98%)      | 34 (97%)      | 50 (100%)     | 53 (100%)     | 120 (99%)      | 34 (97%)      | 36 (88%)      | 31 (100%)     | 149 (99%)      | 71 (95%)      | 318 (98%)      | 104 (95%)      |
| <b>Has your partner tested positive for Coronavirus/COVID-19?</b>                                                                                                                                                                  |                 |               |               |               |               |                |               |               |               |                |               |                |                |
|                                                                                                                                                                                                                                    | <b>n = 1086</b> | <b>n = 57</b> | <b>n = 35</b> | <b>n = 50</b> | <b>n = 53</b> | <b>n = 121</b> | <b>n = 36</b> | <b>n = 41</b> | <b>n = 31</b> | <b>n = 152</b> | <b>n = 75</b> | <b>n = 326</b> | <b>n = 109</b> |
| Yes                                                                                                                                                                                                                                | 25 (2%)         | 1 (2%)        | 2 (6%)        | 0 (0%)        | 0 (0%)        | 1 (1%)         | 1 (3%)        | 5 (12%)       | 0 (0%)        | 0 (0%)         | 1 (1%)        | 8 (2%)         | 6 (6%)         |
| No                                                                                                                                                                                                                                 | 1039 (96%)      | 56 (98%)      | 27 (77%)      | 50 (100%)     | 53 (100%)     | 117 (97%)      | 35 (97%)      | 36 (88%)      | 31 (100%)     | 147 (97%)      | 74 (99%)      | 312 (96%)      | 101 (93%)      |
| Don't know                                                                                                                                                                                                                         | 22 (2%)         | 0 (0%)        | 6 (17%)       | 0 (0%)        | 0 (0%)        | 3 (2%)         | 0 (0%)        | 0 (0%)        | 0 (0%)        | 5 (3%)         | 0 (0%)        | 6 (2%)         | 2 (2%)         |
| <b>Has your baby tested positive for Coronavirus/COVID-19?</b>                                                                                                                                                                     |                 |               |               |               |               |                |               |               |               |                |               |                |                |
|                                                                                                                                                                                                                                    | <b>n = 1087</b> | <b>n = 58</b> | <b>n = 35</b> | <b>n = 50</b> | <b>n = 53</b> | <b>n = 121</b> | <b>n = 36</b> | <b>n = 41</b> | <b>n = 31</b> | <b>n = 152</b> | <b>n = 75</b> | <b>n = 326</b> | <b>n = 109</b> |
| Yes                                                                                                                                                                                                                                | 5 (0%)          | 1 (2%)        | 0 (0%)        | 0 (0%)        | 0 (0%)        | 0 (0%)         | 1 (3%)        | 1 (2%)        | 0 (0%)        | 0 (0%)         | 0 (0%)        | 1 (0%)         | 1 (1%)         |
| No                                                                                                                                                                                                                                 | 1035 (95%)      | 57 (98%)      | 31 (89%)      | 50 (100%)     | 50 (94%)      | 113 (93%)      | 35 (97%)      | 39 (95%)      | 31 (100%)     | 145 (95%)      | 74 (99%)      | 303 (93%)      | 107 (98%)      |
| Don't know                                                                                                                                                                                                                         | 47 (4%)         | 0 (0%)        | 4 (11%)       | 0 (0%)        | 3 (6%)        | 8 (7%)         | 0 (0%)        | 1 (2%)        | 0 (0%)        | 7 (5%)         | 1 (1%)        | 22 (7%)        | 1 (1%)         |

Supplementary Table S2. Prenatal care and birth

|                                                                                                                                             | Total           | Australia     | Brazil        | Canada        | China         | France         | Italy         | Mexico        | New Zealand   | Poland         | Sweden        | Turkey         | Ukraine        |
|---------------------------------------------------------------------------------------------------------------------------------------------|-----------------|---------------|---------------|---------------|---------------|----------------|---------------|---------------|---------------|----------------|---------------|----------------|----------------|
| <b>How was the timing of pregnancy-related appointments affected, if at all, by Coronavirus/Covid-19?</b>                                   |                 |               |               |               |               |                |               |               |               |                |               |                |                |
|                                                                                                                                             | <b>n = 1045</b> | <b>n = 56</b> | <b>n = 33</b> | <b>n = 48</b> | <b>n = 51</b> | <b>n = 118</b> | <b>n = 35</b> | <b>n = 38</b> | <b>n = 31</b> | <b>n = 147</b> | <b>n = 75</b> | <b>n = 308</b> | <b>n = 105</b> |
| It was done as usual                                                                                                                        | 117 (11%)       | 7 (13%)       | 3 (9%)        | 7 (15%)       | 1 (2%)        | 8 (7%)         | 4 (11%)       | 4 (11%)       | 2 (6%)        | 12 (8%)        | 24 (32%)      | 40 (13%)       | 5 (5%)         |
| No appointments took place                                                                                                                  | 510 (49%)       | 23 (41%)      | 21 (64%)      | 22 (46%)      | 49 (96%)      | 70 (59%)       | 20 (57%)      | 10 (26%)      | 3 (10%)       | 75 (51%)       | 30 (40%)      | 147 (48%)      | 40 (38%)       |
| Fewer appointments took place                                                                                                               | 47 (4%)         | 0 (0%)        | 2 (6%)        | 1 (2%)        | 0 (0%)        | 10 (8%)        | 1 (3%)        | 4 (11%)       | 2 (6%)        | 9 (6%)         | 3 (4%)        | 8 (3%)         | 7 (7%)         |
| Other                                                                                                                                       | 371 (36%)       | 26 (46%)      | 7 (21%)       | 18 (38%)      | 1 (2%)        | 30 (25%)       | 10 (29%)      | 20 (53%)      | 24 (77%)      | 51 (35%)       | 18 (24%)      | 113 (37%)      | 53 (50%)       |
| <b>If you were permitted to have another person present with you during birth, for how long was this person permitted to stay with you?</b> |                 |               |               |               |               |                |               |               |               |                |               |                |                |
|                                                                                                                                             | <b>n = 481</b>  | <b>n = 51</b> | <b>n = 24</b> | <b>n = 44</b> | <b>n = 20</b> | <b>n = 85</b>  | <b>n = 18</b> | <b>n = 6</b>  | <b>n = 29</b> | <b>n = 14</b>  | <b>n = 71</b> | <b>n = 96</b>  | <b>n = 23</b>  |
| For the entire labour                                                                                                                       | 367 (76%)       | 46 (90%)      | 23 (96%)      | 38 (86%)      | 17 (85%)      | 67 (79%)       | 7 (39%)       | 1 (17%)       | 25 (86%)      | 9 (64%)        | 59 (83%)      | 60 (63%)       | 15 (65%)       |
| For a part of it                                                                                                                            | 114 (24%)       | 5 (10%)       | 1 (4%)        | 6 (14%)       | 3 (15%)       | 18 (21%)       | 11 (61%)      | 5 (83%)       | 4 (14%)       | 5 (36%)        | 12 (17%)      | 36 (38%)       | 8 (35%)        |

Supplementary Table S3. Presence with the newborn

|                                                                                                                                       | Total              | Australia        | Brazil           | Canada           | China            | France            | Italy            | Mexico           | New Zealand      | Poland            | Sweden            | Turkey            | Ukraine           |
|---------------------------------------------------------------------------------------------------------------------------------------|--------------------|------------------|------------------|------------------|------------------|-------------------|------------------|------------------|------------------|-------------------|-------------------|-------------------|-------------------|
| <b>Were you permitted to touch your baby in the incubator or bed?</b>                                                                 |                    |                  |                  |                  |                  |                   |                  |                  |                  |                   |                   |                   |                   |
|                                                                                                                                       | <b>n = 1047</b>    | <b>n = 56</b>    | <b>n = 33</b>    | <b>n = 49</b>    | <b>n = 52</b>    | <b>n = 118</b>    | <b>n = 35</b>    | <b>n = 38</b>    | <b>n = 31</b>    | <b>n = 147</b>    | <b>n = 75</b>     | <b>n = 308</b>    | <b>n = 105</b>    |
| Yes                                                                                                                                   | 754 (72%)          | 55 (98%)         | 33 (100%)        | 49 (100%)        | 4 (8%)           | 116 (98%)         | 32 (91%)         | 31 (82%)         | 31 (100%)        | 119 (81%)         | 74 (99%)          | 124 (40%)         | 86 (82%)          |
| No                                                                                                                                    | 293 (28%)          | 1 (2%)           | 0 (0%)           | 0 (0%)           | 48 (92%)         | 2 (2%)            | 3 (9%)           | 7 (18%)          | 0 (0%)           | 28 (19%)          | 1 (1%)            | 184 (60%)         | 19 (18%)          |
| <b>How often were you permitted to touch your baby in the incubator or bed?</b>                                                       |                    |                  |                  |                  |                  |                   |                  |                  |                  |                   |                   |                   |                   |
|                                                                                                                                       | <b>n = 1046</b>    | <b>n = 56</b>    | <b>n = 34</b>    | <b>n = 49</b>    | <b>n = 52</b>    | <b>n = 118</b>    | <b>n = 35</b>    | <b>n = 38</b>    | <b>n = 31</b>    | <b>n = 146</b>    | <b>n = 74</b>     | <b>n = 308</b>    | <b>n = 105</b>    |
| As often as I wanted                                                                                                                  | 491 (47%)          | 46 (82%)         | 29 (85%)         | 42 (86%)         | 0 (0%)           | 110 (93%)         | 20 (57%)         | 5 (13%)          | 31 (100%)        | 54 (37%)          | 72 (97%)          | 20 (6%)           | 62 (59%)          |
| At least once per day                                                                                                                 | 174 (17%)          | 9 (16%)          | 5 (15%)          | 7 (14%)          | 2 (4%)           | 6 (5%)            | 11 (31%)         | 20 (53%)         | 0 (0%)           | 33 (23%)          | 2 (3%)            | 57 (19%)          | 22 (21%)          |
| At least once per week                                                                                                                | 43 (4%)            | 1 (2%)           | 0 (0%)           | 0 (0%)           | 0 (0%)           | 0 (0%)            | 0 (0%)           | 3 (8%)           | 0 (0%)           | 15 (10%)          | 0 (0%)            | 24 (8%)           | 0 (0%)            |
| Less than once per week                                                                                                               | 73 (7%)            | 0 (0%)           | 0 (0%)           | 0 (0%)           | 2 (4%)           | 0 (0%)            | 2 (6%)           | 3 (8%)           | 0 (0%)           | 22 (15%)          | 0 (0%)            | 37 (12%)          | 7 (7%)            |
| Not so far                                                                                                                            | 265 (25%)          | 0 (0%)           | 0 (0%)           | 0 (0%)           | 48 (92%)         | 2 (2%)            | 2 (6%)           | 7 (18%)          | 0 (0%)           | 22 (15%)          | 0 (0%)            | 170 (55%)         | 14 (13%)          |
| <b>Were sleeping facilities provided so you could stay with the baby (24/7)?</b>                                                      |                    |                  |                  |                  |                  |                   |                  |                  |                  |                   |                   |                   |                   |
|                                                                                                                                       | <b>n = 984</b>     | <b>n = 55</b>    | <b>n = 33</b>    | <b>n = 48</b>    | <b>n = 51</b>    | <b>n = 110</b>    | <b>n = 34</b>    | <b>n = 37</b>    | <b>n = 31</b>    | <b>n = 129</b>    | <b>n = 74</b>     | <b>n = 286</b>    | <b>n = 96</b>     |
| Yes, sleeping facilities were provided next to my baby in the unit                                                                    | 179 (18%)          | 5 (9%)           | 4 (12%)          | 15 (31%)         | 5 (10%)          | 49 (45%)          | 4 (12%)          | 0 (0%)           | 1 (3%)           | 18 (14%)          | 41 (55%)          | 11 (4%)           | 26 (27%)          |
| Yes, sleeping facilities were provided outside the unit (e.g. in an apartment house nearby, in another unit)                          | 125 (13%)          | 5 (9%)           | 0 (0%)           | 6 (13%)          | 2 (4%)           | 8 (7%)            | 9 (26%)          | 0 (0%)           | 4 (13%)          | 18 (14%)          | 30 (41%)          | 11 (4%)           | 32 (33%)          |
| No, sleeping facilities were not provided                                                                                             | 680 (69%)          | 45 (82%)         | 29 (88%)         | 27 (56%)         | 44 (86%)         | 53 (48%)          | 21 (62%)         | 37 (100%)        | 26 (84%)         | 93 (72%)          | 3 (4%)            | 264 (92%)         | 38 (40%)          |
| <b>Which alternatives to being present were provided with your baby receiving special/intensive care? (multiple answers possible)</b> |                    |                  |                  |                  |                  |                   |                  |                  |                  |                   |                   |                   |                   |
|                                                                                                                                       | <b>n = 982</b>     | <b>n = 55</b>    | <b>n = 34</b>    | <b>n = 48</b>    | <b>n = 51</b>    | <b>n = 109</b>    | <b>n = 34</b>    | <b>n = 37</b>    | <b>n = 29</b>    | <b>n = 130</b>    | <b>n = 72</b>     | <b>n = 287</b>    | <b>n = 96</b>     |
| <b>Sum of multiple answers</b>                                                                                                        | <b>1122 (114%)</b> | <b>57 (104%)</b> | <b>39 (115%)</b> | <b>63 (131%)</b> | <b>59 (116%)</b> | <b>123 (113%)</b> | <b>35 (103%)</b> | <b>38 (103%)</b> | <b>30 (103%)</b> | <b>155 (119%)</b> | <b>100 (139%)</b> | <b>318 (111%)</b> | <b>105 (109%)</b> |
| Photos                                                                                                                                | 309 (32%)          | 6 (11%)          | 12 (35%)         | 12 (25%)         | 14 (27%)         | 28 (26%)          | 10 (29%)         | 5 (14%)          | 4 (14%)          | 69 (53%)          | 22 (31%)          | 114 (40%)         | 13 (14%)          |
| Livestream                                                                                                                            | 42 (4%)            | 6 (11%)          | 1 (3%)           | 5 (10%)          | 4 (8%)           | 1 (1%)            | 0 (0%)           | 1 (3%)           | 0 (0%)           | 16 (12%)          | 6 (8%)            | 0 (0%)            | 2 (2%)            |
| Recorded video                                                                                                                        | 74 (8%)            | 0 (0%)           | 2 (6%)           | 6 (13%)          | 3 (6%)           | 3 (3%)            | 1 (3%)           | 0 (0%)           | 0 (0%)           | 16 (12%)          | 12 (17%)          | 24 (8%)           | 7 (7%)            |
| Video calls                                                                                                                           | 52 (5%)            | 2 (4%)           | 2 (6%)           | 9 (19%)          | 1 (2%)           | 6 (6%)            | 1 (3%)           | 1 (3%)           | 5 (17%)          | 5 (4%)            | 14 (19%)          | 5 (2%)            | 1 (1%)            |
| None                                                                                                                                  | 542 (55%)          | 39 (71%)         | 19 (56%)         | 23 (48%)         | 26 (51%)         | 64 (59%)          | 20 (59%)         | 29 (78%)         | 20 (69%)         | 35 (27%)          | 30 (42%)          | 159 (55%)         | 78 (81%)          |
| Other                                                                                                                                 | 103 (11%)          | 4 (7%)           | 3 (9%)           | 8 (17%)          | 11 (22%)         | 21 (19%)          | 3 (9%)           | 2 (5%)           | 1 (3%)           | 14 (11%)          | 16 (22%)          | 16 (6%)           | 4 (4%)            |

Supplementary Table S4. Information on breastfeeding/nutrition

|                                                                                                                          | Total              | Australia        | Brazil           | Canada           | China            | France            | Italy            | Mexico           | New Zealand      | Poland            | Sweden            | Turkey            | Ukraine           |
|--------------------------------------------------------------------------------------------------------------------------|--------------------|------------------|------------------|------------------|------------------|-------------------|------------------|------------------|------------------|-------------------|-------------------|-------------------|-------------------|
| <b>Was initiation of breastfeeding encouraged by medical/nursing staff?</b>                                              |                    |                  |                  |                  |                  |                   |                  |                  |                  |                   |                   |                   |                   |
|                                                                                                                          | <b>n = 1024</b>    | <b>n = 55</b>    | <b>n = 34</b>    | <b>n = 49</b>    | <b>n = 51</b>    | <b>n = 115</b>    | <b>n = 34</b>    | <b>n = 38</b>    | <b>n = 31</b>    | <b>n = 140</b>    | <b>n = 75</b>     | <b>n = 299</b>    | <b>n = 103</b>    |
| Yes, highly encouraged                                                                                                   | 515 (50%)          | 48 (87%)         | 23 (68%)         | 30 (61%)         | 50 (98%)         | 78 (68%)          | 13 (38%)         | 20 (53%)         | 23 (74%)         | 52 (37%)          | 35 (47%)          | 95 (32%)          | 48 (47%)          |
| Yes, somewhat encouraged                                                                                                 | 265 (26%)          | 5 (9%)           | 6 (18%)          | 12 (24%)         | 0 (0%)           | 24 (21%)          | 9 (26%)          | 15 (39%)         | 5 (16%)          | 41 (29%)          | 31 (41%)          | 82 (27%)          | 35 (34%)          |
| No, not encouraged at all                                                                                                | 189 (18%)          | 1 (2%)           | 4 (12%)          | 5 (10%)          | 0 (0%)           | 10 (9%)           | 11 (32%)         | 3 (8%)           | 0 (0%)           | 39 (28%)          | 9 (12%)           | 89 (30%)          | 18 (17%)          |
| Don't know                                                                                                               | 55 (5%)            | 1 (2%)           | 1 (3%)           | 2 (4%)           | 1 (2%)           | 3 (3%)            | 1 (3%)           | 0 (0%)           | 3 (10%)          | 8 (6%)            | 0 (0%)            | 33 (11%)          | 2 (2%)            |
| <b>Was your baby breastfed or provided with mother's own pumped/expressed breastmilk in the first weeks after birth?</b> |                    |                  |                  |                  |                  |                   |                  |                  |                  |                   |                   |                   |                   |
|                                                                                                                          | <b>n = 1023</b>    | <b>n = 55</b>    | <b>n = 34</b>    | <b>n = 49</b>    | <b>n = 51</b>    | <b>n = 114</b>    | <b>n = 34</b>    | <b>n = 38</b>    | <b>n = 30</b>    | <b>n = 141</b>    | <b>n = 75</b>     | <b>n = 299</b>    | <b>n = 103</b>    |
| Yes, exclusively                                                                                                         | 506 (49%)          | 38 (69%)         | 14 (41%)         | 25 (51%)         | 31 (61%)         | 53 (46%)          | 15 (44%)         | 9 (24%)          | 22 (73%)         | 67 (48%)          | 24 (32%)          | 178 (60%)         | 30 (29%)          |
| Yes, partly                                                                                                              | 436 (43%)          | 16 (29%)         | 17 (50%)         | 22 (45%)         | 18 (35%)         | 46 (40%)          | 16 (47%)         | 24 (63%)         | 7 (23%)          | 54 (38%)          | 45 (60%)          | 116 (39%)         | 55 (53%)          |
| No, not at all                                                                                                           | 76 (7%)            | 1 (2%)           | 3 (9%)           | 1 (2%)           | 2 (4%)           | 14 (12%)          | 3 (9%)           | 5 (13%)          | 1 (3%)           | 18 (13%)          | 6 (8%)            | 4 (1%)            | 18 (17%)          |
| Don't know                                                                                                               | 5 (0%)             | 0 (0%)           | 0 (0%)           | 1 (2%)           | 0 (0%)           | 1 (1%)            | 0 (0%)           | 0 (0%)           | 0 (0%)           | 2 (1%)            | 0 (0%)            | 1 (0%)            | 0 (0%)            |
| <b>When did the initiation of breastfeeding or provision of mother's own pumped/expressed breastmilk take place?</b>     |                    |                  |                  |                  |                  |                   |                  |                  |                  |                   |                   |                   |                   |
|                                                                                                                          | <b>n = 1026</b>    | <b>n = 55</b>    | <b>n = 34</b>    | <b>n = 49</b>    | <b>n = 51</b>    | <b>n = 115</b>    | <b>n = 34</b>    | <b>n = 38</b>    | <b>n = 31</b>    | <b>n = 141</b>    | <b>n = 75</b>     | <b>n = 300</b>    | <b>n = 103</b>    |
| Not applicable; baby was not breastfed                                                                                   | 56 (5%)            | 1 (2%)           | 2 (6%)           | 0 (0%)           | 2 (4%)           | 12 (10%)          | 2 (6%)           | 4 (11%)          | 0 (0%)           | 19 (13%)          | 3 (4%)            | 1 (0%)            | 10 (10%)          |
| On the first day                                                                                                         | 348 (34%)          | 29 (53%)         | 5 (15%)          | 28 (57%)         | 8 (16%)          | 60 (52%)          | 10 (29%)         | 1 (3%)           | 17 (55%)         | 39 (28%)          | 23 (31%)          | 112 (37%)         | 16 (16%)          |
| After the first day but during the first week                                                                            | 409 (40%)          | 21 (38%)         | 18 (53%)         | 18 (37%)         | 34 (67%)         | 10 (9%)           | 14 (41%)         | 13 (34%)         | 9 (29%)          | 64 (45%)          | 41 (55%)          | 125 (42%)         | 42 (41%)          |
| After the first week                                                                                                     | 172 (17%)          | 4 (7%)           | 9 (26%)          | 2 (4%)           | 4 (8%)           | 26 (23%)          | 7 (21%)          | 19 (50%)         | 4 (13%)          | 13 (9%)           | 7 (9%)            | 45 (15%)          | 32 (31%)          |
| Don't know                                                                                                               | 41 (4%)            | 0 (0%)           | 0 (0%)           | 1 (2%)           | 3 (6%)           | 7 (6%)            | 1 (3%)           | 1 (3%)           | 1 (3%)           | 6 (4%)            | 1 (1%)            | 17 (6%)           | 3 (3%)            |
| <b>Were you allowed to bring expressed milk from home to the unit?</b>                                                   |                    |                  |                  |                  |                  |                   |                  |                  |                  |                   |                   |                   |                   |
|                                                                                                                          | <b>n = 1024</b>    | <b>n = 55</b>    | <b>n = 34</b>    | <b>n = 49</b>    | <b>n = 51</b>    | <b>n = 115</b>    | <b>n = 34</b>    | <b>n = 38</b>    | <b>n = 31</b>    | <b>n = 141</b>    | <b>n = 74</b>     | <b>n = 299</b>    | <b>n = 103</b>    |
| Not applicable; baby was not breastfed                                                                                   | 41 (4%)            | 1 (2%)           | 0 (0%)           | 0 (0%)           | 0 (0%)           | 12 (10%)          | 1 (3%)           | 2 (5%)           | 1 (3%)           | 7 (5%)            | 4 (5%)            | 3 (1%)            | 10 (10%)          |
| Yes                                                                                                                      | 782 (76%)          | 52 (95%)         | 8 (24%)          | 46 (94%)         | 51 (100%)        | 79 (69%)          | 30 (88%)         | 26 (68%)         | 25 (81%)         | 99 (70%)          | 46 (62%)          | 282 (94%)         | 38 (37%)          |
| No, the milk had to be expressed at the hospital                                                                         | 121 (12%)          | 1 (2%)           | 24 (71%)         | 1 (2%)           | 0 (0%)           | 16 (14%)          | 3 (9%)           | 8 (21%)          | 2 (6%)           | 11 (8%)           | 15 (20%)          | 7 (2%)            | 33 (32%)          |
| No, other                                                                                                                | 80 (8%)            | 1 (2%)           | 2 (6%)           | 2 (4%)           | 0 (0%)           | 8 (7%)            | 0 (0%)           | 2 (5%)           | 3 (10%)          | 24 (17%)          | 9 (12%)           | 7 (2%)            | 22 (21%)          |
| <b>How was your baby fed? (multiple answers possible)</b>                                                                |                    |                  |                  |                  |                  |                   |                  |                  |                  |                   |                   |                   |                   |
|                                                                                                                          | <b>n = 1027</b>    | <b>n = 55</b>    | <b>n = 34</b>    | <b>n = 49</b>    | <b>n = 52</b>    | <b>n = 115</b>    | <b>n = 34</b>    | <b>n = 38</b>    | <b>n = 31</b>    | <b>n = 141</b>    | <b>n = 75</b>     | <b>n = 300</b>    | <b>n = 103</b>    |
| <b>Sum of multiple answers</b>                                                                                           | <b>1505 (147%)</b> | <b>83 (151%)</b> | <b>57 (168%)</b> | <b>91 (186%)</b> | <b>79 (152%)</b> | <b>192 (167%)</b> | <b>57 (168%)</b> | <b>59 (155%)</b> | <b>39 (126%)</b> | <b>214 (152%)</b> | <b>122 (163%)</b> | <b>366 (122%)</b> | <b>146 (142%)</b> |
| With breastmilk (breastfeeding or pumped milk)                                                                           | 912 (89%)          | 54 (98%)         | 30 (88%)         | 48 (98%)         | 50 (96%)         | 97 (84%)          | 30 (88%)         | 32 (84%)         | 30 (97%)         | 123 (87%)         | 60 (80%)          | 286 (95%)         | 72 (70%)          |
| With donor milk                                                                                                          | 229 (22%)          | 14 (25%)         | 6 (18%)          | 29 (59%)         | 14 (27%)         | 51 (44%)          | 11 (32%)         | 2 (5%)           | 4 (13%)          | 38 (27%)          | 44 (59%)          | 4 (1%)            | 12 (12%)          |
| With formula milk                                                                                                        | 352 (34%)          | 15 (27%)         | 20 (59%)         | 14 (29%)         | 15 (29%)         | 44 (38%)          | 15 (44%)         | 25 (66%)         | 5 (16%)          | 53 (38%)          | 18 (24%)          | 68 (23%)          | 60 (58%)          |
| Don't know                                                                                                               | 12 (1%)            | 0 (0%)           | 1 (3%)           | 0 (0%)           | 0 (0%)           | 0 (0%)            | 1 (3%)           | 0 (0%)           | 0 (0%)           | 0 (0%)            | 0 (0%)            | 8 (3%)            | 2 (2%)            |

Supplementary Table S5. Information on health communication

|                                                                                                                                                                      | Total              | Australia        | Brazil           | Canada           | China            | France            | Italy            | Mexico           | New Zealand      | Poland            | Sweden            | Turkey            | Ukraine           |
|----------------------------------------------------------------------------------------------------------------------------------------------------------------------|--------------------|------------------|------------------|------------------|------------------|-------------------|------------------|------------------|------------------|-------------------|-------------------|-------------------|-------------------|
| <b>Do you feel you received or are receiving adequate general health information about your baby during the hospital stay?</b>                                       |                    |                  |                  |                  |                  |                   |                  |                  |                  |                   |                   |                   |                   |
|                                                                                                                                                                      | <b>n = 982</b>     | <b>n = 55</b>    | <b>n = 34</b>    | <b>n = 49</b>    | <b>n = 51</b>    | <b>n = 110</b>    | <b>n = 34</b>    | <b>n = 35</b>    | <b>n = 30</b>    | <b>n = 132</b>    | <b>n = 74</b>     | <b>n = 283</b>    | <b>n = 95</b>     |
| Yes, to a high degree                                                                                                                                                | 451 (46%)          | 36 (65%)         | 18 (53%)         | 29 (59%)         | 20 (39%)         | 62 (56%)          | 18 (53%)         | 13 (37%)         | 20 (67%)         | 50 (38%)          | 57 (77%)          | 96 (34%)          | 32 (34%)          |
| Yes, to some degree                                                                                                                                                  | 424 (43%)          | 15 (27%)         | 14 (41%)         | 18 (37%)         | 23 (45%)         | 37 (34%)          | 15 (44%)         | 16 (46%)         | 9 (30%)          | 60 (45%)          | 14 (19%)          | 156 (55%)         | 47 (49%)          |
| No, not at all                                                                                                                                                       | 83 (8%)            | 4 (7%)           | 1 (3%)           | 2 (4%)           | 2 (4%)           | 9 (8%)            | 1 (3%)           | 5 (14%)          | 1 (3%)           | 21 (16%)          | 3 (4%)            | 24 (8%)           | 10 (11%)          |
| Don't know                                                                                                                                                           | 9 (1%)             | 0 (0%)           | 0 (0%)           | 0 (0%)           | 1 (2%)           | 1 (1%)            | 0 (0%)           | 0 (0%)           | 0 (0%)           | 0 (0%)            | 0 (0%)            | 3 (1%)            | 4 (4%)            |
| I didn't receive any information                                                                                                                                     | 15 (2%)            | 0 (0%)           | 1 (3%)           | 0 (0%)           | 5 (10%)          | 1 (1%)            | 0 (0%)           | 1 (3%)           | 0 (0%)           | 1 (1%)            | 0 (0%)            | 4 (1%)            | 2 (2%)            |
| <b>How did you receive health information about your baby during the time your baby received or is receiving special/intensive care? (multiple answers possible)</b> |                    |                  |                  |                  |                  |                   |                  |                  |                  |                   |                   |                   |                   |
|                                                                                                                                                                      | <b>n = 982</b>     | <b>n = 55</b>    | <b>n = 34</b>    | <b>n = 49</b>    | <b>n = 52</b>    | <b>n = 110</b>    | <b>n = 34</b>    | <b>n = 35</b>    | <b>n = 30</b>    | <b>n = 132</b>    | <b>n = 74</b>     | <b>n = 282</b>    | <b>n = 95</b>     |
| <b>Sum of multiple answers</b>                                                                                                                                       | <b>1392 (142%)</b> | <b>96 (175%)</b> | <b>40 (118%)</b> | <b>96 (196%)</b> | <b>78 (150%)</b> | <b>166 (151%)</b> | <b>47 (138%)</b> | <b>40 (114%)</b> | <b>54 (180%)</b> | <b>180 (136%)</b> | <b>111 (150%)</b> | <b>359 (127%)</b> | <b>125 (132%)</b> |
| Meetings with medical/nursing staff (face to face)                                                                                                                   | 743 (76%)          | 50 (91%)         | 34 (100%)        | 46 (94%)         | 24 (46%)         | 96 (87%)          | 31 (91%)         | 28 (80%)         | 28 (93%)         | 79 (60%)          | 74 (100%)         | 164 (58%)         | 89 (94%)          |
| Meetings with medical/nursing staff (video conference)                                                                                                               | 28 (3%)            | 2 (4%)           | 0 (0%)           | 8 (16%)          | 2 (4%)           | 4 (4%)            | 1 (3%)           | 0 (0%)           | 2 (7%)           | 1 (1%)            | 4 (5%)            | 4 (1%)            | 0 (0%)            |
| Phone calls                                                                                                                                                          | 491 (50%)          | 28 (51%)         | 5 (15%)          | 28 (57%)         | 48 (92%)         | 51 (46%)          | 8 (24%)          | 7 (20%)          | 11 (37%)         | 88 (67%)          | 12 (16%)          | 178 (63%)         | 27 (28%)          |
| E-Mails                                                                                                                                                              | 8 (1%)             | 0 (0%)           | 0 (0%)           | 0 (0%)           | 0 (0%)           | 2 (2%)            | 0 (0%)           | 0 (0%)           | 0 (0%)           | 4 (3%)            | 0 (0%)            | 1 (0%)            | 1 (1%)            |
| Letters                                                                                                                                                              | 2 (0%)             | 0 (0%)           | 0 (0%)           | 0 (0%)           | 0 (0%)           | 0 (0%)            | 0 (0%)           | 0 (0%)           | 2 (7%)           | 0 (0%)            | 0 (0%)            | 0 (0%)            | 0 (0%)            |
| Information material (e.g. brochure, website)                                                                                                                        | 84 (9%)            | 13 (24%)         | 0 (0%)           | 11 (22%)         | 3 (6%)           | 9 (8%)            | 3 (9%)           | 2 (6%)           | 10 (33%)         | 5 (4%)            | 21 (28%)          | 2 (1%)            | 5 (5%)            |
| I didn't receive information                                                                                                                                         | 10 (1%)            | 0 (0%)           | 0 (0%)           | 0 (0%)           | 0 (0%)           | 1 (1%)            | 2 (6%)           | 0 (0%)           | 0 (0%)           | 1 (1%)            | 0 (0%)            | 4 (1%)            | 2 (2%)            |
| Other                                                                                                                                                                | 26 (3%)            | 3 (5%)           | 1 (3%)           | 3 (6%)           | 1 (2%)           | 3 (3%)            | 2 (6%)           | 3 (9%)           | 1 (3%)           | 2 (2%)            | 0 (0%)            | 6 (2%)            | 1 (1%)            |
| <b>How often did you receive information about your baby during the time your baby received or is receiving special/intensive care?</b>                              |                    |                  |                  |                  |                  |                   |                  |                  |                  |                   |                   |                   |                   |
|                                                                                                                                                                      | <b>n = 983</b>     | <b>n = 55</b>    | <b>n = 34</b>    | <b>n = 49</b>    | <b>n = 52</b>    | <b>n = 110</b>    | <b>n = 34</b>    | <b>n = 35</b>    | <b>n = 30</b>    | <b>n = 132</b>    | <b>n = 74</b>     | <b>n = 283</b>    | <b>n = 95</b>     |
| Multiple times per day                                                                                                                                               | 261 (27%)          | 30 (55%)         | 5 (15%)          | 23 (47%)         | 1 (2%)           | 59 (54%)          | 9 (26%)          | 5 (14%)          | 15 (50%)         | 22 (17%)          | 42 (57%)          | 28 (10%)          | 22 (23%)          |
| Once per day                                                                                                                                                         | 494 (50%)          | 19 (35%)         | 27 (79%)         | 21 (43%)         | 2 (4%)           | 40 (36%)          | 15 (44%)         | 27 (77%)         | 10 (33%)         | 72 (55%)          | 22 (30%)          | 176 (62%)         | 63 (66%)          |
| Multiple times per week                                                                                                                                              | 168 (17%)          | 4 (7%)           | 2 (6%)           | 2 (4%)           | 32 (62%)         | 6 (5%)            | 7 (21%)          | 2 (6%)           | 3 (10%)          | 34 (26%)          | 9 (12%)           | 59 (21%)          | 8 (8%)            |
| Once per week                                                                                                                                                        | 33 (3%)            | 1 (2%)           | 0 (0%)           | 0 (0%)           | 9 (17%)          | 2 (2%)            | 2 (6%)           | 0 (0%)           | 1 (3%)           | 2 (2%)            | 0 (0%)            | 15 (5%)           | 1 (1%)            |
| Less than once per week                                                                                                                                              | 13 (1%)            | 1 (2%)           | 0 (0%)           | 1 (2%)           | 3 (6%)           | 2 (2%)            | 1 (3%)           | 1 (3%)           | 0 (0%)           | 1 (1%)            | 0 (0%)            | 2 (1%)            | 1 (1%)            |
| Never                                                                                                                                                                | 8 (1%)             | 0 (0%)           | 0 (0%)           | 1 (2%)           | 2 (4%)           | 1 (1%)            | 0 (0%)           | 0 (0%)           | 0 (0%)           | 1 (1%)            | 1 (1%)            | 2 (1%)            | 0 (0%)            |
| Don't know                                                                                                                                                           | 6 (1%)             | 0 (0%)           | 0 (0%)           | 1 (2%)           | 3 (6%)           | 0 (0%)            | 0 (0%)           | 0 (0%)           | 1 (3%)           | 0 (0%)            | 0 (0%)            | 1 (0%)            | 0 (0%)            |

Supplementary Table S5. Information on health communication (continued)

|                                                                                                                                                                                                                           | Total          | Australia     | Brazil        | Canada        | China         | France         | Italy         | Mexico        | New Zealand   | Poland         | Sweden        | Turkey         | Ukraine       |
|---------------------------------------------------------------------------------------------------------------------------------------------------------------------------------------------------------------------------|----------------|---------------|---------------|---------------|---------------|----------------|---------------|---------------|---------------|----------------|---------------|----------------|---------------|
| <b>Do you feel you received or are receiving adequate information about how to protect yourself and your baby from Coronavirus/COVID-19 transmission while your baby received or is receiving special/intensive care?</b> |                |               |               |               |               |                |               |               |               |                |               |                |               |
|                                                                                                                                                                                                                           | <b>n = 983</b> | <b>n = 55</b> | <b>n = 34</b> | <b>n = 49</b> | <b>n = 52</b> | <b>n = 110</b> | <b>n = 34</b> | <b>n = 35</b> | <b>n = 30</b> | <b>n = 132</b> | <b>n = 74</b> | <b>n = 283</b> | <b>n = 95</b> |
| Yes, to a high degree                                                                                                                                                                                                     | 321 (33%)      | 22 (40%)      | 12 (35%)      | 13 (27%)      | 26 (50%)      | 43 (39%)       | 21 (62%)      | 12 (34%)      | 11 (37%)      | 30 (23%)       | 31 (42%)      | 73 (26%)       | 27 (28%)      |
| Yes, to some degree                                                                                                                                                                                                       | 334 (34%)      | 23 (42%)      | 14 (41%)      | 22 (45%)      | 15 (29%)      | 38 (35%)       | 8 (24%)       | 15 (43%)      | 12 (40%)      | 37 (28%)       | 23 (31%)      | 92 (33%)       | 35 (37%)      |
| No, not at all                                                                                                                                                                                                            | 187 (19%)      | 3 (5%)        | 4 (12%)       | 11 (22%)      | 2 (4%)        | 18 (16%)       | 3 (9%)        | 5 (14%)       | 3 (10%)       | 29 (22%)       | 14 (19%)      | 80 (28%)       | 15 (16%)      |
| Don't know                                                                                                                                                                                                                | 49 (5%)        | 2 (4%)        | 0 (0%)        | 1 (2%)        | 5 (10%)       | 2 (2%)         | 1 (3%)        | 2 (6%)        | 0 (0%)        | 15 (11%)       | 5 (7%)        | 9 (3%)         | 7 (7%)        |
| I didn't receive any information                                                                                                                                                                                          | 92 (9%)        | 5 (9%)        | 4 (12%)       | 2 (4%)        | 4 (8%)        | 9 (8%)         | 1 (3%)        | 1 (3%)        | 4 (13%)       | 21 (16%)       | 1 (1%)        | 29 (10%)       | 11 (12%)      |
| <b>Do you feel you received adequate information about Coronavirus/COVID-19 when discharged from the hospital?</b>                                                                                                        |                |               |               |               |               |                |               |               |               |                |               |                |               |
|                                                                                                                                                                                                                           | <b>n = 982</b> | <b>n = 55</b> | <b>n = 34</b> | <b>n = 49</b> | <b>n = 52</b> | <b>n = 110</b> | <b>n = 34</b> | <b>n = 35</b> | <b>n = 30</b> | <b>n = 132</b> | <b>n = 74</b> | <b>n = 282</b> | <b>n = 95</b> |
| Yes, to a high degree                                                                                                                                                                                                     | 204 (21%)      | 14 (25%)      | 6 (18%)       | 5 (10%)       | 20 (38%)      | 29 (26%)       | 14 (41%)      | 6 (17%)       | 2 (7%)        | 22 (17%)       | 18 (24%)      | 51 (18%)       | 17 (18%)      |
| Yes, to some degree                                                                                                                                                                                                       | 224 (23%)      | 16 (29%)      | 14 (41%)      | 19 (39%)      | 15 (29%)      | 21 (19%)       | 10 (29%)      | 9 (26%)       | 8 (27%)       | 15 (11%)       | 16 (22%)      | 62 (22%)       | 19 (20%)      |
| No, not at all                                                                                                                                                                                                            | 217 (22%)      | 7 (13%)       | 5 (15%)       | 12 (24%)      | 1 (2%)        | 29 (26%)       | 6 (18%)       | 10 (29%)      | 7 (23%)       | 20 (15%)       | 20 (27%)      | 77 (27%)       | 23 (24%)      |
| Don't know                                                                                                                                                                                                                | 35 (4%)        | 1 (2%)        | 0 (0%)        | 0 (0%)        | 3 (6%)        | 3 (3%)         | 0 (0%)        | 2 (6%)        | 0 (0%)        | 8 (6%)         | 2 (3%)        | 8 (3%)         | 8 (8%)        |
| I didn't receive any information                                                                                                                                                                                          | 157 (16%)      | 10 (18%)      | 4 (12%)       | 6 (12%)       | 2 (4%)        | 15 (14%)       | 2 (6%)        | 4 (11%)       | 5 (17%)       | 50 (38%)       | 8 (11%)       | 34 (12%)       | 17 (18%)      |
| No discharge yet                                                                                                                                                                                                          | 145 (15%)      | 7 (13%)       | 5 (15%)       | 7 (14%)       | 11 (21%)      | 13 (12%)       | 2 (6%)        | 4 (11%)       | 8 (27%)       | 17 (13%)       | 10 (14%)      | 50 (18%)       | 11 (12%)      |



Supplementary Table S6. Information on mental health status

|                                                                                                                                                                                      | Total              | Australia        | Brazil           | Canada           | China            | France            | Italy            | Mexico           | New Zealand      | Poland            | Sweden           | Turkey            | Ukraine           |
|--------------------------------------------------------------------------------------------------------------------------------------------------------------------------------------|--------------------|------------------|------------------|------------------|------------------|-------------------|------------------|------------------|------------------|-------------------|------------------|-------------------|-------------------|
| <b>Did you worry because of the Coronavirus/COVID-19 situation during pregnancy?</b>                                                                                                 |                    |                  |                  |                  |                  |                   |                  |                  |                  |                   |                  |                   |                   |
|                                                                                                                                                                                      | <b>n = 966</b>     | <b>n = 55</b>    | <b>n = 33</b>    | <b>n = 48</b>    | <b>n = 50</b>    | <b>n = 107</b>    | <b>n = 34</b>    | <b>n = 34</b>    | <b>n = 30</b>    | <b>n = 132</b>    | <b>n = 71</b>    | <b>n = 278</b>    | <b>n = 94</b>     |
| Yes, to a high degree                                                                                                                                                                | 459 (48%)          | 25 (45%)         | 17 (52%)         | 20 (42%)         | 9 (18%)          | 35 (33%)          | 13 (38%)         | 24 (71%)         | 11 (37%)         | 66 (50%)          | 25 (35%)         | 157 (56%)         | 57 (61%)          |
| Yes, to some degree                                                                                                                                                                  | 304 (31%)          | 19 (35%)         | 7 (21%)          | 19 (40%)         | 17 (34%)         | 44 (41%)          | 17 (50%)         | 6 (18%)          | 15 (50%)         | 39 (30%)          | 27 (38%)         | 66 (24%)          | 28 (30%)          |
| No, not at all                                                                                                                                                                       | 100 (10%)          | 5 (9%)           | 0 (0%)           | 5 (10%)          | 20 (40%)         | 11 (10%)          | 1 (3%)           | 1 (3%)           | 3 (10%)          | 11 (8%)           | 14 (20%)         | 23 (8%)           | 6 (6%)            |
| Don't know                                                                                                                                                                           | 12 (1%)            | 0 (0%)           | 0 (0%)           | 0 (0%)           | 0 (0%)           | 3 (3%)            | 1 (3%)           | 0 (0%)           | 0 (0%)           | 5 (4%)            | 0 (0%)           | 3 (1%)            | 0 (0%)            |
| Coronavirus/COVID-19 was not an issue then                                                                                                                                           | 91 (9%)            | 6 (11%)          | 9 (27%)          | 4 (8%)           | 4 (8%)           | 14 (13%)          | 2 (6%)           | 3 (9%)           | 1 (3%)           | 11 (8%)           | 5 (7%)           | 29 (10%)          | 3 (3%)            |
| <b>Did (or do) you struggle to be present with your baby who received or is receiving special care due to other obligations you have (e.g. for other children, family member/s)?</b> |                    |                  |                  |                  |                  |                   |                  |                  |                  |                   |                  |                   |                   |
|                                                                                                                                                                                      | <b>n = 966</b>     | <b>n = 55</b>    | <b>n = 33</b>    | <b>n = 48</b>    | <b>n = 51</b>    | <b>n = 107</b>    | <b>n = 34</b>    | <b>n = 34</b>    | <b>n = 30</b>    | <b>n = 131</b>    | <b>n = 72</b>    | <b>n = 278</b>    | <b>n = 93</b>     |
| Yes, to a high degree                                                                                                                                                                | 207 (21%)          | 13 (24%)         | 5 (15%)          | 12 (25%)         | 7 (14%)          | 16 (15%)          | 2 (6%)           | 13 (38%)         | 4 (13%)          | 21 (16%)          | 24 (33%)         | 70 (25%)          | 20 (22%)          |
| Yes, to some degree                                                                                                                                                                  | 261 (27%)          | 12 (22%)         | 8 (24%)          | 15 (31%)         | 12 (24%)         | 28 (26%)          | 7 (21%)          | 7 (21%)          | 12 (40%)         | 22 (17%)          | 27 (38%)         | 81 (29%)          | 30 (32%)          |
| No, not at all                                                                                                                                                                       | 440 (46%)          | 30 (55%)         | 20 (61%)         | 21 (44%)         | 27 (53%)         | 62 (58%)          | 25 (74%)         | 13 (38%)         | 14 (47%)         | 66 (50%)          | 19 (26%)         | 108 (39%)         | 35 (38%)          |
| Don't know                                                                                                                                                                           | 58 (6%)            | 0 (0%)           | 0 (0%)           | 0 (0%)           | 5 (10%)          | 1 (1%)            | 0 (0%)           | 1 (3%)           | 0 (0%)           | 22 (17%)          | 2 (3%)           | 19 (7%)           | 8 (9%)            |
| <b>What kind of support was offered? (multiple answers possible)</b>                                                                                                                 |                    |                  |                  |                  |                  |                   |                  |                  |                  |                   |                  |                   |                   |
|                                                                                                                                                                                      | <b>n = 967</b>     | <b>n = 55</b>    | <b>n = 32</b>    | <b>n = 48</b>    | <b>n = 51</b>    | <b>n = 107</b>    | <b>n = 34</b>    | <b>n = 34</b>    | <b>n = 30</b>    | <b>n = 132</b>    | <b>n = 72</b>    | <b>n = 278</b>    | <b>n = 94</b>     |
| <b>Sum of multiple answers</b>                                                                                                                                                       | <b>1239 (128%)</b> | <b>94 (171%)</b> | <b>36 (113%)</b> | <b>80 (167%)</b> | <b>84 (165%)</b> | <b>150 (140%)</b> | <b>41 (121%)</b> | <b>38 (112%)</b> | <b>41 (137%)</b> | <b>149 (113%)</b> | <b>97 (135%)</b> | <b>313 (113%)</b> | <b>116 (123%)</b> |
| Psychological counselling                                                                                                                                                            | 280 (29%)          | 18 (33%)         | 11 (34%)         | 10 (21%)         | 9 (18%)          | 87 (81%)          | 15 (44%)         | 5 (15%)          | 6 (20%)          | 46 (35%)          | 29 (40%)         | 26 (9%)           | 18 (19%)          |
| Self-help groups                                                                                                                                                                     | 30 (3%)            | 2 (4%)           | 0 (0%)           | 4 (8%)           | 3 (6%)           | 3 (3%)            | 2 (6%)           | 1 (3%)           | 1 (3%)           | 4 (3%)            | 1 (1%)           | 7 (3%)            | 2 (2%)            |
| Parent groups                                                                                                                                                                        | 133 (14%)          | 18 (33%)         | 2 (6%)           | 15 (31%)         | 26 (51%)         | 8 (7%)            | 3 (9%)           | 2 (6%)           | 5 (17%)          | 12 (9%)           | 5 (7%)           | 17 (6%)           | 20 (21%)          |
| Peer-to-peer support                                                                                                                                                                 | 101 (10%)          | 4 (7%)           | 0 (0%)           | 9 (19%)          | 23 (45%)         | 0 (0%)            | 2 (6%)           | 2 (6%)           | 3 (10%)          | 11 (8%)           | 1 (1%)           | 30 (11%)          | 16 (17%)          |
| Social worker                                                                                                                                                                        | 182 (19%)          | 42 (76%)         | 2 (6%)           | 27 (56%)         | 7 (14%)          | 33 (31%)          | 1 (3%)           | 5 (15%)          | 16 (53%)         | 0 (0%)            | 44 (61%)         | 4 (1%)            | 1 (1%)            |
| None                                                                                                                                                                                 | 462 (48%)          | 9 (16%)          | 21 (66%)         | 11 (23%)         | 9 (18%)          | 13 (12%)          | 17 (50%)         | 21 (62%)         | 8 (27%)          | 72 (55%)          | 11 (15%)         | 213 (77%)         | 57 (61%)          |
| Don't know                                                                                                                                                                           | 33 (3%)            | 1 (2%)           | 0 (0%)           | 1 (2%)           | 6 (12%)          | 2 (2%)            | 0 (0%)           | 2 (6%)           | 1 (3%)           | 3 (2%)            | 2 (3%)           | 14 (5%)           | 1 (1%)            |
| Other                                                                                                                                                                                | 18 (2%)            | 0 (0%)           | 0 (0%)           | 3 (6%)           | 1 (2%)           | 4 (4%)            | 1 (3%)           | 0 (0%)           | 1 (3%)           | 1 (1%)            | 4 (6%)           | 2 (1%)            | 1 (1%)            |

STROBE statement - checklist of items that should be included in reports of observational/population/cohort studies

|                              | Item No | Recommendation                                                                                                                                                                                                                                                                                                                                                                                                                                                         | Page No |
|------------------------------|---------|------------------------------------------------------------------------------------------------------------------------------------------------------------------------------------------------------------------------------------------------------------------------------------------------------------------------------------------------------------------------------------------------------------------------------------------------------------------------|---------|
| <b>Title and abstract</b>    | 1       | (a) Indicate the study's design with a commonly used term in the title or the abstract                                                                                                                                                                                                                                                                                                                                                                                 | 1-2     |
|                              |         | (b) Provide in the abstract an informative and balanced summary of what was done and what was found                                                                                                                                                                                                                                                                                                                                                                    | 2       |
| <b>Introduction</b>          |         |                                                                                                                                                                                                                                                                                                                                                                                                                                                                        |         |
| Background/rationale         | 2       | Explain the scientific background and rationale for the investigation being reported                                                                                                                                                                                                                                                                                                                                                                                   | 4       |
| Objectives                   | 3       | State specific objectives, including any prespecified hypotheses                                                                                                                                                                                                                                                                                                                                                                                                       | 4       |
| <b>Methods</b>               |         |                                                                                                                                                                                                                                                                                                                                                                                                                                                                        |         |
| Study design                 | 4       | Present key elements of study design early in the paper                                                                                                                                                                                                                                                                                                                                                                                                                | 4       |
| Setting                      | 5       | Describe the setting, locations, and relevant dates, including periods of recruitment, exposure, follow-up, and data collection                                                                                                                                                                                                                                                                                                                                        | 4-5     |
| Participants                 | 6       | (a) <i>Cohort study</i> —Give the eligibility criteria, and the sources and methods of selection of participants. Describe methods of follow-up<br><i>Case-control study</i> —Give the eligibility criteria, and the sources and methods of case ascertainment and control selection. Give the rationale for the choice of cases and controls<br><i>Cross-sectional study</i> —Give the eligibility criteria, and the sources and methods of selection of participants | 4-5     |
|                              |         | (b) <i>Cohort study</i> —For matched studies, give matching criteria and number of exposed and unexposed<br><i>Case-control study</i> —For matched studies, give matching criteria and the number of controls per case                                                                                                                                                                                                                                                 | n/a     |
| Variables                    | 7       | Clearly define all outcomes, exposures, predictors, potential confounders, and effect modifiers. Give diagnostic criteria, if applicable                                                                                                                                                                                                                                                                                                                               | 5       |
| Data sources/<br>measurement | 8*      | For each variable of interest, give sources of data and details of methods of assessment (measurement). Describe comparability of assessment methods if there is more than one group                                                                                                                                                                                                                                                                                   | 5       |
| Bias                         | 9       | Describe any efforts to address potential sources of bias                                                                                                                                                                                                                                                                                                                                                                                                              | 5       |
| Study size                   | 10      | Explain how the study size was arrived at                                                                                                                                                                                                                                                                                                                                                                                                                              | 5       |
| Quantitative variables       | 11      | Explain how quantitative variables were handled in the analyses. If applicable, describe which groupings were chosen and why                                                                                                                                                                                                                                                                                                                                           | 5       |
| Statistical methods          | 12      | (a) Describe all statistical methods, including those used to control for confounding                                                                                                                                                                                                                                                                                                                                                                                  | 5       |
|                              |         | (b) Describe any methods used to examine subgroups and interactions                                                                                                                                                                                                                                                                                                                                                                                                    | n/a     |
|                              |         | (c) Explain how missing data were addressed                                                                                                                                                                                                                                                                                                                                                                                                                            | 5       |
|                              |         | (d) <i>Cohort study</i> —If applicable, explain how loss to follow-up was addressed<br><i>Case-control study</i> —If applicable, explain how matching of cases and controls was addressed<br><i>Cross-sectional study</i> —If applicable, describe analytical methods taking account of sampling strategy                                                                                                                                                              | 5       |
|                              |         | (e) Describe any sensitivity analyses                                                                                                                                                                                                                                                                                                                                                                                                                                  | n/a     |

1  
2  
3  
4  
5  
6  
7  
8  
9  
10  
11  
12  
13  
14  
15  
16  
17  
18  
19  
20  
21  
22  
23  
24  
25  
26  
27  
28  
29  
30  
31  
32  
33  
34  
35  
36  
37  
38  
39  
40  
41  
42  
43  
44  
45  
46  
47  
48  
49  
50  
51  
52  
53  
54  
55  
56  
57  
58  
59  
60

| <b>Results</b>           |     |                                                                                                                                                                                                              |       |
|--------------------------|-----|--------------------------------------------------------------------------------------------------------------------------------------------------------------------------------------------------------------|-------|
| Participants             | 13* | (a) Report numbers of individuals at each stage of study—eg numbers potentially eligible, examined for eligibility, confirmed eligible, included in the study, completing follow-up, and analysed            | 6     |
|                          |     | (b) Give reasons for non-participation at each stage                                                                                                                                                         | n/a   |
|                          |     | (c) Consider use of a flow diagram                                                                                                                                                                           | n/a   |
| Descriptive data         | 14* | (a) Give characteristics of study participants (eg demographic, clinical, social) and information on exposures and potential confounders                                                                     | 6     |
|                          |     | (b) Indicate number of participants with missing data for each variable of interest                                                                                                                          | 6     |
|                          |     | (c) <i>Cohort study</i> —Summarise follow-up time (eg, average and total amount)                                                                                                                             | n/a   |
| Outcome data             | 15* | <i>Cohort study</i> —Report numbers of outcome events or summary measures over time                                                                                                                          |       |
|                          |     | <i>Case-control study</i> —Report numbers in each exposure category, or summary measures of exposure                                                                                                         |       |
|                          |     | <i>Cross-sectional study</i> —Report numbers of outcome events or summary measures                                                                                                                           | 7-12  |
| Main results             | 16  | (a) Give unadjusted estimates and, if applicable, confounder-adjusted estimates and their precision (eg, 95% confidence interval). Make clear which confounders were adjusted for and why they were included | 7-12  |
|                          |     | (b) Report category boundaries when continuous variables were categorized                                                                                                                                    | n/a   |
|                          |     | (c) If relevant, consider translating estimates of relative risk into absolute risk for a meaningful time period                                                                                             | n/a   |
| Other analyses           | 17  | Report other analyses done—eg analyses of subgroups and interactions, and sensitivity analyses                                                                                                               | 7-12  |
| <b>Discussion</b>        |     |                                                                                                                                                                                                              |       |
| Key results              | 18  | Summarise key results with reference to study objectives                                                                                                                                                     | 12-14 |
| Limitations              | 19  | Discuss limitations of the study, taking into account sources of potential bias or imprecision. Discuss both direction and magnitude of any potential bias                                                   | 14    |
| Interpretation           | 20  | Give a cautious overall interpretation of results considering objectives, limitations, multiplicity of analyses, results from similar studies, and other relevant evidence                                   | 14    |
| Generalisability         | 21  | Discuss the generalisability (external validity) of the study results                                                                                                                                        | 14    |
| <b>Other information</b> |     |                                                                                                                                                                                                              |       |
| Funding                  | 22  | Give the source of funding and the role of the funders for the present study and, if applicable, for the original study on which the present article is based                                                | 15    |

\*Give information separately for cases and controls in case-control studies and, if applicable, for exposed and unexposed groups in cohort and cross-sectional studies.

**Note:** An Explanation and Elaboration article discusses each checklist item and gives methodological background and published examples of transparent reporting. The STROBE checklist is best used in conjunction with this article (freely available on the Web sites of PLoS Medicine at <http://www.plosmedicine.org/>, Annals of Internal Medicine at <http://www.annals.org/>, and Epidemiology at <http://www.epidem.com/>). Information on the STROBE Initiative is available at [www.strobe-statement.org](http://www.strobe-statement.org).

# BMJ Open

## Parents' experiences regarding neonatal care during the COVID-19 pandemic – country-specific findings of a multi-national survey

|                                 |                                                                                                                                                                                                                                                                                                                                                                                                                                                                                                                                                                                                                                                                                                                                                                                       |
|---------------------------------|---------------------------------------------------------------------------------------------------------------------------------------------------------------------------------------------------------------------------------------------------------------------------------------------------------------------------------------------------------------------------------------------------------------------------------------------------------------------------------------------------------------------------------------------------------------------------------------------------------------------------------------------------------------------------------------------------------------------------------------------------------------------------------------|
| Journal:                        | <i>BMJ Open</i>                                                                                                                                                                                                                                                                                                                                                                                                                                                                                                                                                                                                                                                                                                                                                                       |
| Manuscript ID                   | bmjopen-2021-056856.R1                                                                                                                                                                                                                                                                                                                                                                                                                                                                                                                                                                                                                                                                                                                                                                |
| Article Type:                   | Original research                                                                                                                                                                                                                                                                                                                                                                                                                                                                                                                                                                                                                                                                                                                                                                     |
| Date Submitted by the Author:   | 07-Jan-2022                                                                                                                                                                                                                                                                                                                                                                                                                                                                                                                                                                                                                                                                                                                                                                           |
| Complete List of Authors:       | Kostenzer, Johanna; European Foundation for the Care of Newborn Infants, Scientific Affairs<br>von Rosenstiel-Pulver, Charlotte; European Foundation for the Care of Newborn Infants, Scientific Affairs<br>Hoffmann, Julia; European Foundation for the Care of Newborn Infants, Scientific Affairs<br>Walsh, Aisling; European Foundation for the Care of Newborn Infants, Scientific Affairs<br>Mader, Silke; European Foundation for the Care of Newborn Infants, Scientific Affairs<br>Zimmermann, Luc; European Foundation for the Care of Newborn Infants, Scientific Affairs; Maastricht UMC+, Department of Paediatrics, Research School Oncology and Development<br>COVID-19 Zero Separation Collaborative Group, n.a.; European Foundation for the Care of Newborn Infants |
| <b>Primary Subject Heading</b>: | Paediatrics                                                                                                                                                                                                                                                                                                                                                                                                                                                                                                                                                                                                                                                                                                                                                                           |
| Secondary Subject Heading:      | Global health, Health policy, Intensive care, Paediatrics, Patient-centred medicine                                                                                                                                                                                                                                                                                                                                                                                                                                                                                                                                                                                                                                                                                                   |
| Keywords:                       | COVID-19, Public health < INFECTIOUS DISEASES, Neonatal intensive & critical care < INTENSIVE & CRITICAL CARE, NEONATOLOGY, PUBLIC HEALTH, Health policy < HEALTH SERVICES ADMINISTRATION & MANAGEMENT                                                                                                                                                                                                                                                                                                                                                                                                                                                                                                                                                                                |
|                                 |                                                                                                                                                                                                                                                                                                                                                                                                                                                                                                                                                                                                                                                                                                                                                                                       |

SCHOLARONE™  
Manuscripts



I, the Submitting Author has the right to grant and does grant on behalf of all authors of the Work (as defined in the below author licence), an exclusive licence and/or a non-exclusive licence for contributions from authors who are: i) UK Crown employees; ii) where BMJ has agreed a CC-BY licence shall apply, and/or iii) in accordance with the terms applicable for US Federal Government officers or employees acting as part of their official duties; on a worldwide, perpetual, irrevocable, royalty-free basis to BMJ Publishing Group Ltd ("BMJ") its licensees and where the relevant Journal is co-owned by BMJ to the co-owners of the Journal, to publish the Work in this journal and any other BMJ products and to exploit all rights, as set out in our [licence](#).

The Submitting Author accepts and understands that any supply made under these terms is made by BMJ to the Submitting Author unless you are acting as an employee on behalf of your employer or a postgraduate student of an affiliated institution which is paying any applicable article publishing charge ("APC") for Open Access articles. Where the Submitting Author wishes to make the Work available on an Open Access basis (and intends to pay the relevant APC), the terms of reuse of such Open Access shall be governed by a Creative Commons licence – details of these licences and which [Creative Commons](#) licence will apply to this Work are set out in our licence referred to above.

Other than as permitted in any relevant BMJ Author's Self Archiving Policies, I confirm this Work has not been accepted for publication elsewhere, is not being considered for publication elsewhere and does not duplicate material already published. I confirm all authors consent to publication of this Work and authorise the granting of this licence.

1  
2  
3 1 *Parents' experiences regarding neonatal care during the COVID-19 pandemic*  
4 2 *– country-specific findings of a multi-national survey*  
5 3  
6 4  
7 5  
8 6  
9 7

10 7 **Authors:**  
11 8

12 9 Johanna Kostenzer<sup>1</sup>, Charlotte von Rosenstiel-Pulver<sup>1</sup>, Julia Hoffmann<sup>1</sup>, Aisling Walsh<sup>1</sup>, Silke Mader<sup>1\*</sup>,  
13 10 Luc J.I. Zimmermann<sup>1,2</sup>, on behalf of the COVID-19 Zero Separation Collaborative Group  
14 11

15 12 <sup>1</sup>European Foundation for the Care of Newborn Infants (EFCNI), Scientific Affairs, Hofmannstrasse  
16 13 7A, D-81379 München, Germany  
17 14

18 15 <sup>2</sup>Department of Paediatrics, Research School Oncology and Development, Maastricht UMC+,  
19 16 Maastricht, The Netherlands  
20 17  
21 18  
22 19

23 20 \*Corresponding author: Silke Mader, European Foundation for the Care of Newborn Infants (EFCNI),  
24 21 Hofmannstraße 7A, 81379 Munich, Germany, [S.MaderOffice@efeni.org](mailto:S.MaderOffice@efeni.org)  
25 22  
26 23  
27 24  
28 25

29 25 Word count: 5529  
30 26  
31  
32  
33  
34  
35  
36  
37  
38  
39  
40  
41  
42  
43  
44  
45  
46  
47  
48  
49  
50  
51  
52  
53  
54  
55  
56  
57  
58  
59  
60

## ABSTRACT

### Objectives

The COVID-19 pandemic has disrupted healthcare systems, challenging neonatal care provision globally. Curtailed visitation policies are known to negatively affect the medical and emotional care of sick, preterm, and low birthweight infants, compromising the achievement of the 2030 Development Agenda. Focusing on infant and family-centred developmental care (IFCDC), we explored parents' experiences of the disruptions affecting newborns in need of special or intensive care during the first year of the pandemic.

### Design

Cross-sectional study using an electronic, web-based questionnaire.

### Setting

Multi-country online-survey.

### Methods

Data were collected between August and November 2020 using a pre-tested online, multi-lingual questionnaire. The target group consisted of parents of preterm, sick or low birthweight infants born during the first year of the COVID-19 pandemic and who received special/intensive care. The analysis followed a descriptive quantitative approach.

### Results

In total, 1148 participants from 12 countries (Australia, Brazil, Canada, China, France, Italy, Mexico, New Zealand, Poland, Sweden, Turkey, Ukraine) were eligible for analysis. We identified significant country-specific differences, showing that the application of IFCDC is less prone to disruptions in some countries than in others. For example, parental presence was affected: 27% of the total respondents indicated that no-one was allowed to be present with the infant receiving special/intensive care. In Australia, Canada, France, New Zealand and Sweden, both the mother and the father (in more than 90% of cases) was allowed access to the newborn, whereas participants indicated that no-one was allowed to be present in China (52%), Poland (39%), Turkey (49%), and Ukraine (32%).

### Conclusions

The application of IFCDC during the COVID-19 pandemic differs between countries. There is an urgent need to reconsider separation policies and to strengthen the infant and family-centred developmental care approach worldwide to ensure the 2030 Development Agenda is achieved.

### Strengths and limitations of this study

- This is the first multi-national survey exploring parents' experiences of the disruptions affecting newborns in need of special or intensive care during the first year of the pandemic.
- The cross-country approach, data collection in 12 countries and extensive outreach allowed us to acquire in-depth insights into parents' experiences.
- The online format of the study bears the risk of selection bias, and response rates could not be calculated.
- The respective pandemic situation, geographical, climatic and environmental aspects, as well as containment strategies vary between (and sometimes even within) countries.
- The findings comprehensively reflect the parent perspective across multiple countries giving insights into country-specific differences.

For peer review only



## INTRODUCTION

During the last decades, major achievements have been made in the field of maternal and newborn health, particularly in light of the United Nations Sustainable Development Goals [1]. While efforts have resulted in a reduction of maternal and neonatal deaths and better health outcomes for newborns worldwide, progress in particular affecting preterm, sick, and low birthweight infants has been slow [1,2]. Pandemic-related shortages in maternal and newborn care provision have severe consequences for vulnerable infants and their families [3–5], continuing to threaten the achievement of the 2030 Development Agenda [6].

Worldwide, one in ten infants is born preterm every year, with increasing rates in almost all countries where reliable epidemiologic datasets are available, making it a truly global problem [7]. Preterm birth is the leading cause of death under five years of age, and together with birth complications, it is the leading cause of neonatal death [6,8,9]. The extremely fragile group of patients requires highly specialised care, which is labour and cost intense, and thus, stark regional discrepancies in the availability of specialised care are well described [10]. However, whilst international agreements, like the United Nations Convention on the Rights of the Child or the European Association for Children in Hospital (EACH), foster the right of children to be close to their parents [11,12], these rights have not yet been implemented in the majority of neonatal units across the globe where parents and their newborns have often been separated – already in pre-pandemic times – yet increasingly as a response to the ongoing global health crisis [13–15]. Before the COVID-19 pandemic hit the globe, an increasing number of neonatal units worldwide had adopted the principles of infant- and family-centred developmental care (IFCDC), such as unrestricted parental access, active parental participation and involvement and Kangaroo Mother Care (KMC) [16,17]. However, IFCDC is so far still a new concept and its implementation remains to be one of the biggest challenges in neonatal care as it also requires a fundamental change in the mentality of neonatal caregivers [16–20].

The COVID-19 pandemic and related restrictions have resulted in severe limitations in neonatal care provision [18], especially regarding acknowledged elements of IFCDC [15,21–27]. The frequently implemented separation of parents and their newborns has negative implications for the health outcomes of newborns [28–30], interfering with acknowledged practices such as KMC, skin-to-skin contact [31], and breastfeeding [32]. The reduction of parental presence in the neonatal intensive care units (NICU) has led to increased stress and mental health problems among parents and families, raising the risk of postnatal depression and posttraumatic stress syndrome, and limited opportunities for parent-infant bonding [14,15], while staff shortages and the lack of available guidelines have led to high levels of stress and anxiety among health professionals [21,33]. Few studies and reports have provided insights into parents' experiences regarding some of the implemented restrictions [14,15,34]. However, a comparative and holistic approach, emphasising the cornerstones of IFCDC, has been missing so far, which is the focus of this research.

With this study, we explored parents' experiences of disruptions to neonatal care during the first year of the COVID-19 pandemic across the globe, focusing on individual country actions. We aimed to document the challenges experienced by parents, spanning wide variations across countries and regions. The analysis and corresponding findings shall provide an incentive for policy makers, public health experts, and healthcare professionals alike to learn from the different approaches and subsequent implications of the outcomes of single countries and underline the importance of parents' involvement in the care of vulnerable newborns. It is imperative that this occurs, irrespective of the ongoing pandemic or future emergency situations.

## METHODS

### Study design and population

We conducted a cross-sectional study using an electronic, web-based questionnaire with the aim to explore parents' experiences during the first year of the COVID-19 pandemic with regard to the core

1  
2  
3 133 elements of IFCDC. Eligible for participation were parents of preterm, sick or low birthweight infants  
4 134 born during the first year of the COVID-19 pandemic (as of December 1, 2019) and who were receiving  
5 135 special or intensive care (inclusion criteria). The term "parent" was broadly defined, encompassing  
6 136 biological and/or social parents, allowing for self-definition as "mother," "father," or "other parent." We  
7 137 conducted and reported the study according to the Checklist for Reporting Results of Internet E-Surveys  
8 138 (CHERRIES) [35].  
9 139

10 140 Participants were recruited by the European Foundation for the Care of Newborn Infants (EFCNI), and  
11 141 its initiative, the Global Alliance for Newborn Care (GLANCE), through social media activities,  
12 142 newsletters, website outreach, and mailings. In addition, national parent organisations and the  
13 143 collaborating professional healthcare associations and their members, namely the Council of  
14 144 International Neonatal Nurses (COINN), the European Society for Paediatric Research (ESPR), the  
15 145 Neonatal Individualised Developmental Care and Assessment Project (NIDCAP), and the Union of  
16 146 European Neonatal and Perinatal Societies (UENPS), supported the dissemination of the survey link by  
17 147 promoting the study across their networks. Participation was voluntary, data collection occurred  
18 148 anonymously.  
19 149

### 20 150 **Questionnaire development and pre-testing**

21 151  
22 152 Researchers of the EFCNI scientific department developed the questionnaire in collaboration with the  
23 153 members of the COVID-19 Zero Separation Collaborative Group – an interdisciplinary stakeholder  
24 154 group including medical experts and parent/patient representatives. The survey was pre-tested among  
25 155 n=8 parents who met the target group criteria who did not request any changes of the questionnaire.  
26 156

27 157 The questionnaire consisted of 52 questions with pre-defined answers and single or multiple response  
28 158 answer options (Supplementary Material S9). It encompassed information about the respondent and  
29 159 infant, and COVID-19-related topics as well as categories of IFCDC [25], including the following  
30 160 elements: (1) background information, (2) COVID-19 testing and measures in the respective  
31 161 country/region (3) access to perinatal care, (4) presence with the newborn receiving special/intensive  
32 162 care, (5) breastfeeding/infant nutrition, (6) health communication, and (7) mental health and support.  
33 163 Parent representatives from EFCNI's international parent network supported the translations of the final  
34 164 version into 23 languages, which were all reviewed and approved by native medical professionals.  
35 165

### 36 166 **Data collection and statistical analysis**

37 167  
38 168 Data were collected between August and November 2020 using the SurveyMonkey® online survey tool.  
39 169 The analysis included answers from all respondents who met the inclusion criteria, regardless of whether  
40 170 they completed the survey to the end. The subsequent analysis was performed as sub-analysis based on  
41 171 a global survey with available data from 56 countries as previously described elsewhere [18]. For this  
42 172 sub-analysis, countries having a minimum of at least 30 answers per country were considered eligible  
43 173 for inclusion. A subsequent country selection depending on pre-defined criteria, such as sample size,  
44 174 geographical variation (continent, north/south), and COVID-19 situation [36,37] was conducted by the  
45 175 five main authors of this study using a consensus approach with ranking and voting. Recently published  
46 176 scientific articles on different countries' COVID-19-related preparedness, responses and implemented  
47 177 restrictions [38–42] acted as a basis for a comprehensive and diverse country selection resulting in the  
48 178 following included countries: Australia, Brazil, Canada, China, France, Italy, Mexico, New Zealand,  
49 179 Poland, Sweden, Turkey, and Ukraine.  
50 180

51 181 Data analysis was conducted using an exploratory approach with descriptive statistics (number of  
52 182 answers and proportion (n (%)). Multiple-answer questions were analysed as the sum of the number of  
53 183 responses per answer choice (n (%)) and may exceed 100%. A 95% CI was calculated (CI for  
54 184 proportions) for questions related to presence with the newborn and skin-to-skin care using one answer  
55 185 option in order to determine statistically significant deviations between countries and the overall total.  
56 186 A colour-coding indicated countries whose 95% CI did not overlap and was significantly different from  
57 187 the CI of all countries (country higher (blue) or country lower (green)). All analyses presented herein

1  
2  
3 188 were carried out using SPSS software (IBM SPSS Statistics for Windows, version 27-0, IBM Corp,  
4 189 Armonk, New York) and Microsoft Excel (version 16).

### 6 191 **Ethical considerations**

7 192  
8 193 Data collection, processing and storage conformed to the General Data Protection Regulation and the  
9 194 Declaration of Helsinki. Informed consent was given by ticking a confirmation box. For those who  
10 195 declined to participate, the web-interface was terminated. Respondents were informed that some of the  
11 196 questions might cause distressing reactions in view of their personal experiences, and they had the  
12 197 opportunity to stop participation at any time. No financial or other incentives were offered to the  
13 198 participants. The Ethics Committee of Maastricht UMC+, the Netherlands, has waived the need for  
14 199 ethical approval for this study (MECT 2020-1336).

### 16 200 17 201 **Patient and public involvement**

18 202  
19 203 EFCNI, as a pan-European network of parent organisations, was the initiator of this research project and  
20 204 responsible for all phases of the study. In addition, representatives from national parent organisations  
21 205 worldwide were involved in the review of the questionnaire and in manuscript writing (as part of the  
22 206 COVID-19 Zero Separation Collaborative Group). Additionally, they supported the translation and  
23 207 dissemination of the survey in their network, and will again be involved in the dissemination of the  
24 208 results.

## 26 210 27 211 **RESULTS**

### 28 212 29 213 **Background, baseline and COVID-19 related characteristics**

30 214  
31 215 In total, 1148 participants from Australia, Brazil, Canada, China, France, Italy, Mexico, New Zealand,  
32 216 Poland, Sweden, Turkey and Ukraine were eligible for analysis (Figure 1A). Baseline characteristics of  
33 217 participants are shown in Table 1. Nearly all answers were obtained from mothers of the infant (n=1093;  
34 218 95%) and the majority of participants was between 30 and 39 years old (53%). Most infants were born  
35 219 very preterm (28–<32 weeks of gestation; 35%) or moderate to late preterm infants (32–<37 weeks of  
36 220 gestation; 37%), and were born through caesarean section (72%). Almost 50% of the infants required  
37 221 special/intensive care for over five weeks at the time of answering the questionnaire (Table 1). Baseline  
38 222 characteristics of participants per country are pre-specified in Supplementary Table S1 and partly  
39 223 differed on country-level.

40 224  
41 225 Overall, 41% of the respondents faced lockdown measures in their country/region at the time of birth,  
42 226 30% were encouraged to adhere to social distancing and 13% were located in countries/regions where  
43 227 precautions were advised or quarantine was implemented (11%, Table 1). In total, 2% of the respondents  
44 228 and 2% of the respondents' partners had tested positive for COVID-19, with the highest numbers in  
45 229 Mexico (12% for both options). Overall, five newborns tested positive for COVID-19 (Table 1).

46 230  
47 231 Supplementary Table S2 provides an overview on each countries' demographics, including GDP per  
48 232 capita, the preterm birth rate, female educational attainment, maternal and under-5 mortality, sanitation,  
49 233 COVID-19 cases as of 29 November 2020 and the average government response stringency index based  
50 234 on the Oxford COVID-19 Government Response Tracker (OxCGRT) [43] between August and  
51 235 November 2020. Overall, Turkey (12%) and Brazil (11%) have the highest observed preterm birth rate,  
52 236 while it is lowest in Sweden (6%) [9]. Data from the World Bank [44] and the UN Inter-agency Group  
53 237 for Child Mortality Estimation [45] from 2019 shows that Brazil also has the highest rate of maternal  
54 238 mortality per 100,000 live births (60) and the highest under-5 mortality rate per 1,000 live births,  
55 239 together with Mexico (14). As of 29 November 2020, cumulative COVID-19 cases per 1 million  
56 240 population were highest in France (33,242), followed by Brazil (29,349). Cases were lowest in China  
57 241 (63) and New Zealand (352). The average government response stringency index [43] was highest in  
58 242 China (80) and lowest in New Zealand (22).

59 243  
60 244

244 Table 1. Baseline and COVID-19 characteristics of participants

|                                                                                | Total           |
|--------------------------------------------------------------------------------|-----------------|
| <b>Age of respondent (years)</b>                                               | <b>n = 1146</b> |
| <20                                                                            | 5 (0%)          |
| 20–29                                                                          | 468 (41%)       |
| 30–39                                                                          | 608 (53%)       |
| >40                                                                            | 65 (6%)         |
| <b>Gestational age at birth (weeks)</b>                                        | <b>n = 1107</b> |
| Early preterm: <28                                                             | 270 (24%)       |
| Very preterm: 28–<32                                                           | 389 (35%)       |
| Moderate to late preterm: 32–<37                                               | 412 (37%)       |
| Term: 37–42                                                                    | 36 (3%)         |
| <b>Multiple pregnancy</b>                                                      | <b>n = 1112</b> |
| Yes                                                                            | 180 (16%)       |
| No                                                                             | 932 (84%)       |
| <b>Birth mode</b>                                                              | <b>n = 1111</b> |
| Vaginal birth                                                                  | 301 (27%)       |
| C-section                                                                      | 804 (72%)       |
| Both (e.g. in case of multiple pregnancy)                                      | 6 (1%)          |
| <b>Birth weight of the baby (grams)</b>                                        | <b>n = 1110</b> |
| <1000                                                                          | 290 (26%)       |
| 1000–1500                                                                      | 373 (34%)       |
| >1500–2500                                                                     | 374 (34%)       |
| >2500                                                                          | 71 (6%)         |
| Don't know the birth weight                                                    | 2 (0%)          |
| <b>Duration of special/intensive care (weeks) (at time of data collection)</b> | <b>n = 1112</b> |
| <1                                                                             | 81 (7%)         |
| 1–3                                                                            | 251 (23%)       |
| >3–5                                                                           | 277 (25%)       |
| >5                                                                             | 503 (45%)       |
| <b>COVID-19 situation in country/region at time of baby's birth</b>            | <b>n = 1071</b> |
| No major concern                                                               | 49 (5%)         |
| Precautions                                                                    | 137 (13%)       |
| Social distancing                                                              | 325 (30%)       |
| Lockdown                                                                       | 438 (41%)       |
| Quarantine                                                                     | 122 (11%)       |
| <b>Have you tested positive for Coronavirus/COVID-19?</b>                      | <b>n = 1084</b> |
| Yes                                                                            | 27 (2%)         |
| No                                                                             | 1057 (98%)      |
| <b>Has your partner tested positive for Coronavirus/COVID-19?</b>              | <b>n = 1086</b> |
| Yes                                                                            | 25 (2%)         |
| No                                                                             | 1039 (96%)      |
| Don't know                                                                     | 22 (2%)         |
| <b>Has your baby tested positive for Coronavirus/COVID-19?</b>                 | <b>n = 1087</b> |
| Yes                                                                            | 5 (0%)          |
| No                                                                             | 1035 (95%)      |
| Don't know                                                                     | 47 (4%)         |

245

246

247 **Prenatal care and birth**

248

249 Significant variations regarding the presence of support persons during pregnancy-related appointments  
 250 and birth could be observed (Figure 1B and Figure 1C). In total, 41% of all participants were not allowed  
 251 to have a companion present during pregnancy-related appointments. This number was highest in  
 252 Sweden and Poland (>60%) and lowest in Australia (20%). During birth, 57% of the respondents were  
 253 not permitted to have another person present (Figure 1C). In Mexico, 87% of the women gave birth  
 254 without a supporting companion. In Poland, this applied to 90% of the respondents. In Australia, New  
 255 Zealand and Sweden >90% of the women were permitted to have another person present, and in  
 256 Australia 90% of the accompanying persons could stay for the entire labour (Supplementary Table S3).  
 257 Likewise, in Brazil, China and New Zealand >85% of the accompanying persons could stay during the  
 258 entire labour (Supplementary Table S3).

259

260 *[Figure 1 here]*

261

262

263 **Presence with the newborn and skin-to-skin care**

264



1  
2  
3 265 In total, 82% of the participants responded that the COVID-19 pandemic affected the facility policy  
4 266 around their ability to be present with the newborn receiving special/intensive care (Table 2). Parental  
5 267 presence was one of the areas affected most, with 27% percent of the total respondents indicating that  
6 268 no-one was allowed to be present with the newborn, with highest numbers in China (52%) and Turkey  
7 269 (49%).  
8 270

9 271 Analysis showed country-specific differences regarding access of family members to the hospitalised  
10 272 infant: around 80→90% of participants from Australia, Canada, France, New Zealand and Sweden  
11 273 answered that both parents were allowed access. Lower proportions were observed for the remaining  
12 274 countries, with the lowest numbers in China where 35% of the mothers and 29% of the fathers were  
13 275 permitted to be present with the newborn (Table 2). More than half of the participants in Australia,  
14 276 China, France, New Zealand, and Sweden indicated that more than one person was allowed to be present  
15 277 with the newborn at the same time (Table 2).  
16 278

17 279 Overall, 32% of the respondents could see their newborn all the time (24/7), and 13% multiple times per  
18 280 day (Figure 1A). More than 20% were not allowed to see their newborn at any time, which was  
19 281 particularly observed in China (85%) and also reported by respondents from Mexico (14%), Poland  
20 282 (28%), Turkey (36%) and Ukraine (15%, Figure 1A). While more than half of the respondents from  
21 283 Poland were provided with either photos, livestream options or recorded videos as alternative tools to  
22 284 being present, parents from Mexico (78%), Turkey (55%) and Ukraine (81%) were mostly not offered  
23 285 any alternatives (Supplementary Table S4).  
24 286

25 287 While in Australia, Canada, France, New Zealand and Sweden more than 80% of the respondents had  
26 288 unlimited access to their newborn, other countries implemented duration restrictions (Table 2).  
27 289 Significantly high proportions of being “not at all” allowed to be present with the infant were noted in  
28 290 China (87%) and Turkey (34%) (Supplementary Table S5). In Mexico, Turkey and Ukraine more than  
29 291 half of the respondents indicated that they were allowed to see their baby for up to one hour. More than  
30 292 70% of the respondents from Canada, China, Mexico, Poland, Turkey and Ukraine felt that the measures  
31 293 implemented due to COVID-19 made it more difficult for them to be present, and more than 70% from  
32 294 China, Mexico, Poland and Turkey to be interactive with their newborn, e.g. regarding skin-to-skin  
33 295 contact (Table 2).  
34 296

35 297 The possibilities to have skin-to-skin contact with the infant differed between countries, with  
36 298 significantly high proportions of respondents in Mexico (47%) and Turkey (49%) indicating that skin-  
37 299 to-skin care was not initiated during the time in the hospital (Supplementary Table S5). In China, most  
38 300 respondents (85%) answered that skin-to-skin care had not yet been initiated (if still in the hospital). In  
39 301 the remaining countries, skin-to-skin care was mainly initiated after the first day but during the first  
40 302 week with few exceptions having high answer rates with regards to an early initiation (immediately after  
41 303 birth or on the first day) such as France. In Sweden and France >80% of the mothers were permitted to  
42 304 have skin-to-skin contact with their newborn as often as they wanted. While >95% of the respondents  
43 305 from Australia, Brazil, Canada, France, New Zealand and Sweden could touch their newborn in the  
44 306 incubator or bed as often as they wanted or at least once per day, 92% of the participants in China, and  
45 307 60% in Turkey were not permitted to do so (Table 2).  
46 308

47 309 The involvement in the care was perceived differently by parents across countries. While participants  
48 310 from Australia, France, New Zealand and Sweden felt they were highly involved in the care by  
49 311 medical and nursing staff (>80%), more than 70% of participants in China, Poland, Turkey and  
50 312 Ukraine felt that staff did neither include them nor their partner in the care. In addition, while the  
51 313 majority of participants from Sweden (85%) responded that also their partner was highly involved by  
52 314 medical and nursing staff, this was not the case for participants in Turkey.  
53  
54  
55  
56  
57  
58  
59  
60

Table 2. Presence with the newborn and skin-to-skin care

|                                                                                                                                                                                                                                                                           | Total              | Australia         | Brazil           | Canada           | China            | France            | Italy            | Mexico           | New Zealand      | Poland            | Sweden            | Turkey            | Ukraine           |
|---------------------------------------------------------------------------------------------------------------------------------------------------------------------------------------------------------------------------------------------------------------------------|--------------------|-------------------|------------------|------------------|------------------|-------------------|------------------|------------------|------------------|-------------------|-------------------|-------------------|-------------------|
| <b>Do you know if the Coronavirus/COVID-19 situation affected the facility policy around your ability to be present with the baby receiving special/intensive care?</b>                                                                                                   |                    |                   |                  |                  |                  |                   |                  |                  |                  |                   |                   |                   |                   |
|                                                                                                                                                                                                                                                                           | n = 991            | n = 55            | n = 34           | n = 49           | n = 52           | n = 110           | n = 34           | n = 37           | n = 31           | n = 132           | n = 73            | n = 288           | n = 96            |
| There were no changes                                                                                                                                                                                                                                                     | 80 (8%)            | 7 (13%)           | 2 (6%)           | 2 (4%)           | 5 (10%)          | 12 (11%)          | 4 (12%)          | 2 (5%)           | 4 (13%)          | 4 (3%)            | 23 (32%)          | 10 (3%)           | 5 (5%)            |
| Restrictions were implemented                                                                                                                                                                                                                                             | 816 (82%)          | 44 (80%)          | 30 (88%)         | 44 (90%)         | 36 (69%)         | 94 (85%)          | 27 (79%)         | 34 (92%)         | 25 (81%)         | 118 (89%)         | 44 (60%)          | 241 (84%)         | 79 (82%)          |
| I don't know if there were changes                                                                                                                                                                                                                                        | 95 (10%)           | 4 (7%)            | 2 (6%)           | 3 (6%)           | 11 (21%)         | 4 (4%)            | 3 (9%)           | 1 (3%)           | 2 (6%)           | 10 (8%)           | 6 (8%)            | 37 (13%)          | 12 (13%)          |
| <b>Who was allowed to be present with your baby receiving special/intensive care? (multiple answers possible)</b>                                                                                                                                                         |                    |                   |                  |                  |                  |                   |                  |                  |                  |                   |                   |                   |                   |
|                                                                                                                                                                                                                                                                           | n = 991            | n = 55            | n = 34           | n = 49           | n = 52           | n = 110           | n = 34           | n = 37           | n = 31           | n = 132           | n = 73            | n = 288           | n = 96            |
| <b>Sum of multiple answers</b>                                                                                                                                                                                                                                            | <b>1497 (151%)</b> | <b>112 (204%)</b> | <b>57 (168%)</b> | <b>89 (182%)</b> | <b>73 (140%)</b> | <b>215 (195%)</b> | <b>59 (174%)</b> | <b>57 (154%)</b> | <b>56 (181%)</b> | <b>155 (117%)</b> | <b>145 (199%)</b> | <b>368 (128%)</b> | <b>111 (116%)</b> |
| Mother                                                                                                                                                                                                                                                                    | 680 (69%)          | 52 (95%)          | 30 (88%)         | 44 (90%)         | 18 (35%)         | 101 (92%)         | 30 (88%)         | 25 (68%)         | 28 (90%)         | 84 (64%)          | 60 (82%)          | 142 (49%)         | 66 (69%)          |
| Father/partner                                                                                                                                                                                                                                                            | 501 (51%)          | 54 (98%)          | 24 (71%)         | 42 (86%)         | 15 (29%)         | 106 (96%)         | 27 (79%)         | 23 (62%)         | 26 (84%)         | 19 (14%)          | 68 (93%)          | 84 (29%)          | 13 (14%)          |
| Sibling/s                                                                                                                                                                                                                                                                 | 27 (3%)            | 3 (5%)            | 0 (0%)           | 1 (2%)           | 3 (6%)           | 6 (5%)            | 0 (0%)           | 0 (0%)           | 1 (3%)           | 0 (0%)            | 12 (16%)          | 0 (0%)            | 1 (1%)            |
| Other family members                                                                                                                                                                                                                                                      | 14 (1%)            | 3 (5%)            | 2 (6%)           | 1 (2%)           | 3 (6%)           | 0 (0%)            | 0 (0%)           | 1 (3%)           | 1 (3%)           | 0 (0%)            | 3 (4%)            | 0 (0%)            | 0 (0%)            |
| Friends                                                                                                                                                                                                                                                                   | 2 (0%)             | 0 (0%)            | 0 (0%)           | 1 (2%)           | 0 (0%)           | 0 (0%)            | 0 (0%)           | 0 (0%)           | 0 (0%)           | 0 (0%)            | 1 (1%)            | 0 (0%)            | 0 (0%)            |
| No one                                                                                                                                                                                                                                                                    | 265 (27%)          | 0 (0%)            | 1 (3%)           | 0 (0%)           | 27 (52%)         | 2 (2%)            | 2 (6%)           | 8 (22%)          | 0 (0%)           | 52 (39%)          | 1 (1%)            | 141 (49%)         | 31 (32%)          |
| I don't know                                                                                                                                                                                                                                                              | 8 (1%)             | 0 (0%)            | 0 (0%)           | 0 (0%)           | 7 (13%)          | 0 (0%)            | 0 (0%)           | 0 (0%)           | 0 (0%)           | 0 (0%)            | 0 (0%)            | 1 (0%)            | 0 (0%)            |
| <b>Could more than one person be present with the baby at the same time?</b>                                                                                                                                                                                              |                    |                   |                  |                  |                  |                   |                  |                  |                  |                   |                   |                   |                   |
|                                                                                                                                                                                                                                                                           | n = 990            | n = 55            | n = 34           | n = 49           | n = 52           | n = 110           | n = 34           | n = 37           | n = 31           | n = 130           | n = 74            | n = 288           | n = 96            |
| Yes                                                                                                                                                                                                                                                                       | 326 (33%)          | 31 (56%)          | 9 (26%)          | 20 (41%)         | 27 (52%)         | 70 (64%)          | 2 (6%)           | 2 (5%)           | 16 (52%)         | 5 (4%)            | 62 (84%)          | 66 (23%)          | 16 (17%)          |
| No                                                                                                                                                                                                                                                                        | 664 (67%)          | 24 (44%)          | 25 (74%)         | 29 (59%)         | 25 (48%)         | 40 (36%)          | 32 (94%)         | 35 (95%)         | 15 (48%)         | 125 (96%)         | 12 (16%)          | 222 (77%)         | 80 (83%)          |
| <b>How long were you allowed to see your baby per visit?</b>                                                                                                                                                                                                              |                    |                   |                  |                  |                  |                   |                  |                  |                  |                   |                   |                   |                   |
|                                                                                                                                                                                                                                                                           | n = 989            | n = 55            | n = 34           | n = 49           | n = 52           | n = 109           | n = 34           | n = 37           | n = 31           | n = 131           | n = 73            | n = 288           | n = 96            |
| Up to an hour                                                                                                                                                                                                                                                             | 338 (34%)          | 1 (2%)            | 11 (32%)         | 0 (0%)           | 2 (4%)           | 0 (0%)            | 11 (32%)         | 31 (84%)         | 0 (0%)           | 44 (34%)          | 0 (0%)            | 186 (65%)         | 52 (54%)          |
| More than one hour, up to three hours                                                                                                                                                                                                                                     | 41 (4%)            | 2 (4%)            | 1 (3%)           | 0 (0%)           | 4 (8%)           | 5 (5%)            | 3 (9%)           | 1 (3%)           | 0 (0%)           | 22 (17%)          | 0 (0%)            | 2 (1%)            | 1 (1%)            |
| More than three hours, but not unlimited                                                                                                                                                                                                                                  | 51 (5%)            | 5 (9%)            | 5 (15%)          | 2 (4%)           | 1 (2%)           | 15 (14%)          | 3 (9%)           | 0 (0%)           | 4 (13%)          | 4 (3%)            | 2 (3%)            | 1 (0%)            | 9 (9%)            |
| Unlimited                                                                                                                                                                                                                                                                 | 360 (36%)          | 47 (85%)          | 16 (47%)         | 47 (96%)         | 0 (0%)           | 88 (81%)          | 15 (44%)         | 1 (3%)           | 27 (87%)         | 27 (21%)          | 70 (96%)          | 2 (1%)            | 20 (21%)          |
| Not at all                                                                                                                                                                                                                                                                | 199 (20%)          | 0 (0%)            | 1 (3%)           | 0 (0%)           | 45 (87%)         | 1 (1%)            | 2 (6%)           | 4 (11%)          | 0 (0%)           | 34 (26%)          | 1 (1%)            | 97 (34%)          | 14 (15%)          |
| <b>Do you feel that the measures that were implemented due to Coronavirus/COVID-19 (e.g. restrictions by hospital management) made it more difficult for you to be present with your baby?</b>                                                                            |                    |                   |                  |                  |                  |                   |                  |                  |                  |                   |                   |                   |                   |
|                                                                                                                                                                                                                                                                           | n = 990            | n = 55            | n = 34           | n = 48           | n = 51           | n = 110           | n = 34           | n = 37           | n = 31           | n = 132           | n = 74            | n = 288           | n = 96            |
| Yes                                                                                                                                                                                                                                                                       | 726 (73%)          | 33 (60%)          | 18 (53%)         | 37 (77%)         | 39 (76%)         | 61 (55%)          | 19 (56%)         | 35 (95%)         | 20 (65%)         | 112 (85%)         | 14 (19%)          | 263 (91%)         | 75 (78%)          |
| No, not more difficult                                                                                                                                                                                                                                                    | 192 (19%)          | 17 (31%)          | 15 (44%)         | 10 (21%)         | 3 (6%)           | 42 (38%)          | 14 (41%)         | 1 (3%)           | 7 (23%)          | 17 (13%)          | 46 (62%)          | 11 (4%)           | 9 (9%)            |
| No, there were no restrictive measures in place                                                                                                                                                                                                                           | 39 (4%)            | 4 (7%)            | 1 (3%)           | 1 (2%)           | 0 (0%)           | 4 (4%)            | 1 (3%)           | 1 (3%)           | 3 (10%)          | 2 (2%)            | 11 (15%)          | 3 (1%)            | 8 (8%)            |
| Don't know                                                                                                                                                                                                                                                                | 33 (3%)            | 1 (2%)            | 0 (0%)           | 0 (0%)           | 9 (18%)          | 3 (3%)            | 0 (0%)           | 0 (0%)           | 1 (3%)           | 1 (1%)            | 3 (4%)            | 11 (4%)           | 4 (4%)            |
| <b>Do you feel that the measures that were implemented due to Coronavirus/COVID-19 (e.g. restrictions by hospital management) made it more difficult for you to be interactive with your baby (e.g. skin-to-skin contact or being involved in the care of your baby)?</b> |                    |                   |                  |                  |                  |                   |                  |                  |                  |                   |                   |                   |                   |
|                                                                                                                                                                                                                                                                           | n = 989            | n = 55            | n = 34           | n = 49           | n = 51           | n = 110           | n = 34           | n = 37           | n = 31           | n = 132           | n = 74            | n = 286           | n = 96            |
| Yes                                                                                                                                                                                                                                                                       | 634 (64%)          | 13 (24%)          | 15 (44%)         | 27 (55%)         | 38 (75%)         | 41 (37%)          | 21 (62%)         | 36 (97%)         | 9 (29%)          | 106 (80%)         | 9 (12%)           | 266 (93%)         | 53 (55%)          |



|                                                                                                                                                  | Total           | Australia     | Brazil        | Canada        | China         | France         | Italy         | Mexico        | New Zealand   | Poland         | Sweden        | Turkey         | Ukraine        |
|--------------------------------------------------------------------------------------------------------------------------------------------------|-----------------|---------------|---------------|---------------|---------------|----------------|---------------|---------------|---------------|----------------|---------------|----------------|----------------|
| No, not more difficult                                                                                                                           | 258 (26%)       | 31 (56%)      | 16 (47%)      | 16 (33%)      | 4 (8%)        | 53 (48%)       | 11 (32%)      | 0 (0%)        | 13 (42%)      | 22 (17%)       | 46 (62%)      | 11 (4%)        | 35 (36%)       |
| No, there were no restrictive measures in place                                                                                                  | 72 (7%)         | 10 (18%)      | 2 (6%)        | 5 (10%)       | 0 (0%)        | 15 (14%)       | 1 (3%)        | 1 (3%)        | 9 (29%)       | 3 (2%)         | 18 (24%)      | 4 (1%)         | 4 (4%)         |
| Don't know                                                                                                                                       | 25 (3%)         | 1 (2%)        | 1 (3%)        | 1 (2%)        | 9 (18%)       | 1 (1%)         | 1 (3%)        | 0 (0%)        | 0 (0%)        | 1 (1%)         | 1 (1%)        | 5 (2%)         | 4 (4%)         |
| <b>When was skin-to-skin contact with your baby and one of the parents initiated (e.g. holding the baby on the chest, kangaroo mother care)?</b> |                 |               |               |               |               |                |               |               |               |                |               |                |                |
|                                                                                                                                                  | <b>n = 1044</b> | <b>n = 56</b> | <b>n = 33</b> | <b>n = 49</b> | <b>n = 52</b> | <b>n = 117</b> | <b>n = 35</b> | <b>n = 38</b> | <b>n = 31</b> | <b>n = 146</b> | <b>n = 75</b> | <b>n = 308</b> | <b>n = 104</b> |
| Immediately after birth                                                                                                                          | 65 (6%)         | 7 (13%)       | 1 (3%)        | 8 (16%)       | 2 (4%)        | 13 (11%)       | 1 (3%)        | 0 (0%)        | 5 (16%)       | 7 (5%)         | 11 (15%)      | 4 (1%)         | 6 (6%)         |
| On the first day                                                                                                                                 | 99 (9%)         | 14 (25%)      | 0 (0%)        | 7 (14%)       | 0 (0%)        | 43 (37%)       | 1 (3%)        | 0 (0%)        | 5 (16%)       | 4 (3%)         | 19 (25%)      | 4 (1%)         | 2 (2%)         |
| After the first day but during the first week                                                                                                    | 236 (23%)       | 23 (41%)      | 8 (24%)       | 21 (43%)      | 0 (0%)        | 45 (38%)       | 8 (23%)       | 3 (8%)        | 14 (45%)      | 36 (25%)       | 35 (47%)      | 17 (6%)        | 26 (25%)       |
| After the first week                                                                                                                             | 244 (23%)       | 11 (20%)      | 21 (64%)      | 13 (27%)      | 4 (8%)        | 14 (12%)       | 18 (51%)      | 13 (34%)      | 7 (23%)       | 32 (22%)       | 10 (13%)      | 60 (19%)       | 41 (39%)       |
| Not so far (If still in hospital)                                                                                                                | 156 (15%)       | 1 (2%)        | 2 (6%)        | 0 (0%)        | 44 (85%)      | 1 (1%)         | 0 (0%)        | 4 (11%)       | 0 (0%)        | 19 (13%)       | 0 (0%)        | 72 (23%)       | 13 (13%)       |
| Not during the time in the hospital if discharged                                                                                                | 244 (23%)       | 0 (0%)        | 1 (3%)        | 0 (0%)        | 2 (4%)        | 1 (1%)         | 7 (20%)       | 18 (47%)      | 0 (0%)        | 48 (33%)       | 0 (0%)        | 151 (49%)      | 16 (15%)       |
| <b>How often were you permitted to have skin-to-skin contact (kangaroo mother care) with your baby?</b>                                          |                 |               |               |               |               |                |               |               |               |                |               |                |                |
|                                                                                                                                                  | <b>n = 1043</b> | <b>n = 56</b> | <b>n = 32</b> | <b>n = 49</b> | <b>n = 52</b> | <b>n = 118</b> | <b>n = 34</b> | <b>n = 38</b> | <b>n = 31</b> | <b>n = 146</b> | <b>n = 75</b> | <b>n = 308</b> | <b>n = 104</b> |
| As often as I wanted                                                                                                                             | 302 (29%)       | 18 (32%)      | 14 (44%)      | 25 (51%)      | 0 (0%)        | 99 (84%)       | 8 (24%)       | 0 (0%)        | 16 (52%)      | 12 (8%)        | 63 (84%)      | 11 (4%)        | 36 (35%)       |
| At least once per day                                                                                                                            | 227 (22%)       | 31 (55%)      | 11 (34%)      | 21 (43%)      | 2 (4%)        | 15 (13%)       | 13 (38%)      | 12 (32%)      | 12 (39%)      | 31 (21%)       | 9 (12%)       | 43 (14%)       | 27 (26%)       |
| At least once per week                                                                                                                           | 64 (6%)         | 6 (11%)       | 3 (9%)        | 2 (4%)        | 0 (0%)        | 2 (2%)         | 3 (9%)        | 4 (11%)       | 3 (10%)       | 17 (12%)       | 3 (4%)        | 18 (6%)        | 3 (3%)         |
| Less than once per week                                                                                                                          | 77 (7%)         | 0 (0%)        | 1 (3%)        | 1 (2%)        | 2 (4%)        | 1 (1%)         | 4 (12%)       | 7 (18%)       | 0 (0%)        | 24 (16%)       | 0 (0%)        | 29 (9%)        | 8 (8%)         |
| Not so far                                                                                                                                       | 373 (36%)       | 1 (2%)        | 3 (9%)        | 0 (0%)        | 48 (92%)      | 1 (1%)         | 6 (18%)       | 15 (39%)      | 0 (0%)        | 62 (42%)       | 0 (0%)        | 207 (67%)      | 30 (29%)       |
| <b>Did medical/nursing staff involve you in the care of your baby (e.g. nappy changing, feeding, temperature taking)?</b>                        |                 |               |               |               |               |                |               |               |               |                |               |                |                |
|                                                                                                                                                  | <b>n = 989</b>  | <b>n = 55</b> | <b>n = 34</b> | <b>n = 49</b> | <b>n = 51</b> | <b>n = 110</b> | <b>n = 34</b> | <b>n = 37</b> | <b>n = 31</b> | <b>n = 131</b> | <b>n = 74</b> | <b>n = 287</b> | <b>n = 96</b>  |
| Yes, to a high degree                                                                                                                            | 438 (44%)       | 44 (80%)      | 15 (44%)      | 34 (69%)      | 4 (8%)        | 102 (93%)      | 22 (65%)      | 6 (16%)       | 27 (87%)      | 48 (37%)       | 67 (91%)      | 22 (8%)        | 47 (49%)       |
| Yes, to some degree                                                                                                                              | 180 (18%)       | 10 (18%)      | 10 (29%)      | 15 (31%)      | 3 (6%)        | 7 (6%)         | 10 (29%)      | 11 (30%)      | 4 (13%)       | 29 (22%)       | 7 (9%)        | 53 (18%)       | 21 (22%)       |
| No, not at all                                                                                                                                   | 364 (37%)       | 1 (2%)        | 9 (26%)       | 0 (0%)        | 40 (78%)      | 1 (1%)         | 2 (6%)        | 20 (54%)      | 0 (0%)        | 53 (40%)       | 0 (0%)        | 211 (74%)      | 27 (28%)       |
| Don't know                                                                                                                                       | 7 (1%)          | 0 (0%)        | 0 (0%)        | 0 (0%)        | 4 (8%)        | 0 (0%)         | 0 (0%)        | 0 (0%)        | 0 (0%)        | 1 (1%)         | 0 (0%)        | 1 (0%)         | 1 (1%)         |
| <b>Did medical/nursing staff involve your partner in the care of your baby?</b>                                                                  |                 |               |               |               |               |                |               |               |               |                |               |                |                |
|                                                                                                                                                  | <b>n = 990</b>  | <b>n = 55</b> | <b>n = 34</b> | <b>n = 49</b> | <b>n = 51</b> | <b>n = 110</b> | <b>n = 34</b> | <b>n = 37</b> | <b>n = 31</b> | <b>n = 131</b> | <b>n = 74</b> | <b>n = 288</b> | <b>n = 96</b>  |
| Yes, to a high degree                                                                                                                            | 274 (28%)       | 35 (64%)      | 4 (12%)       | 29 (59%)      | 3 (6%)        | 87 (79%)       | 19 (56%)      | 5 (14%)       | 18 (58%)      | 2 (2%)         | 63 (85%)      | 4 (1%)         | 5 (5%)         |
| Yes, to some degree                                                                                                                              | 121 (12%)       | 18 (33%)      | 9 (26%)       | 14 (29%)      | 4 (8%)        | 15 (14%)       | 8 (24%)       | 6 (16%)       | 6 (19%)       | 10 (8%)        | 7 (9%)        | 18 (6%)        | 6 (6%)         |
| No, not at all                                                                                                                                   | 567 (57%)       | 1 (2%)        | 19 (56%)      | 6 (12%)       | 39 (76%)      | 6 (5%)         | 6 (18%)       | 24 (65%)      | 5 (16%)       | 114 (87%)      | 3 (4%)        | 263 (91%)      | 81 (84%)       |
| Don't know                                                                                                                                       | 17 (2%)         | 0 (0%)        | 2 (6%)        | 0 (0%)        | 5 (10%)       | 0 (0%)         | 1 (3%)        | 1 (3%)        | 0 (0%)        | 4 (3%)         | 0 (0%)        | 1 (0%)         | 3 (3%)         |
| I don't have a partner                                                                                                                           | 11 (1%)         | 1 (2%)        | 0 (0%)        | 0 (0%)        | 0 (0%)        | 2 (2%)         | 0 (0%)        | 1 (3%)        | 2 (6%)        | 1 (1%)         | 1 (1%)        | 2 (1%)         | 1 (1%)         |

Blue: 95% confidence interval: significantly higher than total (for detailed results see Supplementary Table S5)

Green: 95% confidence interval: significantly lower than total (for detailed results see Supplementary Table S5)

## 318 **Nutrition and breastfeeding**

319  
320 In total, 89% of the respondents answered that their newborns were fed with breastmilk (breastfeeding  
321 or pumped milk), 22% received donor human milk and 34% were fed with infant formula (multiple  
322 response question; Supplementary Table S6). Initiation of breastfeeding was highly (50%) or somewhat  
323 (26%) encouraged by medical/nursing staff in most countries (Supplementary Table S6). Overall, 18%  
324 indicated that breastfeeding was not encouraged at all. This lack of encouragement was especially noted  
325 in Italy (32%), Poland and Turkey (>25%). However, newborns in Italy and Turkey were in over 90%  
326 of cases still exclusively or partly breastfed or provided with mother's own pumped/expressed  
327 breastmilk in the first weeks after birth (Supplementary Table S6).

328  
329 Also, the initiation of breastfeeding differed across countries. In Canada, first breastfeeding or provision  
330 of mother's own pumped/expressed breastmilk took place on the first day (57%) or after the first day  
331 but during the first week (37%). Likewise, in Australia, France and New Zealand, >50% of the  
332 respondents indicated that breastfeeding was initiated on the first day. In Mexico, 50% of the babies  
333 received first breastmilk after the first week. In Brazil, France, Italy and Ukraine more than 20% of the  
334 babies were first breastfed after the first week (Supplementary Table S6).

335  
336 In most countries, the respondents were allowed to bring expressed milk from home to the unit (76%).  
337 In Brazil, the milk had to be expressed at the hospital (71%). In New Zealand, Poland, Sweden and  
338 Ukraine more than 10% of the respondents indicated that they were not allowed to bring expressed milk  
339 from home to the unit.

## 340 341 **Health information and communication**

342  
343 Almost 90% of the respondents felt that they had received adequate general health information about  
344 their newborn during the hospital stay either to a high or some degree (Supplementary Table S7). Parents  
345 from Australia, Brazil, Canada, France, Italy, New Zealand and Sweden indicated to a high degree of  
346 having received general health information (>50%). While 84% of the respondents from China indicated  
347 that they received general health information to a high or to some degree, 10% answered that they did  
348 not receive any information.

349  
350 Almost 80% of the respondents received information about their newborn multiple times per day or once  
351 per day (Supplementary Table S7). General health information was mostly communicated to the parents  
352 in face-to-face meetings with medical/nursing staff (76%) or via phone calls (50%).

353  
354 Overall, more than 60% of the respondents from Italy felt to a high degree that they had received  
355 adequate information about how to protect themselves and their newborn from a COVID-19  
356 transmission. In China, 50% felt that they knew how to prevent transmission. A similar result could be  
357 observed at discharge from the hospital: in Italy and China where about 40% of the respondents indicated  
358 that they received adequate information about COVID-19 to a high degree. In Poland, almost 40% of  
359 the respondents felt they had not received any information about COVID-19 when being discharged  
360 from the hospital (Supplementary Table S7).

## 361 362 **Parents' mental health and support**

363  
364 More than three-quarters of the respondents indicated being worried about the COVID-19 situation  
365 during pregnancy. For 9% of the respondents, COVID-19 was not an issue, and 10% did not worry about  
366 the virus at all. While most respondents from Mexico worried about COVID-19 during pregnancy to a  
367 high degree (71%), this was only the case for 18% of the respondents from China (Figure 2A). After  
368 birth, 90% of the total respondents worried about the COVID-19 situation to a high or to some degree.  
369 Parents from Brazil worried to a high degree (94%), while more than half of the parents from China  
370 were not at all concerned (Figure 2A).

371  
372 Overall, 42% of the respondents felt they were adequately informed about mental health support to a  
373 high or some degree (Figure 2B). However, 38% felt they were not at all informed, and in 17% of the

cases there was no mental health support. The results show that proportions of having received adequate information were highest in Australia and lowest in Turkey and Mexico. The absence of mental health support was highest in Ukraine and Poland (34%). If support was offered, most parents received psychological counselling (29%) and help from a social worker (19%). In total, 48% of the respondents answered that no support was offered (Supplementary Table S8).

[Figure 2 here]

## DISCUSSION

The COVID-19 pandemic has disrupted healthcare systems, and further challenged the already inadequate application of an IFCDC approach in many countries worldwide. Measures to stem virus transmission have resulted in (additional) restrictions affecting preterm, sick, and low birthweight infants, one of the most vulnerable groups of patients [18,22]. Highlighting the importance of IFCDC and by taking a patient/parent-centred approach, this study has identified parents' perceptions to different policy measures across 12 countries, with severe implications for both IFCDC as well as the health outcomes of vulnerable infants born during the pandemic [28–30]. In what follows, we will reflect upon the key findings that emerged from our multi-country research, covering data from Australia, Brazil, Canada, China, France, Italy, Mexico, New Zealand, Poland, Sweden, Turkey, and Ukraine.

Perinatal care was impacted by the pandemic and respective restrictions, in particular with regard to having support persons present during both pregnancy-related appointments and birth. Our findings have shown that while some countries have hardly restricted the presence of accompanying persons during birth (such as Australia, New Zealand, Canada and Sweden), in many other countries it was not permitted to have a support person present (as for example in >60% in China, Ukraine, Turkey, and >85% in Poland and Mexico). This restriction finally leaves the person giving birth without any emotional, informational, and practical support from a person of trust. In contrast with such pandemic-related restrictions, previous research showed that having a support person present fulfilling these tasks facilitates non-pharmacological pain relief as well as bonding, and improves maternal well-being [29,30,46,47], which clearly highlights the benefits as well as the importance of labour companionship. In its recommendations on "Intrapartum care for a positive childbirth experience", the WHO advocates for a companion of choice for all women throughout labour and childbirth [48] also during the pandemic [49]. Thus, global health agendas do no longer exclusively focus on the reduction of birth complications, yet they have expanded their scope and have started to emphasise the importance of maternal and newborn health and well-being, and that mother and child should also thrive and enjoy their full potential of health [33]. Partners should therefore be allowed access to enable a respectful childbirth experience, yet this opportunity is too often being withheld as our research showed.

This study also revealed shortcomings regarding presence and involvement of family members while the newborn needed special/intensive care, which confirms results of similar studies [14,22,24,33,50]. As we have learned from our findings [18], restrictions were implemented and, besides some exceptions (e.g. in Australia, Canada, France, New Zealand and Sweden), in seven out of 12 countries, partly only the mother was allowed to be present with the newborn. The other parent, however, was less likely to have access with strict access restrictions e.g. in Poland and Ukraine, and siblings as well as other family members were hardly ever allowed in the neonatal intensive care unit in any country. Most importantly, our results showed that there are countries (e.g. Turkey and China) where nobody (not even father or mother) was allowed to be with the hospitalised infant. Thus, extremely strict access measures following a severe separation policy between parents and their vulnerable infant were implemented. Parental-infant bonding, however, can only take place if the parents are present and given the opportunity to care for their newborn [34,51–53]. Not including parents in caring, planning, and participation in decision-making processes pertaining to their newborn, will less likely establish feelings of competency and a healthy parent-child relationship [51]. Research shows that if the parents feel empowered to care for the child, maternal stress and anxiety can be reduced and hospital stays may be shorter [54,55]. Despite this, involving parents and seeing them as primary caregivers also depends on the mind-set of healthcare professionals [16].

430  
431 Separating family members, and in particular parents from their newborns has severe consequences for  
432 the care provision and health outcomes of the vulnerable infant, for example due to limited possibilities  
433 for skin-to-skin care and KMC [22,53]. For almost one quarter of the total respondents, skin-to-skin  
434 contact with the newborn was not initiated during the time in the hospital, with particular strict measures  
435 in Mexico and Turkey, even though the benefits of practices such as KMC are undisputed [16,56–60].  
436 The positive influence on developmental outcomes far outweighs the potential risk of death due to  
437 COVID-19 as research highlights [31]. Survival benefits of immediate KMC seem to be higher  
438 compared to those of conventional care in an incubator or a radiant warmer, as a recent randomised  
439 control trial conducted in low-resource hospital shows [60], making further research also in well-  
440 resourced settings necessary. These findings highlight that newborns should not be separated from their  
441 parents; our study unfortunately shows that the separation of parents and their newborn is (still) common  
442 practice as a minimum during the pandemic.

443  
444 Even though a large majority of parents felt adequately informed about their newborn, almost 40% of  
445 the total respondents were not involved at all in the care of their baby (e.g. nappy changing, feeding,  
446 temperature taking) and almost 60% indicated that their partner was not involved in caring for the  
447 newborn, leaving them without any practice when the infant was discharged. Strong country-specific  
448 differences show that the involvement of the parents was encouraged more in Australia, Canada, France,  
449 Italy, New Zealand and Sweden in comparison to China, Poland, Turkey and Ukraine. Moreover, the  
450 implemented measures during COVID-19 made parental presence and interaction with the baby more  
451 difficult for parents in Mexico, Poland and Turkey than in Australia, France, New Zealand and Sweden.  
452 Although we could observe considerable country-specific differences on specific elements of IFCDC,  
453 overall, some countries such as New Zealand and Sweden, performed uniformly well, while other  
454 countries fell behind. These differences could be partly explained by the government response  
455 stringency indexes between August and November 2020 (lowest in New Zealand; highest in China;  
456 Supplementary Table S2) [43]. The differences can also be interpreted as a prioritisation of a holistic  
457 IFCDC approach in some countries which might have already put a greater focus on this care approach  
458 in the pre-pandemic phase compared to others, e.g. China [20]. However, comprehensive data on the  
459 national and international implementation of the different aspects of IFCDC is lacking [61] and thus,  
460 the results need to be interpreted with caution.

461  
462 In contrast to parental presence and skin-to-skin contact, breastfeeding does not seem to have been  
463 impacted to the same degree. Despite various implemented restrictions, our data did not suggest that the  
464 ability to breastfeed or breastfeeding in general was discouraged by nursing staff across the 12 countries.  
465 Although about 30% of the parents from Italy and Mexico indicated that breastfeeding was not  
466 encouraged at all by nursing staff – against the current WHO recommendation [62] – this did not  
467 influence the number of infants being breastfed or provided with mother's own pumped or expressed  
468 breastmilk at least in the first weeks after birth (>90%). It has been outlined that globally, breastfeeding  
469 has not been prioritised and encouraged during the pandemic, e.g. due to early discharge and limited  
470 lactation support, with possible negative implications for its initiation [32,63,64]. Our data, however,  
471 implies that breastfeeding, as one element of IFCDC, was somewhat less affected by the restrictions, at  
472 least in the hospital. However, this study does not show the long-term trend and potential continuation  
473 of breastfeeding, e.g. also in case of early discharge which frequently occurred during the pandemic  
474 [21].

475  
476 Having a newborn requiring special/intensive care is in itself a stressful situation for parents, and even  
477 more so during a pandemic. Preterm birth can be associated with a number of adverse maternal  
478 psychological outcomes, among others anxiety and psychological distress [65,66]. The COVID-19  
479 pandemic, as an additional contributing factor to emotional distress and with an increased risk for  
480 psychiatric illness [67] and postnatal depression [68], makes parents of a preterm, sick or low  
481 birthweight infant increasingly vulnerable to developing mental health issues. Our results show that the  
482 COVID-19 situation was especially worrisome for parents in Brazil, Canada and Mexico after the birth  
483 of their baby. These results do not seem to be related to the cumulative COVID-19 cases or the  
484 government response stringency index in the respective countries (Supplementary Table S2). At the  
485 same time, parents from Brazil, Canada and Mexico, together with those from Turkey, did not feel well



1  
2  
3 486 informed about mental health and support. Early intervention is however important, and mental health  
4 487 support should be offered as early as possible and already during the hospital stay [65]. In an emergency  
5 488 situation, such as the COVID-19 pandemic, the focus on health and early supportive measures should  
6 489 be even more pronounced.  
7 490

8 491 This study has several strengths that merit attention, and contextual factors that need to be outlined. The  
9 492 cross-country approach, data collection in 12 countries and extensive outreach allowed us to acquire  
10 493 valuable and in-depth insights into parents' perspectives and experiences regarding IFCDC during the  
11 494 first year of the COVID-19 pandemic. Pre-testing of the questionnaire reduced methodological  
12 495 inaccuracies and ensured that data was collected in a sensitive way. The findings comprehensively  
13 496 reflect the parent perspective across multiple countries giving insights into country-specific differences  
14 497 which are worthwhile to derive suggestions for improvements on the global and country-specific policy  
15 498 level.  
16 499

17 500 The study has limitations that need to be acknowledged. Due to limited access and outreach possibilities  
18 501 in our network, we were not able to collect a representative set of data in particularly African and  
19 502 Southeast-Asian countries. In many countries in these regions, parent representative organisations do  
20 503 either not exist or do not have a strong lobby, which is in itself an important finding and worthwhile to  
21 504 investigate further. Setting up the study in an online format furthermore bears the risk of selection bias  
22 505 [69], and response rates could not be calculated as information on non-responders, in particular, during  
23 506 the pandemic state is not available. Due to missing demographics on neonates receiving special/intensive  
24 507 care in the different countries, we were unable to assess the representativeness of the sample. We  
25 508 furthermore acknowledge the high c-section rate in the sample, which, however, must be put in context  
26 509 as we study a high-risk population requiring admission of the infant to the NICU or special care unit  
27 510 (inclusion criterium). We are aware that participants completed the survey at different care stages (i.e.  
28 511 during/after hospitalisation) with a potential impact on the parents' perceived experiences. It also needs  
29 512 to be acknowledged that different countries, cultures, settings, income levels, political- and health care  
30 513 systems, as well as the individual countries' contribution to the full sample comprise a potential risk of  
31 514 confounding bias. The reported overall percentages are influenced by the number of responses per  
32 515 country (countries with more responses influence the total more) and could not be weighed in another  
33 516 meaningful way. Thereby, country comparison with overall percentages needs to be interpreted with  
34 517 caution. Moreover, the calculation of confidence intervals has limitations as only one answer option per  
35 518 question was selected for further analysis to aid readability.  
36 519

37 520 The study reflects a point in time and we are unable to compare our findings to pre-pandemic contexts.  
38 521 We acknowledge that strong variation has already existed between and within countries in the field of  
39 522 newborn care, in particular regarding IFCDC implementation [61], which is not exclusively related to  
40 523 the COVID-19 pandemic. Additionally, the respective pandemic situation, geographical, climatic and  
41 524 environmental aspects, as well as containment strategies vary between (and sometimes even within)  
42 525 countries and might have influenced on the one hand, the COVID-19 related policy approach and on the  
43 526 other hand, the results in the respective countries [43,70]. This has to be acknowledged when comparing  
44 527 results between countries and interpreting potential implications of the COVID-19 incidence on IFCDC  
45 528 on a country level.  
46 529

47 530

## 51 531 **CONCLUSION**

52 532

53 533 To the best of our knowledge, this is the first multi-country comparison of parents' experiences  
54 534 regarding special/intensive care for newborns during the first year of the COVID-19 pandemic on a  
55 535 country level. The pandemic has challenged healthcare systems leading to disruptions in the care of the  
56 536 most vulnerable groups of patients, namely preterm, sick, and low birthweight infants. Pandemic related  
57 537 restrictions are certainly necessary to prevent and reduce transmission of SARS-CoV-2. However,  
58 538 restrictions in parental presence and the missing possibility for skin-to-skin contact, together with  
59 539 lacking mental health support are global health drawbacks threatening newborn survival, quality of life  
60 540 of survivors and their families, and hinder the achievement of the 2030 Development Agenda. This study  
541 541 provides unique opportunities for public health experts, policy makers, and healthcare professionals

alike to learn from country-specific differences and in-depth insights and consequences from different approaches. It is essential to listen to and acknowledge parents' voices and experiences. Immediate action is necessary, including the reconsideration of implemented restrictions to strengthen an IFCDC approach, both during and in the absence of a global crisis [71,72]. This action requires a set of measures, including a safe and supportive care environment during and after pregnancy, labour and birth, and the implementation of a zero separation and family-inclusive policy in hospitals.

### Acknowledgements

We thank all study respondents and very much appreciate their time and invaluable commitment. We also thank all representatives of national parent organisations and experts, who have supported translation and dissemination of the survey.

### Collaborators

COVID-19 Zero Separation Collaborative Group (in alphabetical order): Mandy Daly (NIDCAP, USA and Irish Neonatal Health Alliance, Ireland), Camilla Gizzi (UENPS, Department of Pediatrics - Sandro Pertini Hospital, Rome, Italy), Agnes van den Hoogen (ESPR, Geneva, Switzerland, COINN, Utrecht University and UMC Utrecht, The Netherlands), Gigi Khonyongwa-Fernandez (NICU Parent Network (NPN), USA), Mary Kinney (University of the Western Cape, South Africa), Kerstin Mondry (European Foundation for the Care of Newborn Infants (EFCNI), Munich, Germany), Corrado Moretti (UENPS, Emeritus Consultant in Paediatrics, Policlinico Umberto I, Sapienza University of Rome, Italy), Ilknur Okay (El Bebek Gül Bebek Derneği, Turkey), Kylie Pussell (Miracle Babies Foundation, Australia), Charles C. Roehr (ESPR, Geneva, Switzerland, and National Perinatal Epidemiology Unit, Nuffield Department of Population Health, University of Oxford, UK), Eleni Vavouraki (Ilitominon, Greece), Karen Walker (COINN, Royal Prince Alfred Hospital, University of Sydney, Australia)

### Contributors

The EFCNI scientific team conceptualised the study and set up the online-survey under the lead of JK and with critical feedback by LZ, SM, and the members of the COVID-19 Zero Separation Collaborative Group. The COVID-19 Zero Separation Collaborative Group substantially supported the recruitment of respondents. CRP and JH were responsible for the statistical analysis, with feedback by JK, AW, and LZ. JK, CRP, and JH drafted the manuscript which was shared with and continuously reviewed by AW, SM, and LZ. JK, JH, CRP, AW, LZ, and SM interpreted and had full access to the data. All authors critically revised and have read and approved the final manuscript.

### Funding

During the conduct of this project, EFCNI was supported by Novartis Pharma AG with an earmarked donation for this study (grant award number: not applicable/ NA). The research was independently conducted by the authors of this paper. The donor had no role in any step of the research project.

### Competing interests

The authors report an earmarked donation from Novartis Pharma AG during the conduct of the study.

### Patient consent for publication

Not required.

### Ethics approval

The Ethics Committee of Maastricht UMC+, the Netherlands, has waived the need for ethical approval for this study (MECT 2020-1336).

### Data availability statement

Deidentified participant data are available from the corresponding author on reasonable request (S.MaderOffice@efcni.org).

### Figures

1  
2  
3  
4  
5  
6  
7  
8  
9  
10  
11  
12  
13  
14  
15  
16  
17  
18  
19  
20  
21  
22  
23  
24  
25  
26  
27  
28  
29  
30  
31  
32  
33  
34  
35  
36  
37  
38  
39  
40  
41  
42  
43  
44  
45  
46  
47  
48  
49  
50  
51  
52  
53  
54  
55  
56  
57  
58  
59  
60

596 Figure 1. Distribution of respondents by country and parental presence with newborn per country (A),  
597 presence of support persons during pregnancy-related appointments (B), and labour companionship  
598 (C)  
599 Figure 2. Country-specific proportions on A. the concern about the COVID-19 situation and B. mental  
600 health support

For peer review only



601 **REFERENCES**

- 602
- 603 1. United Nations Statistics Division. Goal 3: Ensure healthy lives and promote well-being for all  
604 at all ages. 2021. Available from: <https://unstats.un.org/sdgs/report/2017/goal-03/>
- 605 2. Coll-Seck A, Clark H, Bahl R, Peterson S, Costello A, Lucas T. Framing an agenda for children  
606 thriving in the SDG era: a WHO–UNICEF–Lancet Commission on Child Health and Wellbeing.  
607 *The Lancet*. 2019 Jan;393(10167):109–12.
- 608 3. Semaan A, Audet C, Huysmans E, Afolabi B, Assarag B, Banke-Thomas A, et al. Voices from the  
609 frontline: findings from a thematic analysis of a rapid online global survey of maternal and  
610 newborn health professionals facing the COVID-19 pandemic. *BMJ Glob Health*. 2020  
611 Jun;5(6):e002967.
- 612 4. Shapira G, Ahmed T, Drouard SHP, Amor Fernandez P, Kandpal E, Nzelu C, et al. Disruptions in  
613 maternal and child health service utilization during COVID-19: analysis from eight sub-Saharan  
614 African countries. *Health Policy and Planning*. 2021 Aug 12;36(7):1140–51.
- 615 5. Shapira G, de Walque D, Friedman J. How many infants may have died in low-income and  
616 middle-income countries in 2020 due to the economic contraction accompanying the COVID-19  
617 pandemic? Mortality projections based on forecasted declines in economic growth. *BMJ Open*.  
618 2021;11(9).
- 619 6. Liu L, Oza S, Hogan D, Chu Y, Perin J, Zhu J, et al. Global, regional, and national causes of  
620 under-5 mortality in 2000–15: an updated systematic analysis with implications for the  
621 Sustainable Development Goals. *The Lancet*. 2016 Dec;388(10063):3027–35.
- 622 7. Althabe F, Howson CP, Kinney M, Lawn J, World Health Organization. Born too soon: the global  
623 action report on preterm birth. 2012. Available from:  
624 <http://www.who.int/pmnch/media/news/2012/201204%5Fborntoosoon-report.pdf>
- 625 8. WHO. Causes of newborn mortality and morbidity in the European Region. Available from:  
626 [https://www.euro.who.int/en/health-topics/Life-stages/maternal-and-newborn-health/causes-of-](https://www.euro.who.int/en/health-topics/Life-stages/maternal-and-newborn-health/causes-of-newborn-mortality-and-morbidity-in-the-european-region)  
627 [newborn-mortality-and-morbidity-in-the-european-region](https://www.euro.who.int/en/health-topics/Life-stages/maternal-and-newborn-health/causes-of-newborn-mortality-and-morbidity-in-the-european-region)
- 628 9. Chawanpaiboon S, Vogel JP, Moller A-B, Lumbiganon P, Petzold M, Hogan D, et al. Global,  
629 regional, and national estimates of levels of preterm birth in 2014: a systematic review and  
630 modelling analysis. *The Lancet Global Health*. 2019 Jan;7(1):e37–46.
- 631 10. Lehtonen L, Gimeno A, Parra-Llorca A, Vento M. Early neonatal death: A challenge worldwide.  
632 *Semin Fetal Neonatal Med*. 2017;22(3):153–60.
- 633 11. EACH European Association for Children in Hospital. The EACH Charter with annotations.  
634 EACH; 2016. Available from: [www.each-for-sick-children.org](http://www.each-for-sick-children.org)
- 635 12. UN Commission on Human Rights. Convention on the Rights of the Child, E/CN.4/RES/1990/74.  
636 General Assembly; 1990.
- 637 13. McAdams RM. Family separation during COVID-19. *Pediatr Res*. 2021 Apr;89(5):1317–8.
- 638 14. Bembich S, Tripani A, Mastromarino S, Di Risio G, Castelpietra E, Risso FM. Parents  
639 experiencing NICU visit restrictions due to COVID-19 pandemic. *Acta Paediatr*. 2020 Oct  
640 28;apa.15620.
- 641 15. Muniraman H, Ali M, Cawley P, Hillyer J, Heathcote A, Ponnusamy V, et al. Parental perceptions  
642 of the impact of neonatal unit visitation policies during COVID-19 pandemic. *bmjpo*. 2020  
643 Nov;4(1):e000899.

- 1  
2  
3 644 16. Oude Maatman SM, Bohlin K, Lilliesköld S, Garberg HT, Uitewaal-Poslawky I, Kars MC, et al.  
4 645 Factors Influencing Implementation of Family-Centered Care in a Neonatal Intensive Care Unit.  
5 646 *Front Pediatr.* 2020 May 6;8:222.
- 7 647 17. Ding X, Zhu L, Zhang R, Wang L, Wang T-T, Latour JM. Effects of family-centred care  
8 648 interventions on preterm infants and parents in neonatal intensive care units: A systematic review  
9 649 and meta-analysis of randomised controlled trials. *Australian Critical Care.* 2019 Jan;32(1):63–75.
- 11 650 18. Kostenzer J, Hoffmann J, von Rosenstiel-Pulver C, Walsh A, Zimmermann L, Mader S, et al.  
12 651 Neonatal care during the COVID-19 pandemic – a global survey of parents’ experiences regarding  
13 652 infant and family-centred developmental care. 2021;
- 15 653 19. Stefani G, Skopec M, Battersby C, Harris M. Why is Kangaroo Mother Care not yet scaled in the  
16 654 UK? A systematic review and realist synthesis of a frugal innovation for newborn care. *BMJ*  
17 655 *Innov.* 2021 Oct 22;bmjinnov-2021-000828.
- 19 656 20. Yue J, Liu J, Williams S, Zhang B, Zhao Y, Zhang Q, et al. Barriers and facilitators of kangaroo  
20 657 mother care adoption in five Chinese hospitals: a qualitative study. *BMC Public Health.* 2020  
21 658 Dec;20(1):1234.
- 23 659 21. Rao SPN, Minckas N, Medvedev MM, Gathara D, Y N P, Seifu Estifanos A, et al. Small and sick  
24 660 newborn care during the COVID-19 pandemic: global survey and thematic analysis of healthcare  
25 661 providers’ voices and experiences. *BMJ Glob Health.* 2021 Mar;6(3):e004347.
- 27 662 22. Litmanovitz I, Silberstein D, Butler S, Vittner D. Care of hospitalized infants and their families  
28 663 during the COVID-19 pandemic: an international survey. *J Perinatol.* 2021 Mar 23 [cited 2021  
29 664 Mar 26]; Available from: <http://www.nature.com/articles/s41372-021-00960-8>
- 31 665 23. Harding C, Aloysius A, Bell N, Edney S, Gordon Z, Lewis H, et al. Reflections on COVID -19  
32 666 and the potential impact on preterm infant feeding and speech, language and communication  
33 667 development. *Journal of Neonatal Nursing.* 2021 Jun;27(3):220–2.
- 35 668 24. Green J, Staff L, Bromley P, Jones L, Petty J. The implications of face masks for babies and  
36 669 families during the COVID-19 pandemic: A discussion paper. *Journal of Neonatal Nursing.* 2021  
37 670 Feb;27(1):21–5.
- 39 671 25. European Foundation for the Care of Newborn Infants, Bergman NJ, Westrup B, et. al. European  
40 672 Standards of Care for Newborn Health: Project Report. EFCNI; 2018. Available from:  
41 673 [www.efcni.org/wp-content/uploads/2018/11/2018\\_11\\_16\\_ESCNH\\_Report\\_final.pdf](http://www.efcni.org/wp-content/uploads/2018/11/2018_11_16_ESCNH_Report_final.pdf)
- 43 674 26. Mushtaq A, Kazi F. Family-centred care in the NICU. *The Lancet Child & Adolescent Health.*  
44 675 2019 May;3(5):295–6.
- 46 676 27. Damhuis G, König K, Westrup B, Kuhn P, Daly M, Bertonecelli N, et al. European Standards of  
47 677 Care for Newborn Health: Infant- and family-centred developmental care. European Foundation  
48 678 for the Care of Newborn Infants (EFCNI); 2018. Available from: [https://newborn-health-standards.org/wp-content/uploads/2019/10/TEG\\_IFCDC\\_complete.pdf](https://newborn-health-standards.org/wp-content/uploads/2019/10/TEG_IFCDC_complete.pdf)
- 50 679 28. Scala M, Marchman VA, Brignoni-Pérez E, Morales MC, Travis KE. Impact of the COVID-19  
51 680 pandemic on developmental care practices for infants born preterm. *Pediatrics;* 2020 Nov [cited  
52 681 2021 Mar 26]. Available from: <http://medrxiv.org/lookup/doi/10.1101/2020.11.25.20238956>
- 54 682 29. Darcey-Mahoney A, White RD, Velasquez A, Barrett TS, Clark RH, Ahmad KA. Impact of  
55 683 Restrictions on Parental Presence in Neonatal Intensive Care Units Related to COVID-19.  
56 684 *Pediatrics;* 2020 Jul [cited 2020 Sep 23]. Available from:  
57 685 <http://medrxiv.org/lookup/doi/10.1101/2020.07.22.20158949>  
58 686

- 1  
2  
3 687 30. Salvatore CM, Han J-Y, Acker KP, Tiwari P, Jin J, Brandler M, et al. Neonatal management and  
4 688 outcomes during the COVID-19 pandemic: an observation cohort study. *The Lancet Child &*  
5 689 *Adolescent Health*. 2020 Oct;4(10):721–7.
- 6  
7 690 31. Minckas N, Medvedev MM, Adejuyigbe EA, Brotherton H, Chellani H, Estifanos AS, et al.  
8 691 Preterm care during the COVID-19 pandemic: A comparative risk analysis of neonatal deaths  
9 692 averted by kangaroo mother care versus mortality due to SARS-CoV-2 infection.  
10 693 *EClinicalMedicine*. 2021 Feb;100733.
- 11  
12 694 32. Brown A, Shenker N. Experiences of breastfeeding during COVID-19: Lessons for future  
13 695 practical and emotional support. *Matern Child Nutr*. 2021 Jan;17(1). Available from:  
14 696 <https://onlinelibrary.wiley.com/doi/10.1111/mcn.13088>
- 15  
16 697 33. van Veenendaal NR, Deierl A, Bacchini F, O'Brien K, Franck LS, The International Steering  
17 698 Committee for Family Integrated Care. Supporting parents as essential care partners in neonatal  
18 699 units during the SARS-CoV-2 pandemic. *Acta Paediatrica*. 2021 Mar 26;apa.15857.
- 20  
21 700 34. BLISS for babies born premature or sick. Locked out: the impact of COVID-19 on neonatal care.  
22 701 2021. Available from: [https://s3.eu-west-2.amazonaws.com/files.bliss.org.uk/images/Locked-out-](https://s3.eu-west-2.amazonaws.com/files.bliss.org.uk/images/Locked-out-the-impact-of-COVID-19-on-neonatal-care-final.pdf?mtime=20210519184749&focal=none)  
23 702 [the-impact-of-COVID-19-on-neonatal-care-final.pdf?mtime=20210519184749&focal=none](https://s3.eu-west-2.amazonaws.com/files.bliss.org.uk/images/Locked-out-the-impact-of-COVID-19-on-neonatal-care-final.pdf?mtime=20210519184749&focal=none)
- 24  
25 703 35. Eysenbach G. Improving the quality of Web surveys: the Checklist for Reporting Results of  
26 704 Internet E-Surveys (CHERRIES). *J Med Internet Res*. 2004 Sep 29;6(3):e34.
- 27  
28 705 36. World Health Organization. WHO COVID-19 Dashboard. Geneva; 2020. Available from:  
29 706 <https://covid19.who.int>
- 30  
31 707 37. World Health Organization. COVID-19 Weekly Epidemiological Update - 29 November 2020.  
32 708 WHO: Geneva, Switzerland; 2020 [cited 2021 Jun 28]. Available from:  
33 709 <https://www.who.int/publications/m/item/weekly-epidemiological-update---1-december-2020>
- 34  
35 710 38. Yan B, Zhang X, Wu L, Zhu H, Chen B. Why Do Countries Respond Differently to COVID-19?  
36 711 A Comparative Study of Sweden, China, France, and Japan. *The American Review of Public*  
37 712 *Administration*. 2020 Aug;50(6–7):762–9.
- 38  
39 713 39. Claeson M, Hanson S. COVID-19 and the Swedish enigma. *The Lancet*. 2021  
40 714 Jan;397(10271):259–61.
- 41  
42 715 40. Baral S, Chandler R, Prieto RG, Gupta S, Mishra S, Kulldorff M. Leveraging epidemiological  
43 716 principles to evaluate Sweden's COVID-19 response. *Annals of Epidemiology*. 2021 Feb;54:21–  
44 717 6.
- 45  
46 718 41. Amer F, Hammoud S, Farran B, Boncz I, Endrei D. Assessment of Countries' Preparedness and  
47 719 Lockdown Effectiveness in Fighting COVID-19. *Disaster med public health prep*. 2021  
48 720 Apr;15(2):e15–22.
- 49  
50 721 42. Garcia PJ, Alarcón A, Bayer A, Buss P, Guerra G, Ribeiro H, et al. COVID-19 Response in Latin  
51 722 America. *The American Journal of Tropical Medicine and Hygiene*. 2020 Nov 4;103(5):1765–72.
- 52  
53 723 43. Hale T, Angrist N, Goldszmidt R, Kira B, Petherick A, Phillips T, et al. A global panel database  
54 724 of pandemic policies (Oxford COVID-19 Government Response Tracker). *Nat Hum Behav*. 2021  
55 725 Apr;5(4):529–38.
- 56  
57 726 44. World Health Organization. Trends in maternal mortality 2000 to 2017: estimates by WHO,  
58 727 UNICEF, UNFPA, World Bank Group and the United Nations Population Division. Geneva:  
59 728 World Health Organization; 2019. Available from: <https://apps.who.int/iris/handle/10665/327595>

- 1  
2  
3 729 45. UN Inter-agency Group for Child Mortality Estimation. Most recent stillbirth, child and  
4 730 adolescent mortality estimates. 2019 [cited 2021 Nov 26]. Available from:  
5 731 <https://childmortality.org/>  
6  
7 732 46. Bohren MA, Berger BO, Munthe-Kaas H, Tunçalp Ö. Perceptions and experiences of labour  
8 733 companionship: a qualitative evidence synthesis. *Cochrane Effective Practice and Organisation of*  
9 734 *Care Group*, editor. *Cochrane Database of Systematic Reviews*. 2019 Mar 18; Available from:  
10 735 <http://doi.wiley.com/10.1002/14651858.CD012449.pub2>  
11  
12 736 47. Shakibazadeh E, Namadian M, Bohren M, Vogel J, Rashidian A, Nogueira Pileggi V, et al.  
13 737 Respectful care during childbirth in health facilities globally: a qualitative evidence synthesis.  
14 738 *BJOG: Int J Obstet Gy*. 2018 Jul;125(8):932–42.  
15  
16 739 48. WHO. WHO recommendations Intrapartum care for a positive childbirth experience -  
17 740 Transforming care of women and babies for improved health and well-being. WHO: Geneva,  
18 741 Switzerland; 2018.  
19  
20 742 49. World Health Organization. Coronavirus disease (COVID-19): Pregnancy and childbirth. 2020  
21 743 [cited 2021 Aug 2]. Available from: [www.who.int/news-room/q-a-detail/coronavirus-disease-](http://www.who.int/news-room/q-a-detail/coronavirus-disease-covid-19-pregnancy-and-childbirth)  
22 744 [covid-19-pregnancy-and-childbirth](http://www.who.int/news-room/q-a-detail/coronavirus-disease-covid-19-pregnancy-and-childbirth)  
23  
24 745 50. Cena L, Biban P, Janos J, Lavelli M, Langfus J, Tsai A, et al. The Collateral Impact of COVID-19  
25 746 Emergency on Neonatal Intensive Care Units and Family-Centered Care: Challenges and  
26 747 Opportunities. *Front Psychol*. 2021 Feb 24;12:630594.  
27  
28 748 51. Boronat N, Escarti A, Vento M. We want our families in the NICU! *Pediatr Res*. 2020  
29 749 Sep;88(3):354–5.  
30  
31 750 52. Gooding JS, Cooper LG, Blaine AI, Franck LS, Howse JL, Berns SD. Family support and family-  
32 751 centered care in the neonatal intensive care unit: origins, advances, impact. *Semin Perinatol*. 2011  
33 752 Feb;35(1):20–8.  
34  
35 753 53. Bergman NJ. Birth practices: Maternal-neonate separation as a source of toxic stress. *Birth*  
36 754 *Defects Research*. 2019 Sep;111(15):1087–109.  
37  
38 755 54. Saenz P, Cerda M, Diaz JL, Yi P, Gorba M, Boronat N, et al. Psychological stress of parents of  
39 756 preterm infants enrolled in an early discharge programme from the neonatal intensive care unit: a  
40 757 prospective randomised trial. *Archives of Disease in Childhood - Fetal and Neonatal Edition*.  
41 758 2009 Mar 1;94(2):F98–104.  
42  
43 759 55. Ortenstrand A, Westrup B, Brostrom EB, Sarman I, Akerstrom S, Brune T, et al. The Stockholm  
44 760 Neonatal Family Centered Care Study: Effects on Length of Stay and Infant Morbidity.  
45 761 *PEDIATRICS*. 2010 Feb 1;125(2):e278–85.  
46  
47 762 56. Lv B, Gao X, Sun J, Li T, Liu Z, Zhu L, et al. Family-Centered Care Improves Clinical Outcomes  
48 763 of Very-Low-Birth-Weight Infants: A Quasi-Experimental Study. *Front Pediatr*. 2019 Apr  
49 764 12;7:138.  
50  
51 765 57. Ding X, Zhu L, Zhang R, Wang L, Wang T-T, Latour JM. Effects of family-centred care  
52 766 interventions on preterm infants and parents in neonatal intensive care units: A systematic review  
53 767 and meta-analysis of randomised controlled trials. *Australian Critical Care*. 2019 Jan;32(1):63–75.  
54  
55 768 58. Bhutta ZA, Das JK, Bahl R, Lawn JE, Salam RA, Paul VK, et al. Can available interventions end  
56 769 preventable deaths in mothers, newborn babies, and stillbirths, and at what cost? *The Lancet*. 2014  
57 770 Jul;384(9940):347–70.  
58  
59  
60



- 1  
2  
3 771 59. Mazumder S, Taneja S, Dube B, Bhatia K, Ghosh R, Shekhar M, et al. Effect of community-  
4 772 initiated kangaroo mother care on survival of infants with low birthweight: a randomised  
5 773 controlled trial. *The Lancet*. 2019 Nov;394(10210):1724–36.  
6  
7 774 60. WHO Immediate KMC Study Group. Immediate “Kangaroo Mother Care” and Survival of Infants  
8 775 with Low Birth Weight. *N Engl J Med*. 2021 May 27;384(21):2028–38.  
9  
10 776 61. Al-Motlaq MA, Carter B, Neill S, Hallstrom IK, Foster M, Coyne I, et al. Toward developing  
11 777 consensus on family-centred care: An international descriptive study and discussion. *J Child*  
12 778 *Health Care*. 2019 Sep;23(3):458–67.  
13  
14 779 62. WHO. Breastfeeding and COVID-19. 2020 [cited 2021 Jun 9]. Available from:  
15 780 [https://www.who.int/publications/i/item/WHO-2019-nCoV-Sci\\_Brief-Breastfeeding-2020.1](https://www.who.int/publications/i/item/WHO-2019-nCoV-Sci_Brief-Breastfeeding-2020.1)  
16  
17 781 63. Spatz DL, Davanzo R, Müller JA, Powell R, Rigourd V, Yates A, et al. Promoting and Protecting  
18 782 Human Milk and Breastfeeding in a COVID-19 World. *Front Pediatr*. 2021 Feb 3;8:633700.  
19  
20 783 64. Rollins N, Minckas N, Jehan F, Lodha R, Raiten D, Thorne C, et al. A public health approach for  
21 784 deciding policy on infant feeding and mother–infant contact in the context of COVID-19. *The*  
22 785 *Lancet Global Health*. 2021 Apr;9(4):e552–7.  
23  
24 786 65. Misund AR, Nerdrum P, Diseth TH. Mental health in women experiencing preterm birth. *BMC*  
25 787 *Pregnancy Childbirth*. 2014 Dec;14(1):263.  
26  
27 788 66. Simon S, Moreyra A, Wharton E, Dowtin LL, Borkovi TC, Armer E, et al. Prevention of  
28 789 posttraumatic stress disorder in mothers of preterm infants using trauma-focused group therapy:  
29 790 Manual development and evaluation. *Early Human Development*. 2021 Mar;154:105282.  
30  
31 791 67. Pfefferbaum B, North CS. Mental Health and the Covid-19 Pandemic. *N Engl J Med*. 2020 Aug  
32 792 6;383(6):510–2.  
33  
34 793 68. Chmielewska B, Barratt I, Townsend R, Kalafat E, van der Meulen J, Gurol-Urganci I, et al.  
35 794 Effects of the COVID-19 pandemic on maternal and perinatal outcomes: a systematic review and  
36 795 meta-analysis. *The Lancet Global Health*. 2021 Mar;S2214109X21000796.  
37  
38 796 69. Blumenberg C, Barros AJD. Response rate differences between web and alternative data  
39 797 collection methods for public health research: a systematic review of the literature. *Int J Public*  
40 798 *Health*. 2018 Jul;63(6):765–73.  
41  
42 799 70. Murgante B, Borruso G, Balletto G, Castiglia P, Dettori M. Why Italy First? Health, Geographical  
43 800 and Planning Aspects of the COVID-19 Outbreak. *Sustainability*. 2020 Jun 22;12(12):5064.  
44  
45 801 71. EFCNI, Kostenzer J, von Rosenstiel-Pulver C, Hoffmann J, Walsh A, Fügenschuh S, et al. Zero  
46 802 separation. Together for better care! Infant and family-centred developmental care in times of  
47 803 COVID-19 – A global survey of parents’ experiences Project Report. EFCNI; 2021.  
48  
49 804 72. Kostenzer J, Zimmermann LJI, Mader S, Abenstein A, Daly M, Fügenschuh S, et al. Zero  
50 805 separation: infant and family-centred developmental care in times of COVID-19. *The Lancet*  
51 806 *Child & Adolescent Health*. 2021 Nov;S2352464221003400.  
52  
53  
54  
55 807  
56  
57  
58  
59  
60

1  
2  
3  
4  
5  
6  
7  
8  
9  
10  
11  
12  
13  
14  
15  
16  
17  
18  
19  
20  
21  
22  
23  
24  
25  
26  
27  
28  
29  
30  
31  
32  
33  
34  
35  
36  
37  
38  
39  
40  
41  
42  
43  
44  
45  
46  
47  
48  
49  
50  
51  
52  
53  
54  
55  
56  
57  
58  
59  
60

808 **SUPPLEMENTARY MATERIAL**

- 809  
810 Supplementary Table S1  
811 Title: Baseline and COVID-19 related characteristics of participants  
812  
813 Supplementary Table S2  
814 Title: Country demographics and COVID-19 related characteristics  
815  
816 Supplementary Table S3  
817 Title: Prenatal care and birth  
818  
819 Supplementary Table S4  
820 Title: Presence with the newborn  
821  
822 Supplementary Table S5  
823 Title: 95% confidence interval of questions related to presence with the newborn and skin-to-skin care  
824  
825 Supplementary Table S6  
826 Title: Information on breastfeeding/nutrition  
827  
828 Supplementary Table S7  
829 Title: Information on health communication  
830  
831 Supplementary Table S8  
832 Title: Information on mental health status  
833  
834 Supplementary Material S9  
835 Title: Survey

A. Participants per country (n=1148)

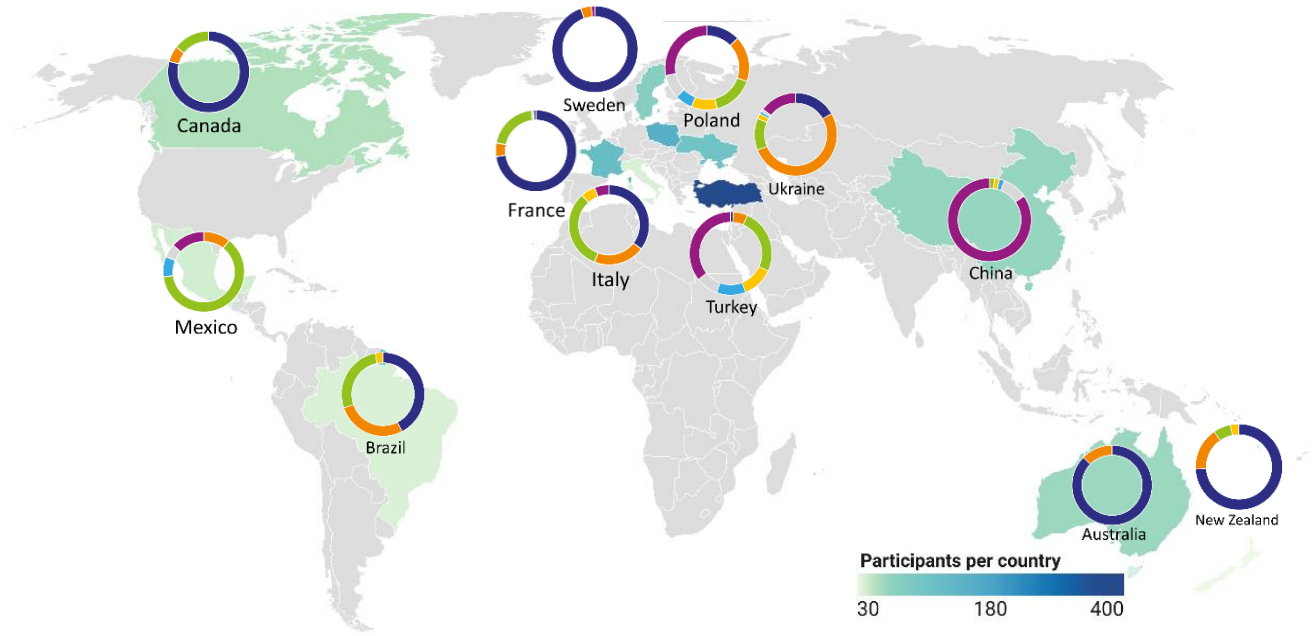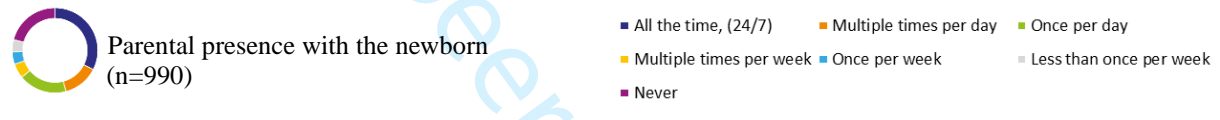

B. Presence of another person during pregnancy-related appointments (n=1044)

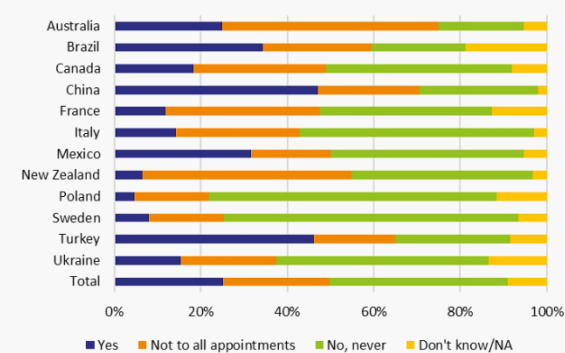

C. Presence of another person during birth (n=1045)

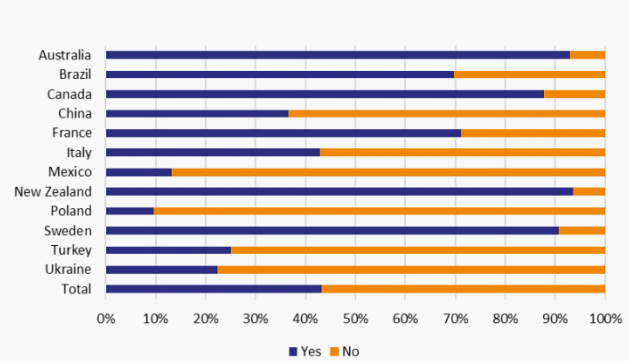

Figure 1. Distribution of respondents by country and parental presence with newborn per country (A), presence of support persons during pregnancy-related appointments (B), and labour companionship (C)



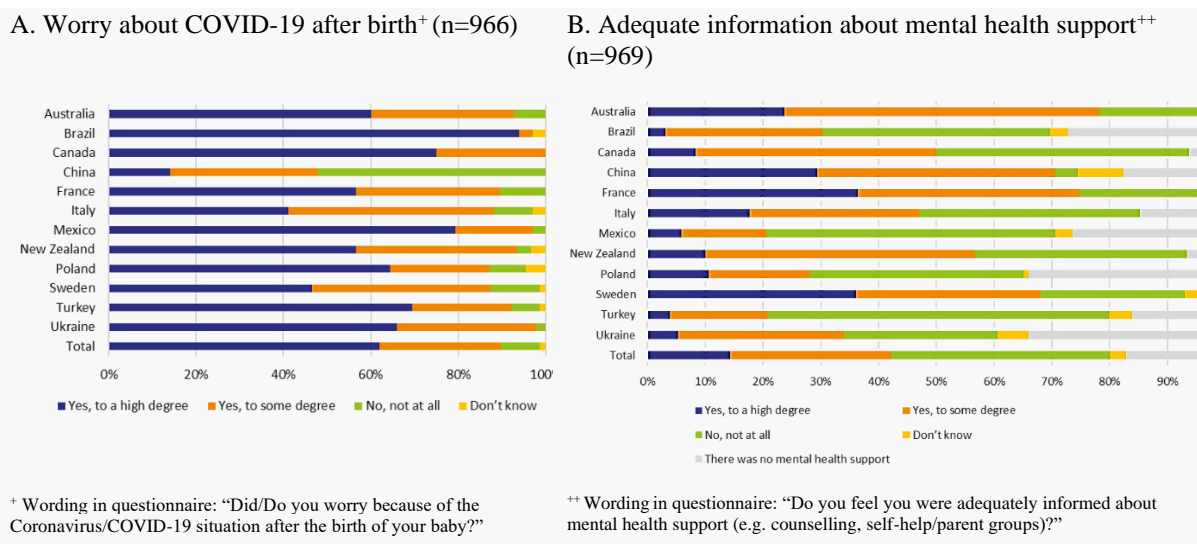

Figure 2. Country-specific proportions on A. the concern about the COVID-19 situation and B. mental health support

1  
2  
3 **SUPPLEMENTARY MATERIAL**  
4

5 **Supplementary Table S1**

6 Title: Baseline and COVID-19 related characteristics of participants  
7

8 **Supplementary Table S2**

9 Title: Country demographics and COVID-19 related characteristics  
10

11 **Supplementary Table S3**

12 Title: Prenatal care and birth  
13

14 **Supplementary Table S4**

15 Title: Presence with the newborn  
16

17 **Supplementary Table S5**

18 Title: 95% confidence interval of questions related to presence with the newborn and skin-to-skin care  
19  
20

21 **Supplementary Table S6**

22 Title: Information on breastfeeding/nutrition  
23

24 **Supplementary Table S7**

25 Title: Information on health communication  
26

27 **Supplementary Table S8**

28 Title: Information on mental health status  
29

30 **Supplementary Material S9**

31 Title: Survey  
32  
33  
34  
35  
36  
37  
38  
39  
40  
41  
42  
43  
44  
45  
46  
47  
48  
49  
50  
51  
52  
53  
54  
55  
56  
57  
58  
59  
60

Supplementary Table S1. Baseline and COVID-19 related characteristics of participants

|                                                   | Total           | Australia     | Brazil        | Canada        | China         | France         | Italy         | Mexico        | New Zealand   | Poland         | Sweden        | Turkey         | Ukraine        |
|---------------------------------------------------|-----------------|---------------|---------------|---------------|---------------|----------------|---------------|---------------|---------------|----------------|---------------|----------------|----------------|
| <b>Age of respondent (years)</b>                  |                 |               |               |               |               |                |               |               |               |                |               |                |                |
|                                                   | <b>n = 1146</b> | <b>n = 58</b> | <b>n = 38</b> | <b>n = 52</b> | <b>n = 60</b> | <b>n = 125</b> | <b>n = 38</b> | <b>n = 40</b> | <b>n = 31</b> | <b>n = 160</b> | <b>n = 78</b> | <b>n = 357</b> | <b>n = 109</b> |
| <20                                               | 5 (0%)          | 1 (2%)        | 0 (0%)        | 0 (0%)        | 1 (2%)        | 1 (1%)         | 0 (0%)        | 1 (3%)        | 0 (0%)        | 0 (0%)         | 0 (0%)        | 1 (0%)         | 0 (0%)         |
| 20-29                                             | 468 (41%)       | 14 (24%)      | 15 (39%)      | 15 (29%)      | 16 (27%)      | 40 (32%)       | 2 (5%)        | 18 (45%)      | 15 (48%)      | 70 (44%)       | 24 (31%)      | 205 (57%)      | 34 (31%)       |
| 30-39                                             | 608 (53%)       | 39 (67%)      | 20 (53%)      | 30 (58%)      | 38 (63%)      | 78 (62%)       | 30 (79%)      | 18 (45%)      | 15 (48%)      | 84 (53%)       | 46 (59%)      | 136 (38%)      | 74 (68%)       |
| >40                                               | 65 (6%)         | 4 (7%)        | 3 (8%)        | 7 (13%)       | 5 (8%)        | 6 (5%)         | 6 (16%)       | 3 (8%)        | 1 (3%)        | 6 (4%)         | 8 (10%)       | 15 (4%)        | 1 (1%)         |
| <b>Gestational age at birth (weeks)</b>           |                 |               |               |               |               |                |               |               |               |                |               |                |                |
|                                                   | <b>n = 1107</b> | <b>n = 58</b> | <b>n = 37</b> | <b>n = 49</b> | <b>n = 53</b> | <b>n = 123</b> | <b>n = 36</b> | <b>n = 41</b> | <b>n = 31</b> | <b>n = 154</b> | <b>n = 75</b> | <b>n = 344</b> | <b>n = 106</b> |
| Early preterm: <28                                | 270 (24%)       | 22 (38%)      | 9 (24%)       | 15 (31%)      | 18 (34%)      | 40 (33%)       | 9 (25%)       | 4 (10%)       | 6 (19%)       | 40 (26%)       | 23 (31%)      | 67 (19%)       | 17 (16%)       |
| Very preterm: 28-<br><32                          | 389 (35%)       | 10 (17%)      | 16 (43%)      | 14 (29%)      | 29 (55%)      | 36 (29%)       | 10 (28%)      | 20 (49%)      | 7 (23%)       | 48 (31%)       | 27 (36%)      | 140 (41%)      | 32 (30%)       |
| Moderate to late<br>preterm: 32-<br><37           | 412 (37%)       | 20 (34%)      | 12 (32%)      | 20 (41%)      | 6 (11%)       | 43 (35%)       | 15 (42%)      | 15 (37%)      | 15 (48%)      | 64 (42%)       | 19 (25%)      | 131 (38%)      | 52 (49%)       |
| Term: 37-42                                       | 36 (3%)         | 6 (10%)       | 0 (0%)        | 0 (0%)        | 0 (0%)        | 4 (3%)         | 2 (6%)        | 2 (5%)        | 3 (10%)       | 2 (1%)         | 6 (8%)        | 6 (2%)         | 5 (5%)         |
| <b>Multiple pregnancy</b>                         |                 |               |               |               |               |                |               |               |               |                |               |                |                |
|                                                   | <b>n = 1112</b> | <b>n = 58</b> | <b>n = 37</b> | <b>n = 49</b> | <b>n = 54</b> | <b>n = 124</b> | <b>n = 36</b> | <b>n = 41</b> | <b>n = 31</b> | <b>n = 154</b> | <b>n = 75</b> | <b>n = 344</b> | <b>n = 109</b> |
| Yes                                               | 180 (16%)       | 12 (21%)      | 7 (19%)       | 6 (12%)       | 18 (33%)      | 14 (11%)       | 5 (14%)       | 4 (10%)       | 3 (10%)       | 14 (9%)        | 16 (21%)      | 65 (19%)       | 16 (15%)       |
| No                                                | 932 (84%)       | 46 (79%)      | 30 (81%)      | 43 (88%)      | 36 (67%)      | 110 (89%)      | 31 (86%)      | 37 (90%)      | 28 (90%)      | 140 (91%)      | 59 (79%)      | 279 (81%)      | 93 (85%)       |
| <b>Birth mode</b>                                 |                 |               |               |               |               |                |               |               |               |                |               |                |                |
|                                                   | <b>n = 1111</b> | <b>n = 58</b> | <b>n = 37</b> | <b>n = 50</b> | <b>n = 54</b> | <b>n = 124</b> | <b>n = 36</b> | <b>n = 41</b> | <b>n = 30</b> | <b>n = 153</b> | <b>n = 75</b> | <b>n = 344</b> | <b>n = 109</b> |
| Vaginal birth                                     | 301 (27%)       | 18 (31%)      | 6 (16%)       | 22 (44%)      | 24 (44%)      | 62 (50%)       | 14 (39%)      | 6 (15%)       | 6 (20%)       | 42 (27%)       | 28 (37%)      | 38 (11%)       | 35 (32%)       |
| C-section                                         | 804 (72%)       | 39 (67%)      | 31 (84%)      | 28 (56%)      | 29 (54%)      | 62 (50%)       | 21 (58%)      | 35 (85%)      | 24 (80%)      | 111 (73%)      | 47 (63%)      | 304 (88%)      | 73 (67%)       |
| Both (e.g. in case of<br>multiple pregnancy)      | 6 (1%)          | 1 (2%)        | 0 (0%)        | 0 (0%)        | 1 (2%)        | 0 (0%)         | 1 (3%)        | 0 (0%)        | 0 (0%)        | 0 (0%)         | 0 (0%)        | 2 (1%)         | 1 (1%)         |
| <b>Birth weight of the baby (grams)</b>           |                 |               |               |               |               |                |               |               |               |                |               |                |                |
|                                                   | <b>n = 1110</b> | <b>n = 58</b> | <b>n = 37</b> | <b>n = 50</b> | <b>n = 54</b> | <b>n = 124</b> | <b>n = 36</b> | <b>n = 41</b> | <b>n = 31</b> | <b>n = 154</b> | <b>n = 75</b> | <b>n = 342</b> | <b>n = 108</b> |
| <1000                                             | 290 (26%)       | 20 (34%)      | 10 (27%)      | 18 (36%)      | 15 (28%)      | 45 (36%)       | 14 (39%)      | 6 (15%)       | 8 (26%)       | 35 (23%)       | 27 (36%)      | 78 (23%)       | 14 (13%)       |
| 1000-1500                                         | 373 (34%)       | 14 (24%)      | 15 (41%)      | 11 (22%)      | 28 (52%)      | 28 (23%)       | 5 (14%)       | 18 (44%)      | 7 (23%)       | 57 (37%)       | 18 (24%)      | 130 (38%)      | 42 (39%)       |
| >1500-2500                                        | 374 (34%)       | 16 (28%)      | 12 (32%)      | 15 (30%)      | 10 (19%)      | 45 (36%)       | 16 (44%)      | 13 (32%)      | 10 (32%)      | 53 (34%)       | 19 (25%)      | 120 (35%)      | 45 (42%)       |
| >2500                                             | 71 (6%)         | 8 (14%)       | 0 (0%)        | 6 (12%)       | 1 (2%)        | 6 (5%)         | 1 (3%)        | 4 (10%)       | 6 (19%)       | 9 (6%)         | 10 (13%)      | 14 (4%)        | 6 (6%)         |
| Don't know the<br>birth weight                    | 2 (0%)          | 0 (0%)        | 0 (0%)        | 0 (0%)        | 0 (0%)        | 0 (0%)         | 0 (0%)        | 0 (0%)        | 0 (0%)        | 0 (0%)         | 1 (1%)        | 0 (0%)         | 1 (1%)         |
| <b>Duration of special/intensive care (weeks)</b> |                 |               |               |               |               |                |               |               |               |                |               |                |                |
|                                                   | <b>n = 1112</b> | <b>n = 58</b> | <b>n = 37</b> | <b>n = 50</b> | <b>n = 54</b> | <b>n = 124</b> | <b>n = 36</b> | <b>n = 41</b> | <b>n = 31</b> | <b>n = 154</b> | <b>n = 75</b> | <b>n = 344</b> | <b>n = 108</b> |
| <1                                                | 81 (7%)         | 3 (5%)        | 0 (0%)        | 5 (10%)       | 5 (9%)        | 4 (3%)         | 4 (11%)       | 3 (7%)        | 1 (3%)        | 10 (6%)        | 4 (5%)        | 13 (4%)        | 29 (27%)       |
| 1-3                                               | 251 (23%)       | 10 (17%)      | 5 (14%)       | 11 (22%)      | 17 (31%)      | 24 (19%)       | 11 (31%)      | 7 (17%)       | 3 (10%)       | 29 (19%)       | 20 (27%)      | 73 (21%)       | 41 (38%)       |
| >3-5                                              | 277 (25%)       | 12 (21%)      | 10 (27%)      | 2 (4%)        | 17 (31%)      | 61 (49%)       | 3 (8%)        | 10 (24%)      | 9 (29%)       | 43 (28%)       | 13 (17%)      | 83 (24%)       | 14 (13%)       |
| >5                                                | 503 (45%)       | 33 (57%)      | 22 (59%)      | 32 (64%)      | 15 (28%)      | 35 (28%)       | 18 (50%)      | 21 (51%)      | 18 (58%)      | 72 (47%)       | 38 (51%)      | 175 (51%)      | 24 (22%)       |

Supplementary Table S1. Baseline and COVID-19 related characteristics of participants (continued)

|                                                                                                                                                                                                                                    | Total           | Australia     | Brazil        | Canada        | China         | France         | Italy         | Mexico        | New Zealand   | Poland         | Sweden        | Turkey         | Ukraine        |
|------------------------------------------------------------------------------------------------------------------------------------------------------------------------------------------------------------------------------------|-----------------|---------------|---------------|---------------|---------------|----------------|---------------|---------------|---------------|----------------|---------------|----------------|----------------|
| <b>Different countries and regions have been addressing the threat of Coronavirus/COVID-19 in different ways. Which of the following best describes the situation in your country/region around the time of your baby's birth?</b> |                 |               |               |               |               |                |               |               |               |                |               |                |                |
|                                                                                                                                                                                                                                    | <b>n = 1071</b> | <b>n = 58</b> | <b>n = 33</b> | <b>n = 49</b> | <b>n = 52</b> | <b>n = 118</b> | <b>n = 35</b> | <b>n = 41</b> | <b>n = 30</b> | <b>n = 151</b> | <b>n = 75</b> | <b>n = 322</b> | <b>n = 107</b> |
| No major concern                                                                                                                                                                                                                   | 49 (5%)         | 0 (0%)        | 3 (9%)        | 4 (8%)        | 14 (27%)      | 6 (5%)         | 1 (3%)        | 2 (5%)        | 0 (0%)        | 1 (1%)         | 1 (1%)        | 14 (4%)        | 3 (3%)         |
| Precautions                                                                                                                                                                                                                        | 137 (13%)       | 6 (10%)       | 2 (6%)        | 4 (8%)        | 30 (58%)      | 12 (10%)       | 2 (6%)        | 5 (12%)       | 5 (17%)       | 12 (8%)        | 5 (7%)        | 44 (14%)       | 10 (9%)        |
| Social distancing                                                                                                                                                                                                                  | 325 (30%)       | 17 (29%)      | 8 (24%)       | 14 (29%)      | 7 (13%)       | 38 (32%)       | 9 (26%)       | 7 (17%)       | 6 (20%)       | 48 (32%)       | 69 (92%)      | 80 (25%)       | 22 (21%)       |
| Lockdown                                                                                                                                                                                                                           | 438 (41%)       | 31 (53%)      | 16 (48%)      | 26 (53%)      | 1 (2%)        | 16 (14%)       | 16 (46%)      | 27 (66%)      | 18 (60%)      | 73 (48%)       | 0 (0%)        | 147 (46%)      | 67 (63%)       |
| Quarantine                                                                                                                                                                                                                         | 122 (11%)       | 4 (7%)        | 4 (12%)       | 1 (2%)        | 0 (0%)        | 46 (39%)       | 7 (20%)       | 0 (0%)        | 1 (3%)        | 17 (11%)       | 0 (0%)        | 37 (11%)       | 5 (5%)         |
| <b>Have you tested positive for Coronavirus/COVID-19?</b>                                                                                                                                                                          |                 |               |               |               |               |                |               |               |               |                |               |                |                |
|                                                                                                                                                                                                                                    | <b>n = 1084</b> | <b>n = 58</b> | <b>n = 35</b> | <b>n = 50</b> | <b>n = 53</b> | <b>n = 121</b> | <b>n = 35</b> | <b>n = 41</b> | <b>n = 31</b> | <b>n = 150</b> | <b>n = 75</b> | <b>n = 326</b> | <b>n = 109</b> |
| Yes                                                                                                                                                                                                                                | 27 (2%)         | 1 (2%)        | 1 (3%)        | 0 (0%)        | 0 (0%)        | 1 (1%)         | 1 (3%)        | 5 (12%)       | 0 (0%)        | 1 (1%)         | 4 (5%)        | 8 (2%)         | 5 (5%)         |
| No                                                                                                                                                                                                                                 | 1057 (98%)      | 57 (98%)      | 34 (97%)      | 50 (100%)     | 53 (100%)     | 120 (99%)      | 34 (97%)      | 36 (88%)      | 31 (100%)     | 149 (99%)      | 71 (95%)      | 318 (98%)      | 104 (95%)      |
| <b>Has your partner tested positive for Coronavirus/COVID-19?</b>                                                                                                                                                                  |                 |               |               |               |               |                |               |               |               |                |               |                |                |
|                                                                                                                                                                                                                                    | <b>n = 1086</b> | <b>n = 57</b> | <b>n = 35</b> | <b>n = 50</b> | <b>n = 53</b> | <b>n = 121</b> | <b>n = 36</b> | <b>n = 41</b> | <b>n = 31</b> | <b>n = 152</b> | <b>n = 75</b> | <b>n = 326</b> | <b>n = 109</b> |
| Yes                                                                                                                                                                                                                                | 25 (2%)         | 1 (2%)        | 2 (6%)        | 0 (0%)        | 0 (0%)        | 1 (1%)         | 1 (3%)        | 5 (12%)       | 0 (0%)        | 0 (0%)         | 1 (1%)        | 8 (2%)         | 6 (6%)         |
| No                                                                                                                                                                                                                                 | 1039 (96%)      | 56 (98%)      | 27 (77%)      | 50 (100%)     | 53 (100%)     | 117 (97%)      | 35 (97%)      | 36 (88%)      | 31 (100%)     | 147 (97%)      | 74 (99%)      | 312 (96%)      | 101 (93%)      |
| Don't know                                                                                                                                                                                                                         | 22 (2%)         | 0 (0%)        | 6 (17%)       | 0 (0%)        | 0 (0%)        | 3 (2%)         | 0 (0%)        | 0 (0%)        | 0 (0%)        | 5 (3%)         | 0 (0%)        | 6 (2%)         | 2 (2%)         |
| <b>Has your baby tested positive for Coronavirus/COVID-19?</b>                                                                                                                                                                     |                 |               |               |               |               |                |               |               |               |                |               |                |                |
|                                                                                                                                                                                                                                    | <b>n = 1087</b> | <b>n = 58</b> | <b>n = 35</b> | <b>n = 50</b> | <b>n = 53</b> | <b>n = 121</b> | <b>n = 36</b> | <b>n = 41</b> | <b>n = 31</b> | <b>n = 152</b> | <b>n = 75</b> | <b>n = 326</b> | <b>n = 109</b> |
| Yes                                                                                                                                                                                                                                | 5 (0%)          | 1 (2%)        | 0 (0%)        | 0 (0%)        | 0 (0%)        | 0 (0%)         | 1 (3%)        | 1 (2%)        | 0 (0%)        | 0 (0%)         | 0 (0%)        | 1 (0%)         | 1 (1%)         |
| No                                                                                                                                                                                                                                 | 1035 (95%)      | 57 (98%)      | 31 (89%)      | 50 (100%)     | 50 (94%)      | 113 (93%)      | 35 (97%)      | 39 (95%)      | 31 (100%)     | 145 (95%)      | 74 (99%)      | 303 (93%)      | 107 (98%)      |
| Don't know                                                                                                                                                                                                                         | 47 (4%)         | 0 (0%)        | 4 (11%)       | 0 (0%)        | 3 (6%)        | 8 (7%)         | 0 (0%)        | 1 (2%)        | 0 (0%)        | 7 (5%)         | 1 (1%)        | 22 (7%)        | 1 (1%)         |

Supplementary Table S2. Country demographics and COVID-19 related characteristics

| Country     | GDP per capita [1] | Preterm birth rate (%) [2] | Female educational attainment at least completed upper secondary (%) (cumulative) [3] | Maternal mortality per 100,000 live births [4] | Under-5 mortality rate per 1,000 live births [5] | % of population using safely managed sanitation services [6] | Cumulative COVID-19 cases per 1 million population as of 29 November 2020 [7] | Average government response stringency index between 1 August and 29 November 2020 [8] |
|-------------|--------------------|----------------------------|---------------------------------------------------------------------------------------|------------------------------------------------|--------------------------------------------------|--------------------------------------------------------------|-------------------------------------------------------------------------------|----------------------------------------------------------------------------------------|
| Australia   | 51,812.2           | 8.6                        | 79.1 (2020)                                                                           | 6                                              | 4                                                | 74                                                           | 1,094                                                                         | 66.21                                                                                  |
| Brazil      | 6,796.8            | 11.18                      | 49.5 (2018)                                                                           | 60                                             | 14                                               | 49                                                           | 29,349                                                                        | 65.28                                                                                  |
| Canada      | 43,258.2           | 8.15                       | 84.9 (2016)                                                                           | 10                                             | 5                                                | 84                                                           | 9,514                                                                         | 68.98                                                                                  |
| China       | 10,500.4           | 6.94                       | 19.2 (2010)                                                                           | 29                                             | 8                                                | 70                                                           | 63                                                                            | 80.09                                                                                  |
| France      | 39,030.4           | 8.42                       | 70.0 (2019)                                                                           | 8                                              | 5                                                | 79                                                           | 33,242                                                                        | 60.65                                                                                  |
| Italy       | 31,676.2           | 7.79                       | 51.8 (2020)                                                                           | 2                                              | 3                                                | 96                                                           | 25,876                                                                        | 73.61                                                                                  |
| Mexico      | 8,346.7            | 7.04                       | 37.7 (2020)                                                                           | 33                                             | 14                                               | 57                                                           | 8,459                                                                         | 71.30                                                                                  |
| New Zealand | 41,477.9           | 7.47                       | 74.6 (2020)                                                                           | 9                                              | 5                                                | 82                                                           | 352                                                                           | 22.22                                                                                  |
| Poland      | 15,656.2           | 7.25                       | 85.9 (2020)                                                                           | 2                                              | 4                                                | 91                                                           | 25,725                                                                        | 57.41                                                                                  |
| Sweden      | 52,259.3           | 6.31                       | 77.2 (2019)                                                                           | 4                                              | 3                                                | 95                                                           | 24,074                                                                        | 62.04                                                                                  |
| Turkey      | 8,538.2            | 12.41                      | 36.0 (2019)                                                                           | 17                                             | 10                                               | 78                                                           | 5,785                                                                         | 54.40                                                                                  |
| Ukraine     | 3,726.9            | 8.72                       | 71.1 (2001)                                                                           | 19                                             | 8                                                | 72                                                           | 16,525                                                                        | 55.09                                                                                  |

**Note:** Average government response stringency index is a score from 0 (no restrictions) to 100 (maximal restrictions) related to the severity of restrictions in the country [8]

#### References in the table:

1. The World Bank. GDP per capita (current US\$). 2020 [cited 2021 Dec 1]. Available from: [https://data.worldbank.org/indicator/NY.GDP.PCAP.CD?name\\_desc=false](https://data.worldbank.org/indicator/NY.GDP.PCAP.CD?name_desc=false)
2. Chawanpaiboon S, Vogel JP, Moller A-B, Lumbiganon P, Petzold M, Hogan D, et al. Global, regional, and national estimates of levels of preterm birth in 2014: a systematic review and modelling analysis. *The Lancet Global Health*. 2019 Jan;7(1):e37–46.
3. UNESCO Institute for Statistics & The World Bank. Educational attainment, at least completed upper secondary, population 25+, total (%) (cumulative)E. 2021 [cited 2021 Dec 1]. Available from: <https://data.worldbank.org/indicator/SE.SEC.CUAT.UP.ZS>
4. World Health Organization. Trends in maternal mortality 2000 to 2017: estimates by WHO, UNICEF, UNFPA, World Bank Group and the United Nations Population Division. Geneva: World Health Organization; 2019 [cited 2021 Nov 26]. 104 p. Available from: <https://apps.who.int/iris/handle/10665/327595>
5. United Nations Inter-agency Group for Child Mortality Estimation. Subnational Under-five Mortality Estimates, 1990–2019: Estimates developed by the United Nations Inter-agency Group for Child Mortality Estimation. United Nations Children’s Fund, New York; 2021.
6. WHO/UNICEF Joint Monitoring Programme. Population using safely managed sanitation services (%). 2021 [cited 2021 Dec 1]. Available from: [https://www.who.int/data/gho/data/indicators/indicator-details/GHO/population-using-safely-managed-sanitation-services\(-\)](https://www.who.int/data/gho/data/indicators/indicator-details/GHO/population-using-safely-managed-sanitation-services(-))
7. World Health Organization. COVID-19 Weekly Epidemiological Update - 29 November 2020. WHO: Geneva, Switzerland; 2020 [cited 2021 Jun 28]. Available from: <https://www.who.int/publications/m/item/weekly-epidemiological-update---1-december-2020>
8. Hale T, Angrist N, Goldszmidt R, Kira B, Petherick A, Phillips T, et al. A global panel database of pandemic policies (Oxford COVID-19 Government Response Tracker). *Nat Hum Behav*. 2021 Apr;5(4):529–38.

Supplementary Table S3. Prenatal care and birth

|                                                                                                                                             | Total           | Australia     | Brazil        | Canada        | China         | France         | Italy         | Mexico        | New Zealand   | Poland         | Sweden        | Turkey         | Ukraine        |
|---------------------------------------------------------------------------------------------------------------------------------------------|-----------------|---------------|---------------|---------------|---------------|----------------|---------------|---------------|---------------|----------------|---------------|----------------|----------------|
| <b>How was the timing of pregnancy-related appointments affected, if at all, by Coronavirus/Covid-19?</b>                                   |                 |               |               |               |               |                |               |               |               |                |               |                |                |
|                                                                                                                                             | <b>n = 1045</b> | <b>n = 56</b> | <b>n = 33</b> | <b>n = 48</b> | <b>n = 51</b> | <b>n = 118</b> | <b>n = 35</b> | <b>n = 38</b> | <b>n = 31</b> | <b>n = 147</b> | <b>n = 75</b> | <b>n = 308</b> | <b>n = 105</b> |
| It was done as usual                                                                                                                        | 117 (11%)       | 7 (13%)       | 3 (9%)        | 7 (15%)       | 1 (2%)        | 8 (7%)         | 4 (11%)       | 4 (11%)       | 2 (6%)        | 12 (8%)        | 24 (32%)      | 40 (13%)       | 5 (5%)         |
| No appointments took place                                                                                                                  | 510 (49%)       | 23 (41%)      | 21 (64%)      | 22 (46%)      | 49 (96%)      | 70 (59%)       | 20 (57%)      | 10 (26%)      | 3 (10%)       | 75 (51%)       | 30 (40%)      | 147 (48%)      | 40 (38%)       |
| Fewer appointments took place                                                                                                               | 47 (4%)         | 0 (0%)        | 2 (6%)        | 1 (2%)        | 0 (0%)        | 10 (8%)        | 1 (3%)        | 4 (11%)       | 2 (6%)        | 9 (6%)         | 3 (4%)        | 8 (3%)         | 7 (7%)         |
| Other                                                                                                                                       | 371 (36%)       | 26 (46%)      | 7 (21%)       | 18 (38%)      | 1 (2%)        | 30 (25%)       | 10 (29%)      | 20 (53%)      | 24 (77%)      | 51 (35%)       | 18 (24%)      | 113 (37%)      | 53 (50%)       |
| <b>If you were permitted to have another person present with you during birth, for how long was this person permitted to stay with you?</b> |                 |               |               |               |               |                |               |               |               |                |               |                |                |
|                                                                                                                                             | <b>n = 481</b>  | <b>n = 51</b> | <b>n = 24</b> | <b>n = 44</b> | <b>n = 20</b> | <b>n = 85</b>  | <b>n = 18</b> | <b>n = 6</b>  | <b>n = 29</b> | <b>n = 14</b>  | <b>n = 71</b> | <b>n = 96</b>  | <b>n = 23</b>  |
| For the entire labour                                                                                                                       | 367 (76%)       | 46 (90%)      | 23 (96%)      | 38 (86%)      | 17 (85%)      | 67 (79%)       | 7 (39%)       | 1 (17%)       | 25 (86%)      | 9 (64%)        | 59 (83%)      | 60 (63%)       | 15 (65%)       |
| For a part of it                                                                                                                            | 114 (24%)       | 5 (10%)       | 1 (4%)        | 6 (14%)       | 3 (15%)       | 18 (21%)       | 11 (61%)      | 5 (83%)       | 4 (14%)       | 5 (36%)        | 12 (17%)      | 36 (38%)       | 8 (35%)        |



Supplementary Table S4. Presence with the newborn

|                                                                                                                                       | Total              | Australia        | Brazil           | Canada           | China            | France            | Italy            | Mexico           | New Zealand      | Poland            | Sweden            | Turkey            | Ukraine           |
|---------------------------------------------------------------------------------------------------------------------------------------|--------------------|------------------|------------------|------------------|------------------|-------------------|------------------|------------------|------------------|-------------------|-------------------|-------------------|-------------------|
| <b>Were you permitted to touch your baby in the incubator or bed?</b>                                                                 |                    |                  |                  |                  |                  |                   |                  |                  |                  |                   |                   |                   |                   |
|                                                                                                                                       | <b>n = 1047</b>    | <b>n = 56</b>    | <b>n = 33</b>    | <b>n = 49</b>    | <b>n = 52</b>    | <b>n = 118</b>    | <b>n = 35</b>    | <b>n = 38</b>    | <b>n = 31</b>    | <b>n = 147</b>    | <b>n = 75</b>     | <b>n = 308</b>    | <b>n = 105</b>    |
| Yes                                                                                                                                   | 754 (72%)          | 55 (98%)         | 33 (100%)        | 49 (100%)        | 4 (8%)           | 116 (98%)         | 32 (91%)         | 31 (82%)         | 31 (100%)        | 119 (81%)         | 74 (99%)          | 124 (40%)         | 86 (82%)          |
| No                                                                                                                                    | 293 (28%)          | 1 (2%)           | 0 (0%)           | 0 (0%)           | 48 (92%)         | 2 (2%)            | 3 (9%)           | 7 (18%)          | 0 (0%)           | 28 (19%)          | 1 (1%)            | 184 (60%)         | 19 (18%)          |
| <b>How often were you permitted to touch your baby in the incubator or bed?</b>                                                       |                    |                  |                  |                  |                  |                   |                  |                  |                  |                   |                   |                   |                   |
|                                                                                                                                       | <b>n = 1046</b>    | <b>n = 56</b>    | <b>n = 34</b>    | <b>n = 49</b>    | <b>n = 52</b>    | <b>n = 118</b>    | <b>n = 35</b>    | <b>n = 38</b>    | <b>n = 31</b>    | <b>n = 146</b>    | <b>n = 74</b>     | <b>n = 308</b>    | <b>n = 105</b>    |
| As often as I wanted                                                                                                                  | 491 (47%)          | 46 (82%)         | 29 (85%)         | 42 (86%)         | 0 (0%)           | 110 (93%)         | 20 (57%)         | 5 (13%)          | 31 (100%)        | 54 (37%)          | 72 (97%)          | 20 (6%)           | 62 (59%)          |
| At least once per day                                                                                                                 | 174 (17%)          | 9 (16%)          | 5 (15%)          | 7 (14%)          | 2 (4%)           | 6 (5%)            | 11 (31%)         | 20 (53%)         | 0 (0%)           | 33 (23%)          | 2 (3%)            | 57 (19%)          | 22 (21%)          |
| At least once per week                                                                                                                | 43 (4%)            | 1 (2%)           | 0 (0%)           | 0 (0%)           | 0 (0%)           | 0 (0%)            | 0 (0%)           | 3 (8%)           | 0 (0%)           | 15 (10%)          | 0 (0%)            | 24 (8%)           | 0 (0%)            |
| Less than once per week                                                                                                               | 73 (7%)            | 0 (0%)           | 0 (0%)           | 0 (0%)           | 2 (4%)           | 0 (0%)            | 2 (6%)           | 3 (8%)           | 0 (0%)           | 22 (15%)          | 0 (0%)            | 37 (12%)          | 7 (7%)            |
| Not so far                                                                                                                            | 265 (25%)          | 0 (0%)           | 0 (0%)           | 0 (0%)           | 48 (92%)         | 2 (2%)            | 2 (6%)           | 7 (18%)          | 0 (0%)           | 22 (15%)          | 0 (0%)            | 170 (55%)         | 14 (13%)          |
| <b>Were sleeping facilities provided so you could stay with the baby (24/7)?</b>                                                      |                    |                  |                  |                  |                  |                   |                  |                  |                  |                   |                   |                   |                   |
|                                                                                                                                       | <b>n = 984</b>     | <b>n = 55</b>    | <b>n = 33</b>    | <b>n = 48</b>    | <b>n = 51</b>    | <b>n = 110</b>    | <b>n = 34</b>    | <b>n = 37</b>    | <b>n = 31</b>    | <b>n = 129</b>    | <b>n = 74</b>     | <b>n = 286</b>    | <b>n = 96</b>     |
| Yes, sleeping facilities were provided next to my baby in the unit                                                                    | 179 (18%)          | 5 (9%)           | 4 (12%)          | 15 (31%)         | 5 (10%)          | 49 (45%)          | 4 (12%)          | 0 (0%)           | 1 (3%)           | 18 (14%)          | 41 (55%)          | 11 (4%)           | 26 (27%)          |
| Yes, sleeping facilities were provided outside the unit (e.g. in an apartment house nearby, in another unit)                          | 125 (13%)          | 5 (9%)           | 0 (0%)           | 6 (13%)          | 2 (4%)           | 8 (7%)            | 9 (26%)          | 0 (0%)           | 4 (13%)          | 18 (14%)          | 30 (41%)          | 11 (4%)           | 32 (33%)          |
| No, sleeping facilities were not provided                                                                                             | 680 (69%)          | 45 (82%)         | 29 (88%)         | 27 (56%)         | 44 (86%)         | 53 (48%)          | 21 (62%)         | 37 (100%)        | 26 (84%)         | 93 (72%)          | 3 (4%)            | 264 (92%)         | 38 (40%)          |
| <b>Which alternatives to being present were provided with your baby receiving special/intensive care? (multiple answers possible)</b> |                    |                  |                  |                  |                  |                   |                  |                  |                  |                   |                   |                   |                   |
|                                                                                                                                       | <b>n = 982</b>     | <b>n = 55</b>    | <b>n = 34</b>    | <b>n = 48</b>    | <b>n = 51</b>    | <b>n = 109</b>    | <b>n = 34</b>    | <b>n = 37</b>    | <b>n = 29</b>    | <b>n = 130</b>    | <b>n = 72</b>     | <b>n = 287</b>    | <b>n = 96</b>     |
| <b>Sum of multiple answers</b>                                                                                                        | <b>1122 (114%)</b> | <b>57 (104%)</b> | <b>39 (115%)</b> | <b>63 (131%)</b> | <b>59 (116%)</b> | <b>123 (113%)</b> | <b>35 (103%)</b> | <b>38 (103%)</b> | <b>30 (103%)</b> | <b>155 (119%)</b> | <b>100 (139%)</b> | <b>318 (111%)</b> | <b>105 (109%)</b> |
| Photos                                                                                                                                | 309 (32%)          | 6 (11%)          | 12 (35%)         | 12 (25%)         | 14 (27%)         | 28 (26%)          | 10 (29%)         | 5 (14%)          | 4 (14%)          | 69 (53%)          | 22 (31%)          | 114 (40%)         | 13 (14%)          |
| Livestream                                                                                                                            | 42 (4%)            | 6 (11%)          | 1 (3%)           | 5 (10%)          | 4 (8%)           | 1 (1%)            | 0 (0%)           | 1 (3%)           | 0 (0%)           | 16 (12%)          | 6 (8%)            | 0 (0%)            | 2 (2%)            |
| Recorded video                                                                                                                        | 74 (8%)            | 0 (0%)           | 2 (6%)           | 6 (13%)          | 3 (6%)           | 3 (3%)            | 1 (3%)           | 0 (0%)           | 0 (0%)           | 16 (12%)          | 12 (17%)          | 24 (8%)           | 7 (7%)            |
| Video calls                                                                                                                           | 52 (5%)            | 2 (4%)           | 2 (6%)           | 9 (19%)          | 1 (2%)           | 6 (6%)            | 1 (3%)           | 1 (3%)           | 5 (17%)          | 5 (4%)            | 14 (19%)          | 5 (2%)            | 1 (1%)            |
| None                                                                                                                                  | 542 (55%)          | 39 (71%)         | 19 (56%)         | 23 (48%)         | 26 (51%)         | 64 (59%)          | 20 (59%)         | 29 (78%)         | 20 (69%)         | 35 (27%)          | 30 (42%)          | 159 (55%)         | 78 (81%)          |
| Other                                                                                                                                 | 103 (11%)          | 4 (7%)           | 3 (9%)           | 8 (17%)          | 11 (22%)         | 21 (19%)          | 3 (9%)           | 2 (5%)           | 1 (3%)           | 14 (11%)          | 16 (22%)          | 16 (6%)           | 4 (4%)            |

Supplementary Table S5. 95% confidence interval of questions related to presence with the newborn and skin-to-skin care

|                                                                                                                                                                                                                                                                           | Total      | Australia   | Brazil      | Canada     | China       | France      | Italy       | Mexico      | New Zealand | Poland     | Sweden      | Turkey     | Ukraine    |
|---------------------------------------------------------------------------------------------------------------------------------------------------------------------------------------------------------------------------------------------------------------------------|------------|-------------|-------------|------------|-------------|-------------|-------------|-------------|-------------|------------|-------------|------------|------------|
| <b>Do you know if the Coronavirus/COVID-19 situation affected the facility policy around your ability to be present with the baby receiving special/intensive care?</b>                                                                                                   |            |             |             |            |             |             |             |             |             |            |             |            |            |
|                                                                                                                                                                                                                                                                           | n = 991    | n = 55      | n = 34      | n = 49     | n = 52      | n = 110     | n = 34      | n = 37      | n = 31      | n = 132    | n = 73      | n = 288    | n = 96     |
| Restrictions were implemented                                                                                                                                                                                                                                             | 0.80; 0.85 | 0.69; 0.91  | 0.77; 0.99  | 0.81; 0.98 | 0.57; 0.82  | 0.79; 0.92  | 0.66; 0.93  | 0.83; 1.01  | 0.67; 0.95  | 0.84; 0.95 | 0.49; 0.71  | 0.79; 0.88 | 0.75; 0.90 |
| <b>Could more than one person be present with the baby at the same time?</b>                                                                                                                                                                                              |            |             |             |            |             |             |             |             |             |            |             |            |            |
|                                                                                                                                                                                                                                                                           | n = 990    | n = 55      | n = 34      | n = 49     | n = 52      | n = 110     | n = 34      | n = 37      | n = 31      | n = 130    | n = 74      | n = 288    | n = 96     |
| Yes                                                                                                                                                                                                                                                                       | 0.30; 0.36 | 0.43; 0.69  | 0.12; 0.41  | 0.27; 0.55 | 0.38; 0.66  | 0.55; 0.73  | -0.02; 0.14 | -0.02; 0.13 | 0.34; 0.69  | 0.01; 0.07 | 0.75; 0.92  | 0.18; 0.28 | 0.09; 0.24 |
| <b>How long were you allowed to see your baby per visit?</b>                                                                                                                                                                                                              |            |             |             |            |             |             |             |             |             |            |             |            |            |
|                                                                                                                                                                                                                                                                           | n = 989    | n = 55      | n = 34      | n = 49     | n = 52      | n = 109     | n = 34      | n = 37      | n = 31      | n = 131    | n = 73      | n = 288    | n = 96     |
| Not at all                                                                                                                                                                                                                                                                | 0.18; 0.23 | n.a.        | -0.03; 0.09 | n.a.       | 0.77; 0.96  | -0.01; 0.03 | -0.02; 0.14 | 0.01; 0.21  | n.a.        | 0.18; 0.33 | -0.01; 0.04 | 0.28; 0.39 | 0.08; 0.22 |
| <b>Do you feel that the measures that were implemented due to Coronavirus/COVID-19 (e.g. restrictions by hospital management) made it more difficult for you to be present with your baby?</b>                                                                            |            |             |             |            |             |             |             |             |             |            |             |            |            |
|                                                                                                                                                                                                                                                                           | n = 990    | n = 55      | n = 34      | n = 48     | n = 51      | n = 110     | n = 34      | n = 37      | n = 31      | n = 132    | n = 74      | n = 288    | n = 96     |
| Yes                                                                                                                                                                                                                                                                       | 0.71; 0.76 | 0.47; 0.73  | 0.36; 0.70  | 0.65; 0.89 | 0.65; 0.88  | 0.46; 0.65  | 0.39; 0.73  | 0.87; 1.02  | 0.48; 0.81  | 0.79; 0.91 | 0.1; 0.28   | 0.88; 0.95 | 0.7; 0.86  |
| <b>Do you feel that the measures that were implemented due to Coronavirus/COVID-19 (e.g. restrictions by hospital management) made it more difficult for you to be interactive with your baby (e.g. skin-to-skin contact or being involved in the care of your baby)?</b> |            |             |             |            |             |             |             |             |             |            |             |            |            |
|                                                                                                                                                                                                                                                                           | n = 989    | n = 55      | n = 34      | n = 49     | n = 51      | n = 110     | n = 34      | n = 37      | n = 31      | n = 132    | n = 74      | n = 286    | n = 96     |
| Yes                                                                                                                                                                                                                                                                       | 0.61; 0.67 | 0.12; 0.35  | 0.27; 0.61  | 0.41; 0.69 | 0.63; 0.86  | 0.28; 0.46  | 0.45; 0.78  | 0.92; 1.03  | 0.13; 0.45  | 0.74; 0.87 | 0.05; 0.20  | 0.90; 0.96 | 0.45; 0.65 |
| <b>When was skin-to-skin contact with your baby and one of the parents initiated (e.g. holding the baby on the chest, kangaroo mother care)?</b>                                                                                                                          |            |             |             |            |             |             |             |             |             |            |             |            |            |
|                                                                                                                                                                                                                                                                           | n = 1044   | n = 56      | n = 33      | n = 49     | n = 52      | n = 117     | n = 35      | n = 38      | n = 31      | n = 146    | n = 75      | n = 308    | n = 104    |
| Not during the time in the hospital if discharged                                                                                                                                                                                                                         | 0.21; 0.26 | n.a.        | -0.03; 0.09 | n.a.       | -0.01; 0.09 | -0.01; 0.03 | 0.07; 0.33  | 0.31; 0.63  | n.a.        | 0.25; 0.40 | n.a.        | 0.43; 0.55 | 0.08; 0.22 |
| <b>How often were you permitted to have skin-to-skin contact (kangaroo mother care) with your baby?</b>                                                                                                                                                                   |            |             |             |            |             |             |             |             |             |            |             |            |            |
|                                                                                                                                                                                                                                                                           | n = 1043   | n = 56      | n = 32      | n = 49     | n = 52      | n = 118     | n = 34      | n = 38      | n = 31      | n = 146    | n = 75      | n = 308    | n = 104    |
| As often as I wanted                                                                                                                                                                                                                                                      | 0.26; 0.32 | 0.20; 0.44  | 0.27; 0.61  | 0.37; 0.65 | n.a.        | 0.77; 0.91  | 0.09; 0.38  | n.a.        | 0.34; 0.69  | 0.04; 0.13 | 0.76; 0.92  | 0.01; 0.06 | 0.25; 0.44 |
| <b>Did medical/nursing staff involve you in the care of your baby (e.g. nappy changing, feeding, temperature taking)?</b>                                                                                                                                                 |            |             |             |            |             |             |             |             |             |            |             |            |            |
|                                                                                                                                                                                                                                                                           | n = 989    | n = 55      | n = 34      | n = 49     | n = 51      | n = 110     | n = 34      | n = 37      | n = 31      | n = 131    | n = 74      | n = 287    | n = 96     |
| No, not at all                                                                                                                                                                                                                                                            | 0.34; 0.40 | -0.02; 0.05 | 0.12; 0.41  | n.a.       | 0.67; 0.90  | -0.01; 0.03 | -0.02; 0.14 | 0.38; 0.70  | n.a.        | 0.32; 0.49 | n.a.        | 0.68; 0.79 | 0.19; 0.37 |
| <b>Did medical/nursing staff involve your partner in the care of your baby?</b>                                                                                                                                                                                           |            |             |             |            |             |             |             |             |             |            |             |            |            |
|                                                                                                                                                                                                                                                                           | n = 990    | n = 55      | n = 34      | n = 49     | n = 51      | n = 110     | n = 34      | n = 37      | n = 31      | n = 131    | n = 74      | n = 288    | n = 96     |
| No, not at all                                                                                                                                                                                                                                                            | 0.54; 0.60 | -0.02; 0.05 | 0.39; 0.73  | 0.03; 0.21 | 0.65; 0.88  | 0.01; 0.10  | 0.05; 0.30  | 0.49; 0.80  | 0.03; 0.29  | 0.81; 0.93 | 0.00; 0.09  | 0.88; 0.95 | 0.77; 0.92 |

Supplementary Table S6. Information on breastfeeding/nutrition

|                                                                                                                          | Total              | Australia        | Brazil           | Canada           | China            | France            | Italy            | Mexico           | New Zealand      | Poland            | Sweden            | Turkey            | Ukraine           |
|--------------------------------------------------------------------------------------------------------------------------|--------------------|------------------|------------------|------------------|------------------|-------------------|------------------|------------------|------------------|-------------------|-------------------|-------------------|-------------------|
| <b>Was initiation of breastfeeding encouraged by medical/nursing staff?</b>                                              |                    |                  |                  |                  |                  |                   |                  |                  |                  |                   |                   |                   |                   |
|                                                                                                                          | <b>n = 1024</b>    | <b>n = 55</b>    | <b>n = 34</b>    | <b>n = 49</b>    | <b>n = 51</b>    | <b>n = 115</b>    | <b>n = 34</b>    | <b>n = 38</b>    | <b>n = 31</b>    | <b>n = 140</b>    | <b>n = 75</b>     | <b>n = 299</b>    | <b>n = 103</b>    |
| Yes, highly encouraged                                                                                                   | 515 (50%)          | 48 (87%)         | 23 (68%)         | 30 (61%)         | 50 (98%)         | 78 (68%)          | 13 (38%)         | 20 (53%)         | 23 (74%)         | 52 (37%)          | 35 (47%)          | 95 (32%)          | 48 (47%)          |
| Yes, somewhat encouraged                                                                                                 | 265 (26%)          | 5 (9%)           | 6 (18%)          | 12 (24%)         | 0 (0%)           | 24 (21%)          | 9 (26%)          | 15 (39%)         | 5 (16%)          | 41 (29%)          | 31 (41%)          | 82 (27%)          | 35 (34%)          |
| No, not encouraged at all                                                                                                | 189 (18%)          | 1 (2%)           | 4 (12%)          | 5 (10%)          | 0 (0%)           | 10 (9%)           | 11 (32%)         | 3 (8%)           | 0 (0%)           | 39 (28%)          | 9 (12%)           | 89 (30%)          | 18 (17%)          |
| Don't know                                                                                                               | 55 (5%)            | 1 (2%)           | 1 (3%)           | 2 (4%)           | 1 (2%)           | 3 (3%)            | 1 (3%)           | 0 (0%)           | 3 (10%)          | 8 (6%)            | 0 (0%)            | 33 (11%)          | 2 (2%)            |
| <b>Was your baby breastfed or provided with mother's own pumped/expressed breastmilk in the first weeks after birth?</b> |                    |                  |                  |                  |                  |                   |                  |                  |                  |                   |                   |                   |                   |
|                                                                                                                          | <b>n = 1023</b>    | <b>n = 55</b>    | <b>n = 34</b>    | <b>n = 49</b>    | <b>n = 51</b>    | <b>n = 114</b>    | <b>n = 34</b>    | <b>n = 38</b>    | <b>n = 30</b>    | <b>n = 141</b>    | <b>n = 75</b>     | <b>n = 299</b>    | <b>n = 103</b>    |
| Yes, exclusively                                                                                                         | 506 (49%)          | 38 (69%)         | 14 (41%)         | 25 (51%)         | 31 (61%)         | 53 (46%)          | 15 (44%)         | 9 (24%)          | 22 (73%)         | 67 (48%)          | 24 (32%)          | 178 (60%)         | 30 (29%)          |
| Yes, partly                                                                                                              | 436 (43%)          | 16 (29%)         | 17 (50%)         | 22 (45%)         | 18 (35%)         | 46 (40%)          | 16 (47%)         | 24 (63%)         | 7 (23%)          | 54 (38%)          | 45 (60%)          | 116 (39%)         | 55 (53%)          |
| No, not at all                                                                                                           | 76 (7%)            | 1 (2%)           | 3 (9%)           | 1 (2%)           | 2 (4%)           | 14 (12%)          | 3 (9%)           | 5 (13%)          | 1 (3%)           | 18 (13%)          | 6 (8%)            | 4 (1%)            | 18 (17%)          |
| Don't know                                                                                                               | 5 (0%)             | 0 (0%)           | 0 (0%)           | 1 (2%)           | 0 (0%)           | 1 (1%)            | 0 (0%)           | 0 (0%)           | 0 (0%)           | 2 (1%)            | 0 (0%)            | 1 (0%)            | 0 (0%)            |
| <b>When did the initiation of breastfeeding or provision of mother's own pumped/expressed breastmilk take place?</b>     |                    |                  |                  |                  |                  |                   |                  |                  |                  |                   |                   |                   |                   |
|                                                                                                                          | <b>n = 1026</b>    | <b>n = 55</b>    | <b>n = 34</b>    | <b>n = 49</b>    | <b>n = 51</b>    | <b>n = 115</b>    | <b>n = 34</b>    | <b>n = 38</b>    | <b>n = 31</b>    | <b>n = 141</b>    | <b>n = 75</b>     | <b>n = 300</b>    | <b>n = 103</b>    |
| Not applicable; baby was not breastfed                                                                                   | 56 (5%)            | 1 (2%)           | 2 (6%)           | 0 (0%)           | 2 (4%)           | 12 (10%)          | 2 (6%)           | 4 (11%)          | 0 (0%)           | 19 (13%)          | 3 (4%)            | 1 (0%)            | 10 (10%)          |
| On the first day                                                                                                         | 348 (34%)          | 29 (53%)         | 5 (15%)          | 28 (57%)         | 8 (16%)          | 60 (52%)          | 10 (29%)         | 1 (3%)           | 17 (55%)         | 39 (28%)          | 23 (31%)          | 112 (37%)         | 16 (16%)          |
| After the first day but during the first week                                                                            | 409 (40%)          | 21 (38%)         | 18 (53%)         | 18 (37%)         | 34 (67%)         | 10 (9%)           | 14 (41%)         | 13 (34%)         | 9 (29%)          | 64 (45%)          | 41 (55%)          | 125 (42%)         | 42 (41%)          |
| After the first week                                                                                                     | 172 (17%)          | 4 (7%)           | 9 (26%)          | 2 (4%)           | 4 (8%)           | 26 (23%)          | 7 (21%)          | 19 (50%)         | 4 (13%)          | 13 (9%)           | 7 (9%)            | 45 (15%)          | 32 (31%)          |
| Don't know                                                                                                               | 41 (4%)            | 0 (0%)           | 0 (0%)           | 1 (2%)           | 3 (6%)           | 7 (6%)            | 1 (3%)           | 1 (3%)           | 1 (3%)           | 6 (4%)            | 1 (1%)            | 17 (6%)           | 3 (3%)            |
| <b>Were you allowed to bring expressed milk from home to the unit?</b>                                                   |                    |                  |                  |                  |                  |                   |                  |                  |                  |                   |                   |                   |                   |
|                                                                                                                          | <b>n = 1024</b>    | <b>n = 55</b>    | <b>n = 34</b>    | <b>n = 49</b>    | <b>n = 51</b>    | <b>n = 115</b>    | <b>n = 34</b>    | <b>n = 38</b>    | <b>n = 31</b>    | <b>n = 141</b>    | <b>n = 74</b>     | <b>n = 299</b>    | <b>n = 103</b>    |
| Not applicable; baby was not breastfed                                                                                   | 41 (4%)            | 1 (2%)           | 0 (0%)           | 0 (0%)           | 0 (0%)           | 12 (10%)          | 1 (3%)           | 2 (5%)           | 1 (3%)           | 7 (5%)            | 4 (5%)            | 3 (1%)            | 10 (10%)          |
| Yes                                                                                                                      | 782 (76%)          | 52 (95%)         | 8 (24%)          | 46 (94%)         | 51 (100%)        | 79 (69%)          | 30 (88%)         | 26 (68%)         | 25 (81%)         | 99 (70%)          | 46 (62%)          | 282 (94%)         | 38 (37%)          |
| No, the milk had to be expressed at the hospital                                                                         | 121 (12%)          | 1 (2%)           | 24 (71%)         | 1 (2%)           | 0 (0%)           | 16 (14%)          | 3 (9%)           | 8 (21%)          | 2 (6%)           | 11 (8%)           | 15 (20%)          | 7 (2%)            | 33 (32%)          |
| No, other                                                                                                                | 80 (8%)            | 1 (2%)           | 2 (6%)           | 2 (4%)           | 0 (0%)           | 8 (7%)            | 0 (0%)           | 2 (5%)           | 3 (10%)          | 24 (17%)          | 9 (12%)           | 7 (2%)            | 22 (21%)          |
| <b>How was your baby fed? (multiple answers possible)</b>                                                                |                    |                  |                  |                  |                  |                   |                  |                  |                  |                   |                   |                   |                   |
|                                                                                                                          | <b>n = 1027</b>    | <b>n = 55</b>    | <b>n = 34</b>    | <b>n = 49</b>    | <b>n = 52</b>    | <b>n = 115</b>    | <b>n = 34</b>    | <b>n = 38</b>    | <b>n = 31</b>    | <b>n = 141</b>    | <b>n = 75</b>     | <b>n = 300</b>    | <b>n = 103</b>    |
| <b>Sum of multiple answers</b>                                                                                           | <b>1505 (147%)</b> | <b>83 (151%)</b> | <b>57 (168%)</b> | <b>91 (186%)</b> | <b>79 (152%)</b> | <b>192 (167%)</b> | <b>57 (168%)</b> | <b>59 (155%)</b> | <b>39 (126%)</b> | <b>214 (152%)</b> | <b>122 (163%)</b> | <b>366 (122%)</b> | <b>146 (142%)</b> |
| With breastmilk (breastfeeding or pumped milk)                                                                           | 912 (89%)          | 54 (98%)         | 30 (88%)         | 48 (98%)         | 50 (96%)         | 97 (84%)          | 30 (88%)         | 32 (84%)         | 30 (97%)         | 123 (87%)         | 60 (80%)          | 286 (95%)         | 72 (70%)          |
| With donor milk                                                                                                          | 229 (22%)          | 14 (25%)         | 6 (18%)          | 29 (59%)         | 14 (27%)         | 51 (44%)          | 11 (32%)         | 2 (5%)           | 4 (13%)          | 38 (27%)          | 44 (59%)          | 4 (1%)            | 12 (12%)          |
| With formula milk                                                                                                        | 352 (34%)          | 15 (27%)         | 20 (59%)         | 14 (29%)         | 15 (29%)         | 44 (38%)          | 15 (44%)         | 25 (66%)         | 5 (16%)          | 53 (38%)          | 18 (24%)          | 68 (23%)          | 60 (58%)          |
| Don't know                                                                                                               | 12 (1%)            | 0 (0%)           | 1 (3%)           | 0 (0%)           | 0 (0%)           | 0 (0%)            | 1 (3%)           | 0 (0%)           | 0 (0%)           | 0 (0%)            | 0 (0%)            | 8 (3%)            | 2 (2%)            |

Supplementary Table S7. Information on health communication

|                                                                                                                                                                      | Total              | Australia        | Brazil           | Canada           | China            | France            | Italy            | Mexico           | New Zealand      | Poland            | Sweden            | Turkey            | Ukraine           |
|----------------------------------------------------------------------------------------------------------------------------------------------------------------------|--------------------|------------------|------------------|------------------|------------------|-------------------|------------------|------------------|------------------|-------------------|-------------------|-------------------|-------------------|
| <b>Do you feel you received or are receiving adequate general health information about your baby during the hospital stay?</b>                                       |                    |                  |                  |                  |                  |                   |                  |                  |                  |                   |                   |                   |                   |
|                                                                                                                                                                      | <b>n = 982</b>     | <b>n = 55</b>    | <b>n = 34</b>    | <b>n = 49</b>    | <b>n = 51</b>    | <b>n = 110</b>    | <b>n = 34</b>    | <b>n = 35</b>    | <b>n = 30</b>    | <b>n = 132</b>    | <b>n = 74</b>     | <b>n = 283</b>    | <b>n = 95</b>     |
| Yes, to a high degree                                                                                                                                                | 451 (46%)          | 36 (65%)         | 18 (53%)         | 29 (59%)         | 20 (39%)         | 62 (56%)          | 18 (53%)         | 13 (37%)         | 20 (67%)         | 50 (38%)          | 57 (77%)          | 96 (34%)          | 32 (34%)          |
| Yes, to some degree                                                                                                                                                  | 424 (43%)          | 15 (27%)         | 14 (41%)         | 18 (37%)         | 23 (45%)         | 37 (34%)          | 15 (44%)         | 16 (46%)         | 9 (30%)          | 60 (45%)          | 14 (19%)          | 156 (55%)         | 47 (49%)          |
| No, not at all                                                                                                                                                       | 83 (8%)            | 4 (7%)           | 1 (3%)           | 2 (4%)           | 2 (4%)           | 9 (8%)            | 1 (3%)           | 5 (14%)          | 1 (3%)           | 21 (16%)          | 3 (4%)            | 24 (8%)           | 10 (11%)          |
| Don't know                                                                                                                                                           | 9 (1%)             | 0 (0%)           | 0 (0%)           | 0 (0%)           | 1 (2%)           | 1 (1%)            | 0 (0%)           | 0 (0%)           | 0 (0%)           | 0 (0%)            | 0 (0%)            | 3 (1%)            | 4 (4%)            |
| I didn't receive any information                                                                                                                                     | 15 (2%)            | 0 (0%)           | 1 (3%)           | 0 (0%)           | 5 (10%)          | 1 (1%)            | 0 (0%)           | 1 (3%)           | 0 (0%)           | 1 (1%)            | 0 (0%)            | 4 (1%)            | 2 (2%)            |
| <b>How did you receive health information about your baby during the time your baby received or is receiving special/intensive care? (multiple answers possible)</b> |                    |                  |                  |                  |                  |                   |                  |                  |                  |                   |                   |                   |                   |
|                                                                                                                                                                      | <b>n = 982</b>     | <b>n = 55</b>    | <b>n = 34</b>    | <b>n = 49</b>    | <b>n = 52</b>    | <b>n = 110</b>    | <b>n = 34</b>    | <b>n = 35</b>    | <b>n = 30</b>    | <b>n = 132</b>    | <b>n = 74</b>     | <b>n = 282</b>    | <b>n = 95</b>     |
| <b>Sum of multiple answers</b>                                                                                                                                       | <b>1392 (142%)</b> | <b>96 (175%)</b> | <b>40 (118%)</b> | <b>96 (196%)</b> | <b>78 (150%)</b> | <b>166 (151%)</b> | <b>47 (138%)</b> | <b>40 (114%)</b> | <b>54 (180%)</b> | <b>180 (136%)</b> | <b>111 (150%)</b> | <b>359 (127%)</b> | <b>125 (132%)</b> |
| Meetings with medical/nursing staff (face to face)                                                                                                                   | 743 (76%)          | 50 (91%)         | 34 (100%)        | 46 (94%)         | 24 (46%)         | 96 (87%)          | 31 (91%)         | 28 (80%)         | 28 (93%)         | 79 (60%)          | 74 (100%)         | 164 (58%)         | 89 (94%)          |
| Meetings with medical/nursing staff (video conference)                                                                                                               | 28 (3%)            | 2 (4%)           | 0 (0%)           | 8 (16%)          | 2 (4%)           | 4 (4%)            | 1 (3%)           | 0 (0%)           | 2 (7%)           | 1 (1%)            | 4 (5%)            | 4 (1%)            | 0 (0%)            |
| Phone calls                                                                                                                                                          | 491 (50%)          | 28 (51%)         | 5 (15%)          | 28 (57%)         | 48 (92%)         | 51 (46%)          | 8 (24%)          | 7 (20%)          | 11 (37%)         | 88 (67%)          | 12 (16%)          | 178 (63%)         | 27 (28%)          |
| E-Mails                                                                                                                                                              | 8 (1%)             | 0 (0%)           | 0 (0%)           | 0 (0%)           | 0 (0%)           | 2 (2%)            | 0 (0%)           | 0 (0%)           | 0 (0%)           | 4 (3%)            | 0 (0%)            | 1 (0%)            | 1 (1%)            |
| Letters                                                                                                                                                              | 2 (0%)             | 0 (0%)           | 0 (0%)           | 0 (0%)           | 0 (0%)           | 0 (0%)            | 0 (0%)           | 0 (0%)           | 2 (7%)           | 0 (0%)            | 0 (0%)            | 0 (0%)            | 0 (0%)            |
| Information material (e.g. brochure, website)                                                                                                                        | 84 (9%)            | 13 (24%)         | 0 (0%)           | 11 (22%)         | 3 (6%)           | 9 (8%)            | 3 (9%)           | 2 (6%)           | 10 (33%)         | 5 (4%)            | 21 (28%)          | 2 (1%)            | 5 (5%)            |
| I didn't receive information                                                                                                                                         | 10 (1%)            | 0 (0%)           | 0 (0%)           | 0 (0%)           | 0 (0%)           | 1 (1%)            | 2 (6%)           | 0 (0%)           | 0 (0%)           | 1 (1%)            | 0 (0%)            | 4 (1%)            | 2 (2%)            |
| Other                                                                                                                                                                | 26 (3%)            | 3 (5%)           | 1 (3%)           | 3 (6%)           | 1 (2%)           | 3 (3%)            | 2 (6%)           | 3 (9%)           | 1 (3%)           | 2 (2%)            | 0 (0%)            | 6 (2%)            | 1 (1%)            |
| <b>How often did you receive information about your baby during the time your baby received or is receiving special/intensive care?</b>                              |                    |                  |                  |                  |                  |                   |                  |                  |                  |                   |                   |                   |                   |
|                                                                                                                                                                      | <b>n = 983</b>     | <b>n = 55</b>    | <b>n = 34</b>    | <b>n = 49</b>    | <b>n = 52</b>    | <b>n = 110</b>    | <b>n = 34</b>    | <b>n = 35</b>    | <b>n = 30</b>    | <b>n = 132</b>    | <b>n = 74</b>     | <b>n = 283</b>    | <b>n = 95</b>     |
| Multiple times per day                                                                                                                                               | 261 (27%)          | 30 (55%)         | 5 (15%)          | 23 (47%)         | 1 (2%)           | 59 (54%)          | 9 (26%)          | 5 (14%)          | 15 (50%)         | 22 (17%)          | 42 (57%)          | 28 (10%)          | 22 (23%)          |
| Once per day                                                                                                                                                         | 494 (50%)          | 19 (35%)         | 27 (79%)         | 21 (43%)         | 2 (4%)           | 40 (36%)          | 15 (44%)         | 27 (77%)         | 10 (33%)         | 72 (55%)          | 22 (30%)          | 176 (62%)         | 63 (66%)          |
| Multiple times per week                                                                                                                                              | 168 (17%)          | 4 (7%)           | 2 (6%)           | 2 (4%)           | 32 (62%)         | 6 (5%)            | 7 (21%)          | 2 (6%)           | 3 (10%)          | 34 (26%)          | 9 (12%)           | 59 (21%)          | 8 (8%)            |
| Once per week                                                                                                                                                        | 33 (3%)            | 1 (2%)           | 0 (0%)           | 0 (0%)           | 9 (17%)          | 2 (2%)            | 2 (6%)           | 0 (0%)           | 1 (3%)           | 2 (2%)            | 0 (0%)            | 15 (5%)           | 1 (1%)            |
| Less than once per week                                                                                                                                              | 13 (1%)            | 1 (2%)           | 0 (0%)           | 1 (2%)           | 3 (6%)           | 2 (2%)            | 1 (3%)           | 1 (3%)           | 0 (0%)           | 1 (1%)            | 0 (0%)            | 2 (1%)            | 1 (1%)            |
| Never                                                                                                                                                                | 8 (1%)             | 0 (0%)           | 0 (0%)           | 1 (2%)           | 2 (4%)           | 1 (1%)            | 0 (0%)           | 0 (0%)           | 0 (0%)           | 1 (1%)            | 1 (1%)            | 2 (1%)            | 0 (0%)            |
| Don't know                                                                                                                                                           | 6 (1%)             | 0 (0%)           | 0 (0%)           | 1 (2%)           | 3 (6%)           | 0 (0%)            | 0 (0%)           | 0 (0%)           | 1 (3%)           | 0 (0%)            | 0 (0%)            | 1 (0%)            | 0 (0%)            |

Supplementary Table S7. Information on health communication (continued)

|                                                                                                                                                                                                                           | Total          | Australia     | Brazil        | Canada        | China         | France         | Italy         | Mexico        | New Zealand   | Poland         | Sweden        | Turkey         | Ukraine       |
|---------------------------------------------------------------------------------------------------------------------------------------------------------------------------------------------------------------------------|----------------|---------------|---------------|---------------|---------------|----------------|---------------|---------------|---------------|----------------|---------------|----------------|---------------|
| <b>Do you feel you received or are receiving adequate information about how to protect yourself and your baby from Coronavirus/COVID-19 transmission while your baby received or is receiving special/intensive care?</b> |                |               |               |               |               |                |               |               |               |                |               |                |               |
|                                                                                                                                                                                                                           | <b>n = 983</b> | <b>n = 55</b> | <b>n = 34</b> | <b>n = 49</b> | <b>n = 52</b> | <b>n = 110</b> | <b>n = 34</b> | <b>n = 35</b> | <b>n = 30</b> | <b>n = 132</b> | <b>n = 74</b> | <b>n = 283</b> | <b>n = 95</b> |
| Yes, to a high degree                                                                                                                                                                                                     | 321 (33%)      | 22 (40%)      | 12 (35%)      | 13 (27%)      | 26 (50%)      | 43 (39%)       | 21 (62%)      | 12 (34%)      | 11 (37%)      | 30 (23%)       | 31 (42%)      | 73 (26%)       | 27 (28%)      |
| Yes, to some degree                                                                                                                                                                                                       | 334 (34%)      | 23 (42%)      | 14 (41%)      | 22 (45%)      | 15 (29%)      | 38 (35%)       | 8 (24%)       | 15 (43%)      | 12 (40%)      | 37 (28%)       | 23 (31%)      | 92 (33%)       | 35 (37%)      |
| No, not at all                                                                                                                                                                                                            | 187 (19%)      | 3 (5%)        | 4 (12%)       | 11 (22%)      | 2 (4%)        | 18 (16%)       | 3 (9%)        | 5 (14%)       | 3 (10%)       | 29 (22%)       | 14 (19%)      | 80 (28%)       | 15 (16%)      |
| Don't know                                                                                                                                                                                                                | 49 (5%)        | 2 (4%)        | 0 (0%)        | 1 (2%)        | 5 (10%)       | 2 (2%)         | 1 (3%)        | 2 (6%)        | 0 (0%)        | 15 (11%)       | 5 (7%)        | 9 (3%)         | 7 (7%)        |
| I didn't receive any information                                                                                                                                                                                          | 92 (9%)        | 5 (9%)        | 4 (12%)       | 2 (4%)        | 4 (8%)        | 9 (8%)         | 1 (3%)        | 1 (3%)        | 4 (13%)       | 21 (16%)       | 1 (1%)        | 29 (10%)       | 11 (12%)      |
| <b>Do you feel you received adequate information about Coronavirus/COVID-19 when discharged from the hospital?</b>                                                                                                        |                |               |               |               |               |                |               |               |               |                |               |                |               |
|                                                                                                                                                                                                                           | <b>n = 982</b> | <b>n = 55</b> | <b>n = 34</b> | <b>n = 49</b> | <b>n = 52</b> | <b>n = 110</b> | <b>n = 34</b> | <b>n = 35</b> | <b>n = 30</b> | <b>n = 132</b> | <b>n = 74</b> | <b>n = 282</b> | <b>n = 95</b> |
| Yes, to a high degree                                                                                                                                                                                                     | 204 (21%)      | 14 (25%)      | 6 (18%)       | 5 (10%)       | 20 (38%)      | 29 (26%)       | 14 (41%)      | 6 (17%)       | 2 (7%)        | 22 (17%)       | 18 (24%)      | 51 (18%)       | 17 (18%)      |
| Yes, to some degree                                                                                                                                                                                                       | 224 (23%)      | 16 (29%)      | 14 (41%)      | 19 (39%)      | 15 (29%)      | 21 (19%)       | 10 (29%)      | 9 (26%)       | 8 (27%)       | 15 (11%)       | 16 (22%)      | 62 (22%)       | 19 (20%)      |
| No, not at all                                                                                                                                                                                                            | 217 (22%)      | 7 (13%)       | 5 (15%)       | 12 (24%)      | 1 (2%)        | 29 (26%)       | 6 (18%)       | 10 (29%)      | 7 (23%)       | 20 (15%)       | 20 (27%)      | 77 (27%)       | 23 (24%)      |
| Don't know                                                                                                                                                                                                                | 35 (4%)        | 1 (2%)        | 0 (0%)        | 0 (0%)        | 3 (6%)        | 3 (3%)         | 0 (0%)        | 2 (6%)        | 0 (0%)        | 8 (6%)         | 2 (3%)        | 8 (3%)         | 8 (8%)        |
| I didn't receive any information                                                                                                                                                                                          | 157 (16%)      | 10 (18%)      | 4 (12%)       | 6 (12%)       | 2 (4%)        | 15 (14%)       | 2 (6%)        | 4 (11%)       | 5 (17%)       | 50 (38%)       | 8 (11%)       | 34 (12%)       | 17 (18%)      |
| No discharge yet                                                                                                                                                                                                          | 145 (15%)      | 7 (13%)       | 5 (15%)       | 7 (14%)       | 11 (21%)      | 13 (12%)       | 2 (6%)        | 4 (11%)       | 8 (27%)       | 17 (13%)       | 10 (14%)      | 50 (18%)       | 11 (12%)      |

Supplementary Table S8. Information on mental health status

|                                                                                                                                                                                      | Total              | Australia        | Brazil           | Canada           | China            | France            | Italy            | Mexico           | New Zealand      | Poland            | Sweden           | Turkey            | Ukraine           |
|--------------------------------------------------------------------------------------------------------------------------------------------------------------------------------------|--------------------|------------------|------------------|------------------|------------------|-------------------|------------------|------------------|------------------|-------------------|------------------|-------------------|-------------------|
| <b>Did you worry because of the Coronavirus/COVID-19 situation during pregnancy?</b>                                                                                                 |                    |                  |                  |                  |                  |                   |                  |                  |                  |                   |                  |                   |                   |
|                                                                                                                                                                                      | <b>n = 966</b>     | <b>n = 55</b>    | <b>n = 33</b>    | <b>n = 48</b>    | <b>n = 50</b>    | <b>n = 107</b>    | <b>n = 34</b>    | <b>n = 34</b>    | <b>n = 30</b>    | <b>n = 132</b>    | <b>n = 71</b>    | <b>n = 278</b>    | <b>n = 94</b>     |
| Yes, to a high degree                                                                                                                                                                | 459 (48%)          | 25 (45%)         | 17 (52%)         | 20 (42%)         | 9 (18%)          | 35 (33%)          | 13 (38%)         | 24 (71%)         | 11 (37%)         | 66 (50%)          | 25 (35%)         | 157 (56%)         | 57 (61%)          |
| Yes, to some degree                                                                                                                                                                  | 304 (31%)          | 19 (35%)         | 7 (21%)          | 19 (40%)         | 17 (34%)         | 44 (41%)          | 17 (50%)         | 6 (18%)          | 15 (50%)         | 39 (30%)          | 27 (38%)         | 66 (24%)          | 28 (30%)          |
| No, not at all                                                                                                                                                                       | 100 (10%)          | 5 (9%)           | 0 (0%)           | 5 (10%)          | 20 (40%)         | 11 (10%)          | 1 (3%)           | 1 (3%)           | 3 (10%)          | 11 (8%)           | 14 (20%)         | 23 (8%)           | 6 (6%)            |
| Don't know                                                                                                                                                                           | 12 (1%)            | 0 (0%)           | 0 (0%)           | 0 (0%)           | 0 (0%)           | 3 (3%)            | 1 (3%)           | 0 (0%)           | 0 (0%)           | 5 (4%)            | 0 (0%)           | 3 (1%)            | 0 (0%)            |
| Coronavirus/COVID-19 was not an issue then                                                                                                                                           | 91 (9%)            | 6 (11%)          | 9 (27%)          | 4 (8%)           | 4 (8%)           | 14 (13%)          | 2 (6%)           | 3 (9%)           | 1 (3%)           | 11 (8%)           | 5 (7%)           | 29 (10%)          | 3 (3%)            |
| <b>Did (or do) you struggle to be present with your baby who received or is receiving special care due to other obligations you have (e.g. for other children, family member/s)?</b> |                    |                  |                  |                  |                  |                   |                  |                  |                  |                   |                  |                   |                   |
|                                                                                                                                                                                      | <b>n = 966</b>     | <b>n = 55</b>    | <b>n = 33</b>    | <b>n = 48</b>    | <b>n = 51</b>    | <b>n = 107</b>    | <b>n = 34</b>    | <b>n = 34</b>    | <b>n = 30</b>    | <b>n = 131</b>    | <b>n = 72</b>    | <b>n = 278</b>    | <b>n = 93</b>     |
| Yes, to a high degree                                                                                                                                                                | 207 (21%)          | 13 (24%)         | 5 (15%)          | 12 (25%)         | 7 (14%)          | 16 (15%)          | 2 (6%)           | 13 (38%)         | 4 (13%)          | 21 (16%)          | 24 (33%)         | 70 (25%)          | 20 (22%)          |
| Yes, to some degree                                                                                                                                                                  | 261 (27%)          | 12 (22%)         | 8 (24%)          | 15 (31%)         | 12 (24%)         | 28 (26%)          | 7 (21%)          | 7 (21%)          | 12 (40%)         | 22 (17%)          | 27 (38%)         | 81 (29%)          | 30 (32%)          |
| No, not at all                                                                                                                                                                       | 440 (46%)          | 30 (55%)         | 20 (61%)         | 21 (44%)         | 27 (53%)         | 62 (58%)          | 25 (74%)         | 13 (38%)         | 14 (47%)         | 66 (50%)          | 19 (26%)         | 108 (39%)         | 35 (38%)          |
| Don't know                                                                                                                                                                           | 58 (6%)            | 0 (0%)           | 0 (0%)           | 0 (0%)           | 5 (10%)          | 1 (1%)            | 0 (0%)           | 1 (3%)           | 0 (0%)           | 22 (17%)          | 2 (3%)           | 19 (7%)           | 8 (9%)            |
| <b>What kind of support was offered? (multiple answers possible)</b>                                                                                                                 |                    |                  |                  |                  |                  |                   |                  |                  |                  |                   |                  |                   |                   |
|                                                                                                                                                                                      | <b>n = 967</b>     | <b>n = 55</b>    | <b>n = 32</b>    | <b>n = 48</b>    | <b>n = 51</b>    | <b>n = 107</b>    | <b>n = 34</b>    | <b>n = 34</b>    | <b>n = 30</b>    | <b>n = 132</b>    | <b>n = 72</b>    | <b>n = 278</b>    | <b>n = 94</b>     |
| <b>Sum of multiple answers</b>                                                                                                                                                       | <b>1239 (128%)</b> | <b>94 (171%)</b> | <b>36 (113%)</b> | <b>80 (167%)</b> | <b>84 (165%)</b> | <b>150 (140%)</b> | <b>41 (121%)</b> | <b>38 (112%)</b> | <b>41 (137%)</b> | <b>149 (113%)</b> | <b>97 (135%)</b> | <b>313 (113%)</b> | <b>116 (123%)</b> |
| Psychological counselling                                                                                                                                                            | 280 (29%)          | 18 (33%)         | 11 (34%)         | 10 (21%)         | 9 (18%)          | 87 (81%)          | 15 (44%)         | 5 (15%)          | 6 (20%)          | 46 (35%)          | 29 (40%)         | 26 (9%)           | 18 (19%)          |
| Self-help groups                                                                                                                                                                     | 30 (3%)            | 2 (4%)           | 0 (0%)           | 4 (8%)           | 3 (6%)           | 3 (3%)            | 2 (6%)           | 1 (3%)           | 1 (3%)           | 4 (3%)            | 1 (1%)           | 7 (3%)            | 2 (2%)            |
| Parent groups                                                                                                                                                                        | 133 (14%)          | 18 (33%)         | 2 (6%)           | 15 (31%)         | 26 (51%)         | 8 (7%)            | 3 (9%)           | 2 (6%)           | 5 (17%)          | 12 (9%)           | 5 (7%)           | 17 (6%)           | 20 (21%)          |
| Peer-to-peer support                                                                                                                                                                 | 101 (10%)          | 4 (7%)           | 0 (0%)           | 9 (19%)          | 23 (45%)         | 0 (0%)            | 2 (6%)           | 2 (6%)           | 3 (10%)          | 11 (8%)           | 1 (1%)           | 30 (11%)          | 16 (17%)          |
| Social worker                                                                                                                                                                        | 182 (19%)          | 42 (76%)         | 2 (6%)           | 27 (56%)         | 7 (14%)          | 33 (31%)          | 1 (3%)           | 5 (15%)          | 16 (53%)         | 0 (0%)            | 44 (61%)         | 4 (1%)            | 1 (1%)            |
| None                                                                                                                                                                                 | 462 (48%)          | 9 (16%)          | 21 (66%)         | 11 (23%)         | 9 (18%)          | 13 (12%)          | 17 (50%)         | 21 (62%)         | 8 (27%)          | 72 (55%)          | 11 (15%)         | 213 (77%)         | 57 (61%)          |
| Don't know                                                                                                                                                                           | 33 (3%)            | 1 (2%)           | 0 (0%)           | 1 (2%)           | 6 (12%)          | 2 (2%)            | 0 (0%)           | 2 (6%)           | 1 (3%)           | 3 (2%)            | 2 (3%)           | 14 (5%)           | 1 (1%)            |
| Other                                                                                                                                                                                | 18 (2%)            | 0 (0%)           | 0 (0%)           | 3 (6%)           | 1 (2%)           | 4 (4%)            | 1 (3%)           | 0 (0%)           | 1 (3%)           | 1 (1%)            | 4 (6%)           | 2 (1%)            | 1 (1%)            |



## Impact of Coronavirus/COVID-19 on special/intensive care for newborns – a parents' perspective

The Coronavirus/COVID-19 pandemic creates exceptional challenges, especially for the care of the most vulnerable groups of patients – such as sick and preterm born children. With this survey, we aim to explore parents' experiences related to these challenges as they play a crucial role in the care of their babies – not only at home but also in the hospital setting.

We therefore kindly ask you as parents of sick and preterm infants who were born during this Coronavirus/COVID-19 pandemic to participate in this survey. Please be aware that some of the questions might cause distressing reactions considering your personal situation and experience. You may of course stop your participation at any time. Completing the survey will take approx. 15 minutes.

**Ethics and data use:** EFCNI handles your data lawfully and confidentially, in accordance with the General Data Protection Regulation (GDPR). No person-related data will be stored or published. Your data will be evaluated anonymously, it will not be stored or passed on to third parties and will not be used for any other purpose than the one mentioned above. SurveyMonkey, the tool used for this survey, grants compliance with the GDPR and the Privacy Shield. In accordance with the GDPR, you have the right to information, the right to delete your data and can withdraw this declaration of consent at any time. The Ethics Committee of Maastricht UMC+ officially waived the need for ethics approval.

This survey is carried out by the Scientific Affairs Department of the European Foundation for the Care of Newborn Infants (EFCNI) ([www.efcni.org](http://www.efcni.org)) in collaboration with representatives of parent organisations, COINN (Council of International Neonatal Nurses), ESPR (European Society for Paediatric Research), NIDCAP (Newborn Individualized Developmental Care and Assessment Program), and UENPS (Union of European Neonatal & Perinatal Societies).

If you have any questions, comments or concerns regarding the study please contact: [research@efcni.org](mailto:research@efcni.org)

**Thank you for your participation and support!**

**European Foundation for the Care of Newborn Infants (EFCNI)  
and Global Alliance for Newborn Care (GLANCE)**

\* 1. I confirm to have read and understood the information provided above and consent to the use of my de-identified data.

Agree and continue

Do not agree and end survey

## Impact of Coronavirus/COVID-19 on special/intensive care for newborns – a parents' perspective

### Background information

\* 2. How are you related to the newborn baby?

- Mother
- Father
- Other
- Other parent (please specify)

\* 3. Was your baby born on 1st of Dec 2019 or after?

- Yes
- No

\* 4. Did your baby receive special/intensive care after birth (exceeding regular care for healthy babies, e.g. oxygen therapy, incubator, intravenous infusions)?

- Yes
- No

5. Which country do you currently live in?

6. What is your age?

- Younger than 20
- Between 20 and 24
- Between 25 and 29
- Between 30 and 34
- Between 35 and 39
- Between 40 and 44
- Older than 44

## Impact of Coronavirus/COVID-19 on special/intensive care for newborns – a parents' perspective

### 7. When was your baby born?

Date

Date

### 8. What week of pregnancy was your baby born at (gestational age)?

### 9. Was this a multiple pregnancy?

- Yes (Please note: when answering the following questions refer to the first-born baby of the pregnancy)
- No

### 10. How was your baby born?

- Vaginal birth
- C-section
- Both (e.g. in case of multiple pregnancy)

### 11. What was the birth weight of your baby?

- Under 1000 g (2,2 lbs)
- Between 1000 g (2,2 lbs) and 1500 g (3,3 lbs)
- More than 1500 g (3,3 lbs) and up to 2500 g (5,5 lbs)
- More than 2500 g (5,5 lbs)
- Don't know the birth weight

### 12. Does your baby still receive special/intensive care today?

- Yes
- No

1 13. How long did your baby receive special/intensive care (or until today if your baby is still receiving it)?  
2  
3

4  Under 1 week  
5

6  Between 1 to 3 weeks  
7

8  More than 3 and up to 5 weeks  
9

10  More than 5 weeks  
11  
12  
13  
14  
15  
16  
17  
18  
19  
20  
21  
22  
23  
24  
25  
26  
27  
28  
29  
30  
31  
32  
33  
34  
35  
36  
37  
38  
39  
40  
41  
42  
43  
44  
45  
46  
47  
48  
49  
50  
51  
52  
53  
54  
55  
56  
57  
58  
59  
60

## Impact of Coronavirus/COVID-19 on special/intensive care for newborns – a parents' perspective

### Coronavirus/COVID-19

14. Different countries and regions have been addressing the threat of Coronavirus/COVID-19 in different ways. Which of the following best describes the situation in your country/region around the time of your baby's birth?

- There was no major concern about Coronavirus/COVID-19 in the country/region in which I live.
- People were advised to take precautions (e.g. hand washing) but day-to-day life continued as usual.
- Social distancing was strongly encouraged (e.g. keeping a distance, avoiding public gatherings) but no lockdowns were in place.
- Lockdown had been implemented (e.g. advised to stay home except for essential activities; schools, restaurants and non-essential businesses were closed).
- Quarantine was implemented and/or people were fined for leaving their homes without authorization.
- Other (please elaborate):

15. Have you tested positive for Coronavirus/COVID-19?

- Yes
- No
- No, but suspected case (based on symptoms)

16. Has your partner tested positive for Coronavirus/COVID-19?

- Yes
- No
- No, but suspected case (based on symptoms)
- Don't know

17. Has your baby tested positive for Coronavirus/COVID-19?

- Yes
- No
- Don't know

1 18. Did you have contact with a person who tested positive for Coronavirus/COVID-19 during the 2 weeks  
2 prior to your baby's birth?

- 3  
4  Yes  
5  
6  No  
7  
8  No, but suspected case (based on symptoms)  
9  
10  Don't know  
11  
12  
13  
14  
15  
16  
17  
18  
19  
20  
21  
22  
23  
24  
25  
26  
27  
28  
29  
30  
31  
32  
33  
34  
35  
36  
37  
38  
39  
40  
41  
42  
43  
44  
45  
46  
47  
48  
49  
50  
51  
52  
53  
54  
55  
56  
57  
58  
59  
60



## Impact of Coronavirus/COVID-19 on special/intensive care for newborns – a parents' perspective

### Before and after birth

19. How was the timing of pregnancy-related appointments affected, if at all, by Coronavirus/Covid-19?

- It was done as usual.
- No appointments took place.
- Fewer appointments took place.
- Other (please explain):

20. Was another person permitted to accompany you to pregnancy-related appointments during the Coronavirus/COVID-19 phase?

- Yes
- Not to all appointments
- No, never
- Don't know
- Not applicable (e.g. no appointments took place)

21. Were you permitted to have another person present with you during birth (e.g. partner)?

- Yes
- No

22. For how long was this person permitted to stay with you?

- Not applicable; no other person was permitted to be present
- For the entire labour
- For a part of it (please elaborate):

1  
2  
3  
4  
5  
6  
7  
8  
9  
10  
11  
12  
13  
14  
15  
16  
17  
18  
19  
20  
21  
22  
23  
24  
25  
26  
27  
28  
29  
30  
31  
32  
33  
34  
35  
36  
37  
38  
39  
40  
41  
42  
43  
44  
45  
46  
47  
48  
49  
50  
51  
52  
53  
54  
55  
56  
57  
58  
59  
60

23. When was skin-to-skin contact with your baby and one of the parents initiated (e.g. holding the baby on the chest, kangaroo mother care)?

- Immediately after birth
- On the first day
- After the first day but during the first week
- After the first week
- Not so far (If you are still in the hospital with your baby)
- Not during the time in the hospital (if you are already at home with your baby)

24. How often were you permitted to have skin-to-skin contact (kangaroo mother care) with your baby?

- As often as I wanted
- At least once per day
- At least once per week
- Less than once per week
- Not so far

25. Were you permitted to touch your baby in the incubator or bed?

- Yes
- No

26. How often were you permitted to touch your baby in the incubator or bed?

- As often as I wanted
- At least once per day
- At least once per week
- Less than once per week
- Not so far

## Impact of Coronavirus/COVID-19 on special/intensive care for newborns – a parents' perspective

### Breastfeeding/nutrition

27. Was initiation of breastfeeding encouraged by medical/nursing staff?

- Yes, highly encouraged
- Yes, somewhat encouraged
- No, not encouraged at all
- Don't know

28. Was your baby breastfed or provided with mother's own pumped/expressed breastmilk in the first weeks after birth?

- Yes, exclusively
- Yes, partly
- No, not at all
- Don't know

29. When did the initiation of breastfeeding or provision of mother's own pumped/expressed breastmilk take place?

- Not applicable; baby was not breastfed
- On the first day
- After the first day but during the first week
- After the first week
- Don't know

30. Were you allowed to bring expressed milk from home to the unit?

- Not applicable; baby was not breastfed
- Yes
- No, the milk had to be expressed at the hospital
- No, other

31. How was your baby fed? (*multiple answers possible*)

- With breastmilk (breastfeeding or pumped milk)
- With donor milk
- With formula milk
- Don't know

## Impact of Coronavirus/COVID-19 on special/intensive care for newborns – a parents' perspective

### Presence with the baby receiving special/intensive care

32. Do you know if the Coronavirus/COVID-19 situation affected the facility policy around your ability to be present with the baby receiving special/intensive care?

- There were no changes
- Restrictions were implemented
- I don't know if there were changes

33. Who was allowed to be present with your baby receiving special/intensive care? (*multiple answers possible*)

- Mother
- Father/partner
- Sibling/s
- Other family members
- Friends
- No one
- I don't know

34. Could more than one person be present with the baby at the same time?

- No
- Don't know
- Yes, both parents
- Yes, other (please explain):

35. How often were you allowed to see your baby receiving special/intensive care?

- All the time, (24/7)
- Multiple times per day
- Once per day
- Multiple times per week
- Once per week
- Less than once per week
- Never

1 36. How long were you allowed to see your baby per visit?  
2  
3

- 4  Up to 15 minutes  
5  More than 15 minutes, up to one hour  
6  More than one hour, up to three hours  
7  More than three hours, but not unlimited  
8  Unlimited  
9  Not at all  
10  
11  
12  
13

14 37. Were sleeping facilities provided so you could stay with the baby (24/7)?  
15

- 16  Yes, sleeping facilities were provided next to my baby in the unit  
17  Yes, sleeping facilities were provided outside the unit (e.g. in an apartment house nearby, in another unit)  
18  No, sleeping facilities were not provided  
19  
20  
21  
22

23 38. Which alternatives to being present were provided with your baby receiving special/intensive care?  
24 *(multiple answers possible)*  
25

- 26  Photos  
27  Livestream  
28  Recorded video  
29  Video calls  
30  None  
31  Other, please specify:  
32  
33  
34  
35

36   
37  
38  
39

40 39. Do you feel that the measures that were implemented due to Coronavirus/COVID-19 (e.g. restrictions  
41 by hospital management) made it more difficult for you to be **present** with your baby?  
42

- 43  Yes, much more difficult  
44  Yes, somewhat more difficult  
45  No, not more difficult  
46  No, there were no restrictive measures in place  
47  Don't know  
48  
49  
50  
51  
52  
53  
54  
55  
56  
57  
58  
59  
60

1  
2  
3  
4  
5  
6  
7  
8  
9  
10  
11  
12  
13  
14  
15  
16  
17  
18  
19  
20  
21  
22  
23  
24  
25  
26  
27  
28  
29  
30  
31  
32  
33  
34  
35  
36  
37  
38  
39  
40  
41  
42  
43  
44  
45  
46  
47  
48  
49  
50  
51  
52  
53  
54  
55  
56  
57  
58  
59  
60

40. Do you feel that the measures that were implemented due to Coronavirus/COVID-19 (e.g. restrictions by hospital management) made it more difficult for you to be **interactive** with your baby (e.g. skin-to-skin contact or being involved in the care of your baby)?

- Yes, much more difficult
- Yes, somewhat more difficult
- No, not more difficult
- No, there were no restrictive measures in place
- Don't know

41. Did medical/nursing staff involve you in the care of your baby (e.g. nappy changing, feeding, temperature taking)?

- Yes, to a high degree
- Yes, to some degree
- No, not at all
- Don't know

42. Did medical/nursing staff involve your partner in the care of your baby?

- Yes, to a high degree
- Yes, to some degree
- No, not at all
- Don't know
- I don't have a partner



## Impact of Coronavirus/COVID-19 on special/intensive care for newborns – a parents' perspective

### Communication

43. Do you feel you received or are receiving adequate general health information about your baby during the hospital stay?

- Yes, to a high degree
- Yes, to some degree
- No, not at all
- Don't know
- I didn't receive any information

44. How did you receive health information about your baby during the time your baby received or is receiving special/intensive care? (*multiple answers possible*)

- Meetings with medical/nursing staff (face to face)
- Meetings with medical/nursing staff (video conference)
- Phone calls
- E-Mails
- Letters
- Information material (e.g. brochure, website)
- I didn't receive information
- Other, please specify:

45. How often did you receive information about your baby during the time your baby received or is receiving special/intensive care?

- Multiple times per day
- Once per day
- Multiple times per week
- Once per week
- Less than once per week
- Never
- Don't know

1  
2  
3  
4  
5  
6  
7  
8  
9  
10  
11  
12  
13  
14  
15  
16  
17  
18  
19  
20  
21  
22  
23  
24  
25  
26  
27  
28  
29  
30  
31  
32  
33  
34  
35  
36  
37  
38  
39  
40  
41  
42  
43  
44  
45  
46  
47  
48  
49  
50  
51  
52  
53  
54  
55  
56  
57  
58  
59  
60

46. Do you feel you received or are receiving adequate information about how to protect yourself and your baby from Coronavirus/COVID-19 transmission while your baby received or is receiving special/intensive care?

- Yes, to a high degree
- Yes, to some degree
- No, not at all
- Don't know
- I didn't receive any information

47. Do you feel you received adequate information about Coronavirus/COVID-19 when discharged from the hospital?

- Yes, to a high degree
- Yes, to some degree
- No, not at all
- Don't know
- I didn't receive any information
- No discharge yet

## Impact of Coronavirus/COVID-19 on special/intensive care for newborns – a parents' perspective

### Mental health and support

48. Did you worry because of the Coronavirus/COVID-19 situation during pregnancy?

- Yes, to a high degree
- Yes, to some degree
- No, not at all
- Don't know
- Coronavirus/COVID-19 was not an issue then.

49. Did/do you worry because of the Coronavirus/COVID-19 situation after the birth of your baby?

- Yes, to a high degree
- Yes, to some degree
- No, not at all
- Don't know

50. Did (or do) you struggle to be present with your baby who received or is receiving special care due to other obligations you have (e.g. for other children, family member/s)?

- Yes, to a high degree
- Yes, to some degree
- No, not at all
- Don't know

51. Do you feel you were adequately informed about mental health support (e.g. counselling, self-help/parent groups)?

- Yes, to a high degree
- Yes, to some degree
- No, not at all
- Don't know
- There was no mental health support

1 52. What kind of support was offered? (*multiple answers possible*)

2  Psychological counselling

3  Self-help groups

4  Parent groups

5  Peer-to-peer support

6  Social worker

7  None

8  Don't know

9  Other, please specify:

10  
11  
12  
13  
14  
15  
16  
17

18  
19  
20 53. Do you have anything additional to share relating to the impact of Coronavirus/COVID-19 on  
21 special/intensive care for babies?

22  
23

Impact of Coronavirus/COVID-19 on special/intensive care for newborns – a parents' perspective

Thank you very much for your interest in our study. The aim of this survey is to explore parents' experiences related to the challenges caused by the Coronavirus/COVID-19 pandemic regarding the care of sick and preterm born children receiving special/intensive care. In case you have questions or comments feel free to contact us: [research@efcni.org](mailto:research@efcni.org)

Impact of Coronavirus/COVID-19 on special/intensive care for newborns – a parents' perspective

Thank you very much for your interest and for taking part in our survey "Impact of Coronavirus/COVID-19 on special/intensive care for newborns – a parents' perspective". In case you have any questions or would like to contact us in the future, please send an email to: [research@efcni.org](mailto:research@efcni.org).

European Foundation for the Care of Newborn Infants (EFCNI): [www.efcni.org](http://www.efcni.org)

Global Alliance for Newborn Care (GLANCE): [www.glance-network.org](http://www.glance-network.org)



STROBE statement - checklist of items that should be included in reports of observational/population/cohort studies

|                              | Item No | Recommendation                                                                                                                                                                                                                                                                                                                                                                                                                                                         | Page No |
|------------------------------|---------|------------------------------------------------------------------------------------------------------------------------------------------------------------------------------------------------------------------------------------------------------------------------------------------------------------------------------------------------------------------------------------------------------------------------------------------------------------------------|---------|
| <b>Title and abstract</b>    | 1       | (a) Indicate the study's design with a commonly used term in the title or the abstract                                                                                                                                                                                                                                                                                                                                                                                 | 1-2     |
|                              |         | (b) Provide in the abstract an informative and balanced summary of what was done and what was found                                                                                                                                                                                                                                                                                                                                                                    | 2       |
| <b>Introduction</b>          |         |                                                                                                                                                                                                                                                                                                                                                                                                                                                                        |         |
| Background/rationale         | 2       | Explain the scientific background and rationale for the investigation being reported                                                                                                                                                                                                                                                                                                                                                                                   | 4       |
| Objectives                   | 3       | State specific objectives, including any prespecified hypotheses                                                                                                                                                                                                                                                                                                                                                                                                       | 4       |
| <b>Methods</b>               |         |                                                                                                                                                                                                                                                                                                                                                                                                                                                                        |         |
| Study design                 | 4       | Present key elements of study design early in the paper                                                                                                                                                                                                                                                                                                                                                                                                                | 4       |
| Setting                      | 5       | Describe the setting, locations, and relevant dates, including periods of recruitment, exposure, follow-up, and data collection                                                                                                                                                                                                                                                                                                                                        | 4-5     |
| Participants                 | 6       | (a) <i>Cohort study</i> —Give the eligibility criteria, and the sources and methods of selection of participants. Describe methods of follow-up<br><i>Case-control study</i> —Give the eligibility criteria, and the sources and methods of case ascertainment and control selection. Give the rationale for the choice of cases and controls<br><i>Cross-sectional study</i> —Give the eligibility criteria, and the sources and methods of selection of participants | 4-5     |
|                              |         | (b) <i>Cohort study</i> —For matched studies, give matching criteria and number of exposed and unexposed<br><i>Case-control study</i> —For matched studies, give matching criteria and the number of controls per case                                                                                                                                                                                                                                                 | n/a     |
| Variables                    | 7       | Clearly define all outcomes, exposures, predictors, potential confounders, and effect modifiers. Give diagnostic criteria, if applicable                                                                                                                                                                                                                                                                                                                               | 5       |
| Data sources/<br>measurement | 8*      | For each variable of interest, give sources of data and details of methods of assessment (measurement). Describe comparability of assessment methods if there is more than one group                                                                                                                                                                                                                                                                                   | 5       |
| Bias                         | 9       | Describe any efforts to address potential sources of bias                                                                                                                                                                                                                                                                                                                                                                                                              | 5       |
| Study size                   | 10      | Explain how the study size was arrived at                                                                                                                                                                                                                                                                                                                                                                                                                              | 5       |
| Quantitative variables       | 11      | Explain how quantitative variables were handled in the analyses. If applicable, describe which groupings were chosen and why                                                                                                                                                                                                                                                                                                                                           | 5       |
| Statistical methods          | 12      | (a) Describe all statistical methods, including those used to control for confounding                                                                                                                                                                                                                                                                                                                                                                                  | 5       |
|                              |         | (b) Describe any methods used to examine subgroups and interactions                                                                                                                                                                                                                                                                                                                                                                                                    | n/a     |
|                              |         | (c) Explain how missing data were addressed                                                                                                                                                                                                                                                                                                                                                                                                                            | 5       |
|                              |         | (d) <i>Cohort study</i> —If applicable, explain how loss to follow-up was addressed<br><i>Case-control study</i> —If applicable, explain how matching of cases and controls was addressed<br><i>Cross-sectional study</i> —If applicable, describe analytical methods taking account of sampling strategy                                                                                                                                                              | 5       |
|                              |         | (e) Describe any sensitivity analyses                                                                                                                                                                                                                                                                                                                                                                                                                                  | n/a     |

| <b>Results</b>           |     |                                                                                                                                                                                                              |       |
|--------------------------|-----|--------------------------------------------------------------------------------------------------------------------------------------------------------------------------------------------------------------|-------|
| Participants             | 13* | (a) Report numbers of individuals at each stage of study—eg numbers potentially eligible, examined for eligibility, confirmed eligible, included in the study, completing follow-up, and analysed            | 6     |
|                          |     | (b) Give reasons for non-participation at each stage                                                                                                                                                         | n/a   |
|                          |     | (c) Consider use of a flow diagram                                                                                                                                                                           | n/a   |
| Descriptive data         | 14* | (a) Give characteristics of study participants (eg demographic, clinical, social) and information on exposures and potential confounders                                                                     | 6     |
|                          |     | (b) Indicate number of participants with missing data for each variable of interest                                                                                                                          | 6     |
|                          |     | (c) <i>Cohort study</i> —Summarise follow-up time (eg, average and total amount)                                                                                                                             | n/a   |
| Outcome data             | 15* | <i>Cohort study</i> —Report numbers of outcome events or summary measures over time                                                                                                                          |       |
|                          |     | <i>Case-control study</i> —Report numbers in each exposure category, or summary measures of exposure                                                                                                         |       |
|                          |     | <i>Cross-sectional study</i> —Report numbers of outcome events or summary measures                                                                                                                           | 7-12  |
| Main results             | 16  | (a) Give unadjusted estimates and, if applicable, confounder-adjusted estimates and their precision (eg, 95% confidence interval). Make clear which confounders were adjusted for and why they were included | 7-12  |
|                          |     | (b) Report category boundaries when continuous variables were categorized                                                                                                                                    | n/a   |
|                          |     | (c) If relevant, consider translating estimates of relative risk into absolute risk for a meaningful time period                                                                                             | n/a   |
| Other analyses           | 17  | Report other analyses done—eg analyses of subgroups and interactions, and sensitivity analyses                                                                                                               | 7-12  |
| <b>Discussion</b>        |     |                                                                                                                                                                                                              |       |
| Key results              | 18  | Summarise key results with reference to study objectives                                                                                                                                                     | 12-14 |
| Limitations              | 19  | Discuss limitations of the study, taking into account sources of potential bias or imprecision. Discuss both direction and magnitude of any potential bias                                                   | 14    |
| Interpretation           | 20  | Give a cautious overall interpretation of results considering objectives, limitations, multiplicity of analyses, results from similar studies, and other relevant evidence                                   | 14    |
| Generalisability         | 21  | Discuss the generalisability (external validity) of the study results                                                                                                                                        | 14    |
| <b>Other information</b> |     |                                                                                                                                                                                                              |       |
| Funding                  | 22  | Give the source of funding and the role of the funders for the present study and, if applicable, for the original study on which the present article is based                                                | 15    |

\*Give information separately for cases and controls in case-control studies and, if applicable, for exposed and unexposed groups in cohort and cross-sectional studies.

**Note:** An Explanation and Elaboration article discusses each checklist item and gives methodological background and published examples of transparent reporting. The STROBE checklist is best used in conjunction with this article (freely available on the Web sites of PLoS Medicine at <http://www.plosmedicine.org/>, Annals of Internal Medicine at <http://www.annals.org/>, and Epidemiology at <http://www.epidem.com/>). Information on the STROBE Initiative is available at [www.strobe-statement.org](http://www.strobe-statement.org).

# BMJ Open

## Parents' experiences regarding neonatal care during the COVID-19 pandemic – country-specific findings of a multi-national survey

|                                 |                                                                                                                                                                                                                                                                                                                                                                                                                                                                                                                                                                                                                                                                                                                                                                                       |
|---------------------------------|---------------------------------------------------------------------------------------------------------------------------------------------------------------------------------------------------------------------------------------------------------------------------------------------------------------------------------------------------------------------------------------------------------------------------------------------------------------------------------------------------------------------------------------------------------------------------------------------------------------------------------------------------------------------------------------------------------------------------------------------------------------------------------------|
| Journal:                        | <i>BMJ Open</i>                                                                                                                                                                                                                                                                                                                                                                                                                                                                                                                                                                                                                                                                                                                                                                       |
| Manuscript ID                   | bmjopen-2021-056856.R2                                                                                                                                                                                                                                                                                                                                                                                                                                                                                                                                                                                                                                                                                                                                                                |
| Article Type:                   | Original research                                                                                                                                                                                                                                                                                                                                                                                                                                                                                                                                                                                                                                                                                                                                                                     |
| Date Submitted by the Author:   | 16-Mar-2022                                                                                                                                                                                                                                                                                                                                                                                                                                                                                                                                                                                                                                                                                                                                                                           |
| Complete List of Authors:       | Kostenzer, Johanna; European Foundation for the Care of Newborn Infants, Scientific Affairs<br>von Rosenstiel-Pulver, Charlotte; European Foundation for the Care of Newborn Infants, Scientific Affairs<br>Hoffmann, Julia; European Foundation for the Care of Newborn Infants, Scientific Affairs<br>Walsh, Aisling; European Foundation for the Care of Newborn Infants, Scientific Affairs<br>Mader, Silke; European Foundation for the Care of Newborn Infants, Scientific Affairs<br>Zimmermann, Luc; European Foundation for the Care of Newborn Infants, Scientific Affairs; Maastricht UMC+, Department of Paediatrics, Research School Oncology and Development<br>COVID-19 Zero Separation Collaborative Group, n.a.; European Foundation for the Care of Newborn Infants |
| <b>Primary Subject Heading</b>: | Paediatrics                                                                                                                                                                                                                                                                                                                                                                                                                                                                                                                                                                                                                                                                                                                                                                           |
| Secondary Subject Heading:      | Global health, Health policy, Intensive care, Paediatrics, Patient-centred medicine                                                                                                                                                                                                                                                                                                                                                                                                                                                                                                                                                                                                                                                                                                   |
| Keywords:                       | COVID-19, Public health < INFECTIOUS DISEASES, Neonatal intensive & critical care < INTENSIVE & CRITICAL CARE, NEONATOLOGY, PUBLIC HEALTH, Health policy < HEALTH SERVICES ADMINISTRATION & MANAGEMENT                                                                                                                                                                                                                                                                                                                                                                                                                                                                                                                                                                                |
|                                 |                                                                                                                                                                                                                                                                                                                                                                                                                                                                                                                                                                                                                                                                                                                                                                                       |

SCHOLARONE™  
Manuscripts



I, the Submitting Author has the right to grant and does grant on behalf of all authors of the Work (as defined in the below author licence), an exclusive licence and/or a non-exclusive licence for contributions from authors who are: i) UK Crown employees; ii) where BMJ has agreed a CC-BY licence shall apply, and/or iii) in accordance with the terms applicable for US Federal Government officers or employees acting as part of their official duties; on a worldwide, perpetual, irrevocable, royalty-free basis to BMJ Publishing Group Ltd ("BMJ") its licensees and where the relevant Journal is co-owned by BMJ to the co-owners of the Journal, to publish the Work in this journal and any other BMJ products and to exploit all rights, as set out in our [licence](#).

The Submitting Author accepts and understands that any supply made under these terms is made by BMJ to the Submitting Author unless you are acting as an employee on behalf of your employer or a postgraduate student of an affiliated institution which is paying any applicable article publishing charge ("APC") for Open Access articles. Where the Submitting Author wishes to make the Work available on an Open Access basis (and intends to pay the relevant APC), the terms of reuse of such Open Access shall be governed by a Creative Commons licence – details of these licences and which [Creative Commons](#) licence will apply to this Work are set out in our licence referred to above.

Other than as permitted in any relevant BMJ Author's Self Archiving Policies, I confirm this Work has not been accepted for publication elsewhere, is not being considered for publication elsewhere and does not duplicate material already published. I confirm all authors consent to publication of this Work and authorise the granting of this licence.

1  
2  
3 1 *Parents' experiences regarding neonatal care during the COVID-19 pandemic*  
4 2 *– country-specific findings of a multi-national survey*  
5 3  
6 4  
7 5  
8 6  
9 7

10 7 **Authors:**  
11 8

12 9 Johanna Kostenzer<sup>1</sup>, Charlotte von Rosenstiel-Pulver<sup>1</sup>, Julia Hoffmann<sup>1</sup>, Aisling Walsh<sup>1</sup>, Silke Mader<sup>1\*</sup>,  
13 10 Luc J.I. Zimmermann<sup>1,2</sup>, on behalf of the COVID-19 Zero Separation Collaborative Group  
14 11

15 12 <sup>1</sup>European Foundation for the Care of Newborn Infants (EFCNI), Scientific Affairs, Hofmannstrasse  
16 13 7A, D-81379 München, Germany  
17 14

18 15 <sup>2</sup>Department of Paediatrics, Research School Oncology and Development, Maastricht UMC+,  
19 16 Maastricht, The Netherlands  
20 17  
21 18  
22 19

23 20 \*Corresponding author: Silke Mader, European Foundation for the Care of Newborn Infants (EFCNI),  
24 21 Hofmannstraße 7A, 81379 Munich, Germany, [S.MaderOffice@efeni.org](mailto:S.MaderOffice@efeni.org)  
25 22  
26 23  
27 24  
28 25

29 25 Word count: 5529  
30 26  
31  
32  
33  
34  
35  
36  
37  
38  
39  
40  
41  
42  
43  
44  
45  
46  
47  
48  
49  
50  
51  
52  
53  
54  
55  
56  
57  
58  
59  
60

## ABSTRACT

### Objectives

The COVID-19 pandemic has disrupted healthcare systems, challenging neonatal care provision globally. Curtailed visitation policies are known to negatively affect the medical and emotional care of sick, preterm, and low birthweight infants, compromising the achievement of the 2030 Development Agenda. Focusing on infant and family-centred developmental care (IFCDC), we explored parents' experiences of the disruptions affecting newborns in need of special or intensive care during the first year of the pandemic.

### Design

Cross-sectional study using an electronic, web-based questionnaire.

### Setting

Multi-country online-survey.

### Methods

Data were collected between August and November 2020 using a pre-tested online, multi-lingual questionnaire. The target group consisted of parents of preterm, sick or low birthweight infants born during the first year of the COVID-19 pandemic and who received special/intensive care. The analysis followed a descriptive quantitative approach.

### Results

In total, 1148 participants from 12 countries (Australia, Brazil, Canada, China, France, Italy, Mexico, New Zealand, Poland, Sweden, Turkey, Ukraine) were eligible for analysis. We identified significant country-specific differences, showing that the application of IFCDC is less prone to disruptions in some countries than in others. For example, parental presence was affected: 27% of the total respondents indicated that no-one was allowed to be present with the infant receiving special/intensive care. In Australia, Canada, France, New Zealand and Sweden, both the mother and the father (in more than 90% of cases) was allowed access to the newborn, whereas participants indicated that no-one was allowed to be present in China (52%), Poland (39%), Turkey (49%), and Ukraine (32%).

### Conclusions

The application of IFCDC during the COVID-19 pandemic differs between countries. There is an urgent need to reconsider separation policies and to strengthen the infant and family-centred developmental care approach worldwide to ensure the 2030 Development Agenda is achieved.

### Strengths and limitations of this study

- With this survey, 1148 parents were asked about their experiences of the disruptions affecting newborns in need of special or intensive care during the first year of the pandemic.
- Data were collected in 12 countries via a pre-tested online survey with 52 questions.
- In a cross-country approach, differences in providing infant- and family-centred developmental care were analysed between countries.
- The pandemic situation, geographical, climatic and environmental aspects, and containment strategies were considered in between-country analyses.
- The online format of the study bears the risk of selection bias, and response rates could not be calculated.

For peer review only

## INTRODUCTION

During the last decades, major achievements have been made in the field of maternal and newborn health, particularly in light of the United Nations Sustainable Development Goals [1]. While efforts have resulted in a reduction of maternal and neonatal deaths and better health outcomes for newborns worldwide, progress in particular affecting preterm, sick, and low birthweight infants has been slow [1,2]. Pandemic-related shortages in maternal and newborn care provision have severe consequences for vulnerable infants and their families [3–5], continuing to threaten the achievement of the 2030 Development Agenda [6].

Worldwide, one in ten infants is born preterm every year, with increasing rates in almost all countries where reliable epidemiologic datasets are available, making it a truly global problem [7]. Preterm birth is the leading cause of death under five years of age, and together with birth complications, it is the leading cause of neonatal death [6,8,9]. The extremely fragile group of patients requires highly specialised care, which is labour and cost intense, and thus, stark regional discrepancies in the availability of specialised care are well described [10]. However, whilst international agreements, like the United Nations Convention on the Rights of the Child or the European Association for Children in Hospital (EACH), foster the right of children to be close to their parents [11,12], these rights have not yet been implemented in the majority of neonatal units across the globe where parents and their newborns have often been separated – already in pre-pandemic times – yet increasingly as a response to the ongoing global health crisis [13–15]. Before the COVID-19 pandemic hit the globe, an increasing number of neonatal units worldwide had adopted the principles of infant- and family-centred developmental care (IFCDC), such as unrestricted parental access, active parental participation and involvement and Kangaroo Mother Care (KMC) [16,17]. However, IFCDC is so far still a new concept and its implementation remains to be one of the biggest challenges in neonatal care as it also requires a fundamental change in the mentality of neonatal caregivers [16–20].

The COVID-19 pandemic and related restrictions have resulted in severe limitations in neonatal care provision [18], especially regarding acknowledged elements of IFCDC [15,21–27]. The frequently implemented separation of parents and their newborns has negative implications for the health outcomes of newborns [28–30], interfering with acknowledged practices such as KMC, skin-to-skin contact [31], and breastfeeding [32]. The reduction of parental presence in the neonatal intensive care units (NICU) has led to increased stress and mental health problems among parents and families, raising the risk of postnatal depression and posttraumatic stress syndrome, and limited opportunities for parent-infant bonding [14,15], while staff shortages and the lack of available guidelines have led to high levels of stress and anxiety among health professionals [21,33]. Few studies and reports have provided insights into parents' experiences regarding some of the implemented restrictions [14,15,34]. However, a comparative and holistic approach, emphasising the cornerstones of IFCDC, has been missing so far, which is the focus of this research.

With this study, we explored parents' experiences of disruptions to neonatal care during the first year of the COVID-19 pandemic across the globe, focusing on individual country actions. We aimed to document the challenges experienced by parents, spanning wide variations across countries and regions. The analysis and corresponding findings shall provide an incentive for policy makers, public health experts, and healthcare professionals alike to learn from the different approaches and subsequent implications of the outcomes of single countries and underline the importance of parents' involvement in the care of vulnerable newborns. It is imperative that this occurs, irrespective of the ongoing pandemic or future emergency situations.

## METHODS

### Study design and population

We conducted a cross-sectional study using an electronic, web-based questionnaire with the aim to explore parents' experiences during the first year of the COVID-19 pandemic with regard to the core



1  
2  
3 132 elements of IFCDC. Eligible for participation were parents of preterm, sick or low birthweight infants  
4 133 born during the first year of the COVID-19 pandemic (as of December 1, 2019) and who were receiving  
5 134 special or intensive care (inclusion criteria). The term "parent" was broadly defined, encompassing  
6 135 biological and/or social parents, allowing for self-definition as "mother," "father," or "other parent." We  
7 136 conducted and reported the study according to the Checklist for Reporting Results of Internet E-Surveys  
8 137 (CHERRIES) [35].  
9 138

10 139 Participants were recruited by the European Foundation for the Care of Newborn Infants (EFCNI), and  
11 140 its initiative, the Global Alliance for Newborn Care (GLANCE), through social media activities,  
12 141 newsletters, website outreach, and mailings. In addition, national parent organisations and the  
13 142 collaborating professional healthcare associations and their members, namely the Council of  
14 143 International Neonatal Nurses (COINN), the European Society for Paediatric Research (ESPR), the  
15 144 Neonatal Individualised Developmental Care and Assessment Project (NIDCAP), and the Union of  
16 145 European Neonatal and Perinatal Societies (UENPS), supported the dissemination of the survey link by  
17 146 promoting the study across their networks. Participation was voluntary, data collection occurred  
18 147 anonymously.  
19 148

### 20 149 **Questionnaire development and pre-testing**

21 150  
22 151 Researchers of the EFCNI scientific department developed the questionnaire in collaboration with the  
23 152 members of the COVID-19 Zero Separation Collaborative Group – an interdisciplinary stakeholder  
24 153 group including medical experts and parent/patient representatives. The survey was pre-tested among  
25 154 n=8 parents who met the target group criteria who did not request any changes of the questionnaire.  
26 155

27 156 The questionnaire consisted of 52 questions with pre-defined answers and single or multiple response  
28 157 answer options (Supplementary Material S9). It encompassed information about the respondent and  
29 158 infant, and COVID-19-related topics as well as categories of IFCDC [25], including the following  
30 159 elements: (1) background information, (2) COVID-19 testing and measures in the respective  
31 160 country/region (3) access to perinatal care, (4) presence with the newborn receiving special/intensive  
32 161 care, (5) breastfeeding/infant nutrition, (6) health communication, and (7) mental health and support.  
33 162 Parent representatives from EFCNI's international parent network supported the translations of the final  
34 163 version into 23 languages, which were all reviewed and approved by native medical professionals.  
35 164

### 36 165 **Data collection and statistical analysis**

37 166  
38 167 Data were collected between August and November 2020 using the SurveyMonkey® online survey tool.  
39 168 The analysis included answers from all respondents who met the inclusion criteria, regardless of whether  
40 169 they completed the survey to the end. The subsequent analysis was performed as sub-analysis based on  
41 170 a global survey with available data from 56 countries as previously described elsewhere [18]. For this  
42 171 sub-analysis, countries having a minimum of at least 30 answers per country were considered eligible  
43 172 for inclusion. A subsequent country selection depending on pre-defined criteria, such as sample size,  
44 173 geographical variation (continent, north/south), and COVID-19 situation [36,37] was conducted by the  
45 174 five main authors of this study using a consensus approach with ranking and voting. Recently published  
46 175 scientific articles on different countries' COVID-19-related preparedness, responses and implemented  
47 176 restrictions [38–42] acted as a basis for a comprehensive and diverse country selection resulting in the  
48 177 following included countries: Australia, Brazil, Canada, China, France, Italy, Mexico, New Zealand,  
49 178 Poland, Sweden, Turkey, and Ukraine.  
50 179

51 180 Data analysis was conducted using an exploratory approach with descriptive statistics (number of  
52 181 answers and proportion (n (%)). Multiple-answer questions were analysed as the sum of the number of  
53 182 responses per answer choice (n (%)) and may exceed 100%. A 95% CI was calculated (CI for  
54 183 proportions) for questions related to presence with the newborn and skin-to-skin care using one answer  
55 184 option in order to determine statistically significant deviations between countries and the overall total.  
56 185 A colour-coding indicated countries whose 95% CI did not overlap and was significantly different from  
57 186 the proportion of all countries (country higher (blue) or country lower (green)). All analyses presented

1  
2  
3 187 herein were carried out using SPSS software (IBM SPSS Statistics for Windows, version 27-0, IBM  
4 188 Corp, Armonk, New York) and Microsoft Excel (version 16).

5 189  
6 190 **Ethical considerations**

7 191  
8 192 Data collection, processing and storage conformed to the General Data Protection Regulation and the  
9 193 Declaration of Helsinki. Informed consent was given by ticking a confirmation box. For those who  
10 194 declined to participate, the web-interface was terminated. Respondents were informed that some of the  
11 195 questions might cause distressing reactions in view of their personal experiences, and they had the  
12 196 opportunity to stop participation at any time. No financial or other incentives were offered to the  
13 197 participants. The Ethics Committee of Maastricht UMC+, the Netherlands, has waived the need for  
14 198 ethical approval for this study (MECT 2020-1336).

15 199  
16 200  
17 201 **Patient and public involvement**

18 202 EFCNI, as a pan-European network of parent organisations, was the initiator of this research project and  
19 203 responsible for all phases of the study. In addition, representatives from national parent organisations  
20 204 worldwide were involved in the review of the questionnaire and in manuscript writing (as part of the  
21 205 COVID-19 Zero Separation Collaborative Group). Additionally, they supported the translation and  
22 206 dissemination of the survey in their network, and will again be involved in the dissemination of the  
23 207 results.

24 208  
25 209  
26 210 **RESULTS**

27 211  
28 212 **Background, baseline and COVID-19 related characteristics**

29 213  
30 214 In total, 1148 participants from Australia, Brazil, Canada, China, France, Italy, Mexico, New Zealand,  
31 215 Poland, Sweden, Turkey and Ukraine were eligible for analysis (Figure 1A). Baseline characteristics of  
32 216 participants are shown in Table 1. Nearly all answers were obtained from mothers of the infant (n=1093;  
33 217 95%) and the majority of participants was between 30 and 39 years old (53%). Most infants were born  
34 218 very preterm (28–<32 weeks of gestation; 35%) or moderate to late preterm infants (32–<37 weeks of  
35 219 gestation; 37%), and were born through caesarean section (72%). Almost 50% of the infants required  
36 220 special/intensive care for over five weeks at the time of answering the questionnaire (Table 1). Baseline  
37 221 characteristics of participants per country are pre-specified in Supplementary Table S1 and partly  
38 222 differed on country-level.

39 223  
40 224 Overall, 41% of the respondents faced lockdown measures in their country/region at the time of birth,  
41 225 30% were encouraged to adhere to social distancing and 13% were located in countries/regions where  
42 226 precautions were advised or quarantine was implemented (11%, Table 1). In total, 2% of the respondents  
43 227 and 2% of the respondents' partners had tested positive for COVID-19, with the highest numbers in  
44 228 Mexico (12% for both options). Overall, five newborns tested positive for COVID-19 (Table 1).

45 229  
46 230 Supplementary Table S2 provides an overview on each countries' demographics, including GDP per  
47 231 capita, the preterm birth rate, female educational attainment, maternal and under-5 mortality, sanitation,  
48 232 COVID-19 cases as of 29 November 2020 and the average government response stringency index based  
49 233 on the Oxford COVID-19 Government Response Tracker (OxCGRT) [43] between August and  
50 234 November 2020. Overall, Turkey (12%) and Brazil (11%) have the highest observed preterm birth rate,  
51 235 while it is lowest in Sweden (6%) [9]. Data from the World Bank [44] and the UN Inter-agency Group  
52 236 for Child Mortality Estimation [45] from 2019 shows that Brazil also has the highest rate of maternal  
53 237 mortality per 100,000 live births (60) and the highest under-5 mortality rate per 1,000 live births,  
54 238 together with Mexico (14). As of 29 November 2020, cumulative COVID-19 cases per 1 million  
55 239 population were highest in France (33,242), followed by Brazil (29,349). Cases were lowest in China  
56 240 (63) and New Zealand (352). The average government response stringency index [43] was highest in  
57 241 China (80) and lowest in New Zealand (22).

58 242

243 Table 1. Baseline and COVID-19 characteristics of participants

|                                                                                | Total           |
|--------------------------------------------------------------------------------|-----------------|
| <b>Age of respondent (years)</b>                                               | <b>n = 1146</b> |
| <20                                                                            | 5 (0%)          |
| 20–29                                                                          | 468 (41%)       |
| 30–39                                                                          | 608 (53%)       |
| >40                                                                            | 65 (6%)         |
| <b>Gestational age at birth (weeks)</b>                                        | <b>n = 1107</b> |
| Early preterm: <28                                                             | 270 (24%)       |
| Very preterm: 28–<32                                                           | 389 (35%)       |
| Moderate to late preterm: 32–<37                                               | 412 (37%)       |
| Term: 37–42                                                                    | 36 (3%)         |
| <b>Multiple pregnancy</b>                                                      | <b>n = 1112</b> |
| Yes                                                                            | 180 (16%)       |
| No                                                                             | 932 (84%)       |
| <b>Birth mode</b>                                                              | <b>n = 1111</b> |
| Vaginal birth                                                                  | 301 (27%)       |
| C-section                                                                      | 804 (72%)       |
| Both (e.g. in case of multiple pregnancy)                                      | 6 (1%)          |
| <b>Birth weight of the baby (grams)</b>                                        | <b>n = 1110</b> |
| <1000                                                                          | 290 (26%)       |
| 1000–1500                                                                      | 373 (34%)       |
| >1500–2500                                                                     | 374 (34%)       |
| >2500                                                                          | 71 (6%)         |
| Don't know the birth weight                                                    | 2 (0%)          |
| <b>Duration of special/intensive care (weeks) (at time of data collection)</b> | <b>n = 1112</b> |
| <1                                                                             | 81 (7%)         |
| 1–3                                                                            | 251 (23%)       |
| >3–5                                                                           | 277 (25%)       |
| >5                                                                             | 503 (45%)       |
| <b>COVID-19 situation in country/region at time of baby's birth</b>            | <b>n = 1071</b> |
| No major concern                                                               | 49 (5%)         |
| Precautions                                                                    | 137 (13%)       |
| Social distancing                                                              | 325 (30%)       |
| Lockdown                                                                       | 438 (41%)       |
| Quarantine                                                                     | 122 (11%)       |
| <b>Have you tested positive for Coronavirus/COVID-19?</b>                      | <b>n = 1084</b> |
| Yes                                                                            | 27 (2%)         |
| No                                                                             | 1057 (98%)      |
| <b>Has your partner tested positive for Coronavirus/COVID-19?</b>              | <b>n = 1086</b> |
| Yes                                                                            | 25 (2%)         |
| No                                                                             | 1039 (96%)      |
| Don't know                                                                     | 22 (2%)         |
| <b>Has your baby tested positive for Coronavirus/COVID-19?</b>                 | <b>n = 1087</b> |
| Yes                                                                            | 5 (0%)          |
| No                                                                             | 1035 (95%)      |
| Don't know                                                                     | 47 (4%)         |

## 244 245 246 Prenatal care and birth

247  
248 Significant variations regarding the presence of support persons during pregnancy-related appointments  
249 and birth could be observed (Figure 1B and Figure 1C). In total, 41% of all participants were not allowed  
250 to have a companion present during pregnancy-related appointments. This number was highest in  
251 Sweden and Poland (>60%) and lowest in Australia (20%). During birth, 57% of the respondents were  
252 not permitted to have another person present (Figure 1C). In Mexico, 87% of the women gave birth  
253 without a supporting companion. In Poland, this applied to 90% of the respondents. In Australia, New  
254 Zealand and Sweden >90% of the women were permitted to have another person present, and in  
255 Australia 90% of the accompanying persons could stay for the entire labour (Supplementary Table S3).  
256 Likewise, in Brazil, China and New Zealand >85% of the accompanying persons could stay during the  
257 entire labour (Supplementary Table S3).

258  
259 [Figure 1 here]

## 260 261 262 Presence with the newborn and skin-to-skin care

1  
2  
3 264 In total, 82% of the participants responded that the COVID-19 pandemic affected the facility policy  
4 265 around their ability to be present with the newborn receiving special/intensive care (Table 2). Parental  
5 266 presence was one of the areas affected most, with 27% percent of the total respondents indicating that  
6 267 no-one was allowed to be present with the newborn, with highest numbers in China (52%) and Turkey  
7 268 (49%).

8 269  
9 270 Analysis showed country-specific differences regarding access of family members to the hospitalised  
10 271 infant: Between 80% and more than 90% of participants from Australia, Canada, France, New Zealand  
11 272 and Sweden answered that both parents were allowed access. Lower proportions were observed for the  
12 273 remaining countries, with the lowest numbers in China where 35% of the mothers and 29% of the fathers  
13 274 were permitted to be present with the newborn (Table 2). More than half of the participants in Australia,  
14 275 China, France, New Zealand, and Sweden indicated that more than one person was allowed to be present  
15 276 with the newborn at the same time (Table 2).

16 277  
17 278 Overall, 32% of the respondents could see their newborn all the time (24/7), and 13% multiple times per  
18 279 day (Figure 1A). More than 20% were not allowed to see their newborn at any time, which was  
19 280 particularly observed in China (85%) and also reported by respondents from Mexico (14%), Poland  
20 281 (28%), Turkey (36%) and Ukraine (15%, Figure 1A). While more than half of the respondents from  
21 282 Poland were provided with either photos, livestream options or recorded videos as alternative tools to  
22 283 being present, parents from Mexico (78%), Turkey (55%) and Ukraine (81%) were mostly not offered  
23 284 any alternatives (Supplementary Table S4).

24 285  
25 286 While in Australia, Canada, France, New Zealand and Sweden more than 80% of the respondents had  
26 287 unlimited access to their newborn, other countries implemented duration restrictions (Table 2).  
27 288 Significantly high proportions of being “not at all” allowed to be present with the infant were noted in  
28 289 China (87%) and Turkey (34%) (Supplementary Table S5). In Mexico, Turkey and Ukraine more than  
29 290 half of the respondents indicated that they were allowed to see their baby for up to one hour. More than  
30 291 70% of the respondents from Canada, China, Mexico, Poland, Turkey and Ukraine felt that the measures  
31 292 implemented due to COVID-19 made it more difficult for them to be present, and more than 70% from  
32 293 China, Mexico, Poland and Turkey to be interactive with their newborn, e.g. regarding skin-to-skin  
33 294 contact (Table 2).

34 295  
35 296 The possibilities to have skin-to-skin contact with the infant differed between countries, with  
36 297 significantly high proportions of respondents in Mexico (47%) and Turkey (49%) indicating that skin-  
37 298 to-skin care was not initiated during the time in the hospital (Supplementary Table S5). In China, most  
38 299 respondents (85%) answered that skin-to-skin care had not yet been initiated (if still in the hospital). In  
39 300 the remaining countries, skin-to-skin care was mainly initiated after the first day but during the first  
40 301 week with few exceptions having high answer rates with regards to an early initiation (immediately after  
41 302 birth or on the first day) such as France. In Sweden and France >80% of the mothers were permitted to  
42 303 have skin-to-skin contact with their newborn as often as they wanted. While >95% of the respondents  
43 304 from Australia, Brazil, Canada, France, New Zealand and Sweden could touch their newborn in the  
44 305 incubator or bed as often as they wanted or at least once per day, 92% of the participants in China, and  
45 306 60% in Turkey were not permitted to do so (Table 2).

46 307  
47 308 The involvement in the care was perceived differently by parents across countries. While participants  
48 309 from Australia, France, New Zealand and Sweden felt they were highly involved in the care by  
49 310 medical and nursing staff (>80%), more than 70% of participants in China, Poland, Turkey and  
50 311 Ukraine felt that staff did neither include them nor their partner in the care. In addition, while the  
51 312 majority of participants from Sweden (85%) responded that also their partner was highly involved by  
52 313 medical and nursing staff, this was not the case for participants in Turkey.

314 Table 2. Presence with the newborn and skin-to-skin care

|                                                                                                                                                                                                                                                                           | Total              | Australia         | Brazil           | Canada           | China            | France            | Italy            | Mexico           | New Zealand      | Poland            | Sweden            | Turkey            | Ukraine           |
|---------------------------------------------------------------------------------------------------------------------------------------------------------------------------------------------------------------------------------------------------------------------------|--------------------|-------------------|------------------|------------------|------------------|-------------------|------------------|------------------|------------------|-------------------|-------------------|-------------------|-------------------|
| <b>Do you know if the Coronavirus/COVID-19 situation affected the facility policy around your ability to be present with the baby receiving special/intensive care?</b>                                                                                                   |                    |                   |                  |                  |                  |                   |                  |                  |                  |                   |                   |                   |                   |
|                                                                                                                                                                                                                                                                           | n = 991            | n = 55            | n = 34           | n = 49           | n = 52           | n = 110           | n = 34           | n = 37           | n = 31           | n = 132           | n = 73            | n = 288           | n = 96            |
| There were no changes                                                                                                                                                                                                                                                     | 80 (8%)            | 7 (13%)           | 2 (6%)           | 2 (4%)           | 5 (10%)          | 12 (11%)          | 4 (12%)          | 2 (5%)           | 4 (13%)          | 4 (3%)            | 23 (32%)          | 10 (3%)           | 5 (5%)            |
| Restrictions were implemented                                                                                                                                                                                                                                             | 816 (82%)          | 44 (80%)          | 30 (88%)         | 44 (90%)         | 36 (69%)         | 94 (85%)          | 27 (79%)         | 34 (92%)         | 25 (81%)         | 118 (89%)         | 44 (60%)          | 241 (84%)         | 79 (82%)          |
| I don't know if there were changes                                                                                                                                                                                                                                        | 95 (10%)           | 4 (7%)            | 2 (6%)           | 3 (6%)           | 11 (21%)         | 4 (4%)            | 3 (9%)           | 1 (3%)           | 2 (6%)           | 10 (8%)           | 6 (8%)            | 37 (13%)          | 12 (13%)          |
| <b>Who was allowed to be present with your baby receiving special/intensive care? (multiple answers possible)</b>                                                                                                                                                         |                    |                   |                  |                  |                  |                   |                  |                  |                  |                   |                   |                   |                   |
|                                                                                                                                                                                                                                                                           | n = 991            | n = 55            | n = 34           | n = 49           | n = 52           | n = 110           | n = 34           | n = 37           | n = 31           | n = 132           | n = 73            | n = 288           | n = 96            |
| <b>Sum of multiple answers</b>                                                                                                                                                                                                                                            | <b>1497 (151%)</b> | <b>112 (204%)</b> | <b>57 (168%)</b> | <b>89 (182%)</b> | <b>73 (140%)</b> | <b>215 (195%)</b> | <b>59 (174%)</b> | <b>57 (154%)</b> | <b>56 (181%)</b> | <b>155 (117%)</b> | <b>145 (199%)</b> | <b>368 (128%)</b> | <b>111 (116%)</b> |
| Mother                                                                                                                                                                                                                                                                    | 680 (69%)          | 52 (95%)          | 30 (88%)         | 44 (90%)         | 18 (35%)         | 101 (92%)         | 30 (88%)         | 25 (68%)         | 28 (90%)         | 84 (64%)          | 60 (82%)          | 142 (49%)         | 66 (69%)          |
| Father/partner                                                                                                                                                                                                                                                            | 501 (51%)          | 54 (98%)          | 24 (71%)         | 42 (86%)         | 15 (29%)         | 106 (96%)         | 27 (79%)         | 23 (62%)         | 26 (84%)         | 19 (14%)          | 68 (93%)          | 84 (29%)          | 13 (14%)          |
| Sibling/s                                                                                                                                                                                                                                                                 | 27 (3%)            | 3 (5%)            | 0 (0%)           | 1 (2%)           | 3 (6%)           | 6 (5%)            | 0 (0%)           | 0 (0%)           | 1 (3%)           | 0 (0%)            | 12 (16%)          | 0 (0%)            | 1 (1%)            |
| Other family members                                                                                                                                                                                                                                                      | 14 (1%)            | 3 (5%)            | 2 (6%)           | 1 (2%)           | 3 (6%)           | 0 (0%)            | 0 (0%)           | 1 (3%)           | 1 (3%)           | 0 (0%)            | 3 (4%)            | 0 (0%)            | 0 (0%)            |
| Friends                                                                                                                                                                                                                                                                   | 2 (0%)             | 0 (0%)            | 0 (0%)           | 1 (2%)           | 0 (0%)           | 0 (0%)            | 0 (0%)           | 0 (0%)           | 0 (0%)           | 0 (0%)            | 1 (1%)            | 0 (0%)            | 0 (0%)            |
| No one                                                                                                                                                                                                                                                                    | 265 (27%)          | 0 (0%)            | 1 (3%)           | 0 (0%)           | 27 (52%)         | 2 (2%)            | 2 (6%)           | 8 (22%)          | 0 (0%)           | 52 (39%)          | 1 (1%)            | 141 (49%)         | 31 (32%)          |
| I don't know                                                                                                                                                                                                                                                              | 8 (1%)             | 0 (0%)            | 0 (0%)           | 0 (0%)           | 7 (13%)          | 0 (0%)            | 0 (0%)           | 0 (0%)           | 0 (0%)           | 0 (0%)            | 0 (0%)            | 1 (0%)            | 0 (0%)            |
| <b>Could more than one person be present with the baby at the same time?</b>                                                                                                                                                                                              |                    |                   |                  |                  |                  |                   |                  |                  |                  |                   |                   |                   |                   |
|                                                                                                                                                                                                                                                                           | n = 990            | n = 55            | n = 34           | n = 49           | n = 52           | n = 110           | n = 34           | n = 37           | n = 31           | n = 130           | n = 74            | n = 288           | n = 96            |
| Yes                                                                                                                                                                                                                                                                       | 326 (33%)          | 31 (56%)          | 9 (26%)          | 20 (41%)         | 27 (52%)         | 70 (64%)          | 2 (6%)           | 2 (5%)           | 16 (52%)         | 5 (4%)            | 62 (84%)          | 66 (23%)          | 16 (17%)          |
| No                                                                                                                                                                                                                                                                        | 664 (67%)          | 24 (44%)          | 25 (74%)         | 29 (59%)         | 25 (48%)         | 40 (36%)          | 32 (94%)         | 35 (95%)         | 15 (48%)         | 125 (96%)         | 12 (16%)          | 222 (77%)         | 80 (83%)          |
| <b>How long were you allowed to see your baby per visit?</b>                                                                                                                                                                                                              |                    |                   |                  |                  |                  |                   |                  |                  |                  |                   |                   |                   |                   |
|                                                                                                                                                                                                                                                                           | n = 989            | n = 55            | n = 34           | n = 49           | n = 52           | n = 109           | n = 34           | n = 37           | n = 31           | n = 131           | n = 73            | n = 288           | n = 96            |
| Up to an hour                                                                                                                                                                                                                                                             | 338 (34%)          | 1 (2%)            | 11 (32%)         | 0 (0%)           | 2 (4%)           | 0 (0%)            | 11 (32%)         | 31 (84%)         | 0 (0%)           | 44 (34%)          | 0 (0%)            | 186 (65%)         | 52 (54%)          |
| More than one hour, up to three hours                                                                                                                                                                                                                                     | 41 (4%)            | 2 (4%)            | 1 (3%)           | 0 (0%)           | 4 (8%)           | 5 (5%)            | 3 (9%)           | 1 (3%)           | 0 (0%)           | 22 (17%)          | 0 (0%)            | 2 (1%)            | 1 (1%)            |
| More than three hours, but not unlimited                                                                                                                                                                                                                                  | 51 (5%)            | 5 (9%)            | 5 (15%)          | 2 (4%)           | 1 (2%)           | 15 (14%)          | 3 (9%)           | 0 (0%)           | 4 (13%)          | 4 (3%)            | 2 (3%)            | 1 (0%)            | 9 (9%)            |
| Unlimited                                                                                                                                                                                                                                                                 | 360 (36%)          | 47 (85%)          | 16 (47%)         | 47 (96%)         | 0 (0%)           | 88 (81%)          | 15 (44%)         | 1 (3%)           | 27 (87%)         | 27 (21%)          | 70 (96%)          | 2 (1%)            | 20 (21%)          |
| Not at all                                                                                                                                                                                                                                                                | 199 (20%)          | 0 (0%)            | 1 (3%)           | 0 (0%)           | 45 (87%)         | 1 (1%)            | 2 (6%)           | 4 (11%)          | 0 (0%)           | 34 (26%)          | 1 (1%)            | 97 (34%)          | 14 (15%)          |
| <b>Do you feel that the measures that were implemented due to Coronavirus/COVID-19 (e.g. restrictions by hospital management) made it more difficult for you to be present with your baby?</b>                                                                            |                    |                   |                  |                  |                  |                   |                  |                  |                  |                   |                   |                   |                   |
|                                                                                                                                                                                                                                                                           | n = 990            | n = 55            | n = 34           | n = 48           | n = 51           | n = 110           | n = 34           | n = 37           | n = 31           | n = 132           | n = 74            | n = 288           | n = 96            |
| Yes                                                                                                                                                                                                                                                                       | 726 (73%)          | 33 (60%)          | 18 (53%)         | 37 (77%)         | 39 (76%)         | 61 (55%)          | 19 (56%)         | 35 (95%)         | 20 (65%)         | 112 (85%)         | 14 (19%)          | 263 (91%)         | 75 (78%)          |
| No, not more difficult                                                                                                                                                                                                                                                    | 192 (19%)          | 17 (31%)          | 15 (44%)         | 10 (21%)         | 3 (6%)           | 42 (38%)          | 14 (41%)         | 1 (3%)           | 7 (23%)          | 17 (13%)          | 46 (62%)          | 11 (4%)           | 9 (9%)            |
| No, there were no restrictive measures in place                                                                                                                                                                                                                           | 39 (4%)            | 4 (7%)            | 1 (3%)           | 1 (2%)           | 0 (0%)           | 4 (4%)            | 1 (3%)           | 1 (3%)           | 3 (10%)          | 2 (2%)            | 11 (15%)          | 3 (1%)            | 8 (8%)            |
| Don't know                                                                                                                                                                                                                                                                | 33 (3%)            | 1 (2%)            | 0 (0%)           | 0 (0%)           | 9 (18%)          | 3 (3%)            | 0 (0%)           | 0 (0%)           | 1 (3%)           | 1 (1%)            | 3 (4%)            | 11 (4%)           | 4 (4%)            |
| <b>Do you feel that the measures that were implemented due to Coronavirus/COVID-19 (e.g. restrictions by hospital management) made it more difficult for you to be interactive with your baby (e.g. skin-to-skin contact or being involved in the care of your baby)?</b> |                    |                   |                  |                  |                  |                   |                  |                  |                  |                   |                   |                   |                   |
|                                                                                                                                                                                                                                                                           | n = 989            | n = 55            | n = 34           | n = 49           | n = 51           | n = 110           | n = 34           | n = 37           | n = 31           | n = 132           | n = 74            | n = 286           | n = 96            |
| Yes                                                                                                                                                                                                                                                                       | 634 (64%)          | 13 (24%)          | 15 (44%)         | 27 (55%)         | 38 (75%)         | 41 (37%)          | 21 (62%)         | 36 (97%)         | 9 (29%)          | 106 (80%)         | 9 (12%)           | 266 (93%)         | 53 (55%)          |



|                                                                                                                                                  | Total           | Australia     | Brazil        | Canada        | China         | France         | Italy         | Mexico        | New Zealand   | Poland         | Sweden        | Turkey         | Ukraine        |
|--------------------------------------------------------------------------------------------------------------------------------------------------|-----------------|---------------|---------------|---------------|---------------|----------------|---------------|---------------|---------------|----------------|---------------|----------------|----------------|
| No, not more difficult                                                                                                                           | 258 (26%)       | 31 (56%)      | 16 (47%)      | 16 (33%)      | 4 (8%)        | 53 (48%)       | 11 (32%)      | 0 (0%)        | 13 (42%)      | 22 (17%)       | 46 (62%)      | 11 (4%)        | 35 (36%)       |
| No, there were no restrictive measures in place                                                                                                  | 72 (7%)         | 10 (18%)      | 2 (6%)        | 5 (10%)       | 0 (0%)        | 15 (14%)       | 1 (3%)        | 1 (3%)        | 9 (29%)       | 3 (2%)         | 18 (24%)      | 4 (1%)         | 4 (4%)         |
| Don't know                                                                                                                                       | 25 (3%)         | 1 (2%)        | 1 (3%)        | 1 (2%)        | 9 (18%)       | 1 (1%)         | 1 (3%)        | 0 (0%)        | 0 (0%)        | 1 (1%)         | 1 (1%)        | 5 (2%)         | 4 (4%)         |
| <b>When was skin-to-skin contact with your baby and one of the parents initiated (e.g. holding the baby on the chest, kangaroo mother care)?</b> |                 |               |               |               |               |                |               |               |               |                |               |                |                |
|                                                                                                                                                  | <b>n = 1044</b> | <b>n = 56</b> | <b>n = 33</b> | <b>n = 49</b> | <b>n = 52</b> | <b>n = 117</b> | <b>n = 35</b> | <b>n = 38</b> | <b>n = 31</b> | <b>n = 146</b> | <b>n = 75</b> | <b>n = 308</b> | <b>n = 104</b> |
| Immediately after birth                                                                                                                          | 65 (6%)         | 7 (13%)       | 1 (3%)        | 8 (16%)       | 2 (4%)        | 13 (11%)       | 1 (3%)        | 0 (0%)        | 5 (16%)       | 7 (5%)         | 11 (15%)      | 4 (1%)         | 6 (6%)         |
| On the first day                                                                                                                                 | 99 (9%)         | 14 (25%)      | 0 (0%)        | 7 (14%)       | 0 (0%)        | 43 (37%)       | 1 (3%)        | 0 (0%)        | 5 (16%)       | 4 (3%)         | 19 (25%)      | 4 (1%)         | 2 (2%)         |
| After the first day but during the first week                                                                                                    | 236 (23%)       | 23 (41%)      | 8 (24%)       | 21 (43%)      | 0 (0%)        | 45 (38%)       | 8 (23%)       | 3 (8%)        | 14 (45%)      | 36 (25%)       | 35 (47%)      | 17 (6%)        | 26 (25%)       |
| After the first week                                                                                                                             | 244 (23%)       | 11 (20%)      | 21 (64%)      | 13 (27%)      | 4 (8%)        | 14 (12%)       | 18 (51%)      | 13 (34%)      | 7 (23%)       | 32 (22%)       | 10 (13%)      | 60 (19%)       | 41 (39%)       |
| Not so far (If still in hospital)                                                                                                                | 156 (15%)       | 1 (2%)        | 2 (6%)        | 0 (0%)        | 44 (85%)      | 1 (1%)         | 0 (0%)        | 4 (11%)       | 0 (0%)        | 19 (13%)       | 0 (0%)        | 72 (23%)       | 13 (13%)       |
| Not during the time in the hospital if discharged                                                                                                | 244 (23%)       | 0 (0%)        | 1 (3%)        | 0 (0%)        | 2 (4%)        | 1 (1%)         | 7 (20%)       | 18 (47%)      | 0 (0%)        | 48 (33%)       | 0 (0%)        | 151 (49%)      | 16 (15%)       |
| <b>How often were you permitted to have skin-to-skin contact (kangaroo mother care) with your baby?</b>                                          |                 |               |               |               |               |                |               |               |               |                |               |                |                |
|                                                                                                                                                  | <b>n = 1043</b> | <b>n = 56</b> | <b>n = 32</b> | <b>n = 49</b> | <b>n = 52</b> | <b>n = 118</b> | <b>n = 34</b> | <b>n = 38</b> | <b>n = 31</b> | <b>n = 146</b> | <b>n = 75</b> | <b>n = 308</b> | <b>n = 104</b> |
| As often as I wanted                                                                                                                             | 302 (29%)       | 18 (32%)      | 14 (44%)      | 25 (51%)      | 0 (0%)        | 99 (84%)       | 8 (24%)       | 0 (0%)        | 16 (52%)      | 12 (8%)        | 63 (84%)      | 11 (4%)        | 36 (35%)       |
| At least once per day                                                                                                                            | 227 (22%)       | 31 (55%)      | 11 (34%)      | 21 (43%)      | 2 (4%)        | 15 (13%)       | 13 (38%)      | 12 (32%)      | 12 (39%)      | 31 (21%)       | 9 (12%)       | 43 (14%)       | 27 (26%)       |
| At least once per week                                                                                                                           | 64 (6%)         | 6 (11%)       | 3 (9%)        | 2 (4%)        | 0 (0%)        | 2 (2%)         | 3 (9%)        | 4 (11%)       | 3 (10%)       | 17 (12%)       | 3 (4%)        | 18 (6%)        | 3 (3%)         |
| Less than once per week                                                                                                                          | 77 (7%)         | 0 (0%)        | 1 (3%)        | 1 (2%)        | 2 (4%)        | 1 (1%)         | 4 (12%)       | 7 (18%)       | 0 (0%)        | 24 (16%)       | 0 (0%)        | 29 (9%)        | 8 (8%)         |
| Not so far                                                                                                                                       | 373 (36%)       | 1 (2%)        | 3 (9%)        | 0 (0%)        | 48 (92%)      | 1 (1%)         | 6 (18%)       | 15 (39%)      | 0 (0%)        | 62 (42%)       | 0 (0%)        | 207 (67%)      | 30 (29%)       |
| <b>Did medical/nursing staff involve you in the care of your baby (e.g. nappy changing, feeding, temperature taking)?</b>                        |                 |               |               |               |               |                |               |               |               |                |               |                |                |
|                                                                                                                                                  | <b>n = 989</b>  | <b>n = 55</b> | <b>n = 34</b> | <b>n = 49</b> | <b>n = 51</b> | <b>n = 110</b> | <b>n = 34</b> | <b>n = 37</b> | <b>n = 31</b> | <b>n = 131</b> | <b>n = 74</b> | <b>n = 287</b> | <b>n = 96</b>  |
| Yes, to a high degree                                                                                                                            | 438 (44%)       | 44 (80%)      | 15 (44%)      | 34 (69%)      | 4 (8%)        | 102 (93%)      | 22 (65%)      | 6 (16%)       | 27 (87%)      | 48 (37%)       | 67 (91%)      | 22 (8%)        | 47 (49%)       |
| Yes, to some degree                                                                                                                              | 180 (18%)       | 10 (18%)      | 10 (29%)      | 15 (31%)      | 3 (6%)        | 7 (6%)         | 10 (29%)      | 11 (30%)      | 4 (13%)       | 29 (22%)       | 7 (9%)        | 53 (18%)       | 21 (22%)       |
| No, not at all                                                                                                                                   | 364 (37%)       | 1 (2%)        | 9 (26%)       | 0 (0%)        | 40 (78%)      | 1 (1%)         | 2 (6%)        | 20 (54%)      | 0 (0%)        | 53 (40%)       | 0 (0%)        | 211 (74%)      | 27 (28%)       |
| Don't know                                                                                                                                       | 7 (1%)          | 0 (0%)        | 0 (0%)        | 0 (0%)        | 4 (8%)        | 0 (0%)         | 0 (0%)        | 0 (0%)        | 0 (0%)        | 1 (1%)         | 0 (0%)        | 1 (0%)         | 1 (1%)         |
| <b>Did medical/nursing staff involve your partner in the care of your baby?</b>                                                                  |                 |               |               |               |               |                |               |               |               |                |               |                |                |
|                                                                                                                                                  | <b>n = 990</b>  | <b>n = 55</b> | <b>n = 34</b> | <b>n = 49</b> | <b>n = 51</b> | <b>n = 110</b> | <b>n = 34</b> | <b>n = 37</b> | <b>n = 31</b> | <b>n = 131</b> | <b>n = 74</b> | <b>n = 288</b> | <b>n = 96</b>  |
| Yes, to a high degree                                                                                                                            | 274 (28%)       | 35 (64%)      | 4 (12%)       | 29 (59%)      | 3 (6%)        | 87 (79%)       | 19 (56%)      | 5 (14%)       | 18 (58%)      | 2 (2%)         | 63 (85%)      | 4 (1%)         | 5 (5%)         |
| Yes, to some degree                                                                                                                              | 121 (12%)       | 18 (33%)      | 9 (26%)       | 14 (29%)      | 4 (8%)        | 15 (14%)       | 8 (24%)       | 6 (16%)       | 6 (19%)       | 10 (8%)        | 7 (9%)        | 18 (6%)        | 6 (6%)         |
| No, not at all                                                                                                                                   | 567 (57%)       | 1 (2%)        | 19 (56%)      | 6 (12%)       | 39 (76%)      | 6 (5%)         | 6 (18%)       | 24 (65%)      | 5 (16%)       | 114 (87%)      | 3 (4%)        | 263 (91%)      | 81 (84%)       |
| Don't know                                                                                                                                       | 17 (2%)         | 0 (0%)        | 2 (6%)        | 0 (0%)        | 5 (10%)       | 0 (0%)         | 1 (3%)        | 1 (3%)        | 0 (0%)        | 4 (3%)         | 0 (0%)        | 1 (0%)         | 3 (3%)         |
| I don't have a partner                                                                                                                           | 11 (1%)         | 1 (2%)        | 0 (0%)        | 0 (0%)        | 0 (0%)        | 2 (2%)         | 0 (0%)        | 1 (3%)        | 2 (6%)        | 1 (1%)         | 1 (1%)        | 2 (1%)         | 1 (1%)         |

Blue: 95% confidence interval: significantly higher than total (for detailed results see Supplementary Table S5)

Green: 95% confidence interval: significantly lower than total (for detailed results see Supplementary Table S5)

## 317 **Nutrition and breastfeeding**

318  
319 In total, 89% of the respondents answered that their newborns were fed with breastmilk (breastfeeding  
320 or pumped milk), 22% received donor human milk and 34% were fed with infant formula (multiple  
321 response question; Supplementary Table S6). Initiation of breastfeeding was highly (50%) or somewhat  
322 (26%) encouraged by medical/nursing staff in most countries (Supplementary Table S6). Overall, 18%  
323 indicated that breastfeeding was not encouraged at all. This lack of encouragement was especially noted  
324 in Italy (32%), Poland and Turkey (>25%). However, newborns in Italy and Turkey were in over 90%  
325 of cases still exclusively or partly breastfed or provided with mother's own pumped/expressed  
326 breastmilk in the first weeks after birth (Supplementary Table S6).

327  
328 Also, the initiation of breastfeeding differed across countries. In Canada, first breastfeeding or provision  
329 of mother's own pumped/expressed breastmilk took place on the first day (57%) or after the first day  
330 but during the first week (37%). Likewise, in Australia, France and New Zealand, >50% of the  
331 respondents indicated that breastfeeding was initiated on the first day. In Mexico, 50% of the babies  
332 received first breastmilk after the first week. In Brazil, France, Italy and Ukraine more than 20% of the  
333 babies were first breastfed after the first week (Supplementary Table S6).

334  
335 In most countries, the respondents were allowed to bring expressed milk from home to the unit (76%).  
336 In Brazil, the milk had to be expressed at the hospital (71%). In New Zealand, Poland, Sweden and  
337 Ukraine more than 10% of the respondents indicated that they were not allowed to bring expressed milk  
338 from home to the unit.

## 339 340 **Health information and communication**

341  
342 Almost 90% of the respondents felt that they had received adequate general health information about  
343 their newborn during the hospital stay either to a high or some degree (Supplementary Table S7). Parents  
344 from Australia, Brazil, Canada, France, Italy, New Zealand and Sweden indicated to a high degree of  
345 having received general health information (>50%). While 84% of the respondents from China indicated  
346 that they received general health information to a high or to some degree, 10% answered that they did  
347 not receive any information.

348  
349 Almost 80% of the respondents received information about their newborn multiple times per day or once  
350 per day (Supplementary Table S7). General health information was mostly communicated to the parents  
351 in face-to-face meetings with medical/nursing staff (76%) or via phone calls (50%).

352  
353 Overall, more than 60% of the respondents from Italy felt to a high degree that they had received  
354 adequate information about how to protect themselves and their newborn from a COVID-19  
355 transmission. In China, 50% felt that they knew how to prevent transmission. A similar result could be  
356 observed at discharge from the hospital: in Italy and China where about 40% of the respondents indicated  
357 that they received adequate information about COVID-19 to a high degree. In Poland, almost 40% of  
358 the respondents felt they had not received any information about COVID-19 when being discharged  
359 from the hospital (Supplementary Table S7).

## 360 361 **Parents' mental health and support**

362  
363 More than three-quarters of the respondents indicated being worried about the COVID-19 situation  
364 during pregnancy. For 9% of the respondents, COVID-19 was not an issue, and 10% did not worry about  
365 the virus at all. While most respondents from Mexico worried about COVID-19 during pregnancy to a  
366 high degree (71%), this was only the case for 18% of the respondents from China (Figure 2A). After  
367 birth, 90% of the total respondents worried about the COVID-19 situation to a high or to some degree.  
368 Parents from Brazil worried to a high degree (94%), while more than half of the parents from China  
369 were not at all concerned (Figure 2A).

370  
371 Overall, 42% of the respondents felt they were adequately informed about mental health support to a  
372 high or some degree (Figure 2B). However, 38% felt they were not at all informed, and in 17% of the

cases there was no mental health support. The results show that proportions of having received adequate information were highest in Australia and lowest in Turkey and Mexico. The absence of mental health support was highest in Ukraine and Poland (34%). If support was offered, most parents received psychological counselling (29%) and help from a social worker (19%). In total, 48% of the respondents answered that no support was offered (Supplementary Table S8).

[Figure 2 here]

## DISCUSSION

The COVID-19 pandemic has disrupted healthcare systems, and further challenged the already inadequate application of an IFCDC approach in many countries worldwide. Measures to stem virus transmission have resulted in (additional) restrictions affecting preterm, sick, and low birthweight infants, one of the most vulnerable groups of patients [18,22]. Highlighting the importance of IFCDC and by taking a patient/parent-centred approach, this study has identified parents' perceptions to different policy measures across 12 countries, with severe implications for both IFCDC as well as the health outcomes of vulnerable infants born during the pandemic [28–30]. In what follows, we will reflect upon the key findings that emerged from our multi-country research, covering data from Australia, Brazil, Canada, China, France, Italy, Mexico, New Zealand, Poland, Sweden, Turkey, and Ukraine.

Perinatal care was impacted by the pandemic and respective restrictions, in particular with regard to having support persons present during both pregnancy-related appointments and birth. Our findings have shown that while some countries have hardly restricted the presence of accompanying persons during birth (such as Australia, New Zealand, Canada and Sweden), in many other countries it was not permitted to have a support person present (as for example in >60% in China, Ukraine, Turkey, and >85% in Poland and Mexico). This restriction finally leaves the person giving birth without any emotional, informational, and practical support from a person of trust. In contrast with such pandemic-related restrictions, previous research showed that having a support person present fulfilling these tasks facilitates non-pharmacological pain relief as well as bonding, and improves maternal well-being [29,30,46,47], which clearly highlights the benefits as well as the importance of labour companionship. In its recommendations on "Intrapartum care for a positive childbirth experience", the WHO advocates for a companion of choice for all women throughout labour and childbirth [48] also during the pandemic [49]. Thus, global health agendas do no longer exclusively focus on the reduction of birth complications, yet they have expanded their scope and have started to emphasise the importance of maternal and newborn health and well-being, and that mother and child should also thrive and enjoy their full potential of health [33]. Partners should therefore be allowed access to enable a respectful childbirth experience, yet this opportunity is too often being withheld as our research showed.

This study also revealed shortcomings regarding presence and involvement of family members while the newborn needed special/intensive care, which confirms results of similar studies [14,22,24,33,50]. As we have learned from our findings [18], restrictions were implemented and, besides some exceptions (e.g. in Australia, Canada, France, New Zealand and Sweden), in seven out of 12 countries, partly only the mother was allowed to be present with the newborn. The other parent, however, was less likely to have access with strict access restrictions e.g. in Poland and Ukraine, and siblings as well as other family members were hardly ever allowed in the neonatal intensive care unit in any country. Most importantly, our results showed that there are countries (e.g. Turkey and China) where nobody (not even father or mother) was allowed to be with the hospitalised infant. Thus, extremely strict access measures following a severe separation policy between parents and their vulnerable infant were implemented. Parental-infant bonding, however, can only take place if the parents are present and given the opportunity to care for their newborn [34,51–53]. Not including parents in caring, planning, and participation in decision-making processes pertaining to their newborn, will less likely establish feelings of competency and a healthy parent-child relationship [51]. Research shows that if the parents feel empowered to care for the child, maternal stress and anxiety can be reduced and hospital stays may be shorter [54,55]. Despite this, involving parents and seeing them as primary caregivers also depends on the mind-set of healthcare professionals [16].



429  
430 Separating family members, and in particular parents from their newborns has severe consequences for  
431 the care provision and health outcomes of the vulnerable infant, for example due to limited possibilities  
432 for skin-to-skin care and KMC [22,53]. For almost one quarter of the total respondents, skin-to-skin  
433 contact with the newborn was not initiated during the time in the hospital, with particular strict measures  
434 in Mexico and Turkey, even though the benefits of practices such as KMC are undisputed [16,56–60].  
435 The positive influence on developmental outcomes far outweighs the potential risk of death due to  
436 COVID-19 as research highlights [31]. Survival benefits of immediate KMC seem to be higher  
437 compared to those of conventional care in an incubator or a radiant warmer, as a recent randomised  
438 control trial conducted in low-resource hospital shows [60], making further research also in well-  
439 resourced settings necessary. These findings highlight that newborns should not be separated from their  
440 parents; our study unfortunately shows that the separation of parents and their newborn is (still) common  
441 practice as a minimum during the pandemic.

442  
443 Even though a large majority of parents felt adequately informed about their newborn, almost 40% of  
444 the total respondents were not involved at all in the care of their baby (e.g. nappy changing, feeding,  
445 temperature taking) and almost 60% indicated that their partner was not involved in caring for the  
446 newborn, leaving them without any practice when the infant was discharged. Strong country-specific  
447 differences show that the involvement of the parents was encouraged more in Australia, Canada, France,  
448 Italy, New Zealand and Sweden in comparison to China, Poland, Turkey and Ukraine. Moreover, the  
449 implemented measures during COVID-19 made parental presence and interaction with the baby more  
450 difficult for parents in Mexico, Poland and Turkey than in Australia, France, New Zealand and Sweden.  
451 Although we could observe considerable country-specific differences on specific elements of IFCDC,  
452 overall, some countries such as New Zealand and Sweden, performed uniformly well, while other  
453 countries fell behind. These differences could be partly explained by the government response  
454 stringency indexes between August and November 2020 (lowest in New Zealand; highest in China;  
455 Supplementary Table S2) [43]. The differences can also be interpreted as a prioritisation of a holistic  
456 IFCDC approach in some countries which might have already put a greater focus on this care approach  
457 in the pre-pandemic phase compared to others, e.g. China [20]. However, comprehensive data on the  
458 national and international implementation of the different aspects of IFCDC is lacking [61] and thus,  
459 the results need to be interpreted with caution.

460  
461 In contrast to parental presence and skin-to-skin contact, breastfeeding does not seem to have been  
462 impacted to the same degree. Despite various implemented restrictions, our data did not suggest that the  
463 ability to breastfeed or breastfeeding in general was discouraged by nursing staff across the 12 countries.  
464 Although about 30% of the parents from Italy and Mexico indicated that breastfeeding was not  
465 encouraged at all by nursing staff – against the current WHO recommendation [62] – this did not  
466 influence the number of infants being breastfed or provided with mother's own pumped or expressed  
467 breastmilk at least in the first weeks after birth (>90%). It has been outlined that globally, breastfeeding  
468 has not been prioritised and encouraged during the pandemic, e.g. due to early discharge and limited  
469 lactation support, with possible negative implications for its initiation [32,63,64]. Our data, however,  
470 implies that breastfeeding, as one element of IFCDC, was somewhat less affected by the restrictions, at  
471 least in the hospital. However, this study does not show the long-term trend and potential continuation  
472 of breastfeeding, e.g. also in case of early discharge which frequently occurred during the pandemic  
473 [21].

474  
475 Having a newborn requiring special/intensive care is in itself a stressful situation for parents, and even  
476 more so during a pandemic. Preterm birth can be associated with a number of adverse maternal  
477 psychological outcomes, among others anxiety and psychological distress [65,66]. The COVID-19  
478 pandemic, as an additional contributing factor to emotional distress and with an increased risk for  
479 psychiatric illness [67] and postnatal depression [68], makes parents of a preterm, sick or low  
480 birthweight infant increasingly vulnerable to developing mental health issues. Our results show that the  
481 COVID-19 situation was especially worrisome for parents in Brazil, Canada and Mexico after the birth  
482 of their baby. These results do not seem to be related to the cumulative COVID-19 cases or the  
483 government response stringency index in the respective countries (Supplementary Table S2). At the  
484 same time, parents from Brazil, Canada and Mexico, together with those from Turkey, did not feel well

1  
2  
3 485 informed about mental health and support. Early intervention is however important, and mental health  
4 486 support should be offered as early as possible and already during the hospital stay [65]. In an emergency  
5 487 situation, such as the COVID-19 pandemic, the focus on health and early supportive measures should  
6 488 be even more pronounced.  
7 489

8 490 This study has several strengths that merit attention, and contextual factors that need to be outlined. The  
9 491 cross-country approach, data collection in 12 countries and extensive outreach allowed us to acquire  
10 492 valuable and in-depth insights into parents' perspectives and experiences regarding IFCDC during the  
11 493 first year of the COVID-19 pandemic. Pre-testing of the questionnaire reduced methodological  
12 494 inaccuracies and ensured that data was collected in a sensitive way. The findings comprehensively  
13 495 reflect the parent perspective across multiple countries giving insights into country-specific differences  
14 496 which are worthwhile to derive suggestions for improvements on the global and country-specific policy  
15 497 level.  
16 498

17 499 The study has limitations that need to be acknowledged. Due to limited access and outreach possibilities  
18 500 in our network, we were not able to collect a representative set of data in particularly African and  
19 501 Southeast-Asian countries. In many countries in these regions, parent representative organisations do  
20 502 either not exist or do not have a strong lobby, which is in itself an important finding and worthwhile to  
21 503 investigate further. Setting up the study in an online format furthermore bears the risk of selection bias  
22 504 [69], and response rates could not be calculated as information on non-responders, in particular, during  
23 505 the pandemic state is not available. Due to missing demographics on neonates receiving special/intensive  
24 506 care in the different countries, we were unable to assess the representativeness of the sample. We  
25 507 furthermore acknowledge the high c-section rate in the sample, which, however, must be put in context  
26 508 as we study a high-risk population requiring admission of the infant to the NICU or special care unit  
27 509 (inclusion criterium). We are aware that participants completed the survey at different care stages (i.e.  
28 510 during/after hospitalisation) with a potential impact on the parents' perceived experiences. It also needs  
29 511 to be acknowledged that different countries, cultures, settings, income levels, political- and health care  
30 512 systems, as well as the individual countries' contribution to the full sample comprise a potential risk of  
31 513 confounding bias. The reported overall percentages are influenced by the number of responses per  
32 514 country (countries with more responses influence the total more) and could not be weighed in another  
33 515 meaningful way. Thereby, country comparison with overall percentages needs to be interpreted with  
34 516 caution. Moreover, the calculation of confidence intervals has limitations as only one answer option per  
35 517 question was selected for further analysis to aid readability.  
36 518

37 519 The study reflects a point in time and we are unable to compare our findings to pre-pandemic contexts.  
38 520 We acknowledge that strong variation has already existed between and within countries in the field of  
39 521 newborn care, in particular regarding IFCDC implementation [61], which is not exclusively related to  
40 522 the COVID-19 pandemic. Additionally, the respective pandemic situation, geographical, climatic and  
41 523 environmental aspects, as well as containment strategies vary between (and sometimes even within)  
42 524 countries and might have influenced on the one hand, the COVID-19 related policy approach and on the  
43 525 other hand, the results in the respective countries [43,70]. This has to be acknowledged when comparing  
44 526 results between countries and interpreting potential implications of the COVID-19 incidence on IFCDC  
45 527 on a country level.  
46 528  
47 529

## 50 530 **CONCLUSION**

51 531  
52 532 To the best of our knowledge, this is the first multi-country comparison of parents' experiences  
53 533 regarding special/intensive care for newborns during the first year of the COVID-19 pandemic on a  
54 534 country level. The pandemic has challenged healthcare systems leading to disruptions in the care of the  
55 535 most vulnerable groups of patients, namely preterm, sick, and low birthweight infants. Pandemic related  
56 536 restrictions are certainly necessary to prevent and reduce transmission of SARS-CoV-2. However,  
57 537 restrictions in parental presence and the missing possibility for skin-to-skin contact, together with  
58 538 lacking mental health support are global health drawbacks threatening newborn survival, quality of life  
59 539 of survivors and their families, and hinder the achievement of the 2030 Development Agenda. This study  
60 540 provides unique opportunities for public health experts, policy makers, and healthcare professionals

alike to learn from country-specific differences and in-depth insights and consequences from different approaches. It is essential to listen to and acknowledge parents' voices and experiences. Immediate action is necessary, including the reconsideration of implemented restrictions to strengthen an IFCDC approach, both during and in the absence of a global crisis [71,72]. This action requires a set of measures, including a safe and supportive care environment during and after pregnancy, labour and birth, and the implementation of a zero separation and family-inclusive policy in hospitals.

### **Acknowledgements**

We thank all study respondents and very much appreciate their time and invaluable commitment. We also thank all representatives of national parent organisations and experts, who have supported translation and dissemination of the survey.

### **Collaborators**

COVID-19 Zero Separation Collaborative Group (in alphabetical order): Mandy Daly (NIDCAP, USA and Irish Neonatal Health Alliance, Ireland), Camilla Gizzi (UENPS, Department of Pediatrics - Sandro Pertini Hospital, Rome, Italy), Agnes van den Hoogen (ESPR, Geneva, Switzerland, COINN, Utrecht University and UMC Utrecht, The Netherlands), Gigi Khonyongwa-Fernandez (NICU Parent Network (NPN), USA), Mary Kinney (University of the Western Cape, South Africa), Kerstin Mondry (European Foundation for the Care of Newborn Infants (EFCNI), Munich, Germany), Corrado Moretti (UENPS, Emeritus Consultant in Paediatrics, Policlinico Umberto I, Sapienza University of Rome, Italy), Ilknur Okay (El Bebek Gül Bebek Derneği, Turkey), Kylie Pussell (Miracle Babies Foundation, Australia), Charles C. Roehr (ESPR, Geneva, Switzerland, and National Perinatal Epidemiology Unit, Nuffield Department of Population Health, University of Oxford, UK), Eleni Vavouraki (Ilitominon, Greece), Karen Walker (COINN, Royal Prince Alfred Hospital, University of Sydney, Australia)

### **Contributors**

The EFCNI scientific team conceptualised the study and set up the online-survey under the lead of JK and with critical feedback by LZ, SM, and the members of the COVID-19 Zero Separation Collaborative Group. The COVID-19 Zero Separation Collaborative Group substantially supported the recruitment of respondents. CRP and JH were responsible for the statistical analysis, with feedback by JK, AW, and LZ. JK, CRP, and JH drafted the manuscript which was shared with and continuously reviewed by AW, SM, and LZ. JK, JH, CRP, AW, LZ, and SM interpreted and had full access to the data. All authors critically revised and have read and approved the final manuscript.

### **Funding**

During the conduct of this project, EFCNI was supported by Novartis Pharma AG with an earmarked donation for this study (grant award number: not applicable/ NA). The research was independently conducted by the authors of this paper. The donor had no role in any step of the research project.

### **Competing interests**

The authors report an earmarked donation from Novartis Pharma AG during the conduct of the study.

### **Patient consent for publication**

Not required.

### **Ethics approval**

The Ethics Committee of Maastricht UMC+, the Netherlands, has waived the need for ethical approval for this study (MECT 2020-1336).

### **Data availability statement**

Deidentified participant data are available from the corresponding author on reasonable request (S.MaderOffice@efcni.org).

### **Figures**

1  
2  
3  
4  
5  
6  
7  
8  
9  
10  
11  
12  
13  
14  
15  
16  
17  
18  
19  
20  
21  
22  
23  
24  
25  
26  
27  
28  
29  
30  
31  
32  
33  
34  
35  
36  
37  
38  
39  
40  
41  
42  
43  
44  
45  
46  
47  
48  
49  
50  
51  
52  
53  
54  
55  
56  
57  
58  
59  
60

595 Figure 1. Distribution of respondents by country and parental presence with newborn per country (A),  
596 presence of support persons during pregnancy-related appointments (B), and labour companionship  
597 (C)  
598 Figure 2. Country-specific proportions on A. the concern about the COVID-19 situation and B. mental  
599 health support

For peer review only

600 **REFERENCES**

- 601
- 602 1. United Nations Statistics Division. Goal 3: Ensure healthy lives and promote well-being for all  
603 at all ages. 2021. Available from: <https://unstats.un.org/sdgs/report/2017/goal-03/>
- 604 2. Coll-Seck A, Clark H, Bahl R, Peterson S, Costello A, Lucas T. Framing an agenda for children  
605 thriving in the SDG era: a WHO–UNICEF–Lancet Commission on Child Health and Wellbeing.  
606 *The Lancet*. 2019 Jan;393(10167):109–12.
- 607 3. Semaan A, Audet C, Huysmans E, Afolabi B, Assarag B, Banke-Thomas A, et al. Voices from the  
608 frontline: findings from a thematic analysis of a rapid online global survey of maternal and  
609 newborn health professionals facing the COVID-19 pandemic. *BMJ Glob Health*. 2020  
610 Jun;5(6):e002967.
- 611 4. Shapira G, Ahmed T, Drouard SHP, Amor Fernandez P, Kandpal E, Nzelu C, et al. Disruptions in  
612 maternal and child health service utilization during COVID-19: analysis from eight sub-Saharan  
613 African countries. *Health Policy and Planning*. 2021 Aug 12;36(7):1140–51.
- 614 5. Shapira G, de Walque D, Friedman J. How many infants may have died in low-income and  
615 middle-income countries in 2020 due to the economic contraction accompanying the COVID-19  
616 pandemic? Mortality projections based on forecasted declines in economic growth. *BMJ Open*.  
617 2021;11(9).
- 618 6. Liu L, Oza S, Hogan D, Chu Y, Perin J, Zhu J, et al. Global, regional, and national causes of  
619 under-5 mortality in 2000–15: an updated systematic analysis with implications for the  
620 Sustainable Development Goals. *The Lancet*. 2016 Dec;388(10063):3027–35.
- 621 7. Althabe F, Howson CP, Kinney M, Lawn J, World Health Organization. Born too soon: the global  
622 action report on preterm birth. 2012. Available from:  
623 <http://www.who.int/pmnch/media/news/2012/201204%5Fborntoosoon-report.pdf>
- 624 8. WHO. Causes of newborn mortality and morbidity in the European Region. Available from:  
625 [https://www.euro.who.int/en/health-topics/Life-stages/maternal-and-newborn-health/causes-of-](https://www.euro.who.int/en/health-topics/Life-stages/maternal-and-newborn-health/causes-of-newborn-mortality-and-morbidity-in-the-european-region)  
626 [newborn-mortality-and-morbidity-in-the-european-region](https://www.euro.who.int/en/health-topics/Life-stages/maternal-and-newborn-health/causes-of-newborn-mortality-and-morbidity-in-the-european-region)
- 627 9. Chawanpaiboon S, Vogel JP, Moller A-B, Lumbiganon P, Petzold M, Hogan D, et al. Global,  
628 regional, and national estimates of levels of preterm birth in 2014: a systematic review and  
629 modelling analysis. *The Lancet Global Health*. 2019 Jan;7(1):e37–46.
- 630 10. Lehtonen L, Gimeno A, Parra-Llorca A, Vento M. Early neonatal death: A challenge worldwide.  
631 *Semin Fetal Neonatal Med*. 2017;22(3):153–60.
- 632 11. EACH European Association for Children in Hospital. The EACH Charter with annotations.  
633 EACH; 2016. Available from: [www.each-for-sick-children.org](http://www.each-for-sick-children.org)
- 634 12. UN Commission on Human Rights. Convention on the Rights of the Child, E/CN.4/RES/1990/74.  
635 General Assembly; 1990.
- 636 13. McAdams RM. Family separation during COVID-19. *Pediatr Res*. 2021 Apr;89(5):1317–8.
- 637 14. Bembich S, Tripani A, Mastromarino S, Di Risio G, Castelpietra E, Risso FM. Parents  
638 experiencing NICU visit restrictions due to COVID-19 pandemic. *Acta Paediatr*. 2020 Oct  
639 28;apa.15620.
- 640 15. Muniraman H, Ali M, Cawley P, Hillyer J, Heathcote A, Ponnusamy V, et al. Parental perceptions  
641 of the impact of neonatal unit visitation policies during COVID-19 pandemic. *bmjpo*. 2020  
642 Nov;4(1):e000899.



- 1  
2  
3 643 16. Oude Maatman SM, Bohlin K, Lilliesköld S, Garberg HT, Uitewaal-Poslawky I, Kars MC, et al.  
4 644 Factors Influencing Implementation of Family-Centered Care in a Neonatal Intensive Care Unit.  
5 645 *Front Pediatr.* 2020 May 6;8:222.  
6  
7 646 17. Ding X, Zhu L, Zhang R, Wang L, Wang T-T, Latour JM. Effects of family-centred care  
8 647 interventions on preterm infants and parents in neonatal intensive care units: A systematic review  
9 648 and meta-analysis of randomised controlled trials. *Australian Critical Care.* 2019 Jan;32(1):63–75.  
10  
11 649 18. Kostenzer J, Hoffmann J, von Rosenstiel-Pulver C, Walsh A, Zimmermann L, Mader S, et al.  
12 650 Neonatal care during the COVID-19 pandemic – a global survey of parents’ experiences regarding  
13 651 infant and family-centred developmental care. 2021;  
14  
15 652 19. Stefani G, Skopec M, Battersby C, Harris M. Why is Kangaroo Mother Care not yet scaled in the  
16 653 UK? A systematic review and realist synthesis of a frugal innovation for newborn care. *BMJ*  
17 654 *Innov.* 2021 Oct 22;bmjinnov-2021-000828.  
18  
19 655 20. Yue J, Liu J, Williams S, Zhang B, Zhao Y, Zhang Q, et al. Barriers and facilitators of kangaroo  
20 656 mother care adoption in five Chinese hospitals: a qualitative study. *BMC Public Health.* 2020  
21 657 Dec;20(1):1234.  
22  
23 658 21. Rao SPN, Minckas N, Medvedev MM, Gathara D, Y N P, Seifu Estifanos A, et al. Small and sick  
24 659 newborn care during the COVID-19 pandemic: global survey and thematic analysis of healthcare  
25 660 providers’ voices and experiences. *BMJ Glob Health.* 2021 Mar;6(3):e004347.  
26  
27 661 22. Litmanovitz I, Silberstein D, Butler S, Vittner D. Care of hospitalized infants and their families  
28 662 during the COVID-19 pandemic: an international survey. *J Perinatol.* 2021 Mar 23 [cited 2021  
29 663 Mar 26]; Available from: <http://www.nature.com/articles/s41372-021-00960-8>  
30  
31 664 23. Harding C, Aloysius A, Bell N, Edney S, Gordon Z, Lewis H, et al. Reflections on COVID -19  
32 665 and the potential impact on preterm infant feeding and speech, language and communication  
33 666 development. *Journal of Neonatal Nursing.* 2021 Jun;27(3):220–2.  
34  
35 667 24. Green J, Staff L, Bromley P, Jones L, Petty J. The implications of face masks for babies and  
36 668 families during the COVID-19 pandemic: A discussion paper. *Journal of Neonatal Nursing.* 2021  
37 669 Feb;27(1):21–5.  
38  
39 670 25. European Foundation for the Care of Newborn Infants, Bergman NJ, Westrup B, et. al. European  
40 671 Standards of Care for Newborn Health: Project Report. EFCNI; 2018. Available from:  
41 672 [www.efcni.org/wp-content/uploads/2018/11/2018\\_11\\_16\\_ESCNH\\_Report\\_final.pdf](http://www.efcni.org/wp-content/uploads/2018/11/2018_11_16_ESCNH_Report_final.pdf)  
42  
43 673 26. Mushtaq A, Kazi F. Family-centred care in the NICU. *The Lancet Child & Adolescent Health.*  
44 674 2019 May;3(5):295–6.  
45  
46 675 27. Damhuis G, König K, Westrup B, Kuhn P, Daly M, Bertonecelli N, et al. European Standards of  
47 676 Care for Newborn Health: Infant- and family-centred developmental care. European Foundation  
48 677 for the Care of Newborn Infants (EFCNI); 2018. Available from: [https://newborn-health-standards.org/wp-content/uploads/2019/10/TEG\\_IFCDC\\_complete.pdf](https://newborn-health-standards.org/wp-content/uploads/2019/10/TEG_IFCDC_complete.pdf)  
49 678  
50 679 28. Scala M, Marchman VA, Brignoni-Pérez E, Morales MC, Travis KE. Impact of the COVID-19  
51 680 pandemic on developmental care practices for infants born preterm. *Pediatrics;* 2020 Nov [cited  
52 681 2021 Mar 26]. Available from: <http://medrxiv.org/lookup/doi/10.1101/2020.11.25.20238956>  
53  
54 682 29. Darcey-Mahoney A, White RD, Velasquez A, Barrett TS, Clark RH, Ahmad KA. Impact of  
55 683 Restrictions on Parental Presence in Neonatal Intensive Care Units Related to COVID-19.  
56 684 *Pediatrics;* 2020 Jul [cited 2020 Sep 23]. Available from:  
57 685 <http://medrxiv.org/lookup/doi/10.1101/2020.07.22.20158949>

- 1  
2  
3 686 30. Salvatore CM, Han J-Y, Acker KP, Tiwari P, Jin J, Brandler M, et al. Neonatal management and  
4 687 outcomes during the COVID-19 pandemic: an observation cohort study. *The Lancet Child &*  
5 688 *Adolescent Health*. 2020 Oct;4(10):721–7.
- 6  
7 689 31. Minckas N, Medvedev MM, Adejuyigbe EA, Brotherton H, Chellani H, Estifanos AS, et al.  
8 690 Preterm care during the COVID-19 pandemic: A comparative risk analysis of neonatal deaths  
9 691 averted by kangaroo mother care versus mortality due to SARS-CoV-2 infection.  
10 692 *EClinicalMedicine*. 2021 Feb;100733.
- 11  
12 693 32. Brown A, Shenker N. Experiences of breastfeeding during COVID-19: Lessons for future  
13 694 practical and emotional support. *Matern Child Nutr*. 2021 Jan;17(1). Available from:  
14 695 <https://onlinelibrary.wiley.com/doi/10.1111/mcn.13088>
- 15  
16 696 33. van Veenendaal NR, Deierl A, Bacchini F, O'Brien K, Franck LS, The International Steering  
17 697 Committee for Family Integrated Care. Supporting parents as essential care partners in neonatal  
18 698 units during the SARS-CoV-2 pandemic. *Acta Paediatrica*. 2021 Mar 26;apa.15857.
- 19  
20 699 34. BLISS for babies born premature or sick. Locked out: the impact of COVID-19 on neonatal care.  
21 700 2021. Available from: [https://s3.eu-west-2.amazonaws.com/files.bliss.org.uk/images/Locked-out-](https://s3.eu-west-2.amazonaws.com/files.bliss.org.uk/images/Locked-out-the-impact-of-COVID-19-on-neonatal-care-final.pdf?mtime=20210519184749&focal=none)  
22 701 [the-impact-of-COVID-19-on-neonatal-care-final.pdf?mtime=20210519184749&focal=none](https://s3.eu-west-2.amazonaws.com/files.bliss.org.uk/images/Locked-out-the-impact-of-COVID-19-on-neonatal-care-final.pdf?mtime=20210519184749&focal=none)
- 23  
24 702 35. Eysenbach G. Improving the quality of Web surveys: the Checklist for Reporting Results of  
25 703 Internet E-Surveys (CHERRIES). *J Med Internet Res*. 2004 Sep 29;6(3):e34.
- 26  
27 704 36. World Health Organization. WHO COVID-19 Dashboard. Geneva; 2020. Available from:  
28 705 <https://covid19.who.int>
- 29  
30 706 37. World Health Organization. COVID-19 Weekly Epidemiological Update - 29 November 2020.  
31 707 WHO: Geneva, Switzerland; 2020 [cited 2021 Jun 28]. Available from:  
32 708 <https://www.who.int/publications/m/item/weekly-epidemiological-update---1-december-2020>
- 33  
34 709 38. Yan B, Zhang X, Wu L, Zhu H, Chen B. Why Do Countries Respond Differently to COVID-19?  
35 710 A Comparative Study of Sweden, China, France, and Japan. *The American Review of Public*  
36 711 *Administration*. 2020 Aug;50(6–7):762–9.
- 37  
38 712 39. Claeson M, Hanson S. COVID-19 and the Swedish enigma. *The Lancet*. 2021  
39 713 Jan;397(10271):259–61.
- 40  
41 714 40. Baral S, Chandler R, Prieto RG, Gupta S, Mishra S, Kulldorff M. Leveraging epidemiological  
42 715 principles to evaluate Sweden's COVID-19 response. *Annals of Epidemiology*. 2021 Feb;54:21–  
43 716 6.
- 44  
45 717 41. Amer F, Hammoud S, Farran B, Boncz I, Endrei D. Assessment of Countries' Preparedness and  
46 718 Lockdown Effectiveness in Fighting COVID-19. *Disaster med public health prep*. 2021  
47 719 Apr;15(2):e15–22.
- 48  
49 720 42. Garcia PJ, Alarcón A, Bayer A, Buss P, Guerra G, Ribeiro H, et al. COVID-19 Response in Latin  
50 721 America. *The American Journal of Tropical Medicine and Hygiene*. 2020 Nov 4;103(5):1765–72.
- 51  
52 722 43. Hale T, Angrist N, Goldszmidt R, Kira B, Petherick A, Phillips T, et al. A global panel database  
53 723 of pandemic policies (Oxford COVID-19 Government Response Tracker). *Nat Hum Behav*. 2021  
54 724 Apr;5(4):529–38.
- 55  
56 725 44. World Health Organization. Trends in maternal mortality 2000 to 2017: estimates by WHO,  
57 726 UNICEF, UNFPA, World Bank Group and the United Nations Population Division. Geneva:  
58 727 World Health Organization; 2019. Available from: <https://apps.who.int/iris/handle/10665/327595>

- 1  
2  
3 728 45. UN Inter-agency Group for Child Mortality Estimation. Most recent stillbirth, child and  
4 729 adolescent mortality estimates. 2019 [cited 2021 Nov 26]. Available from:  
5 730 <https://childmortality.org/>  
6  
7 731 46. Bohren MA, Berger BO, Munthe-Kaas H, Tunçalp Ö. Perceptions and experiences of labour  
8 732 companionship: a qualitative evidence synthesis. *Cochrane Effective Practice and Organisation of*  
9 733 *Care Group*, editor. *Cochrane Database of Systematic Reviews*. 2019 Mar 18; Available from:  
10 734 <http://doi.wiley.com/10.1002/14651858.CD012449.pub2>  
11  
12 735 47. Shakibazadeh E, Namadian M, Bohren M, Vogel J, Rashidian A, Nogueira Pileggi V, et al.  
13 736 Respectful care during childbirth in health facilities globally: a qualitative evidence synthesis.  
14 737 *BJOG: Int J Obstet Gy*. 2018 Jul;125(8):932–42.  
15  
16 738 48. WHO. WHO recommendations Intrapartum care for a positive childbirth experience -  
17 739 Transforming care of women and babies for improved health and well-being. WHO: Geneva,  
18 740 Switzerland; 2018.  
19  
20 741 49. World Health Organization. Coronavirus disease (COVID-19): Pregnancy and childbirth. 2020  
21 742 [cited 2021 Aug 2]. Available from: [www.who.int/news-room/q-a-detail/coronavirus-disease-](http://www.who.int/news-room/q-a-detail/coronavirus-disease-covid-19-pregnancy-and-childbirth)  
22 743 [covid-19-pregnancy-and-childbirth](http://www.who.int/news-room/q-a-detail/coronavirus-disease-covid-19-pregnancy-and-childbirth)  
23  
24 744 50. Cena L, Biban P, Janos J, Lavelli M, Langfus J, Tsai A, et al. The Collateral Impact of COVID-19  
25 745 Emergency on Neonatal Intensive Care Units and Family-Centered Care: Challenges and  
26 746 Opportunities. *Front Psychol*. 2021 Feb 24;12:630594.  
27  
28 747 51. Boronat N, Escarti A, Vento M. We want our families in the NICU! *Pediatr Res*. 2020  
29 748 Sep;88(3):354–5.  
30  
31 749 52. Gooding JS, Cooper LG, Blaine AI, Franck LS, Howse JL, Berns SD. Family support and family-  
32 750 centered care in the neonatal intensive care unit: origins, advances, impact. *Semin Perinatol*. 2011  
33 751 Feb;35(1):20–8.  
34  
35 752 53. Bergman NJ. Birth practices: Maternal-neonate separation as a source of toxic stress. *Birth*  
36 753 *Defects Research*. 2019 Sep;111(15):1087–109.  
37  
38 754 54. Saenz P, Cerda M, Diaz JL, Yi P, Gorba M, Boronat N, et al. Psychological stress of parents of  
39 755 preterm infants enrolled in an early discharge programme from the neonatal intensive care unit: a  
40 756 prospective randomised trial. *Archives of Disease in Childhood - Fetal and Neonatal Edition*.  
41 757 2009 Mar 1;94(2):F98–104.  
42  
43 758 55. Ortenstrand A, Westrup B, Brostrom EB, Sarman I, Akerstrom S, Brune T, et al. The Stockholm  
44 759 Neonatal Family Centered Care Study: Effects on Length of Stay and Infant Morbidity.  
45 760 *PEDIATRICS*. 2010 Feb 1;125(2):e278–85.  
46  
47 761 56. Lv B, Gao X, Sun J, Li T, Liu Z, Zhu L, et al. Family-Centered Care Improves Clinical Outcomes  
48 762 of Very-Low-Birth-Weight Infants: A Quasi-Experimental Study. *Front Pediatr*. 2019 Apr  
49 763 12;7:138.  
50  
51 764 57. Ding X, Zhu L, Zhang R, Wang L, Wang T-T, Latour JM. Effects of family-centred care  
52 765 interventions on preterm infants and parents in neonatal intensive care units: A systematic review  
53 766 and meta-analysis of randomised controlled trials. *Australian Critical Care*. 2019 Jan;32(1):63–75.  
54  
55 767 58. Bhutta ZA, Das JK, Bahl R, Lawn JE, Salam RA, Paul VK, et al. Can available interventions end  
56 768 preventable deaths in mothers, newborn babies, and stillbirths, and at what cost? *The Lancet*. 2014  
57 769 Jul;384(9940):347–70.  
58  
59  
60



- 1  
2  
3 770 59. Mazumder S, Taneja S, Dube B, Bhatia K, Ghosh R, Shekhar M, et al. Effect of community-  
4 771 initiated kangaroo mother care on survival of infants with low birthweight: a randomised  
5 772 controlled trial. *The Lancet*. 2019 Nov;394(10210):1724–36.
- 6  
7 773 60. WHO Immediate KMC Study Group. Immediate “Kangaroo Mother Care” and Survival of Infants  
8 774 with Low Birth Weight. *N Engl J Med*. 2021 May 27;384(21):2028–38.
- 9  
10 775 61. Al-Motlaq MA, Carter B, Neill S, Hallstrom IK, Foster M, Coyne I, et al. Toward developing  
11 776 consensus on family-centred care: An international descriptive study and discussion. *J Child*  
12 777 *Health Care*. 2019 Sep;23(3):458–67.
- 13  
14 778 62. WHO. Breastfeeding and COVID-19. 2020 [cited 2021 Jun 9]. Available from:  
15 779 [https://www.who.int/publications/i/item/WHO-2019-nCoV-Sci\\_Brief-Breastfeeding-2020.1](https://www.who.int/publications/i/item/WHO-2019-nCoV-Sci_Brief-Breastfeeding-2020.1)
- 16  
17 780 63. Spatz DL, Davanzo R, Müller JA, Powell R, Rigourd V, Yates A, et al. Promoting and Protecting  
18 781 Human Milk and Breastfeeding in a COVID-19 World. *Front Pediatr*. 2021 Feb 3;8:633700.
- 19  
20 782 64. Rollins N, Minckas N, Jehan F, Lodha R, Raiten D, Thorne C, et al. A public health approach for  
21 783 deciding policy on infant feeding and mother–infant contact in the context of COVID-19. *The*  
22 784 *Lancet Global Health*. 2021 Apr;9(4):e552–7.
- 23  
24 785 65. Misund AR, Nerdrum P, Diseth TH. Mental health in women experiencing preterm birth. *BMC*  
25 786 *Pregnancy Childbirth*. 2014 Dec;14(1):263.
- 26  
27 787 66. Simon S, Moreyra A, Wharton E, Dowtin LL, Borkovi TC, Armer E, et al. Prevention of  
28 788 posttraumatic stress disorder in mothers of preterm infants using trauma-focused group therapy:  
29 789 Manual development and evaluation. *Early Human Development*. 2021 Mar;154:105282.
- 30  
31 790 67. Pfefferbaum B, North CS. Mental Health and the Covid-19 Pandemic. *N Engl J Med*. 2020 Aug  
32 791 6;383(6):510–2.
- 33  
34 792 68. Chmielewska B, Barratt I, Townsend R, Kalafat E, van der Meulen J, Gurol-Urganci I, et al.  
35 793 Effects of the COVID-19 pandemic on maternal and perinatal outcomes: a systematic review and  
36 794 meta-analysis. *The Lancet Global Health*. 2021 Mar;S2214109X21000796.
- 37  
38 795 69. Blumenberg C, Barros AJD. Response rate differences between web and alternative data  
39 796 collection methods for public health research: a systematic review of the literature. *Int J Public*  
40 797 *Health*. 2018 Jul;63(6):765–73.
- 41  
42 798 70. Murgante B, Borruso G, Balletto G, Castiglia P, Dettori M. Why Italy First? Health, Geographical  
43 799 and Planning Aspects of the COVID-19 Outbreak. *Sustainability*. 2020 Jun 22;12(12):5064.
- 44  
45 800 71. EFCNI, Kostenzer J, von Rosenstiel-Pulver C, Hoffmann J, Walsh A, Fügenschuh S, et al. Zero  
46 801 separation. Together for better care! Infant and family-centred developmental care in times of  
47 802 COVID-19 – A global survey of parents’ experiences Project Report. EFCNI; 2021.
- 48  
49 803 72. Kostenzer J, Zimmermann LJI, Mader S, Abenstein A, Daly M, Fügenschuh S, et al. Zero  
50 804 separation: infant and family-centred developmental care in times of COVID-19. *The Lancet*  
51 805 *Child & Adolescent Health*. 2021 Nov;S2352464221003400.
- 52  
53  
54  
55 806  
56  
57  
58  
59  
60

1  
2  
3  
4  
5  
6  
7  
8  
9  
10  
11  
12  
13  
14  
15  
16  
17  
18  
19  
20  
21  
22  
23  
24  
25  
26  
27  
28  
29  
30  
31  
32  
33  
34  
35  
36  
37  
38  
39  
40  
41  
42  
43  
44  
45  
46  
47  
48  
49  
50  
51  
52  
53  
54  
55  
56  
57  
58  
59  
60

807 **SUPPLEMENTARY MATERIAL**

- 808  
809 Supplementary Table S1  
810 Title: Baseline and COVID-19 related characteristics of participants  
811  
812 Supplementary Table S2  
813 Title: Country demographics and COVID-19 related characteristics  
814  
815 Supplementary Table S3  
816 Title: Prenatal care and birth  
817  
818 Supplementary Table S4  
819 Title: Presence with the newborn  
820  
821 Supplementary Table S5  
822 Title: 95% confidence interval of questions related to presence with the newborn and skin-to-skin care  
823  
824 Supplementary Table S6  
825 Title: Information on breastfeeding/nutrition  
826  
827 Supplementary Table S7  
828 Title: Information on health communication  
829  
830 Supplementary Table S8  
831 Title: Information on mental health status  
832  
833 Supplementary Material S9  
834 Title: Survey

A. Participants per country (n=1148)



B. Presence of another person during pregnancy-related appointments (n=1044)



C. Presence of another person during birth (n=1045)



Figure 1. Distribution of respondents by country and parental presence with newborn per country (A), presence of support persons during pregnancy-related appointments (B), and labour companionship (C)

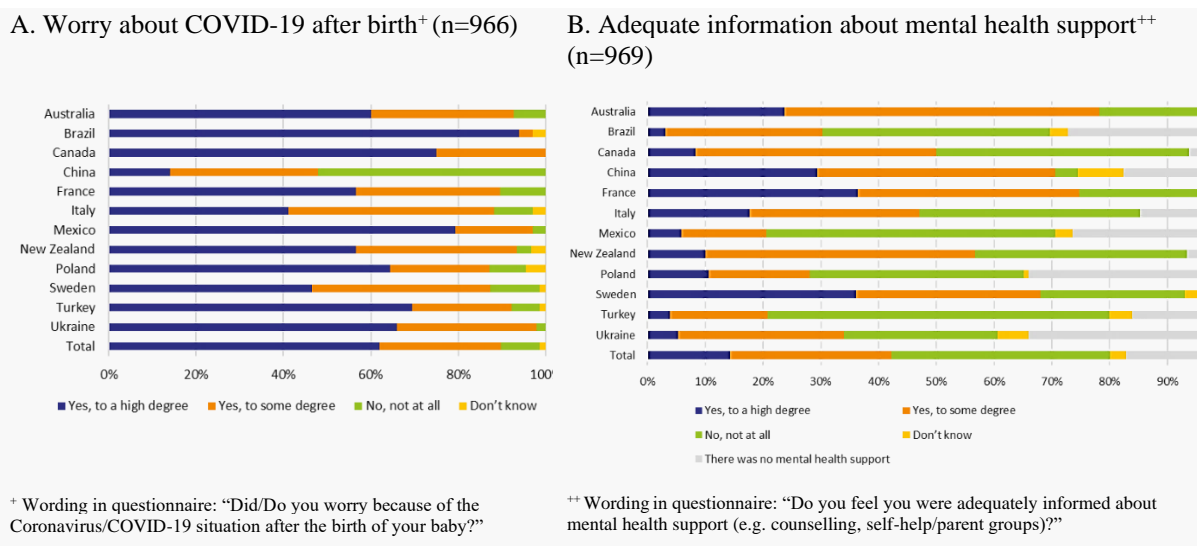

Figure 2. Country-specific proportions on A. the concern about the COVID-19 situation and B. mental health support

1  
2  
3 **SUPPLEMENTARY MATERIAL**  
4

5 **Supplementary Table S1**

6 Title: Baseline and COVID-19 related characteristics of participants  
7

8 **Supplementary Table S2**

9 Title: Country demographics and COVID-19 related characteristics  
10

11 **Supplementary Table S3**

12 Title: Prenatal care and birth  
13

14 **Supplementary Table S4**

15 Title: Presence with the newborn  
16

17 **Supplementary Table S5**

18 Title: 95% confidence interval of questions related to presence with the newborn and skin-to-skin care  
19  
20

21 **Supplementary Table S6**

22 Title: Information on breastfeeding/nutrition  
23

24 **Supplementary Table S7**

25 Title: Information on health communication  
26

27 **Supplementary Table S8**

28 Title: Information on mental health status  
29

30 **Supplementary Material S9**

31 Title: Survey  
32  
33  
34  
35  
36  
37  
38  
39  
40  
41  
42  
43  
44  
45  
46  
47  
48  
49  
50  
51  
52  
53  
54  
55  
56  
57  
58  
59  
60

Supplementary Table S1. Baseline and COVID-19 related characteristics of participants

|                                                   | Total           | Australia     | Brazil        | Canada        | China         | France         | Italy         | Mexico        | New Zealand   | Poland         | Sweden        | Turkey         | Ukraine        |
|---------------------------------------------------|-----------------|---------------|---------------|---------------|---------------|----------------|---------------|---------------|---------------|----------------|---------------|----------------|----------------|
| <b>Age of respondent (years)</b>                  |                 |               |               |               |               |                |               |               |               |                |               |                |                |
|                                                   | <b>n = 1146</b> | <b>n = 58</b> | <b>n = 38</b> | <b>n = 52</b> | <b>n = 60</b> | <b>n = 125</b> | <b>n = 38</b> | <b>n = 40</b> | <b>n = 31</b> | <b>n = 160</b> | <b>n = 78</b> | <b>n = 357</b> | <b>n = 109</b> |
| <20                                               | 5 (0%)          | 1 (2%)        | 0 (0%)        | 0 (0%)        | 1 (2%)        | 1 (1%)         | 0 (0%)        | 1 (3%)        | 0 (0%)        | 0 (0%)         | 0 (0%)        | 1 (0%)         | 0 (0%)         |
| 20-29                                             | 468 (41%)       | 14 (24%)      | 15 (39%)      | 15 (29%)      | 16 (27%)      | 40 (32%)       | 2 (5%)        | 18 (45%)      | 15 (48%)      | 70 (44%)       | 24 (31%)      | 205 (57%)      | 34 (31%)       |
| 30-39                                             | 608 (53%)       | 39 (67%)      | 20 (53%)      | 30 (58%)      | 38 (63%)      | 78 (62%)       | 30 (79%)      | 18 (45%)      | 15 (48%)      | 84 (53%)       | 46 (59%)      | 136 (38%)      | 74 (68%)       |
| >40                                               | 65 (6%)         | 4 (7%)        | 3 (8%)        | 7 (13%)       | 5 (8%)        | 6 (5%)         | 6 (16%)       | 3 (8%)        | 1 (3%)        | 6 (4%)         | 8 (10%)       | 15 (4%)        | 1 (1%)         |
| <b>Gestational age at birth (weeks)</b>           |                 |               |               |               |               |                |               |               |               |                |               |                |                |
|                                                   | <b>n = 1107</b> | <b>n = 58</b> | <b>n = 37</b> | <b>n = 49</b> | <b>n = 53</b> | <b>n = 123</b> | <b>n = 36</b> | <b>n = 41</b> | <b>n = 31</b> | <b>n = 154</b> | <b>n = 75</b> | <b>n = 344</b> | <b>n = 106</b> |
| Early preterm: <28                                | 270 (24%)       | 22 (38%)      | 9 (24%)       | 15 (31%)      | 18 (34%)      | 40 (33%)       | 9 (25%)       | 4 (10%)       | 6 (19%)       | 40 (26%)       | 23 (31%)      | 67 (19%)       | 17 (16%)       |
| Very preterm: 28-<br><32                          | 389 (35%)       | 10 (17%)      | 16 (43%)      | 14 (29%)      | 29 (55%)      | 36 (29%)       | 10 (28%)      | 20 (49%)      | 7 (23%)       | 48 (31%)       | 27 (36%)      | 140 (41%)      | 32 (30%)       |
| Moderate to late<br>preterm: 32-<br><37           | 412 (37%)       | 20 (34%)      | 12 (32%)      | 20 (41%)      | 6 (11%)       | 43 (35%)       | 15 (42%)      | 15 (37%)      | 15 (48%)      | 64 (42%)       | 19 (25%)      | 131 (38%)      | 52 (49%)       |
| Term: 37-42                                       | 36 (3%)         | 6 (10%)       | 0 (0%)        | 0 (0%)        | 0 (0%)        | 4 (3%)         | 2 (6%)        | 2 (5%)        | 3 (10%)       | 2 (1%)         | 6 (8%)        | 6 (2%)         | 5 (5%)         |
| <b>Multiple pregnancy</b>                         |                 |               |               |               |               |                |               |               |               |                |               |                |                |
|                                                   | <b>n = 1112</b> | <b>n = 58</b> | <b>n = 37</b> | <b>n = 49</b> | <b>n = 54</b> | <b>n = 124</b> | <b>n = 36</b> | <b>n = 41</b> | <b>n = 31</b> | <b>n = 154</b> | <b>n = 75</b> | <b>n = 344</b> | <b>n = 109</b> |
| Yes                                               | 180 (16%)       | 12 (21%)      | 7 (19%)       | 6 (12%)       | 18 (33%)      | 14 (11%)       | 5 (14%)       | 4 (10%)       | 3 (10%)       | 14 (9%)        | 16 (21%)      | 65 (19%)       | 16 (15%)       |
| No                                                | 932 (84%)       | 46 (79%)      | 30 (81%)      | 43 (88%)      | 36 (67%)      | 110 (89%)      | 31 (86%)      | 37 (90%)      | 28 (90%)      | 140 (91%)      | 59 (79%)      | 279 (81%)      | 93 (85%)       |
| <b>Birth mode</b>                                 |                 |               |               |               |               |                |               |               |               |                |               |                |                |
|                                                   | <b>n = 1111</b> | <b>n = 58</b> | <b>n = 37</b> | <b>n = 50</b> | <b>n = 54</b> | <b>n = 124</b> | <b>n = 36</b> | <b>n = 41</b> | <b>n = 30</b> | <b>n = 153</b> | <b>n = 75</b> | <b>n = 344</b> | <b>n = 109</b> |
| Vaginal birth                                     | 301 (27%)       | 18 (31%)      | 6 (16%)       | 22 (44%)      | 24 (44%)      | 62 (50%)       | 14 (39%)      | 6 (15%)       | 6 (20%)       | 42 (27%)       | 28 (37%)      | 38 (11%)       | 35 (32%)       |
| C-section                                         | 804 (72%)       | 39 (67%)      | 31 (84%)      | 28 (56%)      | 29 (54%)      | 62 (50%)       | 21 (58%)      | 35 (85%)      | 24 (80%)      | 111 (73%)      | 47 (63%)      | 304 (88%)      | 73 (67%)       |
| Both (e.g. in case of<br>multiple pregnancy)      | 6 (1%)          | 1 (2%)        | 0 (0%)        | 0 (0%)        | 1 (2%)        | 0 (0%)         | 1 (3%)        | 0 (0%)        | 0 (0%)        | 0 (0%)         | 0 (0%)        | 2 (1%)         | 1 (1%)         |
| <b>Birth weight of the baby (grams)</b>           |                 |               |               |               |               |                |               |               |               |                |               |                |                |
|                                                   | <b>n = 1110</b> | <b>n = 58</b> | <b>n = 37</b> | <b>n = 50</b> | <b>n = 54</b> | <b>n = 124</b> | <b>n = 36</b> | <b>n = 41</b> | <b>n = 31</b> | <b>n = 154</b> | <b>n = 75</b> | <b>n = 342</b> | <b>n = 108</b> |
| <1000                                             | 290 (26%)       | 20 (34%)      | 10 (27%)      | 18 (36%)      | 15 (28%)      | 45 (36%)       | 14 (39%)      | 6 (15%)       | 8 (26%)       | 35 (23%)       | 27 (36%)      | 78 (23%)       | 14 (13%)       |
| 1000-1500                                         | 373 (34%)       | 14 (24%)      | 15 (41%)      | 11 (22%)      | 28 (52%)      | 28 (23%)       | 5 (14%)       | 18 (44%)      | 7 (23%)       | 57 (37%)       | 18 (24%)      | 130 (38%)      | 42 (39%)       |
| >1500-2500                                        | 374 (34%)       | 16 (28%)      | 12 (32%)      | 15 (30%)      | 10 (19%)      | 45 (36%)       | 16 (44%)      | 13 (32%)      | 10 (32%)      | 53 (34%)       | 19 (25%)      | 120 (35%)      | 45 (42%)       |
| >2500                                             | 71 (6%)         | 8 (14%)       | 0 (0%)        | 6 (12%)       | 1 (2%)        | 6 (5%)         | 1 (3%)        | 4 (10%)       | 6 (19%)       | 9 (6%)         | 10 (13%)      | 14 (4%)        | 6 (6%)         |
| Don't know the<br>birth weight                    | 2 (0%)          | 0 (0%)        | 0 (0%)        | 0 (0%)        | 0 (0%)        | 0 (0%)         | 0 (0%)        | 0 (0%)        | 0 (0%)        | 0 (0%)         | 1 (1%)        | 0 (0%)         | 1 (1%)         |
| <b>Duration of special/intensive care (weeks)</b> |                 |               |               |               |               |                |               |               |               |                |               |                |                |
|                                                   | <b>n = 1112</b> | <b>n = 58</b> | <b>n = 37</b> | <b>n = 50</b> | <b>n = 54</b> | <b>n = 124</b> | <b>n = 36</b> | <b>n = 41</b> | <b>n = 31</b> | <b>n = 154</b> | <b>n = 75</b> | <b>n = 344</b> | <b>n = 108</b> |
| <1                                                | 81 (7%)         | 3 (5%)        | 0 (0%)        | 5 (10%)       | 5 (9%)        | 4 (3%)         | 4 (11%)       | 3 (7%)        | 1 (3%)        | 10 (6%)        | 4 (5%)        | 13 (4%)        | 29 (27%)       |
| 1-3                                               | 251 (23%)       | 10 (17%)      | 5 (14%)       | 11 (22%)      | 17 (31%)      | 24 (19%)       | 11 (31%)      | 7 (17%)       | 3 (10%)       | 29 (19%)       | 20 (27%)      | 73 (21%)       | 41 (38%)       |
| >3-5                                              | 277 (25%)       | 12 (21%)      | 10 (27%)      | 2 (4%)        | 17 (31%)      | 61 (49%)       | 3 (8%)        | 10 (24%)      | 9 (29%)       | 43 (28%)       | 13 (17%)      | 83 (24%)       | 14 (13%)       |
| >5                                                | 503 (45%)       | 33 (57%)      | 22 (59%)      | 32 (64%)      | 15 (28%)      | 35 (28%)       | 18 (50%)      | 21 (51%)      | 18 (58%)      | 72 (47%)       | 38 (51%)      | 175 (51%)      | 24 (22%)       |

Supplementary Table S1. Baseline and COVID-19 related characteristics of participants (continued)

|                                                                                                                                                                                                                                    | Total           | Australia     | Brazil        | Canada        | China         | France         | Italy         | Mexico        | New Zealand   | Poland         | Sweden        | Turkey         | Ukraine        |
|------------------------------------------------------------------------------------------------------------------------------------------------------------------------------------------------------------------------------------|-----------------|---------------|---------------|---------------|---------------|----------------|---------------|---------------|---------------|----------------|---------------|----------------|----------------|
| <b>Different countries and regions have been addressing the threat of Coronavirus/COVID-19 in different ways. Which of the following best describes the situation in your country/region around the time of your baby's birth?</b> |                 |               |               |               |               |                |               |               |               |                |               |                |                |
|                                                                                                                                                                                                                                    | <b>n = 1071</b> | <b>n = 58</b> | <b>n = 33</b> | <b>n = 49</b> | <b>n = 52</b> | <b>n = 118</b> | <b>n = 35</b> | <b>n = 41</b> | <b>n = 30</b> | <b>n = 151</b> | <b>n = 75</b> | <b>n = 322</b> | <b>n = 107</b> |
| No major concern                                                                                                                                                                                                                   | 49 (5%)         | 0 (0%)        | 3 (9%)        | 4 (8%)        | 14 (27%)      | 6 (5%)         | 1 (3%)        | 2 (5%)        | 0 (0%)        | 1 (1%)         | 1 (1%)        | 14 (4%)        | 3 (3%)         |
| Precautions                                                                                                                                                                                                                        | 137 (13%)       | 6 (10%)       | 2 (6%)        | 4 (8%)        | 30 (58%)      | 12 (10%)       | 2 (6%)        | 5 (12%)       | 5 (17%)       | 12 (8%)        | 5 (7%)        | 44 (14%)       | 10 (9%)        |
| Social distancing                                                                                                                                                                                                                  | 325 (30%)       | 17 (29%)      | 8 (24%)       | 14 (29%)      | 7 (13%)       | 38 (32%)       | 9 (26%)       | 7 (17%)       | 6 (20%)       | 48 (32%)       | 69 (92%)      | 80 (25%)       | 22 (21%)       |
| Lockdown                                                                                                                                                                                                                           | 438 (41%)       | 31 (53%)      | 16 (48%)      | 26 (53%)      | 1 (2%)        | 16 (14%)       | 16 (46%)      | 27 (66%)      | 18 (60%)      | 73 (48%)       | 0 (0%)        | 147 (46%)      | 67 (63%)       |
| Quarantine                                                                                                                                                                                                                         | 122 (11%)       | 4 (7%)        | 4 (12%)       | 1 (2%)        | 0 (0%)        | 46 (39%)       | 7 (20%)       | 0 (0%)        | 1 (3%)        | 17 (11%)       | 0 (0%)        | 37 (11%)       | 5 (5%)         |
| <b>Have you tested positive for Coronavirus/COVID-19?</b>                                                                                                                                                                          |                 |               |               |               |               |                |               |               |               |                |               |                |                |
|                                                                                                                                                                                                                                    | <b>n = 1084</b> | <b>n = 58</b> | <b>n = 35</b> | <b>n = 50</b> | <b>n = 53</b> | <b>n = 121</b> | <b>n = 35</b> | <b>n = 41</b> | <b>n = 31</b> | <b>n = 150</b> | <b>n = 75</b> | <b>n = 326</b> | <b>n = 109</b> |
| Yes                                                                                                                                                                                                                                | 27 (2%)         | 1 (2%)        | 1 (3%)        | 0 (0%)        | 0 (0%)        | 1 (1%)         | 1 (3%)        | 5 (12%)       | 0 (0%)        | 1 (1%)         | 4 (5%)        | 8 (2%)         | 5 (5%)         |
| No                                                                                                                                                                                                                                 | 1057 (98%)      | 57 (98%)      | 34 (97%)      | 50 (100%)     | 53 (100%)     | 120 (99%)      | 34 (97%)      | 36 (88%)      | 31 (100%)     | 149 (99%)      | 71 (95%)      | 318 (98%)      | 104 (95%)      |
| <b>Has your partner tested positive for Coronavirus/COVID-19?</b>                                                                                                                                                                  |                 |               |               |               |               |                |               |               |               |                |               |                |                |
|                                                                                                                                                                                                                                    | <b>n = 1086</b> | <b>n = 57</b> | <b>n = 35</b> | <b>n = 50</b> | <b>n = 53</b> | <b>n = 121</b> | <b>n = 36</b> | <b>n = 41</b> | <b>n = 31</b> | <b>n = 152</b> | <b>n = 75</b> | <b>n = 326</b> | <b>n = 109</b> |
| Yes                                                                                                                                                                                                                                | 25 (2%)         | 1 (2%)        | 2 (6%)        | 0 (0%)        | 0 (0%)        | 1 (1%)         | 1 (3%)        | 5 (12%)       | 0 (0%)        | 0 (0%)         | 1 (1%)        | 8 (2%)         | 6 (6%)         |
| No                                                                                                                                                                                                                                 | 1039 (96%)      | 56 (98%)      | 27 (77%)      | 50 (100%)     | 53 (100%)     | 117 (97%)      | 35 (97%)      | 36 (88%)      | 31 (100%)     | 147 (97%)      | 74 (99%)      | 312 (96%)      | 101 (93%)      |
| Don't know                                                                                                                                                                                                                         | 22 (2%)         | 0 (0%)        | 6 (17%)       | 0 (0%)        | 0 (0%)        | 3 (2%)         | 0 (0%)        | 0 (0%)        | 0 (0%)        | 5 (3%)         | 0 (0%)        | 6 (2%)         | 2 (2%)         |
| <b>Has your baby tested positive for Coronavirus/COVID-19?</b>                                                                                                                                                                     |                 |               |               |               |               |                |               |               |               |                |               |                |                |
|                                                                                                                                                                                                                                    | <b>n = 1087</b> | <b>n = 58</b> | <b>n = 35</b> | <b>n = 50</b> | <b>n = 53</b> | <b>n = 121</b> | <b>n = 36</b> | <b>n = 41</b> | <b>n = 31</b> | <b>n = 152</b> | <b>n = 75</b> | <b>n = 326</b> | <b>n = 109</b> |
| Yes                                                                                                                                                                                                                                | 5 (0%)          | 1 (2%)        | 0 (0%)        | 0 (0%)        | 0 (0%)        | 0 (0%)         | 1 (3%)        | 1 (2%)        | 0 (0%)        | 0 (0%)         | 0 (0%)        | 1 (0%)         | 1 (1%)         |
| No                                                                                                                                                                                                                                 | 1035 (95%)      | 57 (98%)      | 31 (89%)      | 50 (100%)     | 50 (94%)      | 113 (93%)      | 35 (97%)      | 39 (95%)      | 31 (100%)     | 145 (95%)      | 74 (99%)      | 303 (93%)      | 107 (98%)      |
| Don't know                                                                                                                                                                                                                         | 47 (4%)         | 0 (0%)        | 4 (11%)       | 0 (0%)        | 3 (6%)        | 8 (7%)         | 0 (0%)        | 1 (2%)        | 0 (0%)        | 7 (5%)         | 1 (1%)        | 22 (7%)        | 1 (1%)         |

Supplementary Table S2. Country demographics and COVID-19 related characteristics

| Country     | GDP per capita [1] | Preterm birth rate (%) [2] | Female educational attainment at least completed upper secondary (%) (cumulative) [3] | Maternal mortality per 100,000 live births [4] | Under-5 mortality rate per 1,000 live births [5] | % of population using safely managed sanitation services [6] | Cumulative COVID-19 cases per 1 million population as of 29 November 2020 [7] | Average government response stringency index between 1 August and 29 November 2020 [8] |
|-------------|--------------------|----------------------------|---------------------------------------------------------------------------------------|------------------------------------------------|--------------------------------------------------|--------------------------------------------------------------|-------------------------------------------------------------------------------|----------------------------------------------------------------------------------------|
| Australia   | 51,812.2           | 8.6                        | 79.1 (2020)                                                                           | 6                                              | 4                                                | 74                                                           | 1,094                                                                         | 66.21                                                                                  |
| Brazil      | 6,796.8            | 11.18                      | 49.5 (2018)                                                                           | 60                                             | 14                                               | 49                                                           | 29,349                                                                        | 65.28                                                                                  |
| Canada      | 43,258.2           | 8.15                       | 84.9 (2016)                                                                           | 10                                             | 5                                                | 84                                                           | 9,514                                                                         | 68.98                                                                                  |
| China       | 10,500.4           | 6.94                       | 19.2 (2010)                                                                           | 29                                             | 8                                                | 70                                                           | 63                                                                            | 80.09                                                                                  |
| France      | 39,030.4           | 8.42                       | 70.0 (2019)                                                                           | 8                                              | 5                                                | 79                                                           | 33,242                                                                        | 60.65                                                                                  |
| Italy       | 31,676.2           | 7.79                       | 51.8 (2020)                                                                           | 2                                              | 3                                                | 96                                                           | 25,876                                                                        | 73.61                                                                                  |
| Mexico      | 8,346.7            | 7.04                       | 37.7 (2020)                                                                           | 33                                             | 14                                               | 57                                                           | 8,459                                                                         | 71.30                                                                                  |
| New Zealand | 41,477.9           | 7.47                       | 74.6 (2020)                                                                           | 9                                              | 5                                                | 82                                                           | 352                                                                           | 22.22                                                                                  |
| Poland      | 15,656.2           | 7.25                       | 85.9 (2020)                                                                           | 2                                              | 4                                                | 91                                                           | 25,725                                                                        | 57.41                                                                                  |
| Sweden      | 52,259.3           | 6.31                       | 77.2 (2019)                                                                           | 4                                              | 3                                                | 95                                                           | 24,074                                                                        | 62.04                                                                                  |
| Turkey      | 8,538.2            | 12.41                      | 36.0 (2019)                                                                           | 17                                             | 10                                               | 78                                                           | 5,785                                                                         | 54.40                                                                                  |
| Ukraine     | 3,726.9            | 8.72                       | 71.1 (2001)                                                                           | 19                                             | 8                                                | 72                                                           | 16,525                                                                        | 55.09                                                                                  |

**Note:** Average government response stringency index is a score from 0 (no restrictions) to 100 (maximal restrictions) related to the severity of restrictions in the country [8]

#### References in the table:

1. The World Bank. GDP per capita (current US\$). 2020 [cited 2021 Dec 1]. Available from: [https://data.worldbank.org/indicator/NY.GDP.PCAP.CD?name\\_desc=false](https://data.worldbank.org/indicator/NY.GDP.PCAP.CD?name_desc=false)
2. Chawanpaiboon S, Vogel JP, Moller A-B, Lumbiganon P, Petzold M, Hogan D, et al. Global, regional, and national estimates of levels of preterm birth in 2014: a systematic review and modelling analysis. *The Lancet Global Health*. 2019 Jan;7(1):e37–46.
3. UNESCO Institute for Statistics & The World Bank. Educational attainment, at least completed upper secondary, population 25+, total (%) (cumulative)E. 2021 [cited 2021 Dec 1]. Available from: <https://data.worldbank.org/indicator/SE.SEC.CUAT.UP.ZS>
4. World Health Organization. Trends in maternal mortality 2000 to 2017: estimates by WHO, UNICEF, UNFPA, World Bank Group and the United Nations Population Division. Geneva: World Health Organization; 2019 [cited 2021 Nov 26]. 104 p. Available from: <https://apps.who.int/iris/handle/10665/327595>
5. United Nations Inter-agency Group for Child Mortality Estimation. Subnational Under-five Mortality Estimates, 1990–2019: Estimates developed by the United Nations Inter-agency Group for Child Mortality Estimation. United Nations Children’s Fund, New York; 2021.
6. WHO/UNICEF Joint Monitoring Programme. Population using safely managed sanitation services (%). 2021 [cited 2021 Dec 1]. Available from: [https://www.who.int/data/gho/data/indicators/indicator-details/GHO/population-using-safely-managed-sanitation-services\(-\)](https://www.who.int/data/gho/data/indicators/indicator-details/GHO/population-using-safely-managed-sanitation-services(-))
7. World Health Organization. COVID-19 Weekly Epidemiological Update - 29 November 2020. WHO: Geneva, Switzerland; 2020 [cited 2021 Jun 28]. Available from: <https://www.who.int/publications/m/item/weekly-epidemiological-update---1-december-2020>
8. Hale T, Angrist N, Goldszmidt R, Kira B, Petherick A, Phillips T, et al. A global panel database of pandemic policies (Oxford COVID-19 Government Response Tracker). *Nat Hum Behav*. 2021 Apr;5(4):529–38.



Supplementary Table S3. Prenatal care and birth

|                                                                                                                                             | Total           | Australia     | Brazil        | Canada        | China         | France         | Italy         | Mexico        | New Zealand   | Poland         | Sweden        | Turkey         | Ukraine        |
|---------------------------------------------------------------------------------------------------------------------------------------------|-----------------|---------------|---------------|---------------|---------------|----------------|---------------|---------------|---------------|----------------|---------------|----------------|----------------|
| <b>How was the timing of pregnancy-related appointments affected, if at all, by Coronavirus/Covid-19?</b>                                   |                 |               |               |               |               |                |               |               |               |                |               |                |                |
|                                                                                                                                             | <b>n = 1045</b> | <b>n = 56</b> | <b>n = 33</b> | <b>n = 48</b> | <b>n = 51</b> | <b>n = 118</b> | <b>n = 35</b> | <b>n = 38</b> | <b>n = 31</b> | <b>n = 147</b> | <b>n = 75</b> | <b>n = 308</b> | <b>n = 105</b> |
| It was done as usual                                                                                                                        | 117 (11%)       | 7 (13%)       | 3 (9%)        | 7 (15%)       | 1 (2%)        | 8 (7%)         | 4 (11%)       | 4 (11%)       | 2 (6%)        | 12 (8%)        | 24 (32%)      | 40 (13%)       | 5 (5%)         |
| No appointments took place                                                                                                                  | 510 (49%)       | 23 (41%)      | 21 (64%)      | 22 (46%)      | 49 (96%)      | 70 (59%)       | 20 (57%)      | 10 (26%)      | 3 (10%)       | 75 (51%)       | 30 (40%)      | 147 (48%)      | 40 (38%)       |
| Fewer appointments took place                                                                                                               | 47 (4%)         | 0 (0%)        | 2 (6%)        | 1 (2%)        | 0 (0%)        | 10 (8%)        | 1 (3%)        | 4 (11%)       | 2 (6%)        | 9 (6%)         | 3 (4%)        | 8 (3%)         | 7 (7%)         |
| Other                                                                                                                                       | 371 (36%)       | 26 (46%)      | 7 (21%)       | 18 (38%)      | 1 (2%)        | 30 (25%)       | 10 (29%)      | 20 (53%)      | 24 (77%)      | 51 (35%)       | 18 (24%)      | 113 (37%)      | 53 (50%)       |
| <b>If you were permitted to have another person present with you during birth, for how long was this person permitted to stay with you?</b> |                 |               |               |               |               |                |               |               |               |                |               |                |                |
|                                                                                                                                             | <b>n = 481</b>  | <b>n = 51</b> | <b>n = 24</b> | <b>n = 44</b> | <b>n = 20</b> | <b>n = 85</b>  | <b>n = 18</b> | <b>n = 6</b>  | <b>n = 29</b> | <b>n = 14</b>  | <b>n = 71</b> | <b>n = 96</b>  | <b>n = 23</b>  |
| For the entire labour                                                                                                                       | 367 (76%)       | 46 (90%)      | 23 (96%)      | 38 (86%)      | 17 (85%)      | 67 (79%)       | 7 (39%)       | 1 (17%)       | 25 (86%)      | 9 (64%)        | 59 (83%)      | 60 (63%)       | 15 (65%)       |
| For a part of it                                                                                                                            | 114 (24%)       | 5 (10%)       | 1 (4%)        | 6 (14%)       | 3 (15%)       | 18 (21%)       | 11 (61%)      | 5 (83%)       | 4 (14%)       | 5 (36%)        | 12 (17%)      | 36 (38%)       | 8 (35%)        |

Supplementary Table S4. Presence with the newborn

|                                                                                                                                       | Total              | Australia        | Brazil           | Canada           | China            | France            | Italy            | Mexico           | New Zealand      | Poland            | Sweden            | Turkey            | Ukraine           |
|---------------------------------------------------------------------------------------------------------------------------------------|--------------------|------------------|------------------|------------------|------------------|-------------------|------------------|------------------|------------------|-------------------|-------------------|-------------------|-------------------|
| <b>Were you permitted to touch your baby in the incubator or bed?</b>                                                                 |                    |                  |                  |                  |                  |                   |                  |                  |                  |                   |                   |                   |                   |
|                                                                                                                                       | <b>n = 1047</b>    | <b>n = 56</b>    | <b>n = 33</b>    | <b>n = 49</b>    | <b>n = 52</b>    | <b>n = 118</b>    | <b>n = 35</b>    | <b>n = 38</b>    | <b>n = 31</b>    | <b>n = 147</b>    | <b>n = 75</b>     | <b>n = 308</b>    | <b>n = 105</b>    |
| Yes                                                                                                                                   | 754 (72%)          | 55 (98%)         | 33 (100%)        | 49 (100%)        | 4 (8%)           | 116 (98%)         | 32 (91%)         | 31 (82%)         | 31 (100%)        | 119 (81%)         | 74 (99%)          | 124 (40%)         | 86 (82%)          |
| No                                                                                                                                    | 293 (28%)          | 1 (2%)           | 0 (0%)           | 0 (0%)           | 48 (92%)         | 2 (2%)            | 3 (9%)           | 7 (18%)          | 0 (0%)           | 28 (19%)          | 1 (1%)            | 184 (60%)         | 19 (18%)          |
| <b>How often were you permitted to touch your baby in the incubator or bed?</b>                                                       |                    |                  |                  |                  |                  |                   |                  |                  |                  |                   |                   |                   |                   |
|                                                                                                                                       | <b>n = 1046</b>    | <b>n = 56</b>    | <b>n = 34</b>    | <b>n = 49</b>    | <b>n = 52</b>    | <b>n = 118</b>    | <b>n = 35</b>    | <b>n = 38</b>    | <b>n = 31</b>    | <b>n = 146</b>    | <b>n = 74</b>     | <b>n = 308</b>    | <b>n = 105</b>    |
| As often as I wanted                                                                                                                  | 491 (47%)          | 46 (82%)         | 29 (85%)         | 42 (86%)         | 0 (0%)           | 110 (93%)         | 20 (57%)         | 5 (13%)          | 31 (100%)        | 54 (37%)          | 72 (97%)          | 20 (6%)           | 62 (59%)          |
| At least once per day                                                                                                                 | 174 (17%)          | 9 (16%)          | 5 (15%)          | 7 (14%)          | 2 (4%)           | 6 (5%)            | 11 (31%)         | 20 (53%)         | 0 (0%)           | 33 (23%)          | 2 (3%)            | 57 (19%)          | 22 (21%)          |
| At least once per week                                                                                                                | 43 (4%)            | 1 (2%)           | 0 (0%)           | 0 (0%)           | 0 (0%)           | 0 (0%)            | 0 (0%)           | 3 (8%)           | 0 (0%)           | 15 (10%)          | 0 (0%)            | 24 (8%)           | 0 (0%)            |
| Less than once per week                                                                                                               | 73 (7%)            | 0 (0%)           | 0 (0%)           | 0 (0%)           | 2 (4%)           | 0 (0%)            | 2 (6%)           | 3 (8%)           | 0 (0%)           | 22 (15%)          | 0 (0%)            | 37 (12%)          | 7 (7%)            |
| Not so far                                                                                                                            | 265 (25%)          | 0 (0%)           | 0 (0%)           | 0 (0%)           | 48 (92%)         | 2 (2%)            | 2 (6%)           | 7 (18%)          | 0 (0%)           | 22 (15%)          | 0 (0%)            | 170 (55%)         | 14 (13%)          |
| <b>Were sleeping facilities provided so you could stay with the baby (24/7)?</b>                                                      |                    |                  |                  |                  |                  |                   |                  |                  |                  |                   |                   |                   |                   |
|                                                                                                                                       | <b>n = 984</b>     | <b>n = 55</b>    | <b>n = 33</b>    | <b>n = 48</b>    | <b>n = 51</b>    | <b>n = 110</b>    | <b>n = 34</b>    | <b>n = 37</b>    | <b>n = 31</b>    | <b>n = 129</b>    | <b>n = 74</b>     | <b>n = 286</b>    | <b>n = 96</b>     |
| Yes, sleeping facilities were provided next to my baby in the unit                                                                    | 179 (18%)          | 5 (9%)           | 4 (12%)          | 15 (31%)         | 5 (10%)          | 49 (45%)          | 4 (12%)          | 0 (0%)           | 1 (3%)           | 18 (14%)          | 41 (55%)          | 11 (4%)           | 26 (27%)          |
| Yes, sleeping facilities were provided outside the unit (e.g. in an apartment house nearby, in another unit)                          | 125 (13%)          | 5 (9%)           | 0 (0%)           | 6 (13%)          | 2 (4%)           | 8 (7%)            | 9 (26%)          | 0 (0%)           | 4 (13%)          | 18 (14%)          | 30 (41%)          | 11 (4%)           | 32 (33%)          |
| No, sleeping facilities were not provided                                                                                             | 680 (69%)          | 45 (82%)         | 29 (88%)         | 27 (56%)         | 44 (86%)         | 53 (48%)          | 21 (62%)         | 37 (100%)        | 26 (84%)         | 93 (72%)          | 3 (4%)            | 264 (92%)         | 38 (40%)          |
| <b>Which alternatives to being present were provided with your baby receiving special/intensive care? (multiple answers possible)</b> |                    |                  |                  |                  |                  |                   |                  |                  |                  |                   |                   |                   |                   |
|                                                                                                                                       | <b>n = 982</b>     | <b>n = 55</b>    | <b>n = 34</b>    | <b>n = 48</b>    | <b>n = 51</b>    | <b>n = 109</b>    | <b>n = 34</b>    | <b>n = 37</b>    | <b>n = 29</b>    | <b>n = 130</b>    | <b>n = 72</b>     | <b>n = 287</b>    | <b>n = 96</b>     |
| <b>Sum of multiple answers</b>                                                                                                        | <b>1122 (114%)</b> | <b>57 (104%)</b> | <b>39 (115%)</b> | <b>63 (131%)</b> | <b>59 (116%)</b> | <b>123 (113%)</b> | <b>35 (103%)</b> | <b>38 (103%)</b> | <b>30 (103%)</b> | <b>155 (119%)</b> | <b>100 (139%)</b> | <b>318 (111%)</b> | <b>105 (109%)</b> |
| Photos                                                                                                                                | 309 (32%)          | 6 (11%)          | 12 (35%)         | 12 (25%)         | 14 (27%)         | 28 (26%)          | 10 (29%)         | 5 (14%)          | 4 (14%)          | 69 (53%)          | 22 (31%)          | 114 (40%)         | 13 (14%)          |
| Livestream                                                                                                                            | 42 (4%)            | 6 (11%)          | 1 (3%)           | 5 (10%)          | 4 (8%)           | 1 (1%)            | 0 (0%)           | 1 (3%)           | 0 (0%)           | 16 (12%)          | 6 (8%)            | 0 (0%)            | 2 (2%)            |
| Recorded video                                                                                                                        | 74 (8%)            | 0 (0%)           | 2 (6%)           | 6 (13%)          | 3 (6%)           | 3 (3%)            | 1 (3%)           | 0 (0%)           | 0 (0%)           | 16 (12%)          | 12 (17%)          | 24 (8%)           | 7 (7%)            |
| Video calls                                                                                                                           | 52 (5%)            | 2 (4%)           | 2 (6%)           | 9 (19%)          | 1 (2%)           | 6 (6%)            | 1 (3%)           | 1 (3%)           | 5 (17%)          | 5 (4%)            | 14 (19%)          | 5 (2%)            | 1 (1%)            |
| None                                                                                                                                  | 542 (55%)          | 39 (71%)         | 19 (56%)         | 23 (48%)         | 26 (51%)         | 64 (59%)          | 20 (59%)         | 29 (78%)         | 20 (69%)         | 35 (27%)          | 30 (42%)          | 159 (55%)         | 78 (81%)          |
| Other                                                                                                                                 | 103 (11%)          | 4 (7%)           | 3 (9%)           | 8 (17%)          | 11 (22%)         | 21 (19%)          | 3 (9%)           | 2 (5%)           | 1 (3%)           | 14 (11%)          | 16 (22%)          | 16 (6%)           | 4 (4%)            |

Supplementary Table S5. 95% confidence interval of questions related to presence with the newborn and skin-to-skin care

|                                                                                                                                                                                                                                                                           | Total      | Australia   | Brazil      | Canada     | China       | France      | Italy       | Mexico      | New Zealand | Poland     | Sweden      | Turkey     | Ukraine    |
|---------------------------------------------------------------------------------------------------------------------------------------------------------------------------------------------------------------------------------------------------------------------------|------------|-------------|-------------|------------|-------------|-------------|-------------|-------------|-------------|------------|-------------|------------|------------|
| <b>Do you know if the Coronavirus/COVID-19 situation affected the facility policy around your ability to be present with the baby receiving special/intensive care?</b>                                                                                                   |            |             |             |            |             |             |             |             |             |            |             |            |            |
|                                                                                                                                                                                                                                                                           | n = 991    | n = 55      | n = 34      | n = 49     | n = 52      | n = 110     | n = 34      | n = 37      | n = 31      | n = 132    | n = 73      | n = 288    | n = 96     |
| Restrictions were implemented                                                                                                                                                                                                                                             | 0.80; 0.85 | 0.69; 0.91  | 0.77; 0.99  | 0.81; 0.98 | 0.57; 0.82  | 0.79; 0.92  | 0.66; 0.93  | 0.83; 1.01  | 0.67; 0.95  | 0.84; 0.95 | 0.49; 0.71  | 0.79; 0.88 | 0.75; 0.90 |
| <b>Could more than one person be present with the baby at the same time?</b>                                                                                                                                                                                              |            |             |             |            |             |             |             |             |             |            |             |            |            |
|                                                                                                                                                                                                                                                                           | n = 990    | n = 55      | n = 34      | n = 49     | n = 52      | n = 110     | n = 34      | n = 37      | n = 31      | n = 130    | n = 74      | n = 288    | n = 96     |
| Yes                                                                                                                                                                                                                                                                       | 0.30; 0.36 | 0.43; 0.69  | 0.12; 0.41  | 0.27; 0.55 | 0.38; 0.66  | 0.55; 0.73  | -0.02; 0.14 | -0.02; 0.13 | 0.34; 0.69  | 0.01; 0.07 | 0.75; 0.92  | 0.18; 0.28 | 0.09; 0.24 |
| <b>How long were you allowed to see your baby per visit?</b>                                                                                                                                                                                                              |            |             |             |            |             |             |             |             |             |            |             |            |            |
|                                                                                                                                                                                                                                                                           | n = 989    | n = 55      | n = 34      | n = 49     | n = 52      | n = 109     | n = 34      | n = 37      | n = 31      | n = 131    | n = 73      | n = 288    | n = 96     |
| Not at all                                                                                                                                                                                                                                                                | 0.18; 0.23 | n.a.        | -0.03; 0.09 | n.a.       | 0.77; 0.96  | -0.01; 0.03 | -0.02; 0.14 | 0.01; 0.21  | n.a.        | 0.18; 0.33 | -0.01; 0.04 | 0.28; 0.39 | 0.08; 0.22 |
| <b>Do you feel that the measures that were implemented due to Coronavirus/COVID-19 (e.g. restrictions by hospital management) made it more difficult for you to be present with your baby?</b>                                                                            |            |             |             |            |             |             |             |             |             |            |             |            |            |
|                                                                                                                                                                                                                                                                           | n = 990    | n = 55      | n = 34      | n = 48     | n = 51      | n = 110     | n = 34      | n = 37      | n = 31      | n = 132    | n = 74      | n = 288    | n = 96     |
| Yes                                                                                                                                                                                                                                                                       | 0.71; 0.76 | 0.47; 0.73  | 0.36; 0.70  | 0.65; 0.89 | 0.65; 0.88  | 0.46; 0.65  | 0.39; 0.73  | 0.87; 1.02  | 0.48; 0.81  | 0.79; 0.91 | 0.1; 0.28   | 0.88; 0.95 | 0.7; 0.86  |
| <b>Do you feel that the measures that were implemented due to Coronavirus/COVID-19 (e.g. restrictions by hospital management) made it more difficult for you to be interactive with your baby (e.g. skin-to-skin contact or being involved in the care of your baby)?</b> |            |             |             |            |             |             |             |             |             |            |             |            |            |
|                                                                                                                                                                                                                                                                           | n = 989    | n = 55      | n = 34      | n = 49     | n = 51      | n = 110     | n = 34      | n = 37      | n = 31      | n = 132    | n = 74      | n = 286    | n = 96     |
| Yes                                                                                                                                                                                                                                                                       | 0.61; 0.67 | 0.12; 0.35  | 0.27; 0.61  | 0.41; 0.69 | 0.63; 0.86  | 0.28; 0.46  | 0.45; 0.78  | 0.92; 1.03  | 0.13; 0.45  | 0.74; 0.87 | 0.05; 0.20  | 0.90; 0.96 | 0.45; 0.65 |
| <b>When was skin-to-skin contact with your baby and one of the parents initiated (e.g. holding the baby on the chest, kangaroo mother care)?</b>                                                                                                                          |            |             |             |            |             |             |             |             |             |            |             |            |            |
|                                                                                                                                                                                                                                                                           | n = 1044   | n = 56      | n = 33      | n = 49     | n = 52      | n = 117     | n = 35      | n = 38      | n = 31      | n = 146    | n = 75      | n = 308    | n = 104    |
| Not during the time in the hospital if discharged                                                                                                                                                                                                                         | 0.21; 0.26 | n.a.        | -0.03; 0.09 | n.a.       | -0.01; 0.09 | -0.01; 0.03 | 0.07; 0.33  | 0.31; 0.63  | n.a.        | 0.25; 0.40 | n.a.        | 0.43; 0.55 | 0.08; 0.22 |
| <b>How often were you permitted to have skin-to-skin contact (kangaroo mother care) with your baby?</b>                                                                                                                                                                   |            |             |             |            |             |             |             |             |             |            |             |            |            |
|                                                                                                                                                                                                                                                                           | n = 1043   | n = 56      | n = 32      | n = 49     | n = 52      | n = 118     | n = 34      | n = 38      | n = 31      | n = 146    | n = 75      | n = 308    | n = 104    |
| As often as I wanted                                                                                                                                                                                                                                                      | 0.26; 0.32 | 0.20; 0.44  | 0.27; 0.61  | 0.37; 0.65 | n.a.        | 0.77; 0.91  | 0.09; 0.38  | n.a.        | 0.34; 0.69  | 0.04; 0.13 | 0.76; 0.92  | 0.01; 0.06 | 0.25; 0.44 |
| <b>Did medical/nursing staff involve you in the care of your baby (e.g. nappy changing, feeding, temperature taking)?</b>                                                                                                                                                 |            |             |             |            |             |             |             |             |             |            |             |            |            |
|                                                                                                                                                                                                                                                                           | n = 989    | n = 55      | n = 34      | n = 49     | n = 51      | n = 110     | n = 34      | n = 37      | n = 31      | n = 131    | n = 74      | n = 287    | n = 96     |
| No, not at all                                                                                                                                                                                                                                                            | 0.34; 0.40 | -0.02; 0.05 | 0.12; 0.41  | n.a.       | 0.67; 0.90  | -0.01; 0.03 | -0.02; 0.14 | 0.38; 0.70  | n.a.        | 0.32; 0.49 | n.a.        | 0.68; 0.79 | 0.19; 0.37 |
| <b>Did medical/nursing staff involve your partner in the care of your baby?</b>                                                                                                                                                                                           |            |             |             |            |             |             |             |             |             |            |             |            |            |
|                                                                                                                                                                                                                                                                           | n = 990    | n = 55      | n = 34      | n = 49     | n = 51      | n = 110     | n = 34      | n = 37      | n = 31      | n = 131    | n = 74      | n = 288    | n = 96     |
| No, not at all                                                                                                                                                                                                                                                            | 0.54; 0.60 | -0.02; 0.05 | 0.39; 0.73  | 0.03; 0.21 | 0.65; 0.88  | 0.01; 0.10  | 0.05; 0.30  | 0.49; 0.80  | 0.03; 0.29  | 0.81; 0.93 | 0.00; 0.09  | 0.88; 0.95 | 0.77; 0.92 |

Supplementary Table S6. Information on breastfeeding/nutrition

|                                                                                                                          | Total              | Australia        | Brazil           | Canada           | China            | France            | Italy            | Mexico           | New Zealand      | Poland            | Sweden            | Turkey            | Ukraine           |
|--------------------------------------------------------------------------------------------------------------------------|--------------------|------------------|------------------|------------------|------------------|-------------------|------------------|------------------|------------------|-------------------|-------------------|-------------------|-------------------|
| <b>Was initiation of breastfeeding encouraged by medical/nursing staff?</b>                                              |                    |                  |                  |                  |                  |                   |                  |                  |                  |                   |                   |                   |                   |
|                                                                                                                          | <b>n = 1024</b>    | <b>n = 55</b>    | <b>n = 34</b>    | <b>n = 49</b>    | <b>n = 51</b>    | <b>n = 115</b>    | <b>n = 34</b>    | <b>n = 38</b>    | <b>n = 31</b>    | <b>n = 140</b>    | <b>n = 75</b>     | <b>n = 299</b>    | <b>n = 103</b>    |
| Yes, highly encouraged                                                                                                   | 515 (50%)          | 48 (87%)         | 23 (68%)         | 30 (61%)         | 50 (98%)         | 78 (68%)          | 13 (38%)         | 20 (53%)         | 23 (74%)         | 52 (37%)          | 35 (47%)          | 95 (32%)          | 48 (47%)          |
| Yes, somewhat encouraged                                                                                                 | 265 (26%)          | 5 (9%)           | 6 (18%)          | 12 (24%)         | 0 (0%)           | 24 (21%)          | 9 (26%)          | 15 (39%)         | 5 (16%)          | 41 (29%)          | 31 (41%)          | 82 (27%)          | 35 (34%)          |
| No, not encouraged at all                                                                                                | 189 (18%)          | 1 (2%)           | 4 (12%)          | 5 (10%)          | 0 (0%)           | 10 (9%)           | 11 (32%)         | 3 (8%)           | 0 (0%)           | 39 (28%)          | 9 (12%)           | 89 (30%)          | 18 (17%)          |
| Don't know                                                                                                               | 55 (5%)            | 1 (2%)           | 1 (3%)           | 2 (4%)           | 1 (2%)           | 3 (3%)            | 1 (3%)           | 0 (0%)           | 3 (10%)          | 8 (6%)            | 0 (0%)            | 33 (11%)          | 2 (2%)            |
| <b>Was your baby breastfed or provided with mother's own pumped/expressed breastmilk in the first weeks after birth?</b> |                    |                  |                  |                  |                  |                   |                  |                  |                  |                   |                   |                   |                   |
|                                                                                                                          | <b>n = 1023</b>    | <b>n = 55</b>    | <b>n = 34</b>    | <b>n = 49</b>    | <b>n = 51</b>    | <b>n = 114</b>    | <b>n = 34</b>    | <b>n = 38</b>    | <b>n = 30</b>    | <b>n = 141</b>    | <b>n = 75</b>     | <b>n = 299</b>    | <b>n = 103</b>    |
| Yes, exclusively                                                                                                         | 506 (49%)          | 38 (69%)         | 14 (41%)         | 25 (51%)         | 31 (61%)         | 53 (46%)          | 15 (44%)         | 9 (24%)          | 22 (73%)         | 67 (48%)          | 24 (32%)          | 178 (60%)         | 30 (29%)          |
| Yes, partly                                                                                                              | 436 (43%)          | 16 (29%)         | 17 (50%)         | 22 (45%)         | 18 (35%)         | 46 (40%)          | 16 (47%)         | 24 (63%)         | 7 (23%)          | 54 (38%)          | 45 (60%)          | 116 (39%)         | 55 (53%)          |
| No, not at all                                                                                                           | 76 (7%)            | 1 (2%)           | 3 (9%)           | 1 (2%)           | 2 (4%)           | 14 (12%)          | 3 (9%)           | 5 (13%)          | 1 (3%)           | 18 (13%)          | 6 (8%)            | 4 (1%)            | 18 (17%)          |
| Don't know                                                                                                               | 5 (0%)             | 0 (0%)           | 0 (0%)           | 1 (2%)           | 0 (0%)           | 1 (1%)            | 0 (0%)           | 0 (0%)           | 0 (0%)           | 2 (1%)            | 0 (0%)            | 1 (0%)            | 0 (0%)            |
| <b>When did the initiation of breastfeeding or provision of mother's own pumped/expressed breastmilk take place?</b>     |                    |                  |                  |                  |                  |                   |                  |                  |                  |                   |                   |                   |                   |
|                                                                                                                          | <b>n = 1026</b>    | <b>n = 55</b>    | <b>n = 34</b>    | <b>n = 49</b>    | <b>n = 51</b>    | <b>n = 115</b>    | <b>n = 34</b>    | <b>n = 38</b>    | <b>n = 31</b>    | <b>n = 141</b>    | <b>n = 75</b>     | <b>n = 300</b>    | <b>n = 103</b>    |
| Not applicable; baby was not breastfed                                                                                   | 56 (5%)            | 1 (2%)           | 2 (6%)           | 0 (0%)           | 2 (4%)           | 12 (10%)          | 2 (6%)           | 4 (11%)          | 0 (0%)           | 19 (13%)          | 3 (4%)            | 1 (0%)            | 10 (10%)          |
| On the first day                                                                                                         | 348 (34%)          | 29 (53%)         | 5 (15%)          | 28 (57%)         | 8 (16%)          | 60 (52%)          | 10 (29%)         | 1 (3%)           | 17 (55%)         | 39 (28%)          | 23 (31%)          | 112 (37%)         | 16 (16%)          |
| After the first day but during the first week                                                                            | 409 (40%)          | 21 (38%)         | 18 (53%)         | 18 (37%)         | 34 (67%)         | 10 (9%)           | 14 (41%)         | 13 (34%)         | 9 (29%)          | 64 (45%)          | 41 (55%)          | 125 (42%)         | 42 (41%)          |
| After the first week                                                                                                     | 172 (17%)          | 4 (7%)           | 9 (26%)          | 2 (4%)           | 4 (8%)           | 26 (23%)          | 7 (21%)          | 19 (50%)         | 4 (13%)          | 13 (9%)           | 7 (9%)            | 45 (15%)          | 32 (31%)          |
| Don't know                                                                                                               | 41 (4%)            | 0 (0%)           | 0 (0%)           | 1 (2%)           | 3 (6%)           | 7 (6%)            | 1 (3%)           | 1 (3%)           | 1 (3%)           | 6 (4%)            | 1 (1%)            | 17 (6%)           | 3 (3%)            |
| <b>Were you allowed to bring expressed milk from home to the unit?</b>                                                   |                    |                  |                  |                  |                  |                   |                  |                  |                  |                   |                   |                   |                   |
|                                                                                                                          | <b>n = 1024</b>    | <b>n = 55</b>    | <b>n = 34</b>    | <b>n = 49</b>    | <b>n = 51</b>    | <b>n = 115</b>    | <b>n = 34</b>    | <b>n = 38</b>    | <b>n = 31</b>    | <b>n = 141</b>    | <b>n = 74</b>     | <b>n = 299</b>    | <b>n = 103</b>    |
| Not applicable; baby was not breastfed                                                                                   | 41 (4%)            | 1 (2%)           | 0 (0%)           | 0 (0%)           | 0 (0%)           | 12 (10%)          | 1 (3%)           | 2 (5%)           | 1 (3%)           | 7 (5%)            | 4 (5%)            | 3 (1%)            | 10 (10%)          |
| Yes                                                                                                                      | 782 (76%)          | 52 (95%)         | 8 (24%)          | 46 (94%)         | 51 (100%)        | 79 (69%)          | 30 (88%)         | 26 (68%)         | 25 (81%)         | 99 (70%)          | 46 (62%)          | 282 (94%)         | 38 (37%)          |
| No, the milk had to be expressed at the hospital                                                                         | 121 (12%)          | 1 (2%)           | 24 (71%)         | 1 (2%)           | 0 (0%)           | 16 (14%)          | 3 (9%)           | 8 (21%)          | 2 (6%)           | 11 (8%)           | 15 (20%)          | 7 (2%)            | 33 (32%)          |
| No, other                                                                                                                | 80 (8%)            | 1 (2%)           | 2 (6%)           | 2 (4%)           | 0 (0%)           | 8 (7%)            | 0 (0%)           | 2 (5%)           | 3 (10%)          | 24 (17%)          | 9 (12%)           | 7 (2%)            | 22 (21%)          |
| <b>How was your baby fed? (multiple answers possible)</b>                                                                |                    |                  |                  |                  |                  |                   |                  |                  |                  |                   |                   |                   |                   |
|                                                                                                                          | <b>n = 1027</b>    | <b>n = 55</b>    | <b>n = 34</b>    | <b>n = 49</b>    | <b>n = 52</b>    | <b>n = 115</b>    | <b>n = 34</b>    | <b>n = 38</b>    | <b>n = 31</b>    | <b>n = 141</b>    | <b>n = 75</b>     | <b>n = 300</b>    | <b>n = 103</b>    |
| <b>Sum of multiple answers</b>                                                                                           | <b>1505 (147%)</b> | <b>83 (151%)</b> | <b>57 (168%)</b> | <b>91 (186%)</b> | <b>79 (152%)</b> | <b>192 (167%)</b> | <b>57 (168%)</b> | <b>59 (155%)</b> | <b>39 (126%)</b> | <b>214 (152%)</b> | <b>122 (163%)</b> | <b>366 (122%)</b> | <b>146 (142%)</b> |
| With breastmilk (breastfeeding or pumped milk)                                                                           | 912 (89%)          | 54 (98%)         | 30 (88%)         | 48 (98%)         | 50 (96%)         | 97 (84%)          | 30 (88%)         | 32 (84%)         | 30 (97%)         | 123 (87%)         | 60 (80%)          | 286 (95%)         | 72 (70%)          |
| With donor milk                                                                                                          | 229 (22%)          | 14 (25%)         | 6 (18%)          | 29 (59%)         | 14 (27%)         | 51 (44%)          | 11 (32%)         | 2 (5%)           | 4 (13%)          | 38 (27%)          | 44 (59%)          | 4 (1%)            | 12 (12%)          |
| With formula milk                                                                                                        | 352 (34%)          | 15 (27%)         | 20 (59%)         | 14 (29%)         | 15 (29%)         | 44 (38%)          | 15 (44%)         | 25 (66%)         | 5 (16%)          | 53 (38%)          | 18 (24%)          | 68 (23%)          | 60 (58%)          |
| Don't know                                                                                                               | 12 (1%)            | 0 (0%)           | 1 (3%)           | 0 (0%)           | 0 (0%)           | 0 (0%)            | 1 (3%)           | 0 (0%)           | 0 (0%)           | 0 (0%)            | 0 (0%)            | 8 (3%)            | 2 (2%)            |

Supplementary Table S7. Information on health communication

|                                                                                                                                                                      | Total              | Australia        | Brazil           | Canada           | China            | France            | Italy            | Mexico           | New Zealand      | Poland            | Sweden            | Turkey            | Ukraine           |
|----------------------------------------------------------------------------------------------------------------------------------------------------------------------|--------------------|------------------|------------------|------------------|------------------|-------------------|------------------|------------------|------------------|-------------------|-------------------|-------------------|-------------------|
| <b>Do you feel you received or are receiving adequate general health information about your baby during the hospital stay?</b>                                       |                    |                  |                  |                  |                  |                   |                  |                  |                  |                   |                   |                   |                   |
|                                                                                                                                                                      | <b>n = 982</b>     | <b>n = 55</b>    | <b>n = 34</b>    | <b>n = 49</b>    | <b>n = 51</b>    | <b>n = 110</b>    | <b>n = 34</b>    | <b>n = 35</b>    | <b>n = 30</b>    | <b>n = 132</b>    | <b>n = 74</b>     | <b>n = 283</b>    | <b>n = 95</b>     |
| Yes, to a high degree                                                                                                                                                | 451 (46%)          | 36 (65%)         | 18 (53%)         | 29 (59%)         | 20 (39%)         | 62 (56%)          | 18 (53%)         | 13 (37%)         | 20 (67%)         | 50 (38%)          | 57 (77%)          | 96 (34%)          | 32 (34%)          |
| Yes, to some degree                                                                                                                                                  | 424 (43%)          | 15 (27%)         | 14 (41%)         | 18 (37%)         | 23 (45%)         | 37 (34%)          | 15 (44%)         | 16 (46%)         | 9 (30%)          | 60 (45%)          | 14 (19%)          | 156 (55%)         | 47 (49%)          |
| No, not at all                                                                                                                                                       | 83 (8%)            | 4 (7%)           | 1 (3%)           | 2 (4%)           | 2 (4%)           | 9 (8%)            | 1 (3%)           | 5 (14%)          | 1 (3%)           | 21 (16%)          | 3 (4%)            | 24 (8%)           | 10 (11%)          |
| Don't know                                                                                                                                                           | 9 (1%)             | 0 (0%)           | 0 (0%)           | 0 (0%)           | 1 (2%)           | 1 (1%)            | 0 (0%)           | 0 (0%)           | 0 (0%)           | 0 (0%)            | 0 (0%)            | 3 (1%)            | 4 (4%)            |
| I didn't receive any information                                                                                                                                     | 15 (2%)            | 0 (0%)           | 1 (3%)           | 0 (0%)           | 5 (10%)          | 1 (1%)            | 0 (0%)           | 1 (3%)           | 0 (0%)           | 1 (1%)            | 0 (0%)            | 4 (1%)            | 2 (2%)            |
| <b>How did you receive health information about your baby during the time your baby received or is receiving special/intensive care? (multiple answers possible)</b> |                    |                  |                  |                  |                  |                   |                  |                  |                  |                   |                   |                   |                   |
|                                                                                                                                                                      | <b>n = 982</b>     | <b>n = 55</b>    | <b>n = 34</b>    | <b>n = 49</b>    | <b>n = 52</b>    | <b>n = 110</b>    | <b>n = 34</b>    | <b>n = 35</b>    | <b>n = 30</b>    | <b>n = 132</b>    | <b>n = 74</b>     | <b>n = 282</b>    | <b>n = 95</b>     |
| <b>Sum of multiple answers</b>                                                                                                                                       | <b>1392 (142%)</b> | <b>96 (175%)</b> | <b>40 (118%)</b> | <b>96 (196%)</b> | <b>78 (150%)</b> | <b>166 (151%)</b> | <b>47 (138%)</b> | <b>40 (114%)</b> | <b>54 (180%)</b> | <b>180 (136%)</b> | <b>111 (150%)</b> | <b>359 (127%)</b> | <b>125 (132%)</b> |
| Meetings with medical/nursing staff (face to face)                                                                                                                   | 743 (76%)          | 50 (91%)         | 34 (100%)        | 46 (94%)         | 24 (46%)         | 96 (87%)          | 31 (91%)         | 28 (80%)         | 28 (93%)         | 79 (60%)          | 74 (100%)         | 164 (58%)         | 89 (94%)          |
| Meetings with medical/nursing staff (video conference)                                                                                                               | 28 (3%)            | 2 (4%)           | 0 (0%)           | 8 (16%)          | 2 (4%)           | 4 (4%)            | 1 (3%)           | 0 (0%)           | 2 (7%)           | 1 (1%)            | 4 (5%)            | 4 (1%)            | 0 (0%)            |
| Phone calls                                                                                                                                                          | 491 (50%)          | 28 (51%)         | 5 (15%)          | 28 (57%)         | 48 (92%)         | 51 (46%)          | 8 (24%)          | 7 (20%)          | 11 (37%)         | 88 (67%)          | 12 (16%)          | 178 (63%)         | 27 (28%)          |
| E-Mails                                                                                                                                                              | 8 (1%)             | 0 (0%)           | 0 (0%)           | 0 (0%)           | 0 (0%)           | 2 (2%)            | 0 (0%)           | 0 (0%)           | 0 (0%)           | 4 (3%)            | 0 (0%)            | 1 (0%)            | 1 (1%)            |
| Letters                                                                                                                                                              | 2 (0%)             | 0 (0%)           | 0 (0%)           | 0 (0%)           | 0 (0%)           | 0 (0%)            | 0 (0%)           | 0 (0%)           | 2 (7%)           | 0 (0%)            | 0 (0%)            | 0 (0%)            | 0 (0%)            |
| Information material (e.g. brochure, website)                                                                                                                        | 84 (9%)            | 13 (24%)         | 0 (0%)           | 11 (22%)         | 3 (6%)           | 9 (8%)            | 3 (9%)           | 2 (6%)           | 10 (33%)         | 5 (4%)            | 21 (28%)          | 2 (1%)            | 5 (5%)            |
| I didn't receive information                                                                                                                                         | 10 (1%)            | 0 (0%)           | 0 (0%)           | 0 (0%)           | 0 (0%)           | 1 (1%)            | 2 (6%)           | 0 (0%)           | 0 (0%)           | 1 (1%)            | 0 (0%)            | 4 (1%)            | 2 (2%)            |
| Other                                                                                                                                                                | 26 (3%)            | 3 (5%)           | 1 (3%)           | 3 (6%)           | 1 (2%)           | 3 (3%)            | 2 (6%)           | 3 (9%)           | 1 (3%)           | 2 (2%)            | 0 (0%)            | 6 (2%)            | 1 (1%)            |
| <b>How often did you receive information about your baby during the time your baby received or is receiving special/intensive care?</b>                              |                    |                  |                  |                  |                  |                   |                  |                  |                  |                   |                   |                   |                   |
|                                                                                                                                                                      | <b>n = 983</b>     | <b>n = 55</b>    | <b>n = 34</b>    | <b>n = 49</b>    | <b>n = 52</b>    | <b>n = 110</b>    | <b>n = 34</b>    | <b>n = 35</b>    | <b>n = 30</b>    | <b>n = 132</b>    | <b>n = 74</b>     | <b>n = 283</b>    | <b>n = 95</b>     |
| Multiple times per day                                                                                                                                               | 261 (27%)          | 30 (55%)         | 5 (15%)          | 23 (47%)         | 1 (2%)           | 59 (54%)          | 9 (26%)          | 5 (14%)          | 15 (50%)         | 22 (17%)          | 42 (57%)          | 28 (10%)          | 22 (23%)          |
| Once per day                                                                                                                                                         | 494 (50%)          | 19 (35%)         | 27 (79%)         | 21 (43%)         | 2 (4%)           | 40 (36%)          | 15 (44%)         | 27 (77%)         | 10 (33%)         | 72 (55%)          | 22 (30%)          | 176 (62%)         | 63 (66%)          |
| Multiple times per week                                                                                                                                              | 168 (17%)          | 4 (7%)           | 2 (6%)           | 2 (4%)           | 32 (62%)         | 6 (5%)            | 7 (21%)          | 2 (6%)           | 3 (10%)          | 34 (26%)          | 9 (12%)           | 59 (21%)          | 8 (8%)            |
| Once per week                                                                                                                                                        | 33 (3%)            | 1 (2%)           | 0 (0%)           | 0 (0%)           | 9 (17%)          | 2 (2%)            | 2 (6%)           | 0 (0%)           | 1 (3%)           | 2 (2%)            | 0 (0%)            | 15 (5%)           | 1 (1%)            |
| Less than once per week                                                                                                                                              | 13 (1%)            | 1 (2%)           | 0 (0%)           | 1 (2%)           | 3 (6%)           | 2 (2%)            | 1 (3%)           | 1 (3%)           | 0 (0%)           | 1 (1%)            | 0 (0%)            | 2 (1%)            | 1 (1%)            |
| Never                                                                                                                                                                | 8 (1%)             | 0 (0%)           | 0 (0%)           | 1 (2%)           | 2 (4%)           | 1 (1%)            | 0 (0%)           | 0 (0%)           | 0 (0%)           | 1 (1%)            | 1 (1%)            | 2 (1%)            | 0 (0%)            |
| Don't know                                                                                                                                                           | 6 (1%)             | 0 (0%)           | 0 (0%)           | 1 (2%)           | 3 (6%)           | 0 (0%)            | 0 (0%)           | 0 (0%)           | 1 (3%)           | 0 (0%)            | 0 (0%)            | 1 (0%)            | 0 (0%)            |

Supplementary Table S7. Information on health communication (continued)

|                                                                                                                                                                                                                           | Total          | Australia     | Brazil        | Canada        | China         | France         | Italy         | Mexico        | New Zealand   | Poland         | Sweden        | Turkey         | Ukraine       |
|---------------------------------------------------------------------------------------------------------------------------------------------------------------------------------------------------------------------------|----------------|---------------|---------------|---------------|---------------|----------------|---------------|---------------|---------------|----------------|---------------|----------------|---------------|
| <b>Do you feel you received or are receiving adequate information about how to protect yourself and your baby from Coronavirus/COVID-19 transmission while your baby received or is receiving special/intensive care?</b> |                |               |               |               |               |                |               |               |               |                |               |                |               |
|                                                                                                                                                                                                                           | <b>n = 983</b> | <b>n = 55</b> | <b>n = 34</b> | <b>n = 49</b> | <b>n = 52</b> | <b>n = 110</b> | <b>n = 34</b> | <b>n = 35</b> | <b>n = 30</b> | <b>n = 132</b> | <b>n = 74</b> | <b>n = 283</b> | <b>n = 95</b> |
| Yes, to a high degree                                                                                                                                                                                                     | 321 (33%)      | 22 (40%)      | 12 (35%)      | 13 (27%)      | 26 (50%)      | 43 (39%)       | 21 (62%)      | 12 (34%)      | 11 (37%)      | 30 (23%)       | 31 (42%)      | 73 (26%)       | 27 (28%)      |
| Yes, to some degree                                                                                                                                                                                                       | 334 (34%)      | 23 (42%)      | 14 (41%)      | 22 (45%)      | 15 (29%)      | 38 (35%)       | 8 (24%)       | 15 (43%)      | 12 (40%)      | 37 (28%)       | 23 (31%)      | 92 (33%)       | 35 (37%)      |
| No, not at all                                                                                                                                                                                                            | 187 (19%)      | 3 (5%)        | 4 (12%)       | 11 (22%)      | 2 (4%)        | 18 (16%)       | 3 (9%)        | 5 (14%)       | 3 (10%)       | 29 (22%)       | 14 (19%)      | 80 (28%)       | 15 (16%)      |
| Don't know                                                                                                                                                                                                                | 49 (5%)        | 2 (4%)        | 0 (0%)        | 1 (2%)        | 5 (10%)       | 2 (2%)         | 1 (3%)        | 2 (6%)        | 0 (0%)        | 15 (11%)       | 5 (7%)        | 9 (3%)         | 7 (7%)        |
| I didn't receive any information                                                                                                                                                                                          | 92 (9%)        | 5 (9%)        | 4 (12%)       | 2 (4%)        | 4 (8%)        | 9 (8%)         | 1 (3%)        | 1 (3%)        | 4 (13%)       | 21 (16%)       | 1 (1%)        | 29 (10%)       | 11 (12%)      |
| <b>Do you feel you received adequate information about Coronavirus/COVID-19 when discharged from the hospital?</b>                                                                                                        |                |               |               |               |               |                |               |               |               |                |               |                |               |
|                                                                                                                                                                                                                           | <b>n = 982</b> | <b>n = 55</b> | <b>n = 34</b> | <b>n = 49</b> | <b>n = 52</b> | <b>n = 110</b> | <b>n = 34</b> | <b>n = 35</b> | <b>n = 30</b> | <b>n = 132</b> | <b>n = 74</b> | <b>n = 282</b> | <b>n = 95</b> |
| Yes, to a high degree                                                                                                                                                                                                     | 204 (21%)      | 14 (25%)      | 6 (18%)       | 5 (10%)       | 20 (38%)      | 29 (26%)       | 14 (41%)      | 6 (17%)       | 2 (7%)        | 22 (17%)       | 18 (24%)      | 51 (18%)       | 17 (18%)      |
| Yes, to some degree                                                                                                                                                                                                       | 224 (23%)      | 16 (29%)      | 14 (41%)      | 19 (39%)      | 15 (29%)      | 21 (19%)       | 10 (29%)      | 9 (26%)       | 8 (27%)       | 15 (11%)       | 16 (22%)      | 62 (22%)       | 19 (20%)      |
| No, not at all                                                                                                                                                                                                            | 217 (22%)      | 7 (13%)       | 5 (15%)       | 12 (24%)      | 1 (2%)        | 29 (26%)       | 6 (18%)       | 10 (29%)      | 7 (23%)       | 20 (15%)       | 20 (27%)      | 77 (27%)       | 23 (24%)      |
| Don't know                                                                                                                                                                                                                | 35 (4%)        | 1 (2%)        | 0 (0%)        | 0 (0%)        | 3 (6%)        | 3 (3%)         | 0 (0%)        | 2 (6%)        | 0 (0%)        | 8 (6%)         | 2 (3%)        | 8 (3%)         | 8 (8%)        |
| I didn't receive any information                                                                                                                                                                                          | 157 (16%)      | 10 (18%)      | 4 (12%)       | 6 (12%)       | 2 (4%)        | 15 (14%)       | 2 (6%)        | 4 (11%)       | 5 (17%)       | 50 (38%)       | 8 (11%)       | 34 (12%)       | 17 (18%)      |
| No discharge yet                                                                                                                                                                                                          | 145 (15%)      | 7 (13%)       | 5 (15%)       | 7 (14%)       | 11 (21%)      | 13 (12%)       | 2 (6%)        | 4 (11%)       | 8 (27%)       | 17 (13%)       | 10 (14%)      | 50 (18%)       | 11 (12%)      |

Supplementary Table S8. Information on mental health status

|                                                                                                                                                                                      | Total              | Australia        | Brazil           | Canada           | China            | France            | Italy            | Mexico           | New Zealand      | Poland            | Sweden           | Turkey            | Ukraine           |
|--------------------------------------------------------------------------------------------------------------------------------------------------------------------------------------|--------------------|------------------|------------------|------------------|------------------|-------------------|------------------|------------------|------------------|-------------------|------------------|-------------------|-------------------|
| <b>Did you worry because of the Coronavirus/COVID-19 situation during pregnancy?</b>                                                                                                 |                    |                  |                  |                  |                  |                   |                  |                  |                  |                   |                  |                   |                   |
|                                                                                                                                                                                      | <b>n = 966</b>     | <b>n = 55</b>    | <b>n = 33</b>    | <b>n = 48</b>    | <b>n = 50</b>    | <b>n = 107</b>    | <b>n = 34</b>    | <b>n = 34</b>    | <b>n = 30</b>    | <b>n = 132</b>    | <b>n = 71</b>    | <b>n = 278</b>    | <b>n = 94</b>     |
| Yes, to a high degree                                                                                                                                                                | 459 (48%)          | 25 (45%)         | 17 (52%)         | 20 (42%)         | 9 (18%)          | 35 (33%)          | 13 (38%)         | 24 (71%)         | 11 (37%)         | 66 (50%)          | 25 (35%)         | 157 (56%)         | 57 (61%)          |
| Yes, to some degree                                                                                                                                                                  | 304 (31%)          | 19 (35%)         | 7 (21%)          | 19 (40%)         | 17 (34%)         | 44 (41%)          | 17 (50%)         | 6 (18%)          | 15 (50%)         | 39 (30%)          | 27 (38%)         | 66 (24%)          | 28 (30%)          |
| No, not at all                                                                                                                                                                       | 100 (10%)          | 5 (9%)           | 0 (0%)           | 5 (10%)          | 20 (40%)         | 11 (10%)          | 1 (3%)           | 1 (3%)           | 3 (10%)          | 11 (8%)           | 14 (20%)         | 23 (8%)           | 6 (6%)            |
| Don't know                                                                                                                                                                           | 12 (1%)            | 0 (0%)           | 0 (0%)           | 0 (0%)           | 0 (0%)           | 3 (3%)            | 1 (3%)           | 0 (0%)           | 0 (0%)           | 5 (4%)            | 0 (0%)           | 3 (1%)            | 0 (0%)            |
| Coronavirus/COVID-19 was not an issue then                                                                                                                                           | 91 (9%)            | 6 (11%)          | 9 (27%)          | 4 (8%)           | 4 (8%)           | 14 (13%)          | 2 (6%)           | 3 (9%)           | 1 (3%)           | 11 (8%)           | 5 (7%)           | 29 (10%)          | 3 (3%)            |
| <b>Did (or do) you struggle to be present with your baby who received or is receiving special care due to other obligations you have (e.g. for other children, family member/s)?</b> |                    |                  |                  |                  |                  |                   |                  |                  |                  |                   |                  |                   |                   |
|                                                                                                                                                                                      | <b>n = 966</b>     | <b>n = 55</b>    | <b>n = 33</b>    | <b>n = 48</b>    | <b>n = 51</b>    | <b>n = 107</b>    | <b>n = 34</b>    | <b>n = 34</b>    | <b>n = 30</b>    | <b>n = 131</b>    | <b>n = 72</b>    | <b>n = 278</b>    | <b>n = 93</b>     |
| Yes, to a high degree                                                                                                                                                                | 207 (21%)          | 13 (24%)         | 5 (15%)          | 12 (25%)         | 7 (14%)          | 16 (15%)          | 2 (6%)           | 13 (38%)         | 4 (13%)          | 21 (16%)          | 24 (33%)         | 70 (25%)          | 20 (22%)          |
| Yes, to some degree                                                                                                                                                                  | 261 (27%)          | 12 (22%)         | 8 (24%)          | 15 (31%)         | 12 (24%)         | 28 (26%)          | 7 (21%)          | 7 (21%)          | 12 (40%)         | 22 (17%)          | 27 (38%)         | 81 (29%)          | 30 (32%)          |
| No, not at all                                                                                                                                                                       | 440 (46%)          | 30 (55%)         | 20 (61%)         | 21 (44%)         | 27 (53%)         | 62 (58%)          | 25 (74%)         | 13 (38%)         | 14 (47%)         | 66 (50%)          | 19 (26%)         | 108 (39%)         | 35 (38%)          |
| Don't know                                                                                                                                                                           | 58 (6%)            | 0 (0%)           | 0 (0%)           | 0 (0%)           | 5 (10%)          | 1 (1%)            | 0 (0%)           | 1 (3%)           | 0 (0%)           | 22 (17%)          | 2 (3%)           | 19 (7%)           | 8 (9%)            |
| <b>What kind of support was offered? (multiple answers possible)</b>                                                                                                                 |                    |                  |                  |                  |                  |                   |                  |                  |                  |                   |                  |                   |                   |
|                                                                                                                                                                                      | <b>n = 967</b>     | <b>n = 55</b>    | <b>n = 32</b>    | <b>n = 48</b>    | <b>n = 51</b>    | <b>n = 107</b>    | <b>n = 34</b>    | <b>n = 34</b>    | <b>n = 30</b>    | <b>n = 132</b>    | <b>n = 72</b>    | <b>n = 278</b>    | <b>n = 94</b>     |
| <b>Sum of multiple answers</b>                                                                                                                                                       | <b>1239 (128%)</b> | <b>94 (171%)</b> | <b>36 (113%)</b> | <b>80 (167%)</b> | <b>84 (165%)</b> | <b>150 (140%)</b> | <b>41 (121%)</b> | <b>38 (112%)</b> | <b>41 (137%)</b> | <b>149 (113%)</b> | <b>97 (135%)</b> | <b>313 (113%)</b> | <b>116 (123%)</b> |
| Psychological counselling                                                                                                                                                            | 280 (29%)          | 18 (33%)         | 11 (34%)         | 10 (21%)         | 9 (18%)          | 87 (81%)          | 15 (44%)         | 5 (15%)          | 6 (20%)          | 46 (35%)          | 29 (40%)         | 26 (9%)           | 18 (19%)          |
| Self-help groups                                                                                                                                                                     | 30 (3%)            | 2 (4%)           | 0 (0%)           | 4 (8%)           | 3 (6%)           | 3 (3%)            | 2 (6%)           | 1 (3%)           | 1 (3%)           | 4 (3%)            | 1 (1%)           | 7 (3%)            | 2 (2%)            |
| Parent groups                                                                                                                                                                        | 133 (14%)          | 18 (33%)         | 2 (6%)           | 15 (31%)         | 26 (51%)         | 8 (7%)            | 3 (9%)           | 2 (6%)           | 5 (17%)          | 12 (9%)           | 5 (7%)           | 17 (6%)           | 20 (21%)          |
| Peer-to-peer support                                                                                                                                                                 | 101 (10%)          | 4 (7%)           | 0 (0%)           | 9 (19%)          | 23 (45%)         | 0 (0%)            | 2 (6%)           | 2 (6%)           | 3 (10%)          | 11 (8%)           | 1 (1%)           | 30 (11%)          | 16 (17%)          |
| Social worker                                                                                                                                                                        | 182 (19%)          | 42 (76%)         | 2 (6%)           | 27 (56%)         | 7 (14%)          | 33 (31%)          | 1 (3%)           | 5 (15%)          | 16 (53%)         | 0 (0%)            | 44 (61%)         | 4 (1%)            | 1 (1%)            |
| None                                                                                                                                                                                 | 462 (48%)          | 9 (16%)          | 21 (66%)         | 11 (23%)         | 9 (18%)          | 13 (12%)          | 17 (50%)         | 21 (62%)         | 8 (27%)          | 72 (55%)          | 11 (15%)         | 213 (77%)         | 57 (61%)          |
| Don't know                                                                                                                                                                           | 33 (3%)            | 1 (2%)           | 0 (0%)           | 1 (2%)           | 6 (12%)          | 2 (2%)            | 0 (0%)           | 2 (6%)           | 1 (3%)           | 3 (2%)            | 2 (3%)           | 14 (5%)           | 1 (1%)            |
| Other                                                                                                                                                                                | 18 (2%)            | 0 (0%)           | 0 (0%)           | 3 (6%)           | 1 (2%)           | 4 (4%)            | 1 (3%)           | 0 (0%)           | 1 (3%)           | 1 (1%)            | 4 (6%)           | 2 (1%)            | 1 (1%)            |



## Impact of Coronavirus/COVID-19 on special/intensive care for newborns – a parents' perspective

The Coronavirus/COVID-19 pandemic creates exceptional challenges, especially for the care of the most vulnerable groups of patients – such as sick and preterm born children. With this survey, we aim to explore parents' experiences related to these challenges as they play a crucial role in the care of their babies – not only at home but also in the hospital setting.

We therefore kindly ask you as parents of sick and preterm infants who were born during this Coronavirus/COVID-19 pandemic to participate in this survey. Please be aware that some of the questions might cause distressing reactions considering your personal situation and experience. You may of course stop your participation at any time. Completing the survey will take approx. 15 minutes.

**Ethics and data use:** EFCNI handles your data lawfully and confidentially, in accordance with the General Data Protection Regulation (GDPR). No person-related data will be stored or published. Your data will be evaluated anonymously, it will not be stored or passed on to third parties and will not be used for any other purpose than the one mentioned above. SurveyMonkey, the tool used for this survey, grants compliance with the GDPR and the Privacy Shield. In accordance with the GDPR, you have the right to information, the right to delete your data and can withdraw this declaration of consent at any time. The Ethics Committee of Maastricht UMC+ officially waived the need for ethics approval.

This survey is carried out by the Scientific Affairs Department of the European Foundation for the Care of Newborn Infants (EFCNI) ([www.efcni.org](http://www.efcni.org)) in collaboration with representatives of parent organisations, COINN (Council of International Neonatal Nurses), ESPR (European Society for Paediatric Research), NIDCAP (Newborn Individualized Developmental Care and Assessment Program), and UENPS (Union of European Neonatal & Perinatal Societies).

If you have any questions, comments or concerns regarding the study please contact: [research@efcni.org](mailto:research@efcni.org)

**Thank you for your participation and support!**

**European Foundation for the Care of Newborn Infants (EFCNI)  
and Global Alliance for Newborn Care (GLANCE)**

\* 1. I confirm to have read and understood the information provided above and consent to the use of my de-identified data.

Agree and continue

Do not agree and end survey

## Impact of Coronavirus/COVID-19 on special/intensive care for newborns – a parents' perspective

### Background information

\* 2. How are you related to the newborn baby?

- Mother
- Father
- Other
- Other parent (please specify)

\* 3. Was your baby born on 1st of Dec 2019 or after?

- Yes
- No

\* 4. Did your baby receive special/intensive care after birth (exceeding regular care for healthy babies, e.g. oxygen therapy, incubator, intravenous infusions)?

- Yes
- No

5. Which country do you currently live in?

6. What is your age?

- Younger than 20
- Between 20 and 24
- Between 25 and 29
- Between 30 and 34
- Between 35 and 39
- Between 40 and 44
- Older than 44

## Impact of Coronavirus/COVID-19 on special/intensive care for newborns – a parents' perspective

### 7. When was your baby born?

Date

Date

### 8. What week of pregnancy was your baby born at (gestational age)?

### 9. Was this a multiple pregnancy?

- Yes (Please note: when answering the following questions refer to the first-born baby of the pregnancy)
- No

### 10. How was your baby born?

- Vaginal birth
- C-section
- Both (e.g. in case of multiple pregnancy)

### 11. What was the birth weight of your baby?

- Under 1000 g (2,2 lbs)
- Between 1000 g (2,2 lbs) and 1500 g (3,3 lbs)
- More than 1500 g (3,3 lbs) and up to 2500 g (5,5 lbs)
- More than 2500 g (5,5 lbs)
- Don't know the birth weight

### 12. Does your baby still receive special/intensive care today?

- Yes
- No

1 13. How long did your baby receive special/intensive care (or until today if your baby is still receiving it)?  
2  
3

4  Under 1 week  
5

6  Between 1 to 3 weeks  
7

8  More than 3 and up to 5 weeks  
9

10  More than 5 weeks  
11  
12  
13  
14  
15  
16  
17  
18  
19  
20  
21  
22  
23  
24  
25  
26  
27  
28  
29  
30  
31  
32  
33  
34  
35  
36  
37  
38  
39  
40  
41  
42  
43  
44  
45  
46  
47  
48  
49  
50  
51  
52  
53  
54  
55  
56  
57  
58  
59  
60

## Impact of Coronavirus/COVID-19 on special/intensive care for newborns – a parents' perspective

### Coronavirus/COVID-19

14. Different countries and regions have been addressing the threat of Coronavirus/COVID-19 in different ways. Which of the following best describes the situation in your country/region around the time of your baby's birth?

- There was no major concern about Coronavirus/COVID-19 in the country/region in which I live.
- People were advised to take precautions (e.g. hand washing) but day-to-day life continued as usual.
- Social distancing was strongly encouraged (e.g. keeping a distance, avoiding public gatherings) but no lockdowns were in place.
- Lockdown had been implemented (e.g. advised to stay home except for essential activities; schools, restaurants and non-essential businesses were closed).
- Quarantine was implemented and/or people were fined for leaving their homes without authorization.
- Other (please elaborate):

15. Have you tested positive for Coronavirus/COVID-19?

- Yes
- No
- No, but suspected case (based on symptoms)

16. Has your partner tested positive for Coronavirus/COVID-19?

- Yes
- No
- No, but suspected case (based on symptoms)
- Don't know

17. Has your baby tested positive for Coronavirus/COVID-19?

- Yes
- No
- Don't know

1 18. Did you have contact with a person who tested positive for Coronavirus/COVID-19 during the 2 weeks  
2 prior to your baby's birth?

- 3  Yes  
4  
5  No  
6  
7  No, but suspected case (based on symptoms)  
8  
9  Don't know  
10  
11  
12  
13  
14  
15  
16  
17  
18  
19  
20  
21  
22  
23  
24  
25  
26  
27  
28  
29  
30  
31  
32  
33  
34  
35  
36  
37  
38  
39  
40  
41  
42  
43  
44  
45  
46  
47  
48  
49  
50  
51  
52  
53  
54  
55  
56  
57  
58  
59  
60

## Impact of Coronavirus/COVID-19 on special/intensive care for newborns – a parents' perspective

### Before and after birth

19. How was the timing of pregnancy-related appointments affected, if at all, by Coronavirus/Covid-19?

- It was done as usual.
- No appointments took place.
- Fewer appointments took place.
- Other (please explain):

20. Was another person permitted to accompany you to pregnancy-related appointments during the Coronavirus/COVID-19 phase?

- Yes
- Not to all appointments
- No, never
- Don't know
- Not applicable (e.g. no appointments took place)

21. Were you permitted to have another person present with you during birth (e.g. partner)?

- Yes
- No

22. For how long was this person permitted to stay with you?

- Not applicable; no other person was permitted to be present
- For the entire labour
- For a part of it (please elaborate):



1 23. When was skin-to-skin contact with your baby and one of the parents initiated (e.g. holding the baby on  
2 the chest, kangaroo mother care)?

- 3  
4  Immediately after birth  
5  On the first day  
6  After the first day but during the first week  
7  After the first week  
8  
9  Not so far (If you are still in the hospital with your baby)  
10  
11  Not during the time in the hospital (if you are already at home with your baby)  
12  
13  
14

15  
16 24. How often were you permitted to have skin-to-skin contact (kangaroo mother care) with your baby?

- 17  As often as I wanted  
18  At least once per day  
19  At least once per week  
20  Less than once per week  
21  Not so far  
22  
23  
24  
25  
26

27 25. Were you permitted to touch your baby in the incubator or bed?

- 28  Yes  
29  No  
30  
31  
32

33 26. How often were you permitted to touch your baby in the incubator or bed?

- 34  As often as I wanted  
35  At least once per day  
36  At least once per week  
37  Less than once per week  
38  Not so far  
39  
40  
41  
42  
43  
44  
45  
46  
47  
48  
49  
50  
51  
52  
53  
54  
55  
56  
57  
58  
59  
60

## Impact of Coronavirus/COVID-19 on special/intensive care for newborns – a parents' perspective

### Breastfeeding/nutrition

27. Was initiation of breastfeeding encouraged by medical/nursing staff?

- Yes, highly encouraged
- Yes, somewhat encouraged
- No, not encouraged at all
- Don't know

28. Was your baby breastfed or provided with mother's own pumped/expressed breastmilk in the first weeks after birth?

- Yes, exclusively
- Yes, partly
- No, not at all
- Don't know

29. When did the initiation of breastfeeding or provision of mother's own pumped/expressed breastmilk take place?

- Not applicable; baby was not breastfed
- On the first day
- After the first day but during the first week
- After the first week
- Don't know

30. Were you allowed to bring expressed milk from home to the unit?

- Not applicable; baby was not breastfed
- Yes
- No, the milk had to be expressed at the hospital
- No, other

31. How was your baby fed? (*multiple answers possible*)

- With breastmilk (breastfeeding or pumped milk)
- With donor milk
- With formula milk
- Don't know

## Impact of Coronavirus/COVID-19 on special/intensive care for newborns – a parents' perspective

### Presence with the baby receiving special/intensive care

32. Do you know if the Coronavirus/COVID-19 situation affected the facility policy around your ability to be present with the baby receiving special/intensive care?

- There were no changes
- Restrictions were implemented
- I don't know if there were changes

33. Who was allowed to be present with your baby receiving special/intensive care? (*multiple answers possible*)

- Mother
- Father/partner
- Sibling/s
- Other family members
- Friends
- No one
- I don't know

34. Could more than one person be present with the baby at the same time?

- No
- Don't know
- Yes, both parents
- Yes, other (please explain):

35. How often were you allowed to see your baby receiving special/intensive care?

- All the time, (24/7)
- Multiple times per day
- Once per day
- Multiple times per week
- Once per week
- Less than once per week
- Never

1  
2  
3  
4  
5  
6  
7  
8  
9  
10  
11  
12  
13  
14  
15  
16  
17  
18  
19  
20  
21  
22  
23  
24  
25  
26  
27  
28  
29  
30  
31  
32  
33  
34  
35  
36  
37  
38  
39  
40  
41  
42  
43  
44  
45  
46  
47  
48  
49  
50  
51  
52  
53  
54  
55  
56  
57  
58  
59  
60

36. How long were you allowed to see your baby per visit?

- Up to 15 minutes
- More than 15 minutes, up to one hour
- More than one hour, up to three hours
- More than three hours, but not unlimited
- Unlimited
- Not at all

37. Were sleeping facilities provided so you could stay with the baby (24/7)?

- Yes, sleeping facilities were provided next to my baby in the unit
- Yes, sleeping facilities were provided outside the unit (e.g. in an apartment house nearby, in another unit)
- No, sleeping facilities were not provided

38. Which alternatives to being present were provided with your baby receiving special/intensive care?

*(multiple answers possible)*

- Photos
- Livestream
- Recorded video
- Video calls
- None
- Other, please specify:

39. Do you feel that the measures that were implemented due to Coronavirus/COVID-19 (e.g. restrictions by hospital management) made it more difficult for you to be **present** with your baby?

- Yes, much more difficult
- Yes, somewhat more difficult
- No, not more difficult
- No, there were no restrictive measures in place
- Don't know

1  
2  
3  
4  
5  
6  
7  
8  
9  
10  
11  
12  
13  
14  
15  
16  
17  
18  
19  
20  
21  
22  
23  
24  
25  
26  
27  
28  
29  
30  
31  
32  
33  
34  
35  
36  
37  
38  
39  
40  
41  
42  
43  
44  
45  
46  
47  
48  
49  
50  
51  
52  
53  
54  
55  
56  
57  
58  
59  
60

40. Do you feel that the measures that were implemented due to Coronavirus/COVID-19 (e.g. restrictions by hospital management) made it more difficult for you to be **interactive** with your baby (e.g. skin-to-skin contact or being involved in the care of your baby)?

- Yes, much more difficult
- Yes, somewhat more difficult
- No, not more difficult
- No, there were no restrictive measures in place
- Don't know

41. Did medical/nursing staff involve you in the care of your baby (e.g. nappy changing, feeding, temperature taking)?

- Yes, to a high degree
- Yes, to some degree
- No, not at all
- Don't know

42. Did medical/nursing staff involve your partner in the care of your baby?

- Yes, to a high degree
- Yes, to some degree
- No, not at all
- Don't know
- I don't have a partner

## Impact of Coronavirus/COVID-19 on special/intensive care for newborns – a parents' perspective

### Communication

43. Do you feel you received or are receiving adequate general health information about your baby during the hospital stay?

- Yes, to a high degree
- Yes, to some degree
- No, not at all
- Don't know
- I didn't receive any information

44. How did you receive health information about your baby during the time your baby received or is receiving special/intensive care? (*multiple answers possible*)

- Meetings with medical/nursing staff (face to face)
- Meetings with medical/nursing staff (video conference)
- Phone calls
- E-Mails
- Letters
- Information material (e.g. brochure, website)
- I didn't receive information
- Other, please specify:

45. How often did you receive information about your baby during the time your baby received or is receiving special/intensive care?

- Multiple times per day
- Once per day
- Multiple times per week
- Once per week
- Less than once per week
- Never
- Don't know

1 46. Do you feel you received or are receiving adequate information about how to protect yourself and your  
2 baby from Coronavirus/COVID-19 transmission while your baby received or is receiving special/intensive  
3 care?  
4

- 5  Yes, to a high degree  
6  Yes, to some degree  
7  No, not at all  
8  Don't know  
9  I didn't receive any information  
10  
11  
12  
13  
14

15 47. Do you feel you received adequate information about Coronavirus/COVID-19 when discharged from  
16 the hospital?  
17

- 18  Yes, to a high degree  
19  Yes, to some degree  
20  No, not at all  
21  Don't know  
22  I didn't receive any information  
23  No discharge yet  
24  
25  
26  
27  
28  
29  
30  
31  
32  
33  
34  
35  
36  
37  
38  
39  
40  
41  
42  
43  
44  
45  
46  
47  
48  
49  
50  
51  
52  
53  
54  
55  
56  
57  
58  
59  
60



## Impact of Coronavirus/COVID-19 on special/intensive care for newborns – a parents' perspective

### Mental health and support

48. Did you worry because of the Coronavirus/COVID-19 situation during pregnancy?

- Yes, to a high degree
- Yes, to some degree
- No, not at all
- Don't know
- Coronavirus/COVID-19 was not an issue then.

49. Did/do you worry because of the Coronavirus/COVID-19 situation after the birth of your baby?

- Yes, to a high degree
- Yes, to some degree
- No, not at all
- Don't know

50. Did (or do) you struggle to be present with your baby who received or is receiving special care due to other obligations you have (e.g. for other children, family member/s)?

- Yes, to a high degree
- Yes, to some degree
- No, not at all
- Don't know

51. Do you feel you were adequately informed about mental health support (e.g. counselling, self-help/parent groups)?

- Yes, to a high degree
- Yes, to some degree
- No, not at all
- Don't know
- There was no mental health support

1 52. What kind of support was offered? (*multiple answers possible*)

2  Psychological counselling

3  Self-help groups

4  Parent groups

5  Peer-to-peer support

6  Social worker

7  None

8  Don't know

9  Other, please specify:

10  
11  
12  
13  
14  
15  
16  
17

18  
19  
20 53. Do you have anything additional to share relating to the impact of Coronavirus/COVID-19 on  
21 special/intensive care for babies?

22  
23

Impact of Coronavirus/COVID-19 on special/intensive care for newborns – a parents' perspective

Thank you very much for your interest in our study. The aim of this survey is to explore parents' experiences related to the challenges caused by the Coronavirus/COVID-19 pandemic regarding the care of sick and preterm born children receiving special/intensive care. In case you have questions or comments feel free to contact us: [research@efcni.org](mailto:research@efcni.org)

Impact of Coronavirus/COVID-19 on special/intensive care for newborns – a parents' perspective

Thank you very much for your interest and for taking part in our survey "Impact of Coronavirus/COVID-19 on special/intensive care for newborns – a parents' perspective". In case you have any questions or would like to contact us in the future, please send an email to: [research@efcni.org](mailto:research@efcni.org).

European Foundation for the Care of Newborn Infants (EFCNI): [www.efcni.org](http://www.efcni.org)

Global Alliance for Newborn Care (GLANCE): [www.glance-network.org](http://www.glance-network.org)

STROBE statement - checklist of items that should be included in reports of observational/population/cohort studies

|                              | Item No | Recommendation                                                                                                                                                                                                                                                                                                                                                                                                                                                         | Page No |
|------------------------------|---------|------------------------------------------------------------------------------------------------------------------------------------------------------------------------------------------------------------------------------------------------------------------------------------------------------------------------------------------------------------------------------------------------------------------------------------------------------------------------|---------|
| <b>Title and abstract</b>    | 1       | (a) Indicate the study's design with a commonly used term in the title or the abstract                                                                                                                                                                                                                                                                                                                                                                                 | 1-2     |
|                              |         | (b) Provide in the abstract an informative and balanced summary of what was done and what was found                                                                                                                                                                                                                                                                                                                                                                    | 2       |
| <b>Introduction</b>          |         |                                                                                                                                                                                                                                                                                                                                                                                                                                                                        |         |
| Background/rationale         | 2       | Explain the scientific background and rationale for the investigation being reported                                                                                                                                                                                                                                                                                                                                                                                   | 4       |
| Objectives                   | 3       | State specific objectives, including any prespecified hypotheses                                                                                                                                                                                                                                                                                                                                                                                                       | 4       |
| <b>Methods</b>               |         |                                                                                                                                                                                                                                                                                                                                                                                                                                                                        |         |
| Study design                 | 4       | Present key elements of study design early in the paper                                                                                                                                                                                                                                                                                                                                                                                                                | 4       |
| Setting                      | 5       | Describe the setting, locations, and relevant dates, including periods of recruitment, exposure, follow-up, and data collection                                                                                                                                                                                                                                                                                                                                        | 4-5     |
| Participants                 | 6       | (a) <i>Cohort study</i> —Give the eligibility criteria, and the sources and methods of selection of participants. Describe methods of follow-up<br><i>Case-control study</i> —Give the eligibility criteria, and the sources and methods of case ascertainment and control selection. Give the rationale for the choice of cases and controls<br><i>Cross-sectional study</i> —Give the eligibility criteria, and the sources and methods of selection of participants | 4-5     |
|                              |         | (b) <i>Cohort study</i> —For matched studies, give matching criteria and number of exposed and unexposed<br><i>Case-control study</i> —For matched studies, give matching criteria and the number of controls per case                                                                                                                                                                                                                                                 | n/a     |
| Variables                    | 7       | Clearly define all outcomes, exposures, predictors, potential confounders, and effect modifiers. Give diagnostic criteria, if applicable                                                                                                                                                                                                                                                                                                                               | 5       |
| Data sources/<br>measurement | 8*      | For each variable of interest, give sources of data and details of methods of assessment (measurement). Describe comparability of assessment methods if there is more than one group                                                                                                                                                                                                                                                                                   | 5       |
| Bias                         | 9       | Describe any efforts to address potential sources of bias                                                                                                                                                                                                                                                                                                                                                                                                              | 5       |
| Study size                   | 10      | Explain how the study size was arrived at                                                                                                                                                                                                                                                                                                                                                                                                                              | 5       |
| Quantitative variables       | 11      | Explain how quantitative variables were handled in the analyses. If applicable, describe which groupings were chosen and why                                                                                                                                                                                                                                                                                                                                           | 5       |
| Statistical methods          | 12      | (a) Describe all statistical methods, including those used to control for confounding                                                                                                                                                                                                                                                                                                                                                                                  | 5       |
|                              |         | (b) Describe any methods used to examine subgroups and interactions                                                                                                                                                                                                                                                                                                                                                                                                    | n/a     |
|                              |         | (c) Explain how missing data were addressed                                                                                                                                                                                                                                                                                                                                                                                                                            | 5       |
|                              |         | (d) <i>Cohort study</i> —If applicable, explain how loss to follow-up was addressed<br><i>Case-control study</i> —If applicable, explain how matching of cases and controls was addressed<br><i>Cross-sectional study</i> —If applicable, describe analytical methods taking account of sampling strategy                                                                                                                                                              | 5       |
|                              |         | (e) Describe any sensitivity analyses                                                                                                                                                                                                                                                                                                                                                                                                                                  | n/a     |

| <b>Results</b>           |     |                                                                                                                                                                                                              |       |
|--------------------------|-----|--------------------------------------------------------------------------------------------------------------------------------------------------------------------------------------------------------------|-------|
| Participants             | 13* | (a) Report numbers of individuals at each stage of study—eg numbers potentially eligible, examined for eligibility, confirmed eligible, included in the study, completing follow-up, and analysed            | 6     |
|                          |     | (b) Give reasons for non-participation at each stage                                                                                                                                                         | n/a   |
|                          |     | (c) Consider use of a flow diagram                                                                                                                                                                           | n/a   |
| Descriptive data         | 14* | (a) Give characteristics of study participants (eg demographic, clinical, social) and information on exposures and potential confounders                                                                     | 6     |
|                          |     | (b) Indicate number of participants with missing data for each variable of interest                                                                                                                          | 6     |
|                          |     | (c) <i>Cohort study</i> —Summarise follow-up time (eg, average and total amount)                                                                                                                             | n/a   |
| Outcome data             | 15* | <i>Cohort study</i> —Report numbers of outcome events or summary measures over time                                                                                                                          |       |
|                          |     | <i>Case-control study</i> —Report numbers in each exposure category, or summary measures of exposure                                                                                                         |       |
|                          |     | <i>Cross-sectional study</i> —Report numbers of outcome events or summary measures                                                                                                                           | 7-12  |
| Main results             | 16  | (a) Give unadjusted estimates and, if applicable, confounder-adjusted estimates and their precision (eg, 95% confidence interval). Make clear which confounders were adjusted for and why they were included | 7-12  |
|                          |     | (b) Report category boundaries when continuous variables were categorized                                                                                                                                    | n/a   |
|                          |     | (c) If relevant, consider translating estimates of relative risk into absolute risk for a meaningful time period                                                                                             | n/a   |
| Other analyses           | 17  | Report other analyses done—eg analyses of subgroups and interactions, and sensitivity analyses                                                                                                               | 7-12  |
| <b>Discussion</b>        |     |                                                                                                                                                                                                              |       |
| Key results              | 18  | Summarise key results with reference to study objectives                                                                                                                                                     | 12-14 |
| Limitations              | 19  | Discuss limitations of the study, taking into account sources of potential bias or imprecision. Discuss both direction and magnitude of any potential bias                                                   | 14    |
| Interpretation           | 20  | Give a cautious overall interpretation of results considering objectives, limitations, multiplicity of analyses, results from similar studies, and other relevant evidence                                   | 14    |
| Generalisability         | 21  | Discuss the generalisability (external validity) of the study results                                                                                                                                        | 14    |
| <b>Other information</b> |     |                                                                                                                                                                                                              |       |
| Funding                  | 22  | Give the source of funding and the role of the funders for the present study and, if applicable, for the original study on which the present article is based                                                | 15    |

\*Give information separately for cases and controls in case-control studies and, if applicable, for exposed and unexposed groups in cohort and cross-sectional studies.

**Note:** An Explanation and Elaboration article discusses each checklist item and gives methodological background and published examples of transparent reporting. The STROBE checklist is best used in conjunction with this article (freely available on the Web sites of PLoS Medicine at <http://www.plosmedicine.org/>, Annals of Internal Medicine at <http://www.annals.org/>, and Epidemiology at <http://www.epidem.com/>). Information on the STROBE Initiative is available at [www.strobe-statement.org](http://www.strobe-statement.org).
