# Supplementary material for: Parents’ experiences regarding neonatal care during the COVID-19 pandemic: country-specific findings of a multinational survey
Source: PubMed Central journal article supplement — BMJ Open. 2022 Apr 7;12(4):e056856. doi: 10.1136/bmjopen-2021-056856 (PMC8990262; doi:10.1136/bmjopen-2021-056856), 2022-04-07
Supplement: bmjopen-2021-056856supp001.pdf [file bmjopen-2021-056856supp001.pdf]

**SUPPLEMENTARY MATERIAL****Supplementary Table S1**

Title: Baseline and COVID-19 related characteristics of participants

**Supplementary Table S2**

Title: Country demographics and COVID-19 related characteristics

**Supplementary Table S3**

Title: Prenatal care and birth

**Supplementary Table S4**

Title: Presence with the newborn

**Supplementary Table S5**

Title: 95% confidence interval of questions related to presence with the newborn and skin-to-skin care

**Supplementary Table S6**

Title: Information on breastfeeding/nutrition

**Supplementary Table S7**

Title: Information on health communication

**Supplementary Table S8**

Title: Information on mental health status

**Supplementary Material S9**

Title: Survey

Supplementary Table S1. Baseline and COVID-19 related characteristics of participants

|                                                   | Total           | Australia     | Brazil        | Canada        | China         | France         | Italy         | Mexico        | New Zealand   | Poland         | Sweden        | Turkey         | Ukraine        |
|---------------------------------------------------|-----------------|---------------|---------------|---------------|---------------|----------------|---------------|---------------|---------------|----------------|---------------|----------------|----------------|
| <b>Age of respondent (years)</b>                  |                 |               |               |               |               |                |               |               |               |                |               |                |                |
|                                                   | <b>n = 1146</b> | <b>n = 58</b> | <b>n = 38</b> | <b>n = 52</b> | <b>n = 60</b> | <b>n = 125</b> | <b>n = 38</b> | <b>n = 40</b> | <b>n = 31</b> | <b>n = 160</b> | <b>n = 78</b> | <b>n = 357</b> | <b>n = 109</b> |
| <20                                               | 5 (0%)          | 1 (2%)        | 0 (0%)        | 0 (0%)        | 1 (2%)        | 1 (1%)         | 0 (0%)        | 1 (3%)        | 0 (0%)        | 0 (0%)         | 0 (0%)        | 1 (0%)         | 0 (0%)         |
| 20-29                                             | 468 (41%)       | 14 (24%)      | 15 (39%)      | 15 (29%)      | 16 (27%)      | 40 (32%)       | 2 (5%)        | 18 (45%)      | 15 (48%)      | 70 (44%)       | 24 (31%)      | 205 (57%)      | 34 (31%)       |
| 30-39                                             | 608 (53%)       | 39 (67%)      | 20 (53%)      | 30 (58%)      | 38 (63%)      | 78 (62%)       | 30 (79%)      | 18 (45%)      | 15 (48%)      | 84 (53%)       | 46 (59%)      | 136 (38%)      | 74 (68%)       |
| >40                                               | 65 (6%)         | 4 (7%)        | 3 (8%)        | 7 (13%)       | 5 (8%)        | 6 (5%)         | 6 (16%)       | 3 (8%)        | 1 (3%)        | 6 (4%)         | 8 (10%)       | 15 (4%)        | 1 (1%)         |
| <b>Gestational age at birth (weeks)</b>           |                 |               |               |               |               |                |               |               |               |                |               |                |                |
|                                                   | <b>n = 1107</b> | <b>n = 58</b> | <b>n = 37</b> | <b>n = 49</b> | <b>n = 53</b> | <b>n = 123</b> | <b>n = 36</b> | <b>n = 41</b> | <b>n = 31</b> | <b>n = 154</b> | <b>n = 75</b> | <b>n = 344</b> | <b>n = 106</b> |
| Early preterm: <28                                | 270 (24%)       | 22 (38%)      | 9 (24%)       | 15 (31%)      | 18 (34%)      | 40 (33%)       | 9 (25%)       | 4 (10%)       | 6 (19%)       | 40 (26%)       | 23 (31%)      | 67 (19%)       | 17 (16%)       |
| Very preterm: 28-<br><32                          | 389 (35%)       | 10 (17%)      | 16 (43%)      | 14 (29%)      | 29 (55%)      | 36 (29%)       | 10 (28%)      | 20 (49%)      | 7 (23%)       | 48 (31%)       | 27 (36%)      | 140 (41%)      | 32 (30%)       |
| Moderate to late<br>preterm: 32-<br><37           | 412 (37%)       | 20 (34%)      | 12 (32%)      | 20 (41%)      | 6 (11%)       | 43 (35%)       | 15 (42%)      | 15 (37%)      | 15 (48%)      | 64 (42%)       | 19 (25%)      | 131 (38%)      | 52 (49%)       |
| Term: 37-42                                       | 36 (3%)         | 6 (10%)       | 0 (0%)        | 0 (0%)        | 0 (0%)        | 4 (3%)         | 2 (6%)        | 2 (5%)        | 3 (10%)       | 2 (1%)         | 6 (8%)        | 6 (2%)         | 5 (5%)         |
| <b>Multiple pregnancy</b>                         |                 |               |               |               |               |                |               |               |               |                |               |                |                |
|                                                   | <b>n = 1112</b> | <b>n = 58</b> | <b>n = 37</b> | <b>n = 49</b> | <b>n = 54</b> | <b>n = 124</b> | <b>n = 36</b> | <b>n = 41</b> | <b>n = 31</b> | <b>n = 154</b> | <b>n = 75</b> | <b>n = 344</b> | <b>n = 109</b> |
| Yes                                               | 180 (16%)       | 12 (21%)      | 7 (19%)       | 6 (12%)       | 18 (33%)      | 14 (11%)       | 5 (14%)       | 4 (10%)       | 3 (10%)       | 14 (9%)        | 16 (21%)      | 65 (19%)       | 16 (15%)       |
| No                                                | 932 (84%)       | 46 (79%)      | 30 (81%)      | 43 (88%)      | 36 (67%)      | 110 (89%)      | 31 (86%)      | 37 (90%)      | 28 (90%)      | 140 (91%)      | 59 (79%)      | 279 (81%)      | 93 (85%)       |
| <b>Birth mode</b>                                 |                 |               |               |               |               |                |               |               |               |                |               |                |                |
|                                                   | <b>n = 1111</b> | <b>n = 58</b> | <b>n = 37</b> | <b>n = 50</b> | <b>n = 54</b> | <b>n = 124</b> | <b>n = 36</b> | <b>n = 41</b> | <b>n = 30</b> | <b>n = 153</b> | <b>n = 75</b> | <b>n = 344</b> | <b>n = 109</b> |
| Vaginal birth                                     | 301 (27%)       | 18 (31%)      | 6 (16%)       | 22 (44%)      | 24 (44%)      | 62 (50%)       | 14 (39%)      | 6 (15%)       | 6 (20%)       | 42 (27%)       | 28 (37%)      | 38 (11%)       | 35 (32%)       |
| C-section                                         | 804 (72%)       | 39 (67%)      | 31 (84%)      | 28 (56%)      | 29 (54%)      | 62 (50%)       | 21 (58%)      | 35 (85%)      | 24 (80%)      | 111 (73%)      | 47 (63%)      | 304 (88%)      | 73 (67%)       |
| Both (e.g. in case of<br>multiple pregnancy)      | 6 (1%)          | 1 (2%)        | 0 (0%)        | 0 (0%)        | 1 (2%)        | 0 (0%)         | 1 (3%)        | 0 (0%)        | 0 (0%)        | 0 (0%)         | 0 (0%)        | 2 (1%)         | 1 (1%)         |
| <b>Birth weight of the baby (grams)</b>           |                 |               |               |               |               |                |               |               |               |                |               |                |                |
|                                                   | <b>n = 1110</b> | <b>n = 58</b> | <b>n = 37</b> | <b>n = 50</b> | <b>n = 54</b> | <b>n = 124</b> | <b>n = 36</b> | <b>n = 41</b> | <b>n = 31</b> | <b>n = 154</b> | <b>n = 75</b> | <b>n = 342</b> | <b>n = 108</b> |
| <1000                                             | 290 (26%)       | 20 (34%)      | 10 (27%)      | 18 (36%)      | 15 (28%)      | 45 (36%)       | 14 (39%)      | 6 (15%)       | 8 (26%)       | 35 (23%)       | 27 (36%)      | 78 (23%)       | 14 (13%)       |
| 1000-1500                                         | 373 (34%)       | 14 (24%)      | 15 (41%)      | 11 (22%)      | 28 (52%)      | 28 (23%)       | 5 (14%)       | 18 (44%)      | 7 (23%)       | 57 (37%)       | 18 (24%)      | 130 (38%)      | 42 (39%)       |
| >1500-2500                                        | 374 (34%)       | 16 (28%)      | 12 (32%)      | 15 (30%)      | 10 (19%)      | 45 (36%)       | 16 (44%)      | 13 (32%)      | 10 (32%)      | 53 (34%)       | 19 (25%)      | 120 (35%)      | 45 (42%)       |
| >2500                                             | 71 (6%)         | 8 (14%)       | 0 (0%)        | 6 (12%)       | 1 (2%)        | 6 (5%)         | 1 (3%)        | 4 (10%)       | 6 (19%)       | 9 (6%)         | 10 (13%)      | 14 (4%)        | 6 (6%)         |
| Don't know the<br>birth weight                    | 2 (0%)          | 0 (0%)        | 0 (0%)        | 0 (0%)        | 0 (0%)        | 0 (0%)         | 0 (0%)        | 0 (0%)        | 0 (0%)        | 0 (0%)         | 1 (1%)        | 0 (0%)         | 1 (1%)         |
| <b>Duration of special/intensive care (weeks)</b> |                 |               |               |               |               |                |               |               |               |                |               |                |                |
|                                                   | <b>n = 1112</b> | <b>n = 58</b> | <b>n = 37</b> | <b>n = 50</b> | <b>n = 54</b> | <b>n = 124</b> | <b>n = 36</b> | <b>n = 41</b> | <b>n = 31</b> | <b>n = 154</b> | <b>n = 75</b> | <b>n = 344</b> | <b>n = 108</b> |
| <1                                                | 81 (7%)         | 3 (5%)        | 0 (0%)        | 5 (10%)       | 5 (9%)        | 4 (3%)         | 4 (11%)       | 3 (7%)        | 1 (3%)        | 10 (6%)        | 4 (5%)        | 13 (4%)        | 29 (27%)       |
| 1-3                                               | 251 (23%)       | 10 (17%)      | 5 (14%)       | 11 (22%)      | 17 (31%)      | 24 (19%)       | 11 (31%)      | 7 (17%)       | 3 (10%)       | 29 (19%)       | 20 (27%)      | 73 (21%)       | 41 (38%)       |
| >3-5                                              | 277 (25%)       | 12 (21%)      | 10 (27%)      | 2 (4%)        | 17 (31%)      | 61 (49%)       | 3 (8%)        | 10 (24%)      | 9 (29%)       | 43 (28%)       | 13 (17%)      | 83 (24%)       | 14 (13%)       |
| >5                                                | 503 (45%)       | 33 (57%)      | 22 (59%)      | 32 (64%)      | 15 (28%)      | 35 (28%)       | 18 (50%)      | 21 (51%)      | 18 (58%)      | 72 (47%)       | 38 (51%)      | 175 (51%)      | 24 (22%)       |

Supplementary Table S1. Baseline and COVID-19 related characteristics of participants (continued)

|                                                                                                                                                                                                                                    | Total           | Australia     | Brazil        | Canada        | China         | France         | Italy         | Mexico        | New Zealand   | Poland         | Sweden        | Turkey         | Ukraine        |
|------------------------------------------------------------------------------------------------------------------------------------------------------------------------------------------------------------------------------------|-----------------|---------------|---------------|---------------|---------------|----------------|---------------|---------------|---------------|----------------|---------------|----------------|----------------|
| <b>Different countries and regions have been addressing the threat of Coronavirus/COVID-19 in different ways. Which of the following best describes the situation in your country/region around the time of your baby's birth?</b> |                 |               |               |               |               |                |               |               |               |                |               |                |                |
|                                                                                                                                                                                                                                    | <b>n = 1071</b> | <b>n = 58</b> | <b>n = 33</b> | <b>n = 49</b> | <b>n = 52</b> | <b>n = 118</b> | <b>n = 35</b> | <b>n = 41</b> | <b>n = 30</b> | <b>n = 151</b> | <b>n = 75</b> | <b>n = 322</b> | <b>n = 107</b> |
| No major concern                                                                                                                                                                                                                   | 49 (5%)         | 0 (0%)        | 3 (9%)        | 4 (8%)        | 14 (27%)      | 6 (5%)         | 1 (3%)        | 2 (5%)        | 0 (0%)        | 1 (1%)         | 1 (1%)        | 14 (4%)        | 3 (3%)         |
| Precautions                                                                                                                                                                                                                        | 137 (13%)       | 6 (10%)       | 2 (6%)        | 4 (8%)        | 30 (58%)      | 12 (10%)       | 2 (6%)        | 5 (12%)       | 5 (17%)       | 12 (8%)        | 5 (7%)        | 44 (14%)       | 10 (9%)        |
| Social distancing                                                                                                                                                                                                                  | 325 (30%)       | 17 (29%)      | 8 (24%)       | 14 (29%)      | 7 (13%)       | 38 (32%)       | 9 (26%)       | 7 (17%)       | 6 (20%)       | 48 (32%)       | 69 (92%)      | 80 (25%)       | 22 (21%)       |
| Lockdown                                                                                                                                                                                                                           | 438 (41%)       | 31 (53%)      | 16 (48%)      | 26 (53%)      | 1 (2%)        | 16 (14%)       | 16 (46%)      | 27 (66%)      | 18 (60%)      | 73 (48%)       | 0 (0%)        | 147 (46%)      | 67 (63%)       |
| Quarantine                                                                                                                                                                                                                         | 122 (11%)       | 4 (7%)        | 4 (12%)       | 1 (2%)        | 0 (0%)        | 46 (39%)       | 7 (20%)       | 0 (0%)        | 1 (3%)        | 17 (11%)       | 0 (0%)        | 37 (11%)       | 5 (5%)         |
| <b>Have you tested positive for Coronavirus/COVID-19?</b>                                                                                                                                                                          |                 |               |               |               |               |                |               |               |               |                |               |                |                |
|                                                                                                                                                                                                                                    | <b>n = 1084</b> | <b>n = 58</b> | <b>n = 35</b> | <b>n = 50</b> | <b>n = 53</b> | <b>n = 121</b> | <b>n = 35</b> | <b>n = 41</b> | <b>n = 31</b> | <b>n = 150</b> | <b>n = 75</b> | <b>n = 326</b> | <b>n = 109</b> |
| Yes                                                                                                                                                                                                                                | 27 (2%)         | 1 (2%)        | 1 (3%)        | 0 (0%)        | 0 (0%)        | 1 (1%)         | 1 (3%)        | 5 (12%)       | 0 (0%)        | 1 (1%)         | 4 (5%)        | 8 (2%)         | 5 (5%)         |
| No                                                                                                                                                                                                                                 | 1057 (98%)      | 57 (98%)      | 34 (97%)      | 50 (100%)     | 53 (100%)     | 120 (99%)      | 34 (97%)      | 36 (88%)      | 31 (100%)     | 149 (99%)      | 71 (95%)      | 318 (98%)      | 104 (95%)      |
| <b>Has your partner tested positive for Coronavirus/COVID-19?</b>                                                                                                                                                                  |                 |               |               |               |               |                |               |               |               |                |               |                |                |
|                                                                                                                                                                                                                                    | <b>n = 1086</b> | <b>n = 57</b> | <b>n = 35</b> | <b>n = 50</b> | <b>n = 53</b> | <b>n = 121</b> | <b>n = 36</b> | <b>n = 41</b> | <b>n = 31</b> | <b>n = 152</b> | <b>n = 75</b> | <b>n = 326</b> | <b>n = 109</b> |
| Yes                                                                                                                                                                                                                                | 25 (2%)         | 1 (2%)        | 2 (6%)        | 0 (0%)        | 0 (0%)        | 1 (1%)         | 1 (3%)        | 5 (12%)       | 0 (0%)        | 0 (0%)         | 1 (1%)        | 8 (2%)         | 6 (6%)         |
| No                                                                                                                                                                                                                                 | 1039 (96%)      | 56 (98%)      | 27 (77%)      | 50 (100%)     | 53 (100%)     | 117 (97%)      | 35 (97%)      | 36 (88%)      | 31 (100%)     | 147 (97%)      | 74 (99%)      | 312 (96%)      | 101 (93%)      |
| Don't know                                                                                                                                                                                                                         | 22 (2%)         | 0 (0%)        | 6 (17%)       | 0 (0%)        | 0 (0%)        | 3 (2%)         | 0 (0%)        | 0 (0%)        | 0 (0%)        | 5 (3%)         | 0 (0%)        | 6 (2%)         | 2 (2%)         |
| <b>Has your baby tested positive for Coronavirus/COVID-19?</b>                                                                                                                                                                     |                 |               |               |               |               |                |               |               |               |                |               |                |                |
|                                                                                                                                                                                                                                    | <b>n = 1087</b> | <b>n = 58</b> | <b>n = 35</b> | <b>n = 50</b> | <b>n = 53</b> | <b>n = 121</b> | <b>n = 36</b> | <b>n = 41</b> | <b>n = 31</b> | <b>n = 152</b> | <b>n = 75</b> | <b>n = 326</b> | <b>n = 109</b> |
| Yes                                                                                                                                                                                                                                | 5 (0%)          | 1 (2%)        | 0 (0%)        | 0 (0%)        | 0 (0%)        | 0 (0%)         | 1 (3%)        | 1 (2%)        | 0 (0%)        | 0 (0%)         | 0 (0%)        | 1 (0%)         | 1 (1%)         |
| No                                                                                                                                                                                                                                 | 1035 (95%)      | 57 (98%)      | 31 (89%)      | 50 (100%)     | 50 (94%)      | 113 (93%)      | 35 (97%)      | 39 (95%)      | 31 (100%)     | 145 (95%)      | 74 (99%)      | 303 (93%)      | 107 (98%)      |
| Don't know                                                                                                                                                                                                                         | 47 (4%)         | 0 (0%)        | 4 (11%)       | 0 (0%)        | 3 (6%)        | 8 (7%)         | 0 (0%)        | 1 (2%)        | 0 (0%)        | 7 (5%)         | 1 (1%)        | 22 (7%)        | 1 (1%)         |

Supplementary Table S2. Country demographics and COVID-19 related characteristics

| Country     | GDP per capita [1] | Preterm birth rate (%) [2] | Female educational attainment at least completed upper secondary (%) (cumulative) [3] | Maternal mortality per 100,000 live births [4] | Under-5 mortality rate per 1,000 live births [5] | % of population using safely managed sanitation services [6] | Cumulative COVID-19 cases per 1 million population as of 29 November 2020 [7] | Average government response stringency index between 1 August and 29 November 2020 [8] |
|-------------|--------------------|----------------------------|---------------------------------------------------------------------------------------|------------------------------------------------|--------------------------------------------------|--------------------------------------------------------------|-------------------------------------------------------------------------------|----------------------------------------------------------------------------------------|
| Australia   | 51,812.2           | 8.6                        | 79.1 (2020)                                                                           | 6                                              | 4                                                | 74                                                           | 1,094                                                                         | 66.21                                                                                  |
| Brazil      | 6,796.8            | 11.18                      | 49.5 (2018)                                                                           | 60                                             | 14                                               | 49                                                           | 29,349                                                                        | 65.28                                                                                  |
| Canada      | 43,258.2           | 8.15                       | 84.9 (2016)                                                                           | 10                                             | 5                                                | 84                                                           | 9,514                                                                         | 68.98                                                                                  |
| China       | 10,500.4           | 6.94                       | 19.2 (2010)                                                                           | 29                                             | 8                                                | 70                                                           | 63                                                                            | 80.09                                                                                  |
| France      | 39,030.4           | 8.42                       | 70.0 (2019)                                                                           | 8                                              | 5                                                | 79                                                           | 33,242                                                                        | 60.65                                                                                  |
| Italy       | 31,676.2           | 7.79                       | 51.8 (2020)                                                                           | 2                                              | 3                                                | 96                                                           | 25,876                                                                        | 73.61                                                                                  |
| Mexico      | 8,346.7            | 7.04                       | 37.7 (2020)                                                                           | 33                                             | 14                                               | 57                                                           | 8,459                                                                         | 71.30                                                                                  |
| New Zealand | 41,477.9           | 7.47                       | 74.6 (2020)                                                                           | 9                                              | 5                                                | 82                                                           | 352                                                                           | 22.22                                                                                  |
| Poland      | 15,656.2           | 7.25                       | 85.9 (2020)                                                                           | 2                                              | 4                                                | 91                                                           | 25,725                                                                        | 57.41                                                                                  |
| Sweden      | 52,259.3           | 6.31                       | 77.2 (2019)                                                                           | 4                                              | 3                                                | 95                                                           | 24,074                                                                        | 62.04                                                                                  |
| Turkey      | 8,538.2            | 12.41                      | 36.0 (2019)                                                                           | 17                                             | 10                                               | 78                                                           | 5,785                                                                         | 54.40                                                                                  |
| Ukraine     | 3,726.9            | 8.72                       | 71.1 (2001)                                                                           | 19                                             | 8                                                | 72                                                           | 16,525                                                                        | 55.09                                                                                  |

**Note:** Average government response stringency index is a score from 0 (no restrictions) to 100 (maximal restrictions) related to the severity of restrictions in the country [8]

#### References in the table:

1. The World Bank. GDP per capita (current US\$). 2020 [cited 2021 Dec 1]. Available from: [https://data.worldbank.org/indicator/NY.GDP.PCAP.CD?name\\_desc=false](https://data.worldbank.org/indicator/NY.GDP.PCAP.CD?name_desc=false)
2. Chawanpaiboon S, Vogel JP, Moller A-B, Lumbiganon P, Petzold M, Hogan D, et al. Global, regional, and national estimates of levels of preterm birth in 2014: a systematic review and modelling analysis. *The Lancet Global Health*. 2019 Jan;7(1):e37–46.
3. UNESCO Institute for Statistics & The World Bank. Educational attainment, at least completed upper secondary, population 25+, total (%) (cumulative)E. 2021 [cited 2021 Dec 1]. Available from: <https://data.worldbank.org/indicator/SE.SEC.CUAT.UP.ZS>
4. World Health Organization. Trends in maternal mortality 2000 to 2017: estimates by WHO, UNICEF, UNFPA, World Bank Group and the United Nations Population Division. Geneva: World Health Organization; 2019 [cited 2021 Nov 26]. 104 p. Available from: <https://apps.who.int/iris/handle/10665/327595>
5. United Nations Inter-agency Group for Child Mortality Estimation. Subnational Under-five Mortality Estimates, 1990–2019: Estimates developed by the United Nations Inter-agency Group for Child Mortality Estimation. United Nations Children’s Fund, New York; 2021.
6. WHO/UNICEF Joint Monitoring Programme. Population using safely managed sanitation services (%). 2021 [cited 2021 Dec 1]. Available from: [https://www.who.int/data/gho/data/indicators/indicator-details/GHO/population-using-safely-managed-sanitation-services-\(-\)](https://www.who.int/data/gho/data/indicators/indicator-details/GHO/population-using-safely-managed-sanitation-services-(-))
7. World Health Organization. COVID-19 Weekly Epidemiological Update - 29 November 2020. WHO: Geneva, Switzerland; 2020 [cited 2021 Jun 28]. Available from: <https://www.who.int/publications/m/item/weekly-epidemiological-update---1-december-2020>
8. Hale T, Angrist N, Goldszmidt R, Kira B, Petherick A, Phillips T, et al. A global panel database of pandemic policies (Oxford COVID-19 Government Response Tracker). *Nat Hum Behav*. 2021 Apr;5(4):529–38.

Supplementary Table S3. Prenatal care and birth

|                                                                                                                                             | Total           | Australia     | Brazil        | Canada        | China         | France         | Italy         | Mexico        | New Zealand   | Poland         | Sweden        | Turkey         | Ukraine        |
|---------------------------------------------------------------------------------------------------------------------------------------------|-----------------|---------------|---------------|---------------|---------------|----------------|---------------|---------------|---------------|----------------|---------------|----------------|----------------|
| <b>How was the timing of pregnancy-related appointments affected, if at all, by Coronavirus/Covid-19?</b>                                   |                 |               |               |               |               |                |               |               |               |                |               |                |                |
|                                                                                                                                             | <b>n = 1045</b> | <b>n = 56</b> | <b>n = 33</b> | <b>n = 48</b> | <b>n = 51</b> | <b>n = 118</b> | <b>n = 35</b> | <b>n = 38</b> | <b>n = 31</b> | <b>n = 147</b> | <b>n = 75</b> | <b>n = 308</b> | <b>n = 105</b> |
| It was done as usual                                                                                                                        | 117 (11%)       | 7 (13%)       | 3 (9%)        | 7 (15%)       | 1 (2%)        | 8 (7%)         | 4 (11%)       | 4 (11%)       | 2 (6%)        | 12 (8%)        | 24 (32%)      | 40 (13%)       | 5 (5%)         |
| No appointments took place                                                                                                                  | 510 (49%)       | 23 (41%)      | 21 (64%)      | 22 (46%)      | 49 (96%)      | 70 (59%)       | 20 (57%)      | 10 (26%)      | 3 (10%)       | 75 (51%)       | 30 (40%)      | 147 (48%)      | 40 (38%)       |
| Fewer appointments took place                                                                                                               | 47 (4%)         | 0 (0%)        | 2 (6%)        | 1 (2%)        | 0 (0%)        | 10 (8%)        | 1 (3%)        | 4 (11%)       | 2 (6%)        | 9 (6%)         | 3 (4%)        | 8 (3%)         | 7 (7%)         |
| Other                                                                                                                                       | 371 (36%)       | 26 (46%)      | 7 (21%)       | 18 (38%)      | 1 (2%)        | 30 (25%)       | 10 (29%)      | 20 (53%)      | 24 (77%)      | 51 (35%)       | 18 (24%)      | 113 (37%)      | 53 (50%)       |
| <b>If you were permitted to have another person present with you during birth, for how long was this person permitted to stay with you?</b> |                 |               |               |               |               |                |               |               |               |                |               |                |                |
|                                                                                                                                             | <b>n = 481</b>  | <b>n = 51</b> | <b>n = 24</b> | <b>n = 44</b> | <b>n = 20</b> | <b>n = 85</b>  | <b>n = 18</b> | <b>n = 6</b>  | <b>n = 29</b> | <b>n = 14</b>  | <b>n = 71</b> | <b>n = 96</b>  | <b>n = 23</b>  |
| For the entire labour                                                                                                                       | 367 (76%)       | 46 (90%)      | 23 (96%)      | 38 (86%)      | 17 (85%)      | 67 (79%)       | 7 (39%)       | 1 (17%)       | 25 (86%)      | 9 (64%)        | 59 (83%)      | 60 (63%)       | 15 (65%)       |
| For a part of it                                                                                                                            | 114 (24%)       | 5 (10%)       | 1 (4%)        | 6 (14%)       | 3 (15%)       | 18 (21%)       | 11 (61%)      | 5 (83%)       | 4 (14%)       | 5 (36%)        | 12 (17%)      | 36 (38%)       | 8 (35%)        |

Supplementary Table S4. Presence with the newborn

|                                                                                                                                       | Total              | Australia        | Brazil           | Canada           | China            | France            | Italy            | Mexico           | New Zealand      | Poland            | Sweden            | Turkey            | Ukraine           |
|---------------------------------------------------------------------------------------------------------------------------------------|--------------------|------------------|------------------|------------------|------------------|-------------------|------------------|------------------|------------------|-------------------|-------------------|-------------------|-------------------|
| <b>Were you permitted to touch your baby in the incubator or bed?</b>                                                                 |                    |                  |                  |                  |                  |                   |                  |                  |                  |                   |                   |                   |                   |
|                                                                                                                                       | <b>n = 1047</b>    | <b>n = 56</b>    | <b>n = 33</b>    | <b>n = 49</b>    | <b>n = 52</b>    | <b>n = 118</b>    | <b>n = 35</b>    | <b>n = 38</b>    | <b>n = 31</b>    | <b>n = 147</b>    | <b>n = 75</b>     | <b>n = 308</b>    | <b>n = 105</b>    |
| Yes                                                                                                                                   | 754 (72%)          | 55 (98%)         | 33 (100%)        | 49 (100%)        | 4 (8%)           | 116 (98%)         | 32 (91%)         | 31 (82%)         | 31 (100%)        | 119 (81%)         | 74 (99%)          | 124 (40%)         | 86 (82%)          |
| No                                                                                                                                    | 293 (28%)          | 1 (2%)           | 0 (0%)           | 0 (0%)           | 48 (92%)         | 2 (2%)            | 3 (9%)           | 7 (18%)          | 0 (0%)           | 28 (19%)          | 1 (1%)            | 184 (60%)         | 19 (18%)          |
| <b>How often were you permitted to touch your baby in the incubator or bed?</b>                                                       |                    |                  |                  |                  |                  |                   |                  |                  |                  |                   |                   |                   |                   |
|                                                                                                                                       | <b>n = 1046</b>    | <b>n = 56</b>    | <b>n = 34</b>    | <b>n = 49</b>    | <b>n = 52</b>    | <b>n = 118</b>    | <b>n = 35</b>    | <b>n = 38</b>    | <b>n = 31</b>    | <b>n = 146</b>    | <b>n = 74</b>     | <b>n = 308</b>    | <b>n = 105</b>    |
| As often as I wanted                                                                                                                  | 491 (47%)          | 46 (82%)         | 29 (85%)         | 42 (86%)         | 0 (0%)           | 110 (93%)         | 20 (57%)         | 5 (13%)          | 31 (100%)        | 54 (37%)          | 72 (97%)          | 20 (6%)           | 62 (59%)          |
| At least once per day                                                                                                                 | 174 (17%)          | 9 (16%)          | 5 (15%)          | 7 (14%)          | 2 (4%)           | 6 (5%)            | 11 (31%)         | 20 (53%)         | 0 (0%)           | 33 (23%)          | 2 (3%)            | 57 (19%)          | 22 (21%)          |
| At least once per week                                                                                                                | 43 (4%)            | 1 (2%)           | 0 (0%)           | 0 (0%)           | 0 (0%)           | 0 (0%)            | 0 (0%)           | 3 (8%)           | 0 (0%)           | 15 (10%)          | 0 (0%)            | 24 (8%)           | 0 (0%)            |
| Less than once per week                                                                                                               | 73 (7%)            | 0 (0%)           | 0 (0%)           | 0 (0%)           | 2 (4%)           | 0 (0%)            | 2 (6%)           | 3 (8%)           | 0 (0%)           | 22 (15%)          | 0 (0%)            | 37 (12%)          | 7 (7%)            |
| Not so far                                                                                                                            | 265 (25%)          | 0 (0%)           | 0 (0%)           | 0 (0%)           | 48 (92%)         | 2 (2%)            | 2 (6%)           | 7 (18%)          | 0 (0%)           | 22 (15%)          | 0 (0%)            | 170 (55%)         | 14 (13%)          |
| <b>Were sleeping facilities provided so you could stay with the baby (24/7)?</b>                                                      |                    |                  |                  |                  |                  |                   |                  |                  |                  |                   |                   |                   |                   |
|                                                                                                                                       | <b>n = 984</b>     | <b>n = 55</b>    | <b>n = 33</b>    | <b>n = 48</b>    | <b>n = 51</b>    | <b>n = 110</b>    | <b>n = 34</b>    | <b>n = 37</b>    | <b>n = 31</b>    | <b>n = 129</b>    | <b>n = 74</b>     | <b>n = 286</b>    | <b>n = 96</b>     |
| Yes, sleeping facilities were provided next to my baby in the unit                                                                    | 179 (18%)          | 5 (9%)           | 4 (12%)          | 15 (31%)         | 5 (10%)          | 49 (45%)          | 4 (12%)          | 0 (0%)           | 1 (3%)           | 18 (14%)          | 41 (55%)          | 11 (4%)           | 26 (27%)          |
| Yes, sleeping facilities were provided outside the unit (e.g. in an apartment house nearby, in another unit)                          | 125 (13%)          | 5 (9%)           | 0 (0%)           | 6 (13%)          | 2 (4%)           | 8 (7%)            | 9 (26%)          | 0 (0%)           | 4 (13%)          | 18 (14%)          | 30 (41%)          | 11 (4%)           | 32 (33%)          |
| No, sleeping facilities were not provided                                                                                             | 680 (69%)          | 45 (82%)         | 29 (88%)         | 27 (56%)         | 44 (86%)         | 53 (48%)          | 21 (62%)         | 37 (100%)        | 26 (84%)         | 93 (72%)          | 3 (4%)            | 264 (92%)         | 38 (40%)          |
| <b>Which alternatives to being present were provided with your baby receiving special/intensive care? (multiple answers possible)</b> |                    |                  |                  |                  |                  |                   |                  |                  |                  |                   |                   |                   |                   |
|                                                                                                                                       | <b>n = 982</b>     | <b>n = 55</b>    | <b>n = 34</b>    | <b>n = 48</b>    | <b>n = 51</b>    | <b>n = 109</b>    | <b>n = 34</b>    | <b>n = 37</b>    | <b>n = 29</b>    | <b>n = 130</b>    | <b>n = 72</b>     | <b>n = 287</b>    | <b>n = 96</b>     |
| <b>Sum of multiple answers</b>                                                                                                        | <b>1122 (114%)</b> | <b>57 (104%)</b> | <b>39 (115%)</b> | <b>63 (131%)</b> | <b>59 (116%)</b> | <b>123 (113%)</b> | <b>35 (103%)</b> | <b>38 (103%)</b> | <b>30 (103%)</b> | <b>155 (119%)</b> | <b>100 (139%)</b> | <b>318 (111%)</b> | <b>105 (109%)</b> |
| Photos                                                                                                                                | 309 (32%)          | 6 (11%)          | 12 (35%)         | 12 (25%)         | 14 (27%)         | 28 (26%)          | 10 (29%)         | 5 (14%)          | 4 (14%)          | 69 (53%)          | 22 (31%)          | 114 (40%)         | 13 (14%)          |
| Livestream                                                                                                                            | 42 (4%)            | 6 (11%)          | 1 (3%)           | 5 (10%)          | 4 (8%)           | 1 (1%)            | 0 (0%)           | 1 (3%)           | 0 (0%)           | 16 (12%)          | 6 (8%)            | 0 (0%)            | 2 (2%)            |
| Recorded video                                                                                                                        | 74 (8%)            | 0 (0%)           | 2 (6%)           | 6 (13%)          | 3 (6%)           | 3 (3%)            | 1 (3%)           | 0 (0%)           | 0 (0%)           | 16 (12%)          | 12 (17%)          | 24 (8%)           | 7 (7%)            |
| Video calls                                                                                                                           | 52 (5%)            | 2 (4%)           | 2 (6%)           | 9 (19%)          | 1 (2%)           | 6 (6%)            | 1 (3%)           | 1 (3%)           | 5 (17%)          | 5 (4%)            | 14 (19%)          | 5 (2%)            | 1 (1%)            |
| None                                                                                                                                  | 542 (55%)          | 39 (71%)         | 19 (56%)         | 23 (48%)         | 26 (51%)         | 64 (59%)          | 20 (59%)         | 29 (78%)         | 20 (69%)         | 35 (27%)          | 30 (42%)          | 159 (55%)         | 78 (81%)          |
| Other                                                                                                                                 | 103 (11%)          | 4 (7%)           | 3 (9%)           | 8 (17%)          | 11 (22%)         | 21 (19%)          | 3 (9%)           | 2 (5%)           | 1 (3%)           | 14 (11%)          | 16 (22%)          | 16 (6%)           | 4 (4%)            |

Supplementary Table S5. 95% confidence interval of questions related to presence with the newborn and skin-to-skin care

|                                                                                                                                                                                                                                                                           | Total      | Australia   | Brazil      | Canada     | China       | France      | Italy       | Mexico      | New Zealand | Poland     | Sweden      | Turkey     | Ukraine    |
|---------------------------------------------------------------------------------------------------------------------------------------------------------------------------------------------------------------------------------------------------------------------------|------------|-------------|-------------|------------|-------------|-------------|-------------|-------------|-------------|------------|-------------|------------|------------|
| <b>Do you know if the Coronavirus/COVID-19 situation affected the facility policy around your ability to be present with the baby receiving special/intensive care?</b>                                                                                                   |            |             |             |            |             |             |             |             |             |            |             |            |            |
|                                                                                                                                                                                                                                                                           | n = 991    | n = 55      | n = 34      | n = 49     | n = 52      | n = 110     | n = 34      | n = 37      | n = 31      | n = 132    | n = 73      | n = 288    | n = 96     |
| Restrictions were implemented                                                                                                                                                                                                                                             | 0.80; 0.85 | 0.69; 0.91  | 0.77; 0.99  | 0.81; 0.98 | 0.57; 0.82  | 0.79; 0.92  | 0.66; 0.93  | 0.83; 1.01  | 0.67; 0.95  | 0.84; 0.95 | 0.49; 0.71  | 0.79; 0.88 | 0.75; 0.90 |
| <b>Could more than one person be present with the baby at the same time?</b>                                                                                                                                                                                              |            |             |             |            |             |             |             |             |             |            |             |            |            |
|                                                                                                                                                                                                                                                                           | n = 990    | n = 55      | n = 34      | n = 49     | n = 52      | n = 110     | n = 34      | n = 37      | n = 31      | n = 130    | n = 74      | n = 288    | n = 96     |
| Yes                                                                                                                                                                                                                                                                       | 0.30; 0.36 | 0.43; 0.69  | 0.12; 0.41  | 0.27; 0.55 | 0.38; 0.66  | 0.55; 0.73  | -0.02; 0.14 | -0.02; 0.13 | 0.34; 0.69  | 0.01; 0.07 | 0.75; 0.92  | 0.18; 0.28 | 0.09; 0.24 |
| <b>How long were you allowed to see your baby per visit?</b>                                                                                                                                                                                                              |            |             |             |            |             |             |             |             |             |            |             |            |            |
|                                                                                                                                                                                                                                                                           | n = 989    | n = 55      | n = 34      | n = 49     | n = 52      | n = 109     | n = 34      | n = 37      | n = 31      | n = 131    | n = 73      | n = 288    | n = 96     |
| Not at all                                                                                                                                                                                                                                                                | 0.18; 0.23 | n.a.        | -0.03; 0.09 | n.a.       | 0.77; 0.96  | -0.01; 0.03 | -0.02; 0.14 | 0.01; 0.21  | n.a.        | 0.18; 0.33 | -0.01; 0.04 | 0.28; 0.39 | 0.08; 0.22 |
| <b>Do you feel that the measures that were implemented due to Coronavirus/COVID-19 (e.g. restrictions by hospital management) made it more difficult for you to be present with your baby?</b>                                                                            |            |             |             |            |             |             |             |             |             |            |             |            |            |
|                                                                                                                                                                                                                                                                           | n = 990    | n = 55      | n = 34      | n = 48     | n = 51      | n = 110     | n = 34      | n = 37      | n = 31      | n = 132    | n = 74      | n = 288    | n = 96     |
| Yes                                                                                                                                                                                                                                                                       | 0.71; 0.76 | 0.47; 0.73  | 0.36; 0.70  | 0.65; 0.89 | 0.65; 0.88  | 0.46; 0.65  | 0.39; 0.73  | 0.87; 1.02  | 0.48; 0.81  | 0.79; 0.91 | 0.1; 0.28   | 0.88; 0.95 | 0.7; 0.86  |
| <b>Do you feel that the measures that were implemented due to Coronavirus/COVID-19 (e.g. restrictions by hospital management) made it more difficult for you to be interactive with your baby (e.g. skin-to-skin contact or being involved in the care of your baby)?</b> |            |             |             |            |             |             |             |             |             |            |             |            |            |
|                                                                                                                                                                                                                                                                           | n = 989    | n = 55      | n = 34      | n = 49     | n = 51      | n = 110     | n = 34      | n = 37      | n = 31      | n = 132    | n = 74      | n = 286    | n = 96     |
| Yes                                                                                                                                                                                                                                                                       | 0.61; 0.67 | 0.12; 0.35  | 0.27; 0.61  | 0.41; 0.69 | 0.63; 0.86  | 0.28; 0.46  | 0.45; 0.78  | 0.92; 1.03  | 0.13; 0.45  | 0.74; 0.87 | 0.05; 0.20  | 0.90; 0.96 | 0.45; 0.65 |
| <b>When was skin-to-skin contact with your baby and one of the parents initiated (e.g. holding the baby on the chest, kangaroo mother care)?</b>                                                                                                                          |            |             |             |            |             |             |             |             |             |            |             |            |            |
|                                                                                                                                                                                                                                                                           | n = 1044   | n = 56      | n = 33      | n = 49     | n = 52      | n = 117     | n = 35      | n = 38      | n = 31      | n = 146    | n = 75      | n = 308    | n = 104    |
| Not during the time in the hospital if discharged                                                                                                                                                                                                                         | 0.21; 0.26 | n.a.        | -0.03; 0.09 | n.a.       | -0.01; 0.09 | -0.01; 0.03 | 0.07; 0.33  | 0.31; 0.63  | n.a.        | 0.25; 0.40 | n.a.        | 0.43; 0.55 | 0.08; 0.22 |
| <b>How often were you permitted to have skin-to-skin contact (kangaroo mother care) with your baby?</b>                                                                                                                                                                   |            |             |             |            |             |             |             |             |             |            |             |            |            |
|                                                                                                                                                                                                                                                                           | n = 1043   | n = 56      | n = 32      | n = 49     | n = 52      | n = 118     | n = 34      | n = 38      | n = 31      | n = 146    | n = 75      | n = 308    | n = 104    |
| As often as I wanted                                                                                                                                                                                                                                                      | 0.26; 0.32 | 0.20; 0.44  | 0.27; 0.61  | 0.37; 0.65 | n.a.        | 0.77; 0.91  | 0.09; 0.38  | n.a.        | 0.34; 0.69  | 0.04; 0.13 | 0.76; 0.92  | 0.01; 0.06 | 0.25; 0.44 |
| <b>Did medical/nursing staff involve you in the care of your baby (e.g. nappy changing, feeding, temperature taking)?</b>                                                                                                                                                 |            |             |             |            |             |             |             |             |             |            |             |            |            |
|                                                                                                                                                                                                                                                                           | n = 989    | n = 55      | n = 34      | n = 49     | n = 51      | n = 110     | n = 34      | n = 37      | n = 31      | n = 131    | n = 74      | n = 287    | n = 96     |
| No, not at all                                                                                                                                                                                                                                                            | 0.34; 0.40 | -0.02; 0.05 | 0.12; 0.41  | n.a.       | 0.67; 0.90  | -0.01; 0.03 | -0.02; 0.14 | 0.38; 0.70  | n.a.        | 0.32; 0.49 | n.a.        | 0.68; 0.79 | 0.19; 0.37 |
| <b>Did medical/nursing staff involve your partner in the care of your baby?</b>                                                                                                                                                                                           |            |             |             |            |             |             |             |             |             |            |             |            |            |
|                                                                                                                                                                                                                                                                           | n = 990    | n = 55      | n = 34      | n = 49     | n = 51      | n = 110     | n = 34      | n = 37      | n = 31      | n = 131    | n = 74      | n = 288    | n = 96     |
| No, not at all                                                                                                                                                                                                                                                            | 0.54; 0.60 | -0.02; 0.05 | 0.39; 0.73  | 0.03; 0.21 | 0.65; 0.88  | 0.01; 0.10  | 0.05; 0.30  | 0.49; 0.80  | 0.03; 0.29  | 0.81; 0.93 | 0.00; 0.09  | 0.88; 0.95 | 0.77; 0.92 |

Supplementary Table S6. Information on breastfeeding/nutrition

|                                                                                                                          | Total              | Australia        | Brazil           | Canada           | China            | France            | Italy            | Mexico           | New Zealand      | Poland            | Sweden            | Turkey            | Ukraine           |
|--------------------------------------------------------------------------------------------------------------------------|--------------------|------------------|------------------|------------------|------------------|-------------------|------------------|------------------|------------------|-------------------|-------------------|-------------------|-------------------|
| <b>Was initiation of breastfeeding encouraged by medical/nursing staff?</b>                                              |                    |                  |                  |                  |                  |                   |                  |                  |                  |                   |                   |                   |                   |
|                                                                                                                          | <b>n = 1024</b>    | <b>n = 55</b>    | <b>n = 34</b>    | <b>n = 49</b>    | <b>n = 51</b>    | <b>n = 115</b>    | <b>n = 34</b>    | <b>n = 38</b>    | <b>n = 31</b>    | <b>n = 140</b>    | <b>n = 75</b>     | <b>n = 299</b>    | <b>n = 103</b>    |
| Yes, highly encouraged                                                                                                   | 515 (50%)          | 48 (87%)         | 23 (68%)         | 30 (61%)         | 50 (98%)         | 78 (68%)          | 13 (38%)         | 20 (53%)         | 23 (74%)         | 52 (37%)          | 35 (47%)          | 95 (32%)          | 48 (47%)          |
| Yes, somewhat encouraged                                                                                                 | 265 (26%)          | 5 (9%)           | 6 (18%)          | 12 (24%)         | 0 (0%)           | 24 (21%)          | 9 (26%)          | 15 (39%)         | 5 (16%)          | 41 (29%)          | 31 (41%)          | 82 (27%)          | 35 (34%)          |
| No, not encouraged at all                                                                                                | 189 (18%)          | 1 (2%)           | 4 (12%)          | 5 (10%)          | 0 (0%)           | 10 (9%)           | 11 (32%)         | 3 (8%)           | 0 (0%)           | 39 (28%)          | 9 (12%)           | 89 (30%)          | 18 (17%)          |
| Don't know                                                                                                               | 55 (5%)            | 1 (2%)           | 1 (3%)           | 2 (4%)           | 1 (2%)           | 3 (3%)            | 1 (3%)           | 0 (0%)           | 3 (10%)          | 8 (6%)            | 0 (0%)            | 33 (11%)          | 2 (2%)            |
| <b>Was your baby breastfed or provided with mother's own pumped/expressed breastmilk in the first weeks after birth?</b> |                    |                  |                  |                  |                  |                   |                  |                  |                  |                   |                   |                   |                   |
|                                                                                                                          | <b>n = 1023</b>    | <b>n = 55</b>    | <b>n = 34</b>    | <b>n = 49</b>    | <b>n = 51</b>    | <b>n = 114</b>    | <b>n = 34</b>    | <b>n = 38</b>    | <b>n = 30</b>    | <b>n = 141</b>    | <b>n = 75</b>     | <b>n = 299</b>    | <b>n = 103</b>    |
| Yes, exclusively                                                                                                         | 506 (49%)          | 38 (69%)         | 14 (41%)         | 25 (51%)         | 31 (61%)         | 53 (46%)          | 15 (44%)         | 9 (24%)          | 22 (73%)         | 67 (48%)          | 24 (32%)          | 178 (60%)         | 30 (29%)          |
| Yes, partly                                                                                                              | 436 (43%)          | 16 (29%)         | 17 (50%)         | 22 (45%)         | 18 (35%)         | 46 (40%)          | 16 (47%)         | 24 (63%)         | 7 (23%)          | 54 (38%)          | 45 (60%)          | 116 (39%)         | 55 (53%)          |
| No, not at all                                                                                                           | 76 (7%)            | 1 (2%)           | 3 (9%)           | 1 (2%)           | 2 (4%)           | 14 (12%)          | 3 (9%)           | 5 (13%)          | 1 (3%)           | 18 (13%)          | 6 (8%)            | 4 (1%)            | 18 (17%)          |
| Don't know                                                                                                               | 5 (0%)             | 0 (0%)           | 0 (0%)           | 1 (2%)           | 0 (0%)           | 1 (1%)            | 0 (0%)           | 0 (0%)           | 0 (0%)           | 2 (1%)            | 0 (0%)            | 1 (0%)            | 0 (0%)            |
| <b>When did the initiation of breastfeeding or provision of mother's own pumped/expressed breastmilk take place?</b>     |                    |                  |                  |                  |                  |                   |                  |                  |                  |                   |                   |                   |                   |
|                                                                                                                          | <b>n = 1026</b>    | <b>n = 55</b>    | <b>n = 34</b>    | <b>n = 49</b>    | <b>n = 51</b>    | <b>n = 115</b>    | <b>n = 34</b>    | <b>n = 38</b>    | <b>n = 31</b>    | <b>n = 141</b>    | <b>n = 75</b>     | <b>n = 300</b>    | <b>n = 103</b>    |
| Not applicable; baby was not breastfed                                                                                   | 56 (5%)            | 1 (2%)           | 2 (6%)           | 0 (0%)           | 2 (4%)           | 12 (10%)          | 2 (6%)           | 4 (11%)          | 0 (0%)           | 19 (13%)          | 3 (4%)            | 1 (0%)            | 10 (10%)          |
| On the first day                                                                                                         | 348 (34%)          | 29 (53%)         | 5 (15%)          | 28 (57%)         | 8 (16%)          | 60 (52%)          | 10 (29%)         | 1 (3%)           | 17 (55%)         | 39 (28%)          | 23 (31%)          | 112 (37%)         | 16 (16%)          |
| After the first day but during the first week                                                                            | 409 (40%)          | 21 (38%)         | 18 (53%)         | 18 (37%)         | 34 (67%)         | 10 (9%)           | 14 (41%)         | 13 (34%)         | 9 (29%)          | 64 (45%)          | 41 (55%)          | 125 (42%)         | 42 (41%)          |
| After the first week                                                                                                     | 172 (17%)          | 4 (7%)           | 9 (26%)          | 2 (4%)           | 4 (8%)           | 26 (23%)          | 7 (21%)          | 19 (50%)         | 4 (13%)          | 13 (9%)           | 7 (9%)            | 45 (15%)          | 32 (31%)          |
| Don't know                                                                                                               | 41 (4%)            | 0 (0%)           | 0 (0%)           | 1 (2%)           | 3 (6%)           | 7 (6%)            | 1 (3%)           | 1 (3%)           | 1 (3%)           | 6 (4%)            | 1 (1%)            | 17 (6%)           | 3 (3%)            |
| <b>Were you allowed to bring expressed milk from home to the unit?</b>                                                   |                    |                  |                  |                  |                  |                   |                  |                  |                  |                   |                   |                   |                   |
|                                                                                                                          | <b>n = 1024</b>    | <b>n = 55</b>    | <b>n = 34</b>    | <b>n = 49</b>    | <b>n = 51</b>    | <b>n = 115</b>    | <b>n = 34</b>    | <b>n = 38</b>    | <b>n = 31</b>    | <b>n = 141</b>    | <b>n = 74</b>     | <b>n = 299</b>    | <b>n = 103</b>    |
| Not applicable; baby was not breastfed                                                                                   | 41 (4%)            | 1 (2%)           | 0 (0%)           | 0 (0%)           | 0 (0%)           | 12 (10%)          | 1 (3%)           | 2 (5%)           | 1 (3%)           | 7 (5%)            | 4 (5%)            | 3 (1%)            | 10 (10%)          |
| Yes                                                                                                                      | 782 (76%)          | 52 (95%)         | 8 (24%)          | 46 (94%)         | 51 (100%)        | 79 (69%)          | 30 (88%)         | 26 (68%)         | 25 (81%)         | 99 (70%)          | 46 (62%)          | 282 (94%)         | 38 (37%)          |
| No, the milk had to be expressed at the hospital                                                                         | 121 (12%)          | 1 (2%)           | 24 (71%)         | 1 (2%)           | 0 (0%)           | 16 (14%)          | 3 (9%)           | 8 (21%)          | 2 (6%)           | 11 (8%)           | 15 (20%)          | 7 (2%)            | 33 (32%)          |
| No, other                                                                                                                | 80 (8%)            | 1 (2%)           | 2 (6%)           | 2 (4%)           | 0 (0%)           | 8 (7%)            | 0 (0%)           | 2 (5%)           | 3 (10%)          | 24 (17%)          | 9 (12%)           | 7 (2%)            | 22 (21%)          |
| <b>How was your baby fed? (multiple answers possible)</b>                                                                |                    |                  |                  |                  |                  |                   |                  |                  |                  |                   |                   |                   |                   |
|                                                                                                                          | <b>n = 1027</b>    | <b>n = 55</b>    | <b>n = 34</b>    | <b>n = 49</b>    | <b>n = 52</b>    | <b>n = 115</b>    | <b>n = 34</b>    | <b>n = 38</b>    | <b>n = 31</b>    | <b>n = 141</b>    | <b>n = 75</b>     | <b>n = 300</b>    | <b>n = 103</b>    |
| <b>Sum of multiple answers</b>                                                                                           | <b>1505 (147%)</b> | <b>83 (151%)</b> | <b>57 (168%)</b> | <b>91 (186%)</b> | <b>79 (152%)</b> | <b>192 (167%)</b> | <b>57 (168%)</b> | <b>59 (155%)</b> | <b>39 (126%)</b> | <b>214 (152%)</b> | <b>122 (163%)</b> | <b>366 (122%)</b> | <b>146 (142%)</b> |
| With breastmilk (breastfeeding or pumped milk)                                                                           | 912 (89%)          | 54 (98%)         | 30 (88%)         | 48 (98%)         | 50 (96%)         | 97 (84%)          | 30 (88%)         | 32 (84%)         | 30 (97%)         | 123 (87%)         | 60 (80%)          | 286 (95%)         | 72 (70%)          |
| With donor milk                                                                                                          | 229 (22%)          | 14 (25%)         | 6 (18%)          | 29 (59%)         | 14 (27%)         | 51 (44%)          | 11 (32%)         | 2 (5%)           | 4 (13%)          | 38 (27%)          | 44 (59%)          | 4 (1%)            | 12 (12%)          |
| With formula milk                                                                                                        | 352 (34%)          | 15 (27%)         | 20 (59%)         | 14 (29%)         | 15 (29%)         | 44 (38%)          | 15 (44%)         | 25 (66%)         | 5 (16%)          | 53 (38%)          | 18 (24%)          | 68 (23%)          | 60 (58%)          |
| Don't know                                                                                                               | 12 (1%)            | 0 (0%)           | 1 (3%)           | 0 (0%)           | 0 (0%)           | 0 (0%)            | 1 (3%)           | 0 (0%)           | 0 (0%)           | 0 (0%)            | 0 (0%)            | 8 (3%)            | 2 (2%)            |



Supplementary Table S7. Information on health communication

|                                                                                                                                                                      | Total              | Australia        | Brazil           | Canada           | China            | France            | Italy            | Mexico           | New Zealand      | Poland            | Sweden            | Turkey            | Ukraine           |
|----------------------------------------------------------------------------------------------------------------------------------------------------------------------|--------------------|------------------|------------------|------------------|------------------|-------------------|------------------|------------------|------------------|-------------------|-------------------|-------------------|-------------------|
| <b>Do you feel you received or are receiving adequate general health information about your baby during the hospital stay?</b>                                       |                    |                  |                  |                  |                  |                   |                  |                  |                  |                   |                   |                   |                   |
|                                                                                                                                                                      | <b>n = 982</b>     | <b>n = 55</b>    | <b>n = 34</b>    | <b>n = 49</b>    | <b>n = 51</b>    | <b>n = 110</b>    | <b>n = 34</b>    | <b>n = 35</b>    | <b>n = 30</b>    | <b>n = 132</b>    | <b>n = 74</b>     | <b>n = 283</b>    | <b>n = 95</b>     |
| Yes, to a high degree                                                                                                                                                | 451 (46%)          | 36 (65%)         | 18 (53%)         | 29 (59%)         | 20 (39%)         | 62 (56%)          | 18 (53%)         | 13 (37%)         | 20 (67%)         | 50 (38%)          | 57 (77%)          | 96 (34%)          | 32 (34%)          |
| Yes, to some degree                                                                                                                                                  | 424 (43%)          | 15 (27%)         | 14 (41%)         | 18 (37%)         | 23 (45%)         | 37 (34%)          | 15 (44%)         | 16 (46%)         | 9 (30%)          | 60 (45%)          | 14 (19%)          | 156 (55%)         | 47 (49%)          |
| No, not at all                                                                                                                                                       | 83 (8%)            | 4 (7%)           | 1 (3%)           | 2 (4%)           | 2 (4%)           | 9 (8%)            | 1 (3%)           | 5 (14%)          | 1 (3%)           | 21 (16%)          | 3 (4%)            | 24 (8%)           | 10 (11%)          |
| Don't know                                                                                                                                                           | 9 (1%)             | 0 (0%)           | 0 (0%)           | 0 (0%)           | 1 (2%)           | 1 (1%)            | 0 (0%)           | 0 (0%)           | 0 (0%)           | 0 (0%)            | 0 (0%)            | 3 (1%)            | 4 (4%)            |
| I didn't receive any information                                                                                                                                     | 15 (2%)            | 0 (0%)           | 1 (3%)           | 0 (0%)           | 5 (10%)          | 1 (1%)            | 0 (0%)           | 1 (3%)           | 0 (0%)           | 1 (1%)            | 0 (0%)            | 4 (1%)            | 2 (2%)            |
| <b>How did you receive health information about your baby during the time your baby received or is receiving special/intensive care? (multiple answers possible)</b> |                    |                  |                  |                  |                  |                   |                  |                  |                  |                   |                   |                   |                   |
|                                                                                                                                                                      | <b>n = 982</b>     | <b>n = 55</b>    | <b>n = 34</b>    | <b>n = 49</b>    | <b>n = 52</b>    | <b>n = 110</b>    | <b>n = 34</b>    | <b>n = 35</b>    | <b>n = 30</b>    | <b>n = 132</b>    | <b>n = 74</b>     | <b>n = 282</b>    | <b>n = 95</b>     |
| <b>Sum of multiple answers</b>                                                                                                                                       | <b>1392 (142%)</b> | <b>96 (175%)</b> | <b>40 (118%)</b> | <b>96 (196%)</b> | <b>78 (150%)</b> | <b>166 (151%)</b> | <b>47 (138%)</b> | <b>40 (114%)</b> | <b>54 (180%)</b> | <b>180 (136%)</b> | <b>111 (150%)</b> | <b>359 (127%)</b> | <b>125 (132%)</b> |
| Meetings with medical/nursing staff (face to face)                                                                                                                   | 743 (76%)          | 50 (91%)         | 34 (100%)        | 46 (94%)         | 24 (46%)         | 96 (87%)          | 31 (91%)         | 28 (80%)         | 28 (93%)         | 79 (60%)          | 74 (100%)         | 164 (58%)         | 89 (94%)          |
| Meetings with medical/nursing staff (video conference)                                                                                                               | 28 (3%)            | 2 (4%)           | 0 (0%)           | 8 (16%)          | 2 (4%)           | 4 (4%)            | 1 (3%)           | 0 (0%)           | 2 (7%)           | 1 (1%)            | 4 (5%)            | 4 (1%)            | 0 (0%)            |
| Phone calls                                                                                                                                                          | 491 (50%)          | 28 (51%)         | 5 (15%)          | 28 (57%)         | 48 (92%)         | 51 (46%)          | 8 (24%)          | 7 (20%)          | 11 (37%)         | 88 (67%)          | 12 (16%)          | 178 (63%)         | 27 (28%)          |
| E-Mails                                                                                                                                                              | 8 (1%)             | 0 (0%)           | 0 (0%)           | 0 (0%)           | 0 (0%)           | 2 (2%)            | 0 (0%)           | 0 (0%)           | 0 (0%)           | 4 (3%)            | 0 (0%)            | 1 (0%)            | 1 (1%)            |
| Letters                                                                                                                                                              | 2 (0%)             | 0 (0%)           | 0 (0%)           | 0 (0%)           | 0 (0%)           | 0 (0%)            | 0 (0%)           | 0 (0%)           | 2 (7%)           | 0 (0%)            | 0 (0%)            | 0 (0%)            | 0 (0%)            |
| Information material (e.g. brochure, website)                                                                                                                        | 84 (9%)            | 13 (24%)         | 0 (0%)           | 11 (22%)         | 3 (6%)           | 9 (8%)            | 3 (9%)           | 2 (6%)           | 10 (33%)         | 5 (4%)            | 21 (28%)          | 2 (1%)            | 5 (5%)            |
| I didn't receive information                                                                                                                                         | 10 (1%)            | 0 (0%)           | 0 (0%)           | 0 (0%)           | 0 (0%)           | 1 (1%)            | 2 (6%)           | 0 (0%)           | 0 (0%)           | 1 (1%)            | 0 (0%)            | 4 (1%)            | 2 (2%)            |
| Other                                                                                                                                                                | 26 (3%)            | 3 (5%)           | 1 (3%)           | 3 (6%)           | 1 (2%)           | 3 (3%)            | 2 (6%)           | 3 (9%)           | 1 (3%)           | 2 (2%)            | 0 (0%)            | 6 (2%)            | 1 (1%)            |
| <b>How often did you receive information about your baby during the time your baby received or is receiving special/intensive care?</b>                              |                    |                  |                  |                  |                  |                   |                  |                  |                  |                   |                   |                   |                   |
|                                                                                                                                                                      | <b>n = 983</b>     | <b>n = 55</b>    | <b>n = 34</b>    | <b>n = 49</b>    | <b>n = 52</b>    | <b>n = 110</b>    | <b>n = 34</b>    | <b>n = 35</b>    | <b>n = 30</b>    | <b>n = 132</b>    | <b>n = 74</b>     | <b>n = 283</b>    | <b>n = 95</b>     |
| Multiple times per day                                                                                                                                               | 261 (27%)          | 30 (55%)         | 5 (15%)          | 23 (47%)         | 1 (2%)           | 59 (54%)          | 9 (26%)          | 5 (14%)          | 15 (50%)         | 22 (17%)          | 42 (57%)          | 28 (10%)          | 22 (23%)          |
| Once per day                                                                                                                                                         | 494 (50%)          | 19 (35%)         | 27 (79%)         | 21 (43%)         | 2 (4%)           | 40 (36%)          | 15 (44%)         | 27 (77%)         | 10 (33%)         | 72 (55%)          | 22 (30%)          | 176 (62%)         | 63 (66%)          |
| Multiple times per week                                                                                                                                              | 168 (17%)          | 4 (7%)           | 2 (6%)           | 2 (4%)           | 32 (62%)         | 6 (5%)            | 7 (21%)          | 2 (6%)           | 3 (10%)          | 34 (26%)          | 9 (12%)           | 59 (21%)          | 8 (8%)            |
| Once per week                                                                                                                                                        | 33 (3%)            | 1 (2%)           | 0 (0%)           | 0 (0%)           | 9 (17%)          | 2 (2%)            | 2 (6%)           | 0 (0%)           | 1 (3%)           | 2 (2%)            | 0 (0%)            | 15 (5%)           | 1 (1%)            |
| Less than once per week                                                                                                                                              | 13 (1%)            | 1 (2%)           | 0 (0%)           | 1 (2%)           | 3 (6%)           | 2 (2%)            | 1 (3%)           | 1 (3%)           | 0 (0%)           | 1 (1%)            | 0 (0%)            | 2 (1%)            | 1 (1%)            |
| Never                                                                                                                                                                | 8 (1%)             | 0 (0%)           | 0 (0%)           | 1 (2%)           | 2 (4%)           | 1 (1%)            | 0 (0%)           | 0 (0%)           | 0 (0%)           | 1 (1%)            | 1 (1%)            | 2 (1%)            | 0 (0%)            |
| Don't know                                                                                                                                                           | 6 (1%)             | 0 (0%)           | 0 (0%)           | 1 (2%)           | 3 (6%)           | 0 (0%)            | 0 (0%)           | 0 (0%)           | 1 (3%)           | 0 (0%)            | 0 (0%)            | 1 (0%)            | 0 (0%)            |

Supplementary Table S7. Information on health communication (continued)

|                                                                                                                                                                                                                           | Total          | Australia     | Brazil        | Canada        | China         | France         | Italy         | Mexico        | New Zealand   | Poland         | Sweden        | Turkey         | Ukraine       |
|---------------------------------------------------------------------------------------------------------------------------------------------------------------------------------------------------------------------------|----------------|---------------|---------------|---------------|---------------|----------------|---------------|---------------|---------------|----------------|---------------|----------------|---------------|
| <b>Do you feel you received or are receiving adequate information about how to protect yourself and your baby from Coronavirus/COVID-19 transmission while your baby received or is receiving special/intensive care?</b> |                |               |               |               |               |                |               |               |               |                |               |                |               |
|                                                                                                                                                                                                                           | <b>n = 983</b> | <b>n = 55</b> | <b>n = 34</b> | <b>n = 49</b> | <b>n = 52</b> | <b>n = 110</b> | <b>n = 34</b> | <b>n = 35</b> | <b>n = 30</b> | <b>n = 132</b> | <b>n = 74</b> | <b>n = 283</b> | <b>n = 95</b> |
| Yes, to a high degree                                                                                                                                                                                                     | 321 (33%)      | 22 (40%)      | 12 (35%)      | 13 (27%)      | 26 (50%)      | 43 (39%)       | 21 (62%)      | 12 (34%)      | 11 (37%)      | 30 (23%)       | 31 (42%)      | 73 (26%)       | 27 (28%)      |
| Yes, to some degree                                                                                                                                                                                                       | 334 (34%)      | 23 (42%)      | 14 (41%)      | 22 (45%)      | 15 (29%)      | 38 (35%)       | 8 (24%)       | 15 (43%)      | 12 (40%)      | 37 (28%)       | 23 (31%)      | 92 (33%)       | 35 (37%)      |
| No, not at all                                                                                                                                                                                                            | 187 (19%)      | 3 (5%)        | 4 (12%)       | 11 (22%)      | 2 (4%)        | 18 (16%)       | 3 (9%)        | 5 (14%)       | 3 (10%)       | 29 (22%)       | 14 (19%)      | 80 (28%)       | 15 (16%)      |
| Don't know                                                                                                                                                                                                                | 49 (5%)        | 2 (4%)        | 0 (0%)        | 1 (2%)        | 5 (10%)       | 2 (2%)         | 1 (3%)        | 2 (6%)        | 0 (0%)        | 15 (11%)       | 5 (7%)        | 9 (3%)         | 7 (7%)        |
| I didn't receive any information                                                                                                                                                                                          | 92 (9%)        | 5 (9%)        | 4 (12%)       | 2 (4%)        | 4 (8%)        | 9 (8%)         | 1 (3%)        | 1 (3%)        | 4 (13%)       | 21 (16%)       | 1 (1%)        | 29 (10%)       | 11 (12%)      |
| <b>Do you feel you received adequate information about Coronavirus/COVID-19 when discharged from the hospital?</b>                                                                                                        |                |               |               |               |               |                |               |               |               |                |               |                |               |
|                                                                                                                                                                                                                           | <b>n = 982</b> | <b>n = 55</b> | <b>n = 34</b> | <b>n = 49</b> | <b>n = 52</b> | <b>n = 110</b> | <b>n = 34</b> | <b>n = 35</b> | <b>n = 30</b> | <b>n = 132</b> | <b>n = 74</b> | <b>n = 282</b> | <b>n = 95</b> |
| Yes, to a high degree                                                                                                                                                                                                     | 204 (21%)      | 14 (25%)      | 6 (18%)       | 5 (10%)       | 20 (38%)      | 29 (26%)       | 14 (41%)      | 6 (17%)       | 2 (7%)        | 22 (17%)       | 18 (24%)      | 51 (18%)       | 17 (18%)      |
| Yes, to some degree                                                                                                                                                                                                       | 224 (23%)      | 16 (29%)      | 14 (41%)      | 19 (39%)      | 15 (29%)      | 21 (19%)       | 10 (29%)      | 9 (26%)       | 8 (27%)       | 15 (11%)       | 16 (22%)      | 62 (22%)       | 19 (20%)      |
| No, not at all                                                                                                                                                                                                            | 217 (22%)      | 7 (13%)       | 5 (15%)       | 12 (24%)      | 1 (2%)        | 29 (26%)       | 6 (18%)       | 10 (29%)      | 7 (23%)       | 20 (15%)       | 20 (27%)      | 77 (27%)       | 23 (24%)      |
| Don't know                                                                                                                                                                                                                | 35 (4%)        | 1 (2%)        | 0 (0%)        | 0 (0%)        | 3 (6%)        | 3 (3%)         | 0 (0%)        | 2 (6%)        | 0 (0%)        | 8 (6%)         | 2 (3%)        | 8 (3%)         | 8 (8%)        |
| I didn't receive any information                                                                                                                                                                                          | 157 (16%)      | 10 (18%)      | 4 (12%)       | 6 (12%)       | 2 (4%)        | 15 (14%)       | 2 (6%)        | 4 (11%)       | 5 (17%)       | 50 (38%)       | 8 (11%)       | 34 (12%)       | 17 (18%)      |
| No discharge yet                                                                                                                                                                                                          | 145 (15%)      | 7 (13%)       | 5 (15%)       | 7 (14%)       | 11 (21%)      | 13 (12%)       | 2 (6%)        | 4 (11%)       | 8 (27%)       | 17 (13%)       | 10 (14%)      | 50 (18%)       | 11 (12%)      |

Supplementary Table S8. Information on mental health status

|                                                                                                                                                                                      | Total              | Australia        | Brazil           | Canada           | China            | France            | Italy            | Mexico           | New Zealand      | Poland            | Sweden           | Turkey            | Ukraine           |
|--------------------------------------------------------------------------------------------------------------------------------------------------------------------------------------|--------------------|------------------|------------------|------------------|------------------|-------------------|------------------|------------------|------------------|-------------------|------------------|-------------------|-------------------|
| <b>Did you worry because of the Coronavirus/COVID-19 situation during pregnancy?</b>                                                                                                 |                    |                  |                  |                  |                  |                   |                  |                  |                  |                   |                  |                   |                   |
|                                                                                                                                                                                      | <b>n = 966</b>     | <b>n = 55</b>    | <b>n = 33</b>    | <b>n = 48</b>    | <b>n = 50</b>    | <b>n = 107</b>    | <b>n = 34</b>    | <b>n = 34</b>    | <b>n = 30</b>    | <b>n = 132</b>    | <b>n = 71</b>    | <b>n = 278</b>    | <b>n = 94</b>     |
| Yes, to a high degree                                                                                                                                                                | 459 (48%)          | 25 (45%)         | 17 (52%)         | 20 (42%)         | 9 (18%)          | 35 (33%)          | 13 (38%)         | 24 (71%)         | 11 (37%)         | 66 (50%)          | 25 (35%)         | 157 (56%)         | 57 (61%)          |
| Yes, to some degree                                                                                                                                                                  | 304 (31%)          | 19 (35%)         | 7 (21%)          | 19 (40%)         | 17 (34%)         | 44 (41%)          | 17 (50%)         | 6 (18%)          | 15 (50%)         | 39 (30%)          | 27 (38%)         | 66 (24%)          | 28 (30%)          |
| No, not at all                                                                                                                                                                       | 100 (10%)          | 5 (9%)           | 0 (0%)           | 5 (10%)          | 20 (40%)         | 11 (10%)          | 1 (3%)           | 1 (3%)           | 3 (10%)          | 11 (8%)           | 14 (20%)         | 23 (8%)           | 6 (6%)            |
| Don't know                                                                                                                                                                           | 12 (1%)            | 0 (0%)           | 0 (0%)           | 0 (0%)           | 0 (0%)           | 3 (3%)            | 1 (3%)           | 0 (0%)           | 0 (0%)           | 5 (4%)            | 0 (0%)           | 3 (1%)            | 0 (0%)            |
| Coronavirus/COVID-19 was not an issue then                                                                                                                                           | 91 (9%)            | 6 (11%)          | 9 (27%)          | 4 (8%)           | 4 (8%)           | 14 (13%)          | 2 (6%)           | 3 (9%)           | 1 (3%)           | 11 (8%)           | 5 (7%)           | 29 (10%)          | 3 (3%)            |
| <b>Did (or do) you struggle to be present with your baby who received or is receiving special care due to other obligations you have (e.g. for other children, family member/s)?</b> |                    |                  |                  |                  |                  |                   |                  |                  |                  |                   |                  |                   |                   |
|                                                                                                                                                                                      | <b>n = 966</b>     | <b>n = 55</b>    | <b>n = 33</b>    | <b>n = 48</b>    | <b>n = 51</b>    | <b>n = 107</b>    | <b>n = 34</b>    | <b>n = 34</b>    | <b>n = 30</b>    | <b>n = 131</b>    | <b>n = 72</b>    | <b>n = 278</b>    | <b>n = 93</b>     |
| Yes, to a high degree                                                                                                                                                                | 207 (21%)          | 13 (24%)         | 5 (15%)          | 12 (25%)         | 7 (14%)          | 16 (15%)          | 2 (6%)           | 13 (38%)         | 4 (13%)          | 21 (16%)          | 24 (33%)         | 70 (25%)          | 20 (22%)          |
| Yes, to some degree                                                                                                                                                                  | 261 (27%)          | 12 (22%)         | 8 (24%)          | 15 (31%)         | 12 (24%)         | 28 (26%)          | 7 (21%)          | 7 (21%)          | 12 (40%)         | 22 (17%)          | 27 (38%)         | 81 (29%)          | 30 (32%)          |
| No, not at all                                                                                                                                                                       | 440 (46%)          | 30 (55%)         | 20 (61%)         | 21 (44%)         | 27 (53%)         | 62 (58%)          | 25 (74%)         | 13 (38%)         | 14 (47%)         | 66 (50%)          | 19 (26%)         | 108 (39%)         | 35 (38%)          |
| Don't know                                                                                                                                                                           | 58 (6%)            | 0 (0%)           | 0 (0%)           | 0 (0%)           | 5 (10%)          | 1 (1%)            | 0 (0%)           | 1 (3%)           | 0 (0%)           | 22 (17%)          | 2 (3%)           | 19 (7%)           | 8 (9%)            |
| <b>What kind of support was offered? (multiple answers possible)</b>                                                                                                                 |                    |                  |                  |                  |                  |                   |                  |                  |                  |                   |                  |                   |                   |
|                                                                                                                                                                                      | <b>n = 967</b>     | <b>n = 55</b>    | <b>n = 32</b>    | <b>n = 48</b>    | <b>n = 51</b>    | <b>n = 107</b>    | <b>n = 34</b>    | <b>n = 34</b>    | <b>n = 30</b>    | <b>n = 132</b>    | <b>n = 72</b>    | <b>n = 278</b>    | <b>n = 94</b>     |
| <b>Sum of multiple answers</b>                                                                                                                                                       | <b>1239 (128%)</b> | <b>94 (171%)</b> | <b>36 (113%)</b> | <b>80 (167%)</b> | <b>84 (165%)</b> | <b>150 (140%)</b> | <b>41 (121%)</b> | <b>38 (112%)</b> | <b>41 (137%)</b> | <b>149 (113%)</b> | <b>97 (135%)</b> | <b>313 (113%)</b> | <b>116 (123%)</b> |
| Psychological counselling                                                                                                                                                            | 280 (29%)          | 18 (33%)         | 11 (34%)         | 10 (21%)         | 9 (18%)          | 87 (81%)          | 15 (44%)         | 5 (15%)          | 6 (20%)          | 46 (35%)          | 29 (40%)         | 26 (9%)           | 18 (19%)          |
| Self-help groups                                                                                                                                                                     | 30 (3%)            | 2 (4%)           | 0 (0%)           | 4 (8%)           | 3 (6%)           | 3 (3%)            | 2 (6%)           | 1 (3%)           | 1 (3%)           | 4 (3%)            | 1 (1%)           | 7 (3%)            | 2 (2%)            |
| Parent groups                                                                                                                                                                        | 133 (14%)          | 18 (33%)         | 2 (6%)           | 15 (31%)         | 26 (51%)         | 8 (7%)            | 3 (9%)           | 2 (6%)           | 5 (17%)          | 12 (9%)           | 5 (7%)           | 17 (6%)           | 20 (21%)          |
| Peer-to-peer support                                                                                                                                                                 | 101 (10%)          | 4 (7%)           | 0 (0%)           | 9 (19%)          | 23 (45%)         | 0 (0%)            | 2 (6%)           | 2 (6%)           | 3 (10%)          | 11 (8%)           | 1 (1%)           | 30 (11%)          | 16 (17%)          |
| Social worker                                                                                                                                                                        | 182 (19%)          | 42 (76%)         | 2 (6%)           | 27 (56%)         | 7 (14%)          | 33 (31%)          | 1 (3%)           | 5 (15%)          | 16 (53%)         | 0 (0%)            | 44 (61%)         | 4 (1%)            | 1 (1%)            |
| None                                                                                                                                                                                 | 462 (48%)          | 9 (16%)          | 21 (66%)         | 11 (23%)         | 9 (18%)          | 13 (12%)          | 17 (50%)         | 21 (62%)         | 8 (27%)          | 72 (55%)          | 11 (15%)         | 213 (77%)         | 57 (61%)          |
| Don't know                                                                                                                                                                           | 33 (3%)            | 1 (2%)           | 0 (0%)           | 1 (2%)           | 6 (12%)          | 2 (2%)            | 0 (0%)           | 2 (6%)           | 1 (3%)           | 3 (2%)            | 2 (3%)           | 14 (5%)           | 1 (1%)            |
| Other                                                                                                                                                                                | 18 (2%)            | 0 (0%)           | 0 (0%)           | 3 (6%)           | 1 (2%)           | 4 (4%)            | 1 (3%)           | 0 (0%)           | 1 (3%)           | 1 (1%)            | 4 (6%)           | 2 (1%)            | 1 (1%)            |

## Supplementary Material S9. Survey

### Impact of Coronavirus/COVID-19 on special/intensive care for newborns – a parents' perspective

**The Coronavirus/COVID-19 pandemic creates exceptional challenges, especially for the care of the most vulnerable groups of patients – such as sick and preterm born children. With this survey, we aim to explore parents' experiences related to these challenges as they play a crucial role in the care of their babies – not only at home but also in the hospital setting.**

**We therefore kindly ask you as parents of sick and preterm infants who were born during this Coronavirus/COVID-19 pandemic to participate in this survey. Please be aware that some of the questions might cause distressing reactions considering your personal situation and experience. You may of course stop your participation at any time. Completing the survey will take approx. 15 minutes.**

**Ethics and data use: EFCNI handles your data lawfully and confidentially, in accordance with the General Data Protection Regulation (GDPR). No person-related data will be stored or published. Your data will be evaluated anonymously, it will not be stored or passed on to third parties and will not be used for any other purpose than the one mentioned above. SurveyMonkey, the tool used for this survey, grants compliance with the GDPR and the Privacy Shield. In accordance with the GDPR, you have the right to information, the right to delete your data and can withdraw this declaration of consent at any time. The Ethics Committee of Maastricht UMC+ officially waived the need for ethics approval.**

**This survey is carried out by the Scientific Affairs Department of the European Foundation for the Care of Newborn Infants (EFCNI) ([www.efcni.org](http://www.efcni.org)) in collaboration with representatives of parent organisations, COINN (Council of International Neonatal Nurses), ESPR (European Society for Paediatric Research), NIDCAP (Newborn Individualized Developmental Care and Assessment Program), and UENPS (Union of European Neonatal & Perinatal Societies).**

**If you have any questions, comments or concerns regarding the study please contact: [research@efcni.org](mailto:research@efcni.org)**

**Thank you for your participation and support!**

**European Foundation for the Care of Newborn Infants (EFCNI)  
and Global Alliance for Newborn Care (GLANCE)**

**\* 1. I confirm to have read and understood the information provided above and consent to the use of my de-identified data.**

- Agree and continue
- Do not agree and end survey

## Impact of Coronavirus/COVID-19 on special/intensive care for newborns – a parents' perspective

### Background information

\* 2. How are you related to the newborn baby?

- Mother
- Father
- Other
- Other parent (please specify)

\* 3. Was your baby born on 1st of Dec 2019 or after?

- Yes
- No

\* 4. Did your baby receive special/intensive care after birth (exceeding regular care for healthy babies, e.g. oxygen therapy, incubator, intravenous infusions)?

- Yes
- No

5. Which country do you currently live in?

6. What is your age?

- Younger than 20
- Between 20 and 24
- Between 25 and 29
- Between 30 and 34
- Between 35 and 39
- Between 40 and 44
- Older than 44

## Impact of Coronavirus/COVID-19 on special/intensive care for newborns – a parents' perspective

7. When was your baby born?

Date

Date

DD/MM/YYYY

8. What week of pregnancy was your baby born at (gestational age)?

9. Was this a multiple pregnancy?

- Yes (Please note: when answering the following questions refer to the first-born baby of the pregnancy)
- No

10. How was your baby born?

- Vaginal birth
- C-section
- Both (e.g. in case of multiple pregnancy)

11. What was the birth weight of your baby?

- Under 1000 g (2,2 lbs)
- Between 1000 g (2,2 lbs) and 1500 g (3,3 lbs)
- More than 1500 g (3,3 lbs) and up to 2500 g (5,5 lbs)
- More than 2500 g (5,5 lbs)
- Don't know the birth weight

12. Does your baby still receive special/intensive care today?

- Yes
- No

13. How long did your baby receive special/intensive care (or until today if your baby is still receiving it)?

- Under 1 week
- Between 1 to 3 weeks
- More than 3 and up to 5 weeks
- More than 5 weeks

## Impact of Coronavirus/COVID-19 on special/intensive care for newborns – a parents' perspective

### Coronavirus/COVID-19

14. Different countries and regions have been addressing the threat of Coronavirus/COVID-19 in different ways. Which of the following best describes the situation in your country/region around the time of your baby's birth?

- There was no major concern about Coronavirus/COVID-19 in the country/region in which I live.
- People were advised to take precautions (e.g. hand washing) but day-to-day life continued as usual.
- Social distancing was strongly encouraged (e.g. keeping a distance, avoiding public gatherings) but no lockdowns were in place.
- Lockdown had been implemented (e.g. advised to stay home except for essential activities; schools, restaurants and non-essential businesses were closed).
- Quarantine was implemented and/or people were fined for leaving their homes without authorization.
- Other (please elaborate):

15. Have you tested positive for Coronavirus/COVID-19?

- Yes
- No
- No, but suspected case (based on symptoms)

16. Has your partner tested positive for Coronavirus/COVID-19?

- Yes
- No
- No, but suspected case (based on symptoms)
- Don't know

17. Has your baby tested positive for Coronavirus/COVID-19?

- Yes
- No
- Don't know



18. Did you have contact with a person who tested positive for Coronavirus/COVID-19 during the 2 weeks prior to your baby's birth?

- Yes
- No
- No, but suspected case (based on symptoms)
- Don't know

## Impact of Coronavirus/COVID-19 on special/intensive care for newborns – a parents' perspective

### Before and after birth

19. How was the timing of pregnancy-related appointments affected, if at all, by Coronavirus/Covid-19?

- It was done as usual.
- No appointments took place.
- Fewer appointments took place.
- Other (please explain):

20. Was another person permitted to accompany you to pregnancy-related appointments during the Coronavirus/COVID-19 phase?

- Yes
- Not to all appointments
- No, never
- Don't know
- Not applicable (e.g. no appointments took place)

21. Were you permitted to have another person present with you during birth (e.g. partner)?

- Yes
- No

22. For how long was this person permitted to stay with you?

- Not applicable; no other person was permitted to be present
- For the entire labour
- For a part of it (please elaborate):

23. When was skin-to-skin contact with your baby and one of the parents initiated (e.g. holding the baby on the chest, kangaroo mother care)?

- Immediately after birth
- On the first day
- After the first day but during the first week
- After the first week
- Not so far (If you are still in the hospital with your baby)
- Not during the time in the hospital (if you are already at home with your baby)

24. How often were you permitted to have skin-to-skin contact (kangaroo mother care) with your baby?

- As often as I wanted
- At least once per day
- At least once per week
- Less than once per week
- Not so far

25. Were you permitted to touch your baby in the incubator or bed?

- Yes
- No

26. How often were you permitted to touch your baby in the incubator or bed?

- As often as I wanted
- At least once per day
- At least once per week
- Less than once per week
- Not so far

## Impact of Coronavirus/COVID-19 on special/intensive care for newborns – a parents' perspective

### Breastfeeding/nutrition

27. Was initiation of breastfeeding encouraged by medical/nursing staff?

- Yes, highly encouraged
- Yes, somewhat encouraged
- No, not encouraged at all
- Don't know

28. Was your baby breastfed or provided with mother's own pumped/expressed breastmilk in the first weeks after birth?

- Yes, exclusively
- Yes, partly
- No, not at all
- Don't know

29. When did the initiation of breastfeeding or provision of mother's own pumped/expressed breastmilk take place?

- Not applicable; baby was not breastfed
- On the first day
- After the first day but during the first week
- After the first week
- Don't know

30. Were you allowed to bring expressed milk from home to the unit?

- Not applicable; baby was not breastfed
- Yes
- No, the milk had to be expressed at the hospital
- No, other

31. How was your baby fed? (*multiple answers possible*)

- With breastmilk (breastfeeding or pumped milk)
- With donor milk
- With formula milk
- Don't know

## Impact of Coronavirus/COVID-19 on special/intensive care for newborns – a parents' perspective

### Presence with the baby receiving special/intensive care

32. Do you know if the Coronavirus/COVID-19 situation affected the facility policy around your ability to be present with the baby receiving special/intensive care?

- There were no changes
- Restrictions were implemented
- I don't know if there were changes

33. Who was allowed to be present with your baby receiving special/intensive care? (*multiple answers possible*)

- Mother
- Father/partner
- Sibling/s
- Other family members
- Friends
- No one
- I don't know

34. Could more than one person be present with the baby at the same time?

- No
- Don't know
- Yes, both parents
- Yes, other (please explain):

35. How often were you allowed to see your baby receiving special/intensive care?

- All the time, (24/7)
- Multiple times per day
- Once per day
- Multiple times per week
- Once per week
- Less than once per week
- Never

36. How long were you allowed to see your baby per visit?

- Up to 15 minutes
- More than 15 minutes, up to one hour
- More than one hour, up to three hours
- More than three hours, but not unlimited
- Unlimited
- Not at all

37. Were sleeping facilities provided so you could stay with the baby (24/7)?

- Yes, sleeping facilities were provided next to my baby in the unit
- Yes, sleeping facilities were provided outside the unit (e.g. in an apartment house nearby, in another unit)
- No, sleeping facilities were not provided

38. Which alternatives to being present were provided with your baby receiving special/intensive care?  
(multiple answers possible)

- Photos
- Livestream
- Recorded video
- Video calls
- None
- Other, please specify:

39. Do you feel that the measures that were implemented due to Coronavirus/COVID-19 (e.g. restrictions by hospital management) made it more difficult for you to be **present** with your baby?

- Yes, much more difficult
- Yes, somewhat more difficult
- No, not more difficult
- No, there were no restrictive measures in place
- Don't know

40. Do you feel that the measures that were implemented due to Coronavirus/COVID-19 (e.g. restrictions by hospital management) made it more difficult for you to be **interactive** with your baby (e.g. skin-to-skin contact or being involved in the care of your baby)?

- Yes, much more difficult
- Yes, somewhat more difficult
- No, not more difficult
- No, there were no restrictive measures in place
- Don't know

41. Did medical/nursing staff involve you in the care of your baby (e.g. nappy changing, feeding, temperature taking)?

- Yes, to a high degree
- Yes, to some degree
- No, not at all
- Don't know

42. Did medical/nursing staff involve your partner in the care of your baby?

- Yes, to a high degree
- Yes, to some degree
- No, not at all
- Don't know
- I don't have a partner

## Impact of Coronavirus/COVID-19 on special/intensive care for newborns – a parents' perspective

### Communication

43. Do you feel you received or are receiving adequate general health information about your baby during the hospital stay?

- Yes, to a high degree
- Yes, to some degree
- No, not at all
- Don't know
- I didn't receive any information

44. How did you receive health information about your baby during the time your baby received or is receiving special/intensive care? (*multiple answers possible*)

- Meetings with medical/nursing staff (face to face)
- Meetings with medical/nursing staff (video conference)
- Phone calls
- E-Mails
- Letters
- Information material (e.g. brochure, website)
- I didn't receive information
- Other, please specify:

45. How often did you receive information about your baby during the time your baby received or is receiving special/intensive care?

- Multiple times per day
- Once per day
- Multiple times per week
- Once per week
- Less than once per week
- Never
- Don't know



46. Do you feel you received or are receiving adequate information about how to protect yourself and your baby from Coronavirus/COVID-19 transmission while your baby received or is receiving special/intensive care?

- Yes, to a high degree
- Yes, to some degree
- No, not at all
- Don't know
- I didn't receive any information

47. Do you feel you received adequate information about Coronavirus/COVID-19 when discharged from the hospital?

- Yes, to a high degree
- Yes, to some degree
- No, not at all
- Don't know
- I didn't receive any information
- No discharge yet

## Impact of Coronavirus/COVID-19 on special/intensive care for newborns – a parents' perspective

### Mental health and support

48. Did you worry because of the Coronavirus/COVID-19 situation during pregnancy?

- Yes, to a high degree
- Yes, to some degree
- No, not at all
- Don't know
- Coronavirus/COVID-19 was not an issue then.

49. Did/do you worry because of the Coronavirus/COVID-19 situation after the birth of your baby?

- Yes, to a high degree
- Yes, to some degree
- No, not at all
- Don't know

50. Did (or do) you struggle to be present with your baby who received or is receiving special care due to other obligations you have (e.g. for other children, family member/s)?

- Yes, to a high degree
- Yes, to some degree
- No, not at all
- Don't know

51. Do you feel you were adequately informed about mental health support (e.g. counselling, self-help/parent groups)?

- Yes, to a high degree
- Yes, to some degree
- No, not at all
- Don't know
- There was no mental health support

52. What kind of support was offered? (*multiple answers possible*)

- Psychological counselling
- Self-help groups
- Parent groups
- Peer-to-peer support
- Social worker
- None
- Don't know
- Other, please specify:

## 53. Do you have anything additional to share relating to the impact of Coronavirus/COVID-19 on special/intensive care for babies?

Impact of Coronavirus/COVID-19 on special/intensive care for newborns – a parents' perspective

**Thank you very much for your interest in our study. The aim of this survey is to explore parents' experiences related to the challenges caused by the Coronavirus/COVID-19 pandemic regarding the care of sick and preterm born children receiving special/intensive care. In case you have questions or comments feel free to contact us: [research@efcni.org](mailto:research@efcni.org)**

Impact of Coronavirus/COVID-19 on special/intensive care for newborns – a parents' perspective

**Thank you very much for your interest and for taking part in our survey “Impact of Coronavirus/COVID-19 on special/intensive care for newborns – a parents' perspective”. In case you have any questions or would like to contact us in the future, please send an email to: [research@efcni.org](mailto:research@efcni.org).**

**European Foundation for the Care of Newborn Infants (EFCNI): [www.efcni.org](http://www.efcni.org)**

**Global Alliance for Newborn Care (GLANCE): [www.glance-network.org](http://www.glance-network.org)**
